# Supplementary material for: NMR-based conformational analysis of DNA G-quadruplex guides mapping essential structure–function relationship in protein chaperoning
Source: Royal Society of Chemistry journal article supplement (doi:10.1039/d5cp03909f), 2025-12-22
Supplement: d5cp03909f2.xlsx [file d5cp03909f2.xlsx]

## Sheet: Fig.3 aggregation assay 
Time (s)	1:2 G9I	1:2 G9T	1:2 G12I	1:2 G12T	1:2 G17I	1:2 G17T	1:2 G17A	1:2 G17C	1:2 G17AP	1:2 G17isoG	1:2 Seq 576	1:2 Seq 42	1:2 htDNA	CS	buffer alone
0	4.94505	4.94505	3.2967	2.74725	5.49451	5.49451	3.2967	3.84615	1.64835	0.549451	1.0989	1.0989	1.0989	0	5.49451
50	4.3956	4.3956	3.2967	2.74725	4.94505	4.94505	3.2967	3.84615	2.74725	2.74725	1.0989	2.1978	1.0989	1.0989	4.94505
100	4.94505	4.3956	4.3956	2.74725	5.49451	5.49451	4.3956	3.84615	3.2967	3.2967	2.74725	2.1978	2.1978	2.1978	5.49451
150	3.84615	4.3956	4.94505	2.74725	4.94505	4.94505	3.84615	4.3956	3.84615	4.3956	3.2967	1.64835	2.1978	3.2967	4.3956
200	4.3956	4.3956	4.3956	2.74725	4.94505	4.94505	4.3956	3.84615	3.84615	3.84615	3.2967	1.64835	2.74725	3.84615	4.3956
250	3.2967	3.84615	4.3956	2.1978	4.3956	4.94505	3.84615	3.84615	3.2967	3.2967	3.2967	1.64835	2.74725	3.84615	3.84615
300	3.2967	2.74725	3.84615	1.64835	3.2967	3.84615	4.3956	3.2967	2.74725	3.2967	3.2967	1.64835	1.64835	3.84615	3.2967
350	2.74725	2.74725	3.2967	1.0989	3.2967	3.84615	7.14286	2.1978	3.2967	3.2967	3.2967	1.0989	1.64835	3.2967	3.2967
400	2.74725	2.74725	3.2967	1.64835	3.2967	3.84615	5.49451	2.1978	2.74725	3.2967	2.74725	0.549451	1.0989	3.84615	3.2967
450	2.74725	2.74725	3.2967	1.0989	3.2967	3.2967	4.3956	2.1978	2.1978	2.1978	2.1978	0	1.0989	2.74725	3.2967
500	2.1978	2.74725	4.94505	1.0989	2.74725	2.74725	4.3956	1.64835	2.1978	2.1978	2.1978	0.549451	1.64835	2.74725	4.3956
550	2.1978	2.74725	6.04396	1.64835	2.1978	3.2967	2.74725	1.64835	2.1978	2.1978	2.1978	0.549451	1.64835	2.74725	3.84615
600	2.1978	1.64835	3.84615	1.0989	2.1978	2.1978	2.74725	1.64835	1.64835	2.1978	2.1978	0.549451	1.0989	2.74725	2.74725
650	1.0989	1.64835	2.1978	1.0989	2.1978	2.1978	2.1978	1.64835	1.64835	2.1978	1.64835	0.549451	1.0989	2.74725	3.2967
700	2.1978	1.0989	1.64835	0.549451	1.64835	2.1978	2.1978	1.0989	1.64835	1.64835	1.64835	0.549451	1.0989	2.74725	3.2967
750	1.64835	1.0989	1.64835	0.549451	1.64835	1.64835	1.64835	1.0989	1.64835	1.0989	1.64835	0.549451	1.0989	2.74725	3.2967
800	1.0989	1.0989	1.64835	0.549451	1.64835	1.64835	1.64835	1.0989	1.64835	1.0989	1.64835	0.549451	1.0989	2.74725	3.2967
850	0.549451	1.0989	1.64835	0.549451	1.0989	1.0989	1.0989	1.0989	1.0989	1.0989	1.0989	0	0	2.1978	3.2967
900	1.64835	0.549451	1.64835	0.549451	1.0989	1.0989	1.0989	1.0989	1.0989	1.64835	1.0989	0	1.0989	2.1978	2.74725
950	1.0989	0.549451	1.0989	0	0	0.549451	1.0989	0	0	1.0989	0.549451	0	0	1.64835	1.64835
1000	1.64835	0.549451	1.0989	0	1.0989	1.0989	1.0989	1.0989	1.0989	1.64835	1.64835	0.549451	1.0989	2.1978	2.74725
1050	1.0989	0	0.549451	0	1.0989	1.0989	0.549451	1.0989	0.549451	1.0989	0.549451	1.0989	0.549451	2.1978	2.1978
1100	0	0	0.549451	0	0.549451	0	1.0989	1.0989	0.549451	0.549451	0.549451	1.64835	0.549451	2.1978	1.64835
1150	1.0989	0	0.549451	0	0	0	0.549451	1.0989	0	0.549451	0.549451	3.2967	1.64835	2.1978	1.64835
1200	1.64835	0.549451	1.0989	0.549451	1.0989	1.0989	1.0989	2.74725	0.549451	1.0989	1.0989	7.14286	2.1978	3.2967	2.1978
1250	0.549451	1.0989	1.0989	1.64835	1.0989	1.0989	1.0989	3.2967	1.64835	1.0989	1.0989	10.4396	3.84615	4.94505	2.74725
1300	2.1978	0.549451	0	1.0989	0.549451	1.0989	0.549451	4.94505	1.0989	0.549451	0.549451	14.2857	4.3956	6.59341	1.64835
1350	2.74725	0.549451	0.549451	2.1978	1.0989	1.64835	0	7.69231	2.1978	0	0	19.2308	6.04396	9.89011	1.0989
1400	3.2967	0.549451	0.549451	3.2967	2.1978	2.1978	0.549451	11.5385	3.84615	0	0.549451	25.2747	8.24176	14.2857	1.0989
1450	3.84615	1.0989	0.549451	4.94505	2.74725	5.49451	1.0989	15.9341	6.59341	0.549451	0	32.967	11.5385	19.7802	1.0989
1500	3.2967	3.2967	1.64835	6.59341	4.3956	8.79121	1.64835	20.8791	9.89011	0.549451	0.549451	40.1099	14.8352	26.3736	1.64835
1550	6.04396	4.3956	2.1978	8.79121	6.04396	13.7363	3.2967	26.9231	14.8352	1.0989	1.0989	48.3516	18.6813	34.0659	1.0989
1600	6.04396	4.94505	2.74725	10.4396	7.14286	18.6813	5.49451	32.967	19.2308	1.0989	0.549451	55.4945	23.0769	41.2088	1.0989
1650	6.59341	6.04396	4.3956	12.0879	9.89011	24.1758	8.24176	37.3626	23.6264	0.549451	0.549451	62.6374	26.3736	48.9011	0.549451
1700	7.14286	7.69231	5.49451	14.2857	11.5385	30.2198	12.6374	42.3077	28.5714	1.64835	1.0989	69.2308	31.3187	57.1429	1.0989
1750	9.34066	9.89011	6.04396	15.9341	13.1868	36.2637	18.1319	46.1538	33.5165	1.64835	1.64835	74.7253	34.6154	65.3846	1.64835
1800	8.24176	10.989	7.69231	17.033	14.8352	41.2088	23.0769	48.9011	37.3626	1.64835	2.1978	79.6703	37.3626	71.4286	0.549451
1850	9.34066	12.0879	8.79121	18.1319	15.9341	45.0549	28.022	51.6484	40.1099	1.64835	2.1978	82.967	41.7582	78.5714	1.0989
1900	10.4396	13.7363	10.4396	20.3297	18.1319	49.4505	31.8681	53.2967	43.4066	3.2967	2.74725	86.2637	43.956	84.6154	1.64835
1950	10.989	14.8352	10.989	20.3297	18.6813	51.0989	35.1648	54.9451	45.0549	3.2967	2.1978	89.5604	46.1538	89.011	0.549451
2000	10.4396	15.9341	12.0879	21.4286	19.7802	53.8462	38.4615	55.4945	46.1538	3.2967	3.2967	90.6593	48.3516	92.3077	1.0989
2050	10.4396	16.4835	12.6374	22.5275	20.8791	54.9451	40.6593	56.044	46.7033	3.84615	3.84615	91.7582	49.4505	95.0549	1.0989
2100	10.989	17.5824	13.7363	23.0769	21.4286	56.044	42.3077	56.044	47.8022	4.94505	3.84615	92.8571	50	97.8022	1.0989
2150	12.6374	17.5824	14.2857	23.0769	21.978	56.5934	42.8571	57.1429	47.8022	4.94505	3.84615	92.8571	51.0989	98.3516	1.0989
2200	12.0879	18.6813	14.8352	24.1758	22.5275	56.5934	43.4066	56.5934	47.8022	4.94505	3.84615	93.4066	51.6484	99.4505	1.0989
2250	13.1868	18.6813	14.8352	24.7253	23.0769	57.1429	43.956	56.5934	47.8022	4.94505	3.84615	93.4066	51.6484	99.4505	1.0989
2300	12.6374	19.2308	15.9341	24.7253	23.6264	57.1429	43.956	56.044	47.8022	4.94505	3.84615	92.3077	52.7473	100	1.0989
2350	12.6374	20.3297	16.4835	25.8242	23.6264	57.1429	44.5055	56.044	48.3516	4.94505	4.3956	92.3077	52.7473	100	0.549451
2400	12.6374	20.8791	16.4835	26.3736	25.2747	57.1429	44.5055	55.4945	47.8022	4.94505	4.3956	91.7582	52.7473	100	1.0989
2450	13.1868	20.8791	17.033	26.3736	25.2747	57.1429	44.5055	55.4945	47.8022	4.94505	4.3956	90.6593	52.7473	98.9011	0
2500	13.7363	20.8791	17.5824	26.3736	25.2747	57.1429	44.5055	55.4945	47.8022	4.94505	5.49451	90.6593	53.2967	98.9011	1.0989
2550	14.2857	21.4286	18.1319	27.4725	25.8242	57.1429	45.0549	55.4945	48.3516	6.59341	5.49451	90.6593	54.3956	98.9011	1.64835
2600	13.7363	21.4286	17.5824	26.9231	25.2747	56.044	43.956	54.3956	47.2527	4.94505	4.94505	89.011	52.7473	97.2527	0.549451
2650	13.1868	22.5275	19.2308	28.022	26.3736	57.1429	43.956	54.9451	47.8022	6.59341	5.49451	89.011	53.2967	97.2527	0.549451
2700	14.2857	22.5275	18.6813	27.4725	26.3736	56.044	43.956	54.3956	47.2527	6.59341	5.49451	87.3626	53.8462	96.7033	0
2750	15.9341	22.5275	19.2308	28.022	26.9231	56.044	43.956	54.9451	47.8022	6.59341	5.49451	87.3626	53.8462	96.7033	0.549451
2800	14.2857	22.5275	19.2308	28.5714	26.3736	56.044	43.956	54.3956	46.7033	6.59341	5.49451	87.3626	53.8462	95.6044	1.0989
2850	15.9341	22.5275	19.2308	28.5714	26.3736	55.4945	43.956	53.2967	46.7033	6.59341	5.49451	85.7143	53.8462	95.6044	1.0989
2900	14.8352	22.5275	19.7802	28.5714	26.9231	55.4945	43.956	53.2967	46.7033	6.59341	5.49451	85.7143	53.8462	95.6044	0.549451
2950	16.4835	23.0769	19.7802	28.5714	27.4725	55.4945	43.956	53.2967	46.7033	6.59341	5.49451	85.1648	53.8462	94.5055	0.549451
3000	14.8352	24.1758	20.3297	28.5714	28.022	55.4945	42.8571	52.7473	46.7033	6.59341	5.49451	84.0659	53.8462	93.956	1.64835
3050	15.3846	24.1758	20.8791	29.1209	28.022	55.4945	42.3077	52.7473	46.7033	6.59341	6.04396	83.5165	53.8462	93.956	0.549451
3100	15.3846	24.1758	20.8791	28.5714	28.022	55.4945	42.3077	52.1978	46.7033	6.59341	5.49451	82.967	53.8462	92.8571	0.549451
3150	16.4835	24.1758	20.8791	29.6703	28.022	54.3956	42.3077	51.6484	46.1538	6.59341	5.49451	82.4176	53.8462	91.7582	0.549451
3200	15.3846	24.1758	21.4286	29.1209	28.022	54.3956	42.3077	51.6484	46.1538	6.59341	6.04396	82.4176	53.8462	91.7582	1.0989
3250	17.033	24.7253	21.4286	29.6703	28.022	54.3956	42.3077	51.6484	46.1538	6.59341	6.04396	81.8681	53.8462	91.7582	0.549451
3300	16.4835	25.2747	21.4286	30.2198	28.022	54.3956	41.7582	51.0989	45.6044	6.59341	6.59341	81.3187	53.8462	90.6593	1.64835
3350	17.033	24.7253	21.978	30.2198	28.022	53.8462	41.7582	50.5495	45.0549	6.59341	6.59341	80.2198	53.8462	90.6593	1.0989
3400	17.5824	25.2747	21.4286	30.2198	29.1209	53.8462	41.7582	50.5495	45.6044	7.69231	7.14286	79.6703	53.8462	90.1099	1.64835
3450	17.033	25.8242	22.5275	30.2198	29.1209	53.8462	41.7582	50.5495	45.0549	7.14286	7.14286	79.1209	53.8462	89.011	1.64835
3500	17.033	25.8242	22.5275	30.2198	29.1209	53.8462	41.2088	50.5495	45.6044	7.14286	7.14286	78.5714	53.8462	89.011	1.64835
3550	17.5824	25.8242	22.5275	30.2198	29.1209	52.7473	40.6593	48.9011	45.0549	7.14286	7.14286	78.022	53.8462	88.4615	0.549451
3600	17.033	25.8242	23.0769	30.2198	29.1209	52.7473	40.6593	48.9011	45.0549	8.24176	7.14286	78.022	53.8462	87.9121	1.64835
3650	18.1319	25.2747	22.5275	30.2198	29.1209	52.7473	40.1099	48.9011	45.0549	7.69231	7.14286	76.3736	53.2967	87.3626	1.64835
3700	17.5824	25.8242	23.0769	30.2198	29.1209	52.7473	40.1099	48.9011	45.0549	8.24176	7.14286	76.3736	53.8462	87.3626	1.64835
3750	17.033	25.8242	23.0769	30.2198	29.1209	52.1978	39.5604	47.8022	43.956	7.14286	7.14286	75.2747	53.2967	86.8132	1.0989
3800	17.033	25.8242	23.0769	30.2198	29.1209	52.1978	39.5604	47.2527	43.956	8.24176	7.14286	75.2747	52.7473	85.7143	1.0989
3850	18.6813	25.8242	23.0769	30.2198	29.1209	51.6484	39.5604	47.2527	43.4066	8.24176	7.14286	74.7253	53.2967	85.7143	0.549451
3900	19.7802	26.9231	23.6264	30.2198	29.1209	51.6484	39.5604	47.8022	43.956	8.24176	7.14286	74.7253	53.8462	85.1648	1.64835
3950	18.1319	25.8242	23.6264	30.2198	29.1209	51.6484	38.4615	47.2527	43.4066	8.24176	7.14286	73.0769	52.7473	84.0659	2.1978
4000	19.2308	25.8242	23.0769	30.2198	29.1209	51.6484	38.4615	46.1538	43.4066	8.24176	7.14286	73.0769	52.7473	83.5165	1.0989
4050	18.1319	26.3736	23.6264	30.2198	29.1209	51.0989	38.4615	45.6044	43.4066	8.24176	7.14286	72.5275	52.7473	83.5165	1.0989
4100	19.2308	26.3736	23.6264	30.2198	29.1209	50.5495	38.4615	45.6044	43.4066	8.24176	7.14286	71.978	52.7473	82.4176	1.64835
4150	18.6813	26.3736	24.1758	30.2198	29.1209	50.5495	38.4615	45.6044	42.8571	8.24176	7.14286	71.4286	52.7473	82.4176	1.64835
4200	19.7802	26.3736	24.1758	30.2198	29.1209	50	37.3626	45.6044	42.8571	8.24176	7.14286	71.4286	52.7473	81.8681	1.0989
4250	18.6813	27.4725	24.7253	30.2198	29.1209	50	36.8132	45.0549	42.3077	8.24176	7.14286	70.8791	52.7473	81.8681	1.64835
4300	18.6813	26.9231	24.1758	30.2198	29.1209	50	36.8132	43.956	42.3077	8.24176	7.14286	69.2308	52.7473	80.2198	1.0989
4350	19.2308	27.4725	24.7253	30.2198	29.1209	50	36.8132	44.5055	42.3077	8.24176	8.24176	69.7802	52.7473	80.7692	2.74725
4400	19.7802	27.4725	24.1758	30.2198	29.1209	50	36.8132	43.956	41.7582	8.24176	7.69231	68.6813	52.7473	80.2198	1.0989
4450	19.2308	26.3736	24.1758	29.6703	29.1209	49.4505	36.2637	43.956	41.7582	8.24176	7.69231	68.6813	52.7473	79.6703	1.0989
4500	19.2308	26.9231	24.7253	30.2198	29.1209	49.4505	36.8132	43.4066	41.2088	8.24176	8.24176	68.1319	52.7473	79.6703	1.64835
4550	20.3297	27.4725	25.2747	30.2198	29.6703	48.3516	36.2637	43.4066	41.7582	8.79121	8.24176	68.1319	52.7473	79.1209	2.1978
4600	19.2308	26.3736	24.7253	30.2198	29.1209	48.3516	35.1648	42.3077	41.2088	8.24176	7.69231	66.4835	52.1978	78.022	2.1978
4650	19.7802	26.9231	24.7253	30.2198	29.1209	48.3516	35.1648	42.3077	40.6593	8.24176	8.24176	67.033	52.7473	78.022	2.1978
4700	20.3297	27.4725	25.8242	30.2198	30.2198	48.3516	35.1648	42.3077	41.2088	8.79121	8.79121	65.9341	52.7473	78.022	2.1978
4750	20.3297	27.4725	25.2747	30.2198	29.1209	48.3516	35.1648	42.3077	41.2088	9.34066	8.79121	65.9341	52.7473	77.4725	1.64835
4800	20.3297	27.4725	24.7253	30.2198	30.2198	48.3516	35.1648	41.7582	41.2088	8.79121	8.79121	65.3846	52.7473	76.3736	2.1978
4850	20.3297	27.4725	24.7253	29.6703	29.1209	47.2527	34.6154	40.6593	40.1099	9.89011	8.79121	64.8352	52.1978	76.3736	1.64835
4900	20.3297	27.4725	25.2747	29.1209	29.1209	47.2527	34.6154	40.1099	39.5604	8.79121	8.79121	64.2857	52.1978	75.8242	2.1978
4950	20.8791	27.4725	25.2747	30.2198	30.2198	46.7033	34.6154	40.1099	40.1099	9.89011	8.79121	64.2857	52.1978	75.8242	1.64835
5000	21.4286	27.4725	25.2747	30.2198	29.1209	46.7033	34.0659	40.1099	39.5604	9.34066	8.79121	63.7363	52.1978	74.7253	1.0989
5050	20.3297	27.4725	26.3736	29.6703	30.2198	46.7033	34.0659	40.1099	39.5604	9.89011	8.79121	63.1868	52.1978	74.7253	2.1978
5100	20.8791	26.9231	25.2747	29.1209	29.1209	46.1538	32.967	39.011	38.4615	8.24176	8.24176	62.6374	52.1978	73.0769	1.0989
5150	20.3297	27.4725	25.8242	29.1209	29.1209	46.1538	32.967	39.011	39.011	9.34066	8.79121	62.0879	51.6484	73.0769	1.64835
5200	21.978	27.4725	25.2747	29.1209	29.1209	46.1538	32.967	38.4615	38.4615	9.89011	8.79121	61.5385	52.1978	73.0769	1.64835
5250	20.8791	27.4725	25.8242	29.1209	30.2198	46.1538	32.967	39.011	39.011	9.89011	8.79121	61.5385	52.1978	73.0769	2.1978
5300	20.8791	27.4725	25.8242	29.1209	29.6703	45.6044	32.4176	38.4615	38.4615	9.89011	8.79121	61.5385	51.6484	72.5275	2.1978
5350	21.978	26.9231	25.2747	29.1209	29.6703	45.0549	32.4176	37.3626	37.9121	9.89011	8.79121	60.4396	52.1978	71.978	2.1978
5400	20.8791	27.4725	26.3736	28.5714	29.6703	44.5055	32.4176	37.3626	37.9121	9.34066	8.79121	60.4396	51.6484	70.8791	1.0989

## Sheet: Fig.4 refolding assay
Trial1															Trial2															Trial3
Time (min)	+Seq576	+G9I	+G9T	+G12I	+G12T	+G17I	+G17T	+G17A	+G17C	+G17AP	+G17isoG	TagRFP675	+Seq42		Time (min)	TagRFP675	+G9I	+G9T	+G12I	+G12T	+G17I	+G17T	+G17A	+G17C	+G17AP	+G17isoG	+Seq42	+Seq576		Time (min)	TagRFP675	+Seq576	+G9I	+G9T	+G12I	+G12T	+G17I	+G17T	+G17A	+G17C	+G17AP	+G17isoG	+Seq42
0.000833333	0.299587	0.251104	0.373357	0.571039	1.39445	1.19595	1.06817	1.08234	1.25254	0.395306	1.34076	0.538286	0.274908		0.000833333	0.429301	0.526912	0.912583	0.425623	0.0640164	0.906247	1.116	0.373046	0.683456	1.08044	1.78498	0.785264	1.06403		0.000833333	0.490368	0.803482	0.79263	1.0903	0.883361	0.197681	0.734914	0.856653	0.420108	0.355147	1.29749	0.686961	0.874901
0.0025	1.1089	0.456403	0.341824	0.88465	0.235675	1.18024	0.781018	1.22168	1.00661	0.347677	0.97454	0.683118	0.585239		0.0025	0.695365	0.622026	0.500511	0.144116	0.230381	0.803853	0.630398	1.15398	0.829394	0.827517	1.06589	0.960868	1.01699		0.0025	0.714796	0.787178	1.03563	0.314608	0.0368402	0.856898	0.891497	1.53401	-0.008026	1.22677	2.80118	0.354304	0.7998
0.00416667	0.936188	0.754779	0.913097	1.12324	0.296964	1.38619	0.933735	1.46413	0.274555	0.413266	1.2666	0.511634	0.532697		0.00416667	0.971839	-0.0431817	1.50554	0.655013	0.311132	0.297353	0.59931	1.06497	0.577231	0.552102	0.467141	0.67336	1.23027		0.00416667	0.791089	1.3691	1.37525	0.0901164	0.0813655	0.882594	1.14998	0.562685	0.846194	0.935454	0.909525	0.34396	1.39037
0.00583333	0.581568	0.816805	0.782958	0.678857	0.930334	0.8642	0.957466	1.18539	0.490891	0.473438	1.11695	0.812241	1.11378		0.00583333	0.707973	0.940836	0.358824	0.477651	0.471437	1.01388	0.701128	0.734442	1.02113	0.794412	0.891587	0.900585	0.653648		0.00583333	0.803536	0.230971	0.909942	0.204897	0.0137222	0.555105	1.15182	0.836515	1.39344	0.705074	0.991168	0.105075	1.26109
0.0075	1.27805	0.706243	0.213298	0.818366	0.4054	1.28887	0.521182	1.02997	1.20999	0.528133	1.60772	0.594478	0.5		0.0075	0.435597	0.669163	1.05886	0.0926033	0.718968	0.423396	0.806018	1.58437	0.64636	0.84408	0.850952	0.617485	1.00996		0.0075	0.867843	0.392559	1.22708	1.0503	0.800732	1.48179	1.85962	0.476635	0.485159	0.345821	1.60489	0.637091	1.02007
0.00916667	-0.0593239	1.3662	0.144461	0.495925	0.651105	1.22347	0.698857	1.47173	0.247384	0.94485	1.72859	1.16247	0.946249		0.00916667	0.354241	0.253985	0.793551	0.535588	0.704707	1.09004	0.85772	0.648979	0.777923	1.156	1.15989	0.944383	0.976096		0.00916667	0.887676	0.759499	1.10535	-0.166545	0.094967	1.18684	0.356335	0.8018	0.45495	0.490546	1.02709	0.510031	1.07628
0.0108333	0.931865	0.58086	0.19521	1.11048	1.16112	1.78504	0.699645	1.11568	0.853493	0.592393	1.16973	1.14699	0.338632		0.0108333	0.822582	0.930215	1.14387	0.496477	0.980852	1.22722	1.10132	0.617262	1.19951	0.605721	0.961659	0.926392	0.92466		0.0108333	0.880414	0.167532	0.986179	0.200784	-0.295077	0.679218	0.839572	0.835569	0.945858	0.657581	1.57302	0.346043	1.06438
0.0125	0.58619	0.700021	0.991477	1.03267	0.0732908	1.48594	0.729142	1.3899	0.364534	0.328333	0.989324	0.693496	0.302441		0.0125	0.476603	1.18786	0.711744	0.630177	0.782134	0.530238	0.655791	0.865788	1.08146	0.812689	0.37332	0.574314	1.21845		0.0125	0.991779	0.74689	1.40364	0.488602	0.491071	0.655876	1.07394	1.02196	1.05571	0.461812	1.15031	0.271694	0.806796
0.0141667	0.956499	0.377899	0.481011	1.20464	0.532691	1.10455	0.78016	1.01204	0.841855	0.54626	1.31083	0.70555	0.837134		0.0141667	1.06801	2.10167	0.57033	0.802023	0.991572	0.68483	0.465539	1.04384	1.05432	0.526912	0.384451	0.595596	0.936602		0.0141667	0.979543	0.925294	1.5448	-0.0552872	0.869378	0.508927	1.20887	0.811722	0.202028	0.567971	1.22132	0.510714	0.600539
0.0158333	1.17526	0.340511	0.434689	1.22819	0.424449	1.3648	0.367263	2.3194	-0.0497372	0.363504	1.28569	0.928505	0.550509		0.0158333	0.131912	0.388562	0.438322	1.09205	0.829699	0.744114	0.461913	0.556977	1.28885	0.552828	0.948587	0.0309695	0.784456		0.0158333	1.19125	0.746555	0.938954	1.10539	0.341743	0.520996	0.707075	0.559959	0.453428	0.547082	1.30347	0.614706	1.36023
0.0175	0.769183	0.619515	0.910008	1.23181	0.109128	1.12906	0.405284	1.73214	0.151079	0.559239	0.907496	1.30557	1.04981		0.0175	0.772449	1.014	0.936758	0.740428	0.305877	1.38964	0.702318	1.32329	0.840619	0.319996	0.903722	1.32487	0.609682		0.0175	0.521501	0.440509	0.505449	0.416856	0.601282	0.461584	0.30789	0.826549	0.309443	0.895803	1.33886	0.761502	0.170666
0.0191667	1.11797	0.448531	-0.238617	1.19494	-0.0318749	1.13576	0.343129	1.49071	-0.0554415	0.449071	1.04749	1.02477	0.745061		0.0191667	0.557509	0.677543	0.211158	0.350032	0.821444	1.23501	0.84665	0.988236	0.670143	0.422564	0.867195	0.310294	1.39881		0.0191667	0.432975	0.303286	0.729254	0.574531	0.276815	0.95761	0.926993	0.536331	0.593525	0.409939	1.23697	0.741962	0.803427
0.0208333	1.01888	0.318516	0.330843	1.29575	0.0955904	0.988162	0.84245	1.7247	0.395119	1.06563	0.836257	1.15562	0.719607		0.0208333	0.951153	0.476675	0.421186	0.593708	0.480337	1.07709	0.880614	0.840919	0.689396	0.774548	1.02284	0.963077	1.05502		0.0208333	0.56338	0.817064	0.282654	0.302245	0.626529	0.925129	1.51039	0.571489	-0.0748908	0.524866	1.67562	0.454074	0.467193
0.0225	0.846389	0.818641	0.144362	1.0901	0.724328	0.748503	0.462918	0.987167	0.468004	0.489366	1.22424	1.0595	0.48555		0.0225	0.897902	0.607046	0.537172	0.888962	0.775259	0.831107	0.642154	0.494705	0.987291	0.732773	0.626296	0.44282	0.786132		0.0225	0.799758	0.645765	0.0274906	0.922027	0.757534	0.784846	0.509418	0.8166	0.109665	0.26976	1.39257	0.530223	0.23604
0.0241667	1.75447	0.668273	0.221827	0.954447	0.413775	1.79637	-0.122735	1.03834	0.181862	0.456725	1.59694	0.899338	0.726418		0.0241667	0.762195	0.760563	1.18404	0.0435079	0.885403	1.64291	0.97468	0.521646	0.615973	0.739021	0.70549	0.691305	0.98859		0.0241667	0.554336	0.701693	0.967525	0.773891	0.733235	1.00835	1.07192	0.67981	0.324767	0.513416	1.6447	0.369975	0.972919
0.0258333	1.28014	0.711833	0.201665	0.899281	0.390241	1.41165	0.518042	1.60089	1.57295	0.406736	2.00514	1.06431	0.647784		0.0258333	0.779221	1.50297	0.724988	0.152822	0.667772	1.15814	0.577911	0.935317	0.227644	0.961087	0.450093	1.00434	0.345676		0.0258333	0.907215	0.572007	1.14054	-0.0948276	0.557034	0.704872	0.683679	0.859017	0.695206	0.520162	0.847807	0.481981	1.0156
0.0275	0.697128	0.567096	1.02407	1.55276	1.0423	1.33145	1.06173	1.64197	0.645902	0.467793	0.421036	0.229291	0.436538		0.0275	1.30815	0.88962	0.82383	0.0100602	1.2503	0.6085	0.869727	0.446966	0.415636	0.814922	1.04835	0.438942	0.959553		0.0275	0.346455	0.30776	0.668521	0.39297	0.447267	0.514403	1.06731	0.757512	0.341072	0.494771	1.21638	0.516318	0.94421
0.0291667	0.861593	0.479496	0.609045	1.05324	0.723947	1.75	1.053	1.28052	0.737288	0.309119	1.22438	0.92977	0.622224		0.0291667	0.601142	1.75936	0.825351	-0.0311914	0.833281	0.23253	0.562723	0.402525	0.839703	0.172259	0.804914	1.01088	0.643354		0.0291667	0.650336	0.370064	0.649373	0.309699	-0.338984	0.582569	0.985384	1.28858	0.336124	1.1616	1.49035	0.212328	-0.0327332
0.0308333	0.514486	0.716728	0.330338	0.622394	0.24384	1.52476	0.843411	1.52198	0.385786	0.182319	1.17296	0.837331	1.01857		0.0308333	1.02147	1.02973	0.756315	0.259524	0.71833	1.59888	0.64648	0.967914	1.22118	0.920246	1.46363	0.976873	0.729439		0.0308333	1.12869	0.939471	0.806435	1.12785	-0.0567777	0.315298	0.225411	0.525067	1.05389	0.533247	1.44762	0.490342	1.21715
0.0325	0.773855	0.225905	0.32585	1.44494	0.309992	1.42662	0.649348	1.54163	0.884526	0.924936	1.08645	0.710022	0.531067		0.0325	2.30459	0.220616	0.848248	0.713283	0.530572	1.00684	0.83956	1.10566	1.00683	0.501787	1.1334	1.77572	0.816087		0.0325	2.06422	0.259622	1.49355	0.602564	-0.520717	1.04757	1.41746	0.581174	0.777185	0.294204	1.24514	0.217491	0.995056
0.0341667	0.97003	0.692464	0.421464	0.500699	0.290212	1.36998	1.0858	0.944723	0.580074	0.33653	0.725119	0.809189	0.787057		0.0341667	1.68915	0.869007	0.581233	2.41686	0.340158	1.92127	0.713042	0.179245	0.687064	1.53568	0.546896	1.18504	0.827235		0.0341667	1.5521	0.535858	1.30127	0.670427	0.949426	0.793923	0.545098	0.91638	0.811954	0.896243	1.44243	0	0.548673
0.0358333	1.29573	0.447209	0.106195	0.467796	0.168568	0.974184	1.11856	1.36387	1.28535	0.246939	0.993109	1.07031	0.726232		0.0358333	1.0304	1.17644	0.870189	1.11888	0.636916	0.873297	1.01401	1.82438	0.857974	0.816317	0.584618	0.869625	0.952265		0.0358333	0.715671	0.542806	1.12571	0.894106	0.204848	1.25968	0.583782	0.57643	1.02877	0.678626	1.31311	0.478427	0.549039
0.0375	0.692189	0.611845	0.668826	0.918136	0.3494	1.35672	1.2604	1.57149	0.318251	0.400216	1.44211	0.413727	0.43382		0.0375	0.306352	0.259392	0.773827	0.955548	0.623338	0.918077	0.573541	1.49995	0.791867	0.339658	0.420428	0.461447	1.23093		0.0375	0.463668	0.319584	1.28549	1.09882	-0.0111558	0.425016	0.237317	0.525187	0.85109	0.814443	1.6376	0.494879	1.25331
0.0391667	1.6239	0.497234	0.045378	0.977476	0.906222	0.876843	0.753608	1.09449	0.644559	0.588247	1.70396	0.994874	0.241541		0.0391667	0.738777	0.957673	0.6453	0.69076	0.617805	0.019567	0.489406	0.458212	0.890712	0.582553	1.03701	1.21271	0.683598		0.0391667	0.547705	0.436645	1.38532	0.0724447	-0.303444	0.723758	0.996382	0.472701	0.160477	0.927439	0.722844	0.784813	1.87223
0.0408333	0.78151	0.578955	0.510268	0.289909	0.18755	1.01551	0.951868	1.30677	0.305346	1.14524	0.867425	0.875932	0.840002		0.0408333	0.867804	0.389321	0.459227	0.415413	0.716317	1.39635	1.29746	0.817793	1.10188	1.18492	0.711252	0.940478	0.713543		0.0408333	0.173981	0.410989	0.43156	0.551056	0.169485	0.598879	0.80101	1.06619	0.777067	0.971796	1.68803	0.734405	0.873673
0.0425	1.41229	0.390874	0.239679	1.09341	0.0562893	1.22709	0.572423	0.637808	0.640842	0.511635	0.950236	0.561616	1.16871		0.0425	0.460012	0.500875	0.645564	0.339816	0.566997	0.937613	0.678671	-0.0812554	1.01345	0.984414	0.854701	0.508738	0.589791		0.0425	0.477524	1.13431	0.547144	0.278337	1.36418	1.6835	0.797743	0.71376	0.522208	0.417256	0.955089	0.49639	0.698225
0.0441667	1.1023	0.592683	-0.0382724	1.13617	0.609438	0.977108	0.531644	1.23773	0.801764	0.428012	1.51193	1.08812	0.582555		0.0441667	0.909837	0.702375	0.24506	0.331186	0.516764	0.835398	0.819001	0.802382	0.89741	0.733945	0.757723	0.808093	1.17589		0.0441667	0.662764	0.613349	1.05505	0.484327	0.872753	0.774723	1.02926	0.9298	0.484848	0.404979	1.14736	0.642206	0.781039
0.0458333	0.694845	0.224074	0.635091	0.951676	0.446921	1.2903	0.598008	1.58622	0.173008	0.724248	0.62448	0.457237	1.01101		0.0458333	0.401759	0.352348	0.734516	0.854168	0.659757	1.13353	0.942685	0.495272	0.949167	1.06401	1.10285	0.389173	0.979632		0.0458333	0.62844	0.383738	0.535244	0.508873	0.409719	0.704663	0.862197	0.451002	0.849032	0.522561	0.706714	0.106009	0.822774
0.0475	0.940028	0.385117	0.630621	0.815592	0.262801	1.17057	1.58499	1.32229	0.461164	0.100486	1.18696	0.622077	0.893655		0.0475	0.50494	0.543895	0.715137	-0.0133742	1.05463	0.750095	0.131392	0.582679	0.606314	0.916596	0.867872	1.11101	1.61832		0.0475	0.803105	0.550212	0.811238	0.488747	0.342315	1.52848	0.416195	0.86704	0.427138	0.810018	1.74644	0.173085	1.56748
0.0491667	0.265436	0.167891	0.639274	1.34652	0.461068	1.64897	1.94026	1.46765	0.416221	0.545499	0.965911	0.735229	0.497884		0.0491667	0.534509	1.63414	0.768656	0.562975	0.467916	0.726279	0.562699	0.431217	0.972079	0.247419	0.614667	0.919021	0.740269		0.0491667	0.612075	0.521275	1.33808	0.945608	0.148399	1.07659	1.45695	0.531293	0.516266	0.9452	1.1148	0.829187	1.02012
0.0508333	0.804605	0.819534	1.57595	1.17391	0.617511	0.549741	0.6388	1.21055	0.355301	0.243947	0.999604	0.933707	0.557526		0.0508333	0.466822	0.694005	0.632759	-0.374258	0.230806	0.977272	0.430737	0.652927	0.724833	0.825954	0.938557	0.696809	0.892242		0.0508333	0.590293	1.34377	1.50774	-0.207555	-0.1813	0.39947	0.801531	1.31386	0.631676	0.424297	1.50443	0.702651	1.40885
0.0525	0.767189	0.654437	1.26916	0.953976	0.419987	0.855084	0.209983	0.902622	0.296296	0.344758	0.826344	1.44759	0.777672		0.0525	0.750944	0.734046	0.387964	0.0638992	0.883297	1.2623	0.663144	0.741027	0.70543	0.167007	1.12202	0.846193	0.9627		0.0525	0.654208	0.572738	0.588276	0.265823	0.349741	0.849488	0.431732	0.783284	0.99115	0.57674	0.767893	0.360498	0.883602
0.0541667	1.88815	0.684761	0.464833	0.827952	-0.208737	1.10995	0.707573	1.7136	0.751979	0.488958	1.10672	0.868413	0.667557		0.0541667	0.23661	0.704402	0.772118	1.29314	0.756112	1.19285	0.592482	0.550625	0.713544	0.32278	0.963886	0.832369	0.865319		0.0541667	0.728691	0.452172	0.355772	0.127958	-0.32904	0.884211	0.79672	0.845382	0.394001	0.748239	1.08994	0.448507	0.905012
0.0558333	0.858891	0.557897	0.437783	0.449823	0.661168	1.1137	0.494957	1.56769	0.391134	0.564345	1.34889	0.647423	0.818965		0.0558333	0.50453	0.814732	0.746794	0.135585	0.591628	1.0091	1.41832	0.743621	0.797817	0.134977	1.29646	0.461622	0.372032		0.0558333	0.901655	0.80575	0.345329	0.314005	0.799542	1.64141	1.43474	0.595808	1.1225	0.743813	1.11247	0.107821	0.808511
0.0575	0.960582	0.785129	0.204397	1.32566	0.0606216	1.02237	1.08392	1.47032	0.797809	0.368966	1.25816	0.923012	1.16507		0.0575	0.674089	0.357872	0.666045	0.945138	0.847637	0.536697	0.859051	1.29493	0.497717	0.826329	1.16256	1.30481	1.50839		0.0575	1.0221	0.782354	0.325996	0.424624	0.24216	0.930843	0.439653	0.924001	0.582137	0.512124	1.62104	0.306991	1.23095
0.0591667	0.683917	0.464057	0.619008	0.788307	0.326273	1.37051	0.606311	1.81133	0.627102	0.604129	1.2601	0.56049	0.675747		0.0591667	1.10891	1.3527	0.542888	0.178992	0.80938	1.4338	1.17284	0.644386	0.847583	0.839811	0.607771	0.626552	0.696037		0.0591667	0.474189	0.743755	0.783279	0.139265	-0.370201	0.877431	0.853785	0.898079	0.703431	0.539605	1.09775	0.237422	0.671882
0.0608333	0.826833	0.562922	0.642178	1.64647	-0.697729	1.03374	1.1143	1.15281	-0.284256	0.570939	0.88075	0.833743	0.917451		0.0608333	0.252589	0.560679	0.437984	0.509043	0.482484	1.18476	0.378971	0.837438	0.933984	0.92997	0.631499	0.249089	0.963213		0.0608333	0.430432	0.542265	1.01181	0.158926	0.457464	1.25235	0.236911	1.0893	0.547004	0.840503	1.04568	0.586191	0.809526
0.0625	0.310757	0.992629	0.221462	1.13342	-0.120171	1.09188	0.856973	1.19185	0.491956	0.249813	1.08278	1.20213	0.323848		0.0625	0.558179	0.626257	0.63196	0.613246	0.722702	1.01445	0.438645	1.12676	0.445529	0.699633	0.577577	1.69179	0.639241		0.0625	0.382469	0.578047	0.646839	0.276623	0.785988	0.313309	1.66014	0.891634	1.36866	0.436024	1.16736	0.647487	0.592014
0.0641667	1.13958	0.668589	-0.0276887	0.850847	0.211895	1.08291	0.857777	1.92974	0.543983	0.22529	0.79735	0.830972	0.955428		0.0641667	0.659112	0.647413	0.931636	0.638592	0.425613	2.05676	0.74622	0.744411	0.834171	0.865672	0.797637	1.00816	1.17106		0.0641667	0.98786	0.327361	1.94472	0.116441	0.302545	0.165793	0.555668	0.728445	0.741507	1.07568	2.57081	0.254793	0.752399
0.0658333	1.05652	1.14105	0.902204	0.958671	0.288495	1.09573	0.450006	0.799411	0.702075	0.703772	1.04306	0.74689	0.587889		0.0658333	0.779406	0.438639	0.620155	0.690961	0.622398	1.15932	0.368543	0.317089	0.987561	0.795332	0.342576	0.975445	0.728722		0.0658333	0.52627	0.463871	1.12267	0.392091	0.0952312	0.524307	1.03756	0.832348	0.527473	0.918459	0.96324	0.653457	0.970832
0.0675	0.811787	0.713596	0.206715	0.76089	0.424704	1.55958	0.900791	1.3081	0.667277	0.912335	1.07859	0.83954	0.433981		0.0675	0.640785	0.851228	0.889303	0.374076	0.655128	1.05351	0.65189	0.802413	1.1482	0.576111	1.05672	1.03097	1.23094		0.0675	0.73127	1.01868	0.734215	0.632082	0.860479	1.00965	0.512732	0.829857	0.510881	0.40525	0.950087	0.154171	1.00018
0.0691667	1.53839	0.373266	0.165091	0.850823	0.565071	1.86792	0.903436	1.1202	0.508454	0.662293	1.38805	1.07925	0.578766		0.0691667	1.32759	1.79243	0.742164	-0.0496966	0.783301	0.893427	0.860178	1.30611	0.972043	0.528822	0.903283	1.07372	1.14245		0.0691667	0.654421	0.635109	0.342732	0.626864	0.0281173	0.70292	0.213408	0.47467	0.818221	-0.350455	0.988294	0.130245	1.09302
0.0708333	1.04836	0.242323	0.334745	1.32196	-0.04293	1.1394	0.75683	1.2124	0.848118	0.465163	1.0263	0.838511	0.59838		0.0708333	0.939188	1.04288	0.942507	-0.200121	0.96084	1.0494	0.7348	0.745382	0.858118	1.03618	0.772023	0.539902	0.854007		0.0708333	1.06845	0.716815	0.0619544	-0.00833005	0.145159	0.73079	1.05522	0.756332	0.376718	0.801246	0.892339	0.720431	1.39851
0.0725	0.881409	0.847709	0.215067	0.940302	0.347801	1.08662	1.36711	1.45273	0.852125	0.71363	0.640059	1.06496	0.96368		0.0725	0.747017	1.22758	1.26086	0.25864	0.595061	0.57961	0.720902	0.567202	0.527337	0.286063	0.656465	1.1922	1.05259		0.0725	0.223904	0.775974	0.627017	0.724815	0.0325506	0.993154	0.730177	0.832583	0.329613	0.6185	1.03856	0.307395	0.678754
0.0741667	1.45586	0.798756	0.241506	0.66107	-0.203207	1.13477	0.253368	0.953424	0.224306	0.45478	1.06168	1.11223	0.904359		0.0741667	0.539409	0.696122	0.65294	0.956989	0.972372	1.6014	0.620613	0.802897	1.61297	0.0212729	0.747565	0.912327	0.863662		0.0741667	0.797861	0.576627	0.756837	0.271846	0.185808	0.8251	0.647839	0.711744	0.290489	1.04086	1.09703	0.343046	0.879984
0.0758333	0.972221	0.593711	0.449114	1.23001	2.2606	1.13159	-0.00742364	0.825519	0.162324	0.263094	0.787842	0.953516	0.809345		0.0758333	0.877001	0.889514	0.814404	0.260596	0.91954	0.5472	0.862178	1.70119	0.474363	0.180662	0.703963	0.757359	0.507926		0.0758333	0.222811	0.498256	1.05898	0.410556	0.201657	0.456081	1.21889	0.41453	0.772662	0.699916	1.18669	0.652656	0.316494
0.0775	0.907701	0.542639	0.628163	0.76714	-0.0852697	0.96676	0.619085	1.49195	0.975288	0.718081	0.993029	1.0823	0.644012		0.0775	0.583065	1.3335	0.847023	-0.192623	0.645772	0.967021	1.24734	0.486559	0.526682	0.588108	0.891246	0.84701	0.815286		0.0775	1.02953	0.761505	0.716906	0.395628	0.43382	0.692206	0.783175	0.591509	0.359311	0.928379	1.23271	0.278838	0.213619
0.0791667	0.748943	0.527048	0.360732	0.874642	0.891797	1.86276	0.983143	1.17289	0.616677	0.0633192	1.24166	0.388895	0.459488		0.0791667	0.688159	0.760819	0.832771	0.100226	0.460193	1.02334	2.07333	0.191577	0.696938	0.604209	1.23131	0.915669	1.1678		0.0791667	0.725212	0.993306	0.416243	0.501985	-0.053823	0.625078	0.261465	0.596214	0.934153	1.19996	1.79582	0.5662	1.42546
0.0808333	1.05365	0.785679	0.780964	1.20004	0.792595	1.25324	1.56705	1.17866	0.67	0.62888	0.840177	0.656858	1.16164		0.0808333	0.51258	1.28828	0.340919	0.354688	0.940655	1.12675	1.12407	0.835475	1.20126	0.844361	0.39167	0.48576	1.13341		0.0808333	1.00678	0.543512	1.19417	0.552293	0.255926	0.729473	0.520994	0.39358	0.583294	0.69345	1.00467	0.46589	0.704494
0.0825	0.906538	0.771911	0.808358	0.912766	0.446114	1.74335	2.05528	1.02482	0.255987	0.556254	0.865747	0.600099	1.03297		0.0825	0.43172	2.09529	0.876405	0.604995	0.664068	0.615475	0.66204	1.03335	1.12788	0.754868	0.9603	1.11988	0.678512		0.0825	0.880858	0.226771	1.10914	0.456278	0.708761	0.768393	0.953586	0.712153	0.219778	0.700106	1.40748	0.255558	0.829499
0.0841667	1.88268	0.678872	-0.17137	0.937187	0.528098	0.938067	1.28576	1.48368	0.606208	0.494091	1.17052	0.662096	0.492071		0.0841667	0.739332	1.10475	0.423748	0.214394	0.63437	0.478624	0.923064	2.10987	0.840107	0.338457	1.02099	0.850198	0.67639		0.0841667	0.292826	0.601273	0.805136	0.618891	0.735534	1.0448	1.00547	0.730978	1.14984	1.15773	1.98262	0.237637	0.760677
0.0858333	0.797781	0.504106	0.0498229	0.71836	1.41341	1.23193	1.56279	1.10417	0.266517	0.347279	1.5065	0.451914	0.651466		0.0858333	0.620919	0.865053	1.6071	0.799389	0.455166	1.09733	0.666569	0.626257	0.734738	0.595434	1.01281	1.01944	1.03585		0.0858333	0.503602	0.411024	1.82335	-0.1697	-0.31248	0.213502	0.694951	0.773778	0.552795	1.03375	1.81536	0.492326	1.07756
0.0875	0.863971	0.52646	0.236764	0.993392	0.679974	0.856915	1.11077	1.50532	0.111515	0.529618	1.13004	0.88096	0.809423		0.0875	0.737799	0.493448	0.854233	0.961995	0.895908	1.16887	0.951652	1.10667	0.604507	0.789846	0.364979	1.56756	0.764743		0.0875	0.537033	0.213648	1.36941	0.263382	0.506124	1.08331	0.520302	0.414043	0.571023	0.400775	1.43839	0.507614	1.36697
0.0891667	1.421	0.493594	-0.081746	0.636929	0.0930243	1.332	0.804418	1.28527	0.724675	0.446655	0.886908	0.632029	0.761681		0.0891667	0.427661	0.517062	0.645925	0.361142	0.899762	0.600741	1.28319	0.421559	1.08864	0.74	1.25321	1.03033	0.889738		0.0891667	0.654642	0.864286	1.53591	0.922207	0.655962	0.51893	0.794664	0.973668	0.719457	1.28219	2.19308	0.638067	1.26278
0.0908333	0.815688	0.474667	0.778826	0.749417	0.396149	1.21539	0.702285	1.50969	0.677325	0.557517	1.64013	0.729669	0.819107		0.0908333	0.482139	0.890637	0.367934	0.693126	1.17431	1.24134	0.238044	0.699289	0.968033	0.71398	0.904521	1.61169	1.01854		0.0908333	0.779423	0.653209	1.95412	0.298973	-0.788425	0.74066	1.02871	0.715106	0.808318	0.0894434	0.825819	0.316683	1.01275
0.0925	1.56937	0.476799	0.240344	0.921284	0.58795	0.970451	0.865251	1.64511	0.222521	0.143208	1.23069	1.28639	0.877424		0.0925	0.241525	0.673367	0.640861	0.677888	1.00072	0.570475	0.381445	0.990571	0.591341	1.07574	1.2171	1.34349	0.727709		0.0925	0.880441	0.857357	2.1494	0.67625	-0.0369421	2.24403	0.248708	0.579959	0.360335	0.369686	1.36829	0.309968	0.994814
0.0941667	0.772977	0.971636	0.38916	1.22906	0.506082	1.48307	1.12753	1.25947	0.774848	0.165837	0.56243	0.356976	0.938506		0.0941667	0.667298	0.704545	0.517643	0.0813383	1.2201	0.85623	0.755874	1.16502	0.448775	0.835932	0.825172	1.14292	0.93881		0.0941667	0.795071	0.911596	0.176183	-0.349819	-0.0615468	0.876309	0.177534	0.873172	-0.078341	1.09728	2.03019	0.18423	1.02866
0.0958333	0.271814	0.6788	0.900078	0.980601	0.0983175	1.0013	0.545941	1.47843	0.855938	0.519319	0.937422	1.36187	0.99932		0.0958333	0.108601	0.0365764	0.601537	0.761871	0.7363	1.49699	0.60672	0.873656	0.972084	-0.0929901	0.445157	1.63904	1.04875		0.0958333	1.22148	2.00675	1.22727	0.564911	0.593075	0.609371	1.01946	0.529015	1.27326	1.0091	2.39712	0.429166	1.04684
0.0975	0.962094	0.823393	0.424002	0.547729	0.0138915	1.36129	0.448975	1.10343	0.653411	0.453814	1.28132	0.899024	1.00547		0.0975	0.516796	0.750328	0.676647	0.554184	0.519481	0.332995	0.104648	0.504269	0.524967	0.631321	0.431044	1.32337	0.832639		0.0975	1.31746	0.491464	2.00267	0.119658	-0.278511	0.582336	1.27657	0.444219	0.14835	0.932687	1.50534	0.550843	1.33191
0.0991667	0.651915	0.977398	0.235987	1.27936	0.096526	1.52008	0.515213	0.843066	0.168037	0.287811	1.08516	0.976962	0.421679		0.0991667	0.650837	0.306308	0.803519	-0.0759686	0.534814	0.865874	0.481605	0.992157	0.67629	0.869408	0.750944	1.13052	1.11349		0.0991667	0.490131	0.669431	0.94295	0.312199	0.419427	0.729298	0.697683	0.400623	0.194192	0.712234	1.14183	0.10964	1.54099
0.100833	1.52367	0.715483	0.397593	1.07654	-0.148845	0.75448	0.671654	1.26329	0.869826	0.538938	1.1637	0.783418	0.899083		0.100833	0.505261	1.12483	0.869344	0.653252	0.635366	1.04974	0.607381	0.86141	0.683644	0.60708	0.968115	1.00702	1.00207		0.100833	0.896763	0.783517	0.707776	0.205001	0.369981	0.746564	1.04149	0.546544	0.699163	0.618968	1.77092	0.23996	0.803166
0.1025	1.13412	0.565433	0.364138	1.02525	0.326543	1.36475	0.706521	1.69663	0.358472	0.710026	1.08816	0.907915	0.68398		0.1025	0.408444	0.771881	0.69766	0.672386	0.715594	1.2187	0.689525	0.620274	0.638678	0.706447	0.829278	0.858069	1.03526		0.1025	1.01739	0.725349	0.669266	0.816884	0.28368	0.887469	0.418759	0.400534	0.0200179	0.487771	1.5491	0.44779	0.938787
0.104167	0.469641	0.427004	0.89632	0.748404	0.709921	1.87938	0.770956	1.34353	0.0975326	0.165748	1.46537	1.00154	0.823167		0.104167	0.889581	0.622545	0.735696	0.454203	0.582952	0.895472	0.792823	1.06868	0.687185	0.467732	0.571529	1.73129	0.768328		0.104167	0.297326	0.697274	1.92822	0.136607	0.0672654	0.627964	1.10193	0.127978	0.558266	0.904241	1.41411	0.303727	0.751391
0.105833	0.79468	0.441473	0.969825	0.778446	0.636616	1.30327	1.01228	1.2702	0.260721	0.316276	1.25875	1.15636	0.81789		0.105833	0.578022	1.09156	0.727615	0.9992	0.664383	1.44849	0.958973	0.401376	0.534051	0.442774	0.93015	0.771424	1.07451		0.105833	0.668449	0.899713	1.67046	0.576657	0.41641	0.908748	1.05064	0.454851	-0.109199	0.837989	1.02914	0.891673	1.63342
0.1075	0.714297	0.228467	0.534078	0.902527	0.370541	1.48018	0.663755	1.23572	0.0995623	0.793419	0.8466	1.05185	0.652486		0.1075	0.716939	0.457422	1.08608	0.345329	0.449332	1.33763	1.04467	1.09311	0.907628	0.790649	0.743023	1.1003	0.860197		0.1075	0.325286	0.300468	1.36193	-0.145638	0.692104	0.777454	0.740318	0.433915	0.365498	0.538415	1.36609	0.182615	1.15161
0.109167	1.40066	0.304272	0.766784	1.22918	0.495751	1.2849	0.622077	0.852834	0.91258	0.289376	1.10796	0.674734	0.816642		0.109167	1.22923	1.45552	0.63284	0.184463	0.354773	1.75518	1.00203	1.256	0.772362	1.1123	0.573504	1.88337	0.519642		0.109167	0.341111	0.560466	0.282975	1.36501	0.263246	1.00498	1.33702	0.548258	0.410469	0.766479	1.24612	0.290927	1.1579
0.110833	0.842627	0.398833	0.564497	0.641408	0.358854	1.0275	0.676035	1.66168	0.806819	0.391293	1.05756	0.679527	0.357526		0.110833	0.765342	1.36712	0.751895	0.698486	0.432274	1.33454	2.22552	0.777871	0.609846	1.0824	1.57397	1.10285	1.13426		0.110833	0.449598	0.662676	0.635077	0.338375	1.17017	0.832512	0.692429	0.418152	1.05935	0.815661	1.39076	0.189072	0.707456
0.1125	0.444503	0.532547	0.869908	1.09637	-0.397051	1.04506	0.539078	1.26588	-0.0506656	1.00847	0.574419	0.999088	0.711498		0.1125	0.595061	1.45907	0.754684	1.39593	0.494907	0.481513	0.7538	1.14247	1.04307	0.797445	0.600601	0.835932	0.444774		0.1125	0.506775	0.326094	0.724435	0.318896	0.388882	0.431984	0.574362	0.581834	0.862982	1.11384	1.38975	0.349063	1.37657
0.114167	0.684237	0.753785	0.301528	0.864865	0.647341	1.25468	0.884842	1.68613	0.407208	0.372524	0.972069	0.781322	0.581458		0.114167	0.379931	1.09174	1.42244	0.407769	0.759766	0.587681	0.6256	0.816007	0.90433	0.574633	0.821675	1.08298	1.30958		0.114167	1.12591	0.53632	0.335689	1.15711	0.0725641	0.800607	0.599343	0.795316	0.0756158	0.457341	1.62633	0.318993	0.945237
0.115833	1.15861	0.599405	0.562053	1.02835	0.504692	1.52191	1.95467	1.38301	0.624781	0.162288	0.829064	0.751531	0.620142		0.115833	0.527862	0.665695	0.729535	0.734275	0.301341	0.796459	1.65282	0.56337	0.698324	0.0333985	0.624721	1.78892	0.859161		0.115833	0.686326	0.692671	0.820901	0.695447	0.573811	1.10051	0.143762	0.503944	0.642143	0.876162	1.13507	0.415228	0.45849
0.1175	1.08187	0.333514	1.01644	0.62048	0.699727	1.32171	0.795515	1.49643	0.579576	0.548743	1.24686	0.718665	0.419333		0.1175	0.644401	0.398397	0.882499	0.722221	1.01892	1.25137	1.00509	0.598963	0.656126	0.381096	0.638216	1.23069	1.13529		0.1175	0.738517	0.856183	0.741895	1.05444	-0.579485	0.817433	1.07478	0.429074	0.308376	0.482736	1.59597	0.312479	0.6883
0.119167	0.922532	0.60515	0.37034	1.4614	0.215445	1.51729	1.18051	0.888081	0.156193	0.446293	0.969953	1.3415	1.08659		0.119167	0.716573	0.518808	0.427551	0.862236	0.406122	0.811278	0.652632	0.727116	0.996555	0.755325	0.71009	1.06139	1.03095		0.119167	0.89662	0.350332	1.25744	0.348979	1.06963	0.69893	0.838707	0.825208	0.892662	0.559858	1.45294	0.60406	1.16576
0.120833	0.704592	0.507171	0.0239874	1.22488	0.360604	2.14951	0.718665	1.7507	0.28543	0.738689	1.02045	0.69768	1.39063		0.120833	0.621159	0.448689	0.39537	1.24343	0.960254	0.77715	1.07801	1.42819	1.07991	0.519952	0.762793	0.871233	0.880466		0.120833	0.71158	1.15448	1.58624	-0.119571	0.0863795	0.770218	0.0470966	1.1295	0.487509	0.403506	1.50679	0.239636	0.701367
0.1225	1.35859	0.703351	0.301222	0.683892	-0.00849509	1.54756	1.39395	0.882409	0.370143	0.534067	1.10074	0.930233	1.1084		0.1225	0.694348	0.685346	0.627027	0.567125	0.891321	1.80469	0.750995	0.355918	0.277576	0.905596	0.930676	1.16464	1.04152		0.1225	0.646233	1.12959	1.00467	0.462019	0.648416	0.858001	1.04196	0.771741	0.581704	0.587159	1.3918	0.199238	0.595584
0.124167	1.21052	0.692448	0.276255	0.713521	0.15591	0.53877	1.45023	1.38041	0.00997615	0.70959	1.29629	1.1332	0.540494		0.124167	0.460734	0.635484	0.721884	0.666097	0.401819	0.485916	0.951877	0.363636	0.552005	1.10673	0.730664	1.17052	1.42921		0.124167	0.786576	0.642008	0.887544	0.343457	1.02805	0.260061	0.825813	0.807247	0.244128	1.19292	1.06743	0.297196	0.80733
0.125833	1.62467	1.0315	0.196044	1.21457	0.436442	1.58506	0.774265	1.66677	0.987135	0.653902	0.996269	0.640898	0.760831		0.125833	0.708403	1.13888	0.252717	0.482612	0.444266	1.0468	0.473577	0.358407	1.06995	0.624467	1.08741	0.995627	1.37198		0.125833	0.336602	0.493806	1.02416	0.248024	0.285512	0.582173	1.12254	0.758758	0.507472	0.932306	1.68314	0.806325	1.97754
0.1275	2.76773	0.482929	0.678291	0.607494	0.464471	1.45961	1.28619	0.926101	0.766673	0.551467	1.09258	0.377266	0.672977		0.1275	0.612287	0.594994	0.996206	0.901309	0.944208	1.8016	0.164237	0.461897	0.920079	0.483065	0.757559	0.94944	0.966931		0.1275	1.31079	0.827296	1.05559	-0.0105264	0.26335	0.256756	1.3244	0.428062	0.605789	0.33122	1.46419	0.728606	0.950158
0.129167	1.27292	0.961617	-0.191133	1.23265	0.455055	1.29306	1.37116	1.75949	0.253316	0.490939	0.716099	0.920145	0.623053		0.129167	0.5084	0.835858	0.94453	0.387474	0.628852	1.56168	0.640437	1.14457	0.505061	0.747209	1.19727	1.30805	0.965767		0.129167	1.45874	0.355366	0.300279	0.240615	0.24325	0.770637	0.766034	0.538329	0.38846	0.990077	0.721046	0.449661	1.06524
0.130833	0.0043807	0.932229	0.669486	0.495487	0.525359	1.36884	1.14203	1.30504	-0.121947	0.293735	0.977829	1.0117	0.814664		0.130833	0.176983	0.74048	0.186889	0.702806	0.295209	0.821893	0.503155	1.07389	0.443815	1.1944	0.529011	1.96616	0.924314		0.130833	2.19868	0.426376	0.975807	0.0124446	-0.02349	0.944536	0.41734	1.30466	-0.14928	0.91823	1.71862	0.670053	0.688179
0.1325	0.919742	0.893598	0.393607	0.652075	0.645048	1.06842	0.365668	2.5174	0.00858366	0.607941	1.59529	0.626566	0.693812		0.1325	0.675234	0.569386	0.72456	0.255112	0.843935	0.369171	0.487453	0.804662	0.696511	1.15599	0.967867	0.559602	0.903418		0.1325	0.61689	0.589442	0.581549	0.537704	0.558064	0.925109	1.30629	0.837872	0.2369	0.539932	0.788963	0.558098	0.711883
0.134167	1.942	0.344219	0.809343	0.35724	0.235739	1.32976	0.657584	1.6281	0.573798	0.825746	0.944064	0.552242	0.618416		0.134167	0.882034	0.700966	0.879176	0.393773	0.499646	0.602598	0.658426	1.42361	0.837917	0.575768	1.00698	1.17736	1.13077		0.134167	0.56813	0.776225	0.137393	0.0101662	0.526806	0.877597	0.203027	0.777778	-0.276363	0.445549	1.18035	0.1931	1.08329
0.135833	0.614788	1.28235	0.551709	1.23813	0.0290176	1.45263	0.469658	1.90051	0.365724	0.539184	0.832053	1.10225	0.789658		0.135833	0.719377	1.00642	0.960414	1.02277	1.20322	0.454751	0.627038	1.48277	0.948167	0.616742	0.887449	1.69861	0.73582		0.135833	0.93323	0.229257	0.554263	0.63869	0.339523	1.18417	0.53351	1.52487	0.6452	0.873342	1.107	0	0.37726
0.1375	0.909707	0.771558	1.0047	0.63558	0.359224	1.60842	1.13541	1.57441	0.325985	0.532085	0.821142	0.656025	0.636859		0.1375	0.725323	1.43949	0.720162	0.837747	0.273213	0.567496	0.67712	0.577564	0.805569	0.543348	1.1298	0.728176	1.45216		0.1375	1.70408	0.456135	0.940665	0.668509	1.42411	0.667988	0.727078	0.944619	0.393922	0.637001	1.17324	0.0656728	0.751697
0.139167	1.09472	0.365038	0.704342	0.923917	0.070399	1.28652	0.861369	1.21997	0.815917	0.626012	0.938556	0.771588	0.62644		0.139167	0.562076	0.709972	0.913727	0.705306	0.79473	1.03933	0.880023	1.04281	0.509359	0.601161	0.655183	1.12806	1.42785		0.139167	0.81135	0.993217	0.817521	0.618647	0.130338	0.56812	0.355072	0.491126	0.808164	0.965096	1.21156	0.0662896	0.690821
0.140833	1.30976	0.505892	-0.336107	0.649252	0.506166	1.13344	0.845617	1.02331	0.191794	0.232583	1.03323	0.97616	0.752396		0.140833	0.88618	1.95589	0.746651	0.784515	1.18353	0.488222	0.843117	1.4554	0.832206	1.16608	0.898623	1.12363	1.10466		0.140833	0.453782	0.409306	1.072	0.678209	0.463764	1.19617	1.17912	0.479825	0.3125	0.738774	2.04072	0.375932	1.09949
0.1425	0.639833	0.676647	0.416995	1.07752	0.444923	0.782408	0.773773	1.91692	0.601979	0.407612	0.907786	0.791323	0.944125		0.1425	0.587954	0.336486	1.04393	0.789719	0.51349	0.604962	0.297493	0.98263	0.712504	1.04181	1.09881	1.47667	1.07371		0.1425	0.181045	0.134983	1.14175	1.47056	0.496318	1.05189	0.863691	0.217316	0.787014	0.675534	1.97062	0.180652	0.775705
0.144167	0.344679	0.951013	0.611498	1.23273	0.153411	0.960163	1.02478	1.5488	0.266495	0.588978	1.07763	0.623136	0.594682		0.144167	1.01124	1.80259	0.642545	1.95845	0.576517	0.547919	0.671723	0.854897	1.23762	0.872247	0.947296	1.02552	0.347819		0.144167	0.44016	0.515818	0.471341	0.380101	0.441478	0.609982	0.415043	0.414232	0.669978	1.03299	1.1193	0.417133	0.603798
0.145833	1.00985	1.02485	0.798405	0.766186	0.0318497	1.4791	1.98143	1.60889	0.0128361	0.38055	1.51897	0.651466	0.597282		0.145833	0.574945	0.434841	0.581897	0.704202	0.23001	1.01229	0.476467	0.126461	1.17776	0.896603	0.906462	1.11794	0.807875		0.145833	0.995585	0.594328	0.330358	0.564325	0.284262	0.705079	0.679386	0.866917	1.9931	1.33278	1.1588	0.283366	0.770829
0.1475	1.25332	0.87834	0.523409	0.8983	0.785956	1.50777	0.361346	1.09984	0.431743	0.485109	0.937695	0.704017	0.661955		0.1475	0.672655	1.18586	0.77048	0.547372	0.671535	1.23082	1.25483	1.28331	0.928721	0.739541	1.17323	0.604278	0.247985		0.1475	0.760643	1.14042	0.677744	-0.0238934	0.457494	0.735622	0.701831	0.749064	0.895755	0.528723	0.986237	0.311672	0.807641
0.149167	1.42288	0.341632	0.579914	0.992342	0.12539	1.1391	0.433105	1.34664	-0.0786884	0.346677	0.935732	0.615994	0.561508		0.149167	0.841863	0.331052	0.484741	0.193852	1.04775	0.542185	0.501548	0.317881	0.503926	0.288687	0.662705	1.58691	0.801109		0.149167	0.935725	0.365246	1.30145	0.909037	0.00307441	0.551329	0.132963	0.864973	0.442024	0.663922	1.43837	0.446486	0.361515
0.150833	0.425896	0.31295	1.17498	0.657644	-0.0381074	1.33738	0.468028	1.2669	0.577724	0.040909	1.64703	0.958944	0.778539		0.150833	0.640498	0.516442	0.934871	0.539119	0.673401	0.773353	1.01344	0.827597	1.11258	1.1147	1.1491	1.29885	1.20919		0.150833	0.924048	0.541313	0.568241	1.47571	0.0176201	0.67978	0.246419	0.500283	0.519456	0.421832	1.3708	0.154891	1.14105
0.1525	1.28857	0.700771	0.824818	0.822629	0.445941	1.53362	0.238262	1.64426	0.522658	0.663584	0.752288	0.840937	0.841115		0.1525	0	1.31472	0.589077	1.18447	0.766055	1.86799	0.192316	0.309472	0.958613	0.0663254	0.98299	0.0121458	1.03301		0.1525	0.898452	0.642614	0.102466	0.391327	0.715016	0.406035	0.436401	0.744032	0.234673	0.658986	1.63369	0.302017	1.01325
0.154167	1.08221	0.545588	1.03769	0.798584	1.37788	1.38839	1.18147	1.51209	0.121822	-0.0409576	1.64697	1.11212	0.812241		0.154167	0.57554	0.577556	0.333667	1.10912	1.02831	0.595309	0.499823	1.35895	0.635389	0.825412	1.02604	0.796505	0.980781		0.154167	0.933002	0.670916	0.907859	0.338973	0.23164	0.311201	1.10507	1.15939	0.913391	0.731596	1.42336	0.546508	1.07424
0.155833	1.25912	0.411624	0.320404	0.580155	-0.161368	0.745666	0.626418	1.35705	1.00929	0.523472	0.978328	0.751797	0.384829		0.155833	0.656361	0.718609	0.642495	0.469353	0.495401	0.80307	0.452852	2.06	0.712027	0.753973	0.966723	0.68404	1.05301		0.155833	0.489716	0.44486	1.32819	0.367564	1.00146	0.480318	0.0535557	0.98464	0.61273	1.22492	1.11247	0.41213	1.06428
0.1575	0.607784	0.583942	0.505473	1.17313	0.442855	1.29568	0.728111	0.758943	0.703473	0.626292	1.39982	0.746531	0.698147		0.1575	0.910589	0.848045	0.328034	0.254548	0.688418	0.851334	0.636956	0.705299	0.865088	0.624418	0.681344	0.79663	0.443253		0.1575	0.34343	0.878245	0.987594	0.616162	0.201078	0.310883	0.693099	0.805221	-0.351562	0.556805	1.23637	0.684674	1.09137
0.159167	1.20528	0.438688	0.557902	0.616562	0.504794	1.63993	1.19113	1.6749	0.677958	0.502386	0.885625	0.905674	0.496825		0.159167	0.795404	0.682068	0.64233	0.540896	0.302187	0.575257	0.658504	1.34697	1.02676	0.173509	0.470921	0.875293	1.47858		0.159167	0.419121	0.730567	1.06294	0.511635	0.370844	0.817556	1.3806	0.777001	0.119718	0.507659	1.76029	0.265722	0.281394
0.160833	0.271066	0.422003	0.172281	0.911287	0.692702	1.64745	0.162646	1.84397	0.373037	0.481061	0.765322	0.786906	1.16317		0.160833	0.221239	0.72283	0.536913	0.741575	1.08284	0.651384	0.320718	1.16692	1.06639	0.874986	0.649718	0.803071	1.03804		0.160833	0.888928	0.46489	1.11794	0.320306	0.130064	0.936409	0.86496	0.701262	0.363636	1.13998	1.94404	0.532481	1.02557
0.1625	1.54717	0.777366	0.648733	0.592066	0.0783299	1.16857	1.13711	1.43436	0.242388	0.568804	1.1148	1.1453	0.303444		0.1625	0.776156	0.881121	1.01516	0.313129	0.80045	0.642288	0.743526	0.74746	0.73772	0.112226	0.679737	0.901984	0.74545		0.1625	0.861463	0.67014	0.491408	0.500946	-0.203893	1.18263	0.501207	0.481759	1.0708	1.04252	1.81472	0.260055	0.805879
0.164167	0.839572	0.634713	0.741478	0.547945	1.16148	0.766744	1.09218	1.29735	0.0708182	0.438258	0.96678	0.503767	1.33278		0.164167	0.636901	0.888354	0.825275	0.435519	0.316022	0.735628	0.648088	1.09347	0.40285	0.558948	0.529054	1.49615	0.776699		0.164167	0.527559	0.427497	0.78914	0.294672	-0.098078	0.769264	0.814561	0.855688	0.526414	0.806434	1.56834	-0.0227661	0.355044
0.165833	0.688583	0.392546	0.673999	0.923497	0.520202	0.820109	0.850774	0.9235	0.288007	0.554785	1.27708	0.693001	0.509814		0.165833	1.17506	1.05233	0.830211	0.259129	0.16811	1.05489	0.496063	1.23631	1.20056	0.205915	1.23688	1.4926	1.08896		0.165833	0.738503	0.636873	0.207287	0.10156	0.895713	0.576369	0.876623	1.06538	0.653993	1.40188	1.33437	0.385811	0.0711553
0.1675	0.748028	1.12156	0.52132	1.11325	0.561639	1.39173	0.994391	1.63329	0.323517	0.170405	1.78839	0.68087	0.774777		0.1675	0.314578	0.455694	0.972552	-0.013517	0.274569	1.12531	0.525387	0.974758	0.939504	0.864153	0.637999	0.934693	0.756605		0.1675	0.506162	0.676693	0.663113	0.390077	0.540861	1.19716	0.787764	1.13458	0.29491	1.18961	0.881486	0.370944	0.813692
0.169167	1.09227	0.467052	0.140079	0.65621	0.221829	0.998461	1.71706	0.767771	0.702818	0.189111	1.29083	0.92985	0.245322		0.169167	0.732552	0.691082	0.833224	-0.284723	0.72644	0.923321	0.541418	0.271761	0.412856	1.36261	1.20602	0.590679	1.40321		0.169167	0.661055	0.822173	1.66637	0.586723	0.379057	0.750829	0.494003	0.48692	0.435625	0.421239	1.68792	0.352291	1.0179
0.170833	1.04508	0.727699	0.76567	1.06383	0.338196	1.51429	0.930542	1.26879	0.676464	0.587914	0.793121	0.774044	0.682914		0.170833	0.680347	0.75369	0.919601	-0.15487	0.589378	0.519427	1.16557	0.849411	0.829377	1.6409	0.948992	1.05159	1.14938		0.170833	1.31861	0.647423	1.76081	0.987384	0.0313605	0.915392	0.887289	0.763634	0.681044	0.905797	1.72212	0.363706	0.41868
0.1725	1.73389	0.96323	0.512605	0.846134	0.182616	0.957037	1.21887	0.887824	-0.0295672	0.698043	0.844421	0.931553	0.98451		0.1725	0.631135	0.744449	0.720933	0.331974	0.354736	0.858939	1.09177	1.25353	0.845594	1.13364	1.3703	0.98616	1.18758		0.1725	0.745859	0.136765	1.47288	0.499312	0.519574	1.61301	0.218378	0.767672	0.68653	0.70485	1.17355	0.152449	0.447671
0.174167	1.92289	0.697335	0.170521	0.789771	0.0540512	1.01031	0.594428	1.41252	0.708452	0.631845	1.45474	0.678827	0.547249		0.174167	0.474984	0.687219	0.846418	0.269773	0.88364	0.456205	1.16274	-0.0566847	1.00408	0.0672595	1.37301	0.370094	1.11379		0.174167	0.372089	0.540389	0.593042	0.523072	0.129216	0.856653	1.60836	0.737127	0.277665	0.869391	1.55107	0.727273	0.930704
0.175833	0.602599	0.921331	0.0787952	1.01402	0.150165	1.37192	1.01237	1.24673	0.738446	0.509219	1.09888	0.635714	1.31631		0.175833	0.42479	0.983415	0.955131	0.376594	0.456869	0.816306	0.144889	1.92047	0.71097	0.926698	1.18978	0.908991	1.21349		0.175833	0.705156	0.380449	1.13685	0.509629	0.358415	0.915556	0.735882	0.327068	0.534448	0.930707	1.67914	0.132808	0.967031
0.1775	1.32638	0.929983	1.12369	0.487113	0.904295	1.00027	0.303252	1.96292	0.650165	0.551144	0.85117	0.666925	0.850672		0.1775	0.912607	0.89814	1.53492	0.216239	0.819478	1.16791	0.876717	0.34632	1.06374	1.53928	1.38362	0.522006	0.706493		0.1775	1.0319	0.493484	0.799887	0.331115	0.586367	0.379126	0.340812	0.82069	0.603206	0.887548	1.13824	0.465384	0.686161
0.179167	0.883078	0.718649	0.299338	1.17997	0.225423	0.960254	1.12582	1.53956	0.490648	0.277221	1.08926	0.781827	0.641366		0.179167	0.977886	0.519529	0.733328	0.190004	0.700176	0.948584	0.621929	1.0406	0.820655	0.938842	1.21782	0.560563	0.783983		0.179167	0.641664	0.560651	1.01272	0.41089	0.460443	0.839842	0.852472	0.68964	0.0880446	0.821468	1.12016	0.152101	-0.0938902
0.180833	1.49884	0.812249	0.389542	1.61079	0.339533	1.57895	1.07213	1.3247	0.479598	0.22988	1.44539	1.02905	0.129391		0.180833	0.693331	1.09099	0.628246	1.28622	0.686209	0.605489	0.443581	1.53003	0.603764	0.938638	0.854362	0.744374	1.20355		0.180833	0.694324	0.560023	1.34388	0.742273	0.811614	0.427881	1.32824	0.722939	0.681501	0.302781	1.6612	0.0437158	2.63644
0.1825	1.63309	0.960936	0.304494	0.87777	-0.313434	1.47403	0.932227	1.35138	0.24342	0.332385	1.26951	0.985891	0.976647		0.1825	1.16857	1.70068	0.154669	0.813354	0.541231	0.288772	0.36036	0.952268	0.603752	0.982858	1.35567	1.18461	1.06115		0.1825	0.530088	1.04533	1.98418	0.427285	0.0832736	0.538793	1.3169	0.670531	0.543142	1.00467	1.37024	0.235869	0.0955782
0.184167	1.2096	0.652	0.571881	1.07786	0.239462	1.03931	0.748104	1.33114	0.659166	0.331978	0.449688	1.08932	1.08347		0.184167	0.94464	1.00986	0.960123	0.352951	0.543036	0.475186	0.669863	1.14561	0.806647	0.533047	1.16344	1.2352	1.26135		0.184167	0.982941	0.575438	1.464	0.358901	0.0881659	1.63683	0.838352	0.58496	1.01976	0.479491	1.57736	0.34735	0.589892
0.185833	0.591946	0.715338	0.187205	1.00773	0.829607	1.22679	1.14861	1.35327	0.488341	0.570017	1.34856	0.675676	0.649056		0.185833	0.510725	0.927953	0.69116	-0.265893	0.770515	0.561872	0.712997	1.01059	0.678259	0.140106	0.735634	0.596256	0.948024		0.185833	1.19573	0.560563	1.1818	0.537639	-0.251022	1.13175	0.673825	0.497685	0.105236	1.00902	2.02848	0.654836	0.680782
0.1875	1.18554	0.58715	0.324849	0.843389	0.273542	1.33679	1.32157	1.17567	0.143207	0.313336	1.72103	0.89434	1.04451		0.1875	0.550916	0.163037	0.642894	0.35091	0.492189	0.981937	0.726682	1.53268	1.33509	0.819338	0.439156	0.947743	1.38016		0.1875	0.494634	0.607752	1.05161	0.219674	-0.207319	0.552193	0.465715	0.504414	-0.288082	0.407332	2.05362	0.721185	0.580825
0.189167	0.611706	0.551198	0.14071	0.52208	0.529543	1.57239	0.762928	1.15696	-0.220337	0.543888	1.47455	0.76842	0.694852		0.189167	0.759417	0.113633	1.24096	0.3929	0.797632	1.77957	1.17706	0.692943	0.396089	0.994467	1.16392	0.939359	0.951731		0.189167	0.455611	0.653666	0.662688	0.463042	-0.388132	0.541618	0.823273	1.13604	0.85685	0.895977	0.955171	0.452615	0.300806
0.190833	0.730469	0.457637	1.11407	1.16042	1.21362	0.945102	1.12055	1.59143	0.0197006	0.611505	1.39984	1.14669	0.710558		0.190833	0.648973	1.22118	0.974494	0.770686	0.387313	0.410131	0.458057	0.769224	0.817679	0.871853	0.794813	0.847431	0.568043		0.190833	1.17405	0.923619	0.422812	0.396648	0.845289	0.318986	1.02252	0.657289	0.459536	0.374144	1.23241	0.399336	0.886833
0.1925	1.11051	0.332288	0.0156409	0.67381	0.82433	0.553415	0.888898	1.55101	0.152833	0.46234	1.82553	0.642788	0.155438		0.1925	0.570307	0.429882	1.25018	0.521459	0.349689	0.38714	0.641769	0.821455	0.734214	0.358667	0.535172	0.567916	0.71091		0.1925	0.743415	0.552698	1.24348	0.393265	0.928095	0.748903	2.03024	0.509492	1.7446	0.955284	1.67693	0.256591	0.908983
0.194167	0.691349	0.440741	0.015916	1.07994	-0.186413	1.07359	0.612203	1.4268	-0.0336774	0.443412	1.21936	0.820399	0.55571		0.194167	0.584062	1.0431	0.595124	0.218521	0.437991	1.08527	1.24452	0.858021	0.501463	0.565607	0.125452	1.01576	1.75217		0.194167	0.496793	0.520167	2.55143	0.345223	0.198976	0.518515	1.6304	0.934268	0.577462	0.770468	1.29282	0.333719	0.933191
0.195833	0.730104	0.68306	0.589825	0.65921	0.217324	1.1491	0.793186	1.49458	0.707468	0.864286	0.429378	0.620062	0.655308		0.195833	0.74908	0.676215	0.946114	0.426983	0.669483	1.2722	0.855432	1.02377	0.63932	0.581916	0.967198	0.979708	0.766712		0.195833	0.752205	0.198011	1.01328	0.123644	0.481957	0.259157	0.432665	1.00818	0.203133	0.489509	2.0267	0.364049	1.00337
0.1975	0.272896	0.736317	1.08144	0.576972	0.195447	1.51086	1.3264	1.13607	0.251796	0.424403	0.717239	0.806994	0.63842		0.1975	0.895099	0.533212	0.479316	0.824515	0.865501	0.940393	1.08269	0.473212	0.817747	0.725989	0.799613	0.881391	1.10413		0.1975	0.852031	0.459881	0.646518	1.14693	0.188364	0.98341	1.25305	0.548005	0.615756	0.839575	1.15322	0.324507	1.16237
0.199167	1.04478	0.674157	1.20449	1.3628	1.13292	1.4664	0.993645	1.8585	-0.278663	0.630636	0.716423	1.04908	1.14225		0.199167	1.06388	1.84661	1.10441	0.16603	0.870858	0.728667	0.833768	1.1835	1.13224	0.989881	0.922103	0.544581	0.971014		0.199167	0.466035	0.793738	1.13373	0.435531	-0.057991	0.563634	1.20521	1.18471	1.7927	1.01683	2.15401	0.535883	0.968461
0.200833	0.838546	0.857195	0.32908	1.10223	0.914597	0.903323	0.99605	1.54132	0.0260491	0.0622407	1.64352	0.777536	1.15803		0.200833	0.889506	0.967283	0.875713	0.748886	0.454329	0.873327	0.528296	0.746039	0.662115	1.14821	0.447752	1.27282	0.7922		0.200833	0.533986	0.607454	0.764369	0.440986	0.181469	0.302121	1.01261	0.787402	0.910139	1.07397	1.12745	0.0223164	0.696122
0.2025	0.695425	0.332116	0.296928	1.28934	0.0769886	1.02472	0.491503	1.2286	0.475202	0.475875	1.2245	0.971031	0.540528		0.2025	0.810195	0.920885	0.896113	0.0234104	0.531949	1.15834	1.02764	1.0853	0.481948	1.00866	0.248705	1.45581	0.93673		0.2025	0.720526	0.775862	0.835293	0.981862	-0.198692	0.934458	0.859468	0.685234	1.19575	0.654588	1.38178	0.454074	0.737715
0.204167	0.524291	0.771637	0.568783	0.778934	0.637462	1.35239	0.75062	1.02267	0.318779	0.103361	1.00389	0.657184	0.624906		0.204167	0.920252	1.07415	1.29465	0.497326	0.487422	0.971489	0.713177	1.29372	0.766633	0.380218	0.749079	0.0467039	0.754844		0.204167	0.953505	0.474854	1.03804	0.326005	-0.175441	1.17118	0.555109	0.885076	1.60733	0.803751	0.832366	0.409863	-0.149177
0.205833	0.869198	0.539665	0.527517	1.41563	0.0586866	0.937799	0.371348	1.53675	-0.0726621	0.461361	1.12098	1.03982	0.583254		0.205833	0.671622	1.08705	0.404988	0.356173	0.402858	0.217889	0.939477	0.480965	0.727061	0.308955	1.12041	0.814352	0.485358		0.205833	0.493384	0.464643	1.25695	0.570588	0.584057	0.557677	0.551156	0.564604	0.233439	0.56993	1.24549	0.410385	0.566053
0.2075	1.06475	0.331325	0.195279	1.38637	1.72451	1.34765	0.447298	1.16099	-0.14768	0.615044	0.90092	0.646917	0.900525		0.2075	0.796143	0.825354	0.821035	0.756911	0.436024	0.91774	0.818582	0.953628	1.27195	0.482763	0.777278	1.19444	0.776512		0.2075	0.752013	0.723589	0.147106	0.21274	0.249607	0.931927	0.407279	0.622705	0.100473	0.612064	1.26816	0.534485	0.508959
0.209167	1.45229	1.03917	0.303061	0.733106	-0.057427	1.6175	0.627611	1.06616	0.190526	0.255842	1.39346	0.716108	0.719198		0.209167	0.318486	0.609181	0.677951	0.862596	0.439483	0.389948	0.459089	0.551423	0.675333	0.639758	0.975817	1.08602	1.22689		0.209167	0.512558	0.613432	0.659176	0.28613	0.0934689	0.548486	0.673513	0.504053	0.477007	0.471409	1.51868	0.370346	1.12295
0.210833	1.31314	0.060962	0.27678	1.26513	1.02346	0.808223	0.551157	1.19436	0.655291	0.699079	1.04436	0.700502	1.1351		0.210833	0.799762	1.40134	0.87901	0.135463	0.368924	0.917845	1.29405	0.624695	0.669596	0.0126368	0.765811	0.753385	0.758917		0.210833	0.985884	0.887292	1.08236	0.538988	-0.0991639	1.18935	0.831336	0.406992	0.0869324	0.49456	1.33319	0.214215	0.45025
0.2125	0.853841	0.102828	0.541459	0.875638	0.256302	1.157	1.24881	1.41496	0.662073	0.50813	0.862724	1.02113	0.446927		0.2125	0.872561	0.854576	0.988822	0.316972	0.617481	0.946582	0.18718	1.01957	0.672255	0.504492	0.784164	0.965234	1.47101		0.2125	2.55504	0.706124	0.536638	0.310137	-0.107899	0.354508	1.07185	0.151253	0.102387	1.04609	1.08483	0.605877	0.72132
0.214167	1.20205	0.479927	-0.0977311	1.6859	0.403155	1.33626	0.812415	1.26514	-0.182201	0.523604	1.52491	1.02411	0.525371		0.214167	0.529905	1.20325	0.613757	1.15468	0.922628	0.706446	0.543785	0.419761	0.826446	0.435616	1.27783	0.811823	0.53097		0.214167	1.47679	0.595631	0.525165	0.709516	0.320056	0.823155	0.428695	0.835532	0.231444	0.770224	1.48993	0.345118	1.40353
0.215833	0.790212	0.972803	0.843911	0.72424	0.601866	1.53461	0.303558	0.7183	0.0660325	0.549079	0.713027	0.388119	0.683979		0.215833	0.872068	2.22439	0.878882	0.0589631	0.579424	1.06111	0.543876	0.753523	0.987411	0.0193459	1.24197	0.905611	0.745929		0.215833	1.15191	0.408857	1.75121	0.383126	0.375559	0.775795	0.716296	1.05438	0.396617	0.722087	1.04557	0.549683	1.04
0.2175	0.783298	0.488126	0.63652	0.714054	1.50599	1.37517	0.873496	1.25419	0.754874	0.805835	0.937578	0.849751	0.706907		0.2175	0.83463	1.21281	0.454319	0.658236	0.555284	0.227925	0.759814	0.905455	0.854024	0.482515	0.973751	0.991329	1.00665		0.2175	0.259765	0.712097	1.74668	0.358635	0.856517	0.868114	0.835259	0.870108	-0.0521108	1.15801	1.45588	0.195559	0.385431
0.219167	1.21435	0.448507	1.31461	1.01525	0.66611	1.43654	0.727298	0.921402	1.04018	0.207978	0.881575	1.37131	0.780745		0.219167	0.947611	1.14155	0.804978	0.623137	0.482573	0.443068	0.891103	1.476	0.960735	0.479451	0.827541	1.14098	0.997237		0.219167	0.838945	0.571014	0.684556	-0.13521	0.136447	0.71319	1.17777	0.910573	0.204239	0.619266	1.99395	0.580233	0.357027
0.220833	1.0313	0.6714	0.591582	1.18974	0.143212	0.848826	1.33205	1.97059	0.169543	0.0624909	1.36395	0.793161	0.609275		0.220833	0.958948	1.09786	0.302814	1.08333	0.382905	0.765326	0.36004	0.293877	0.747897	1.14509	0.838385	1.25064	1.02646		0.220833	0.653366	0.790514	1.15489	0.386263	0.123662	0.0656154	0.709548	1.01156	0.642971	0.576165	1.12934	0.458405	1.13344
0.2225	0.743404	0.329428	0.658625	0.726667	0.23199	1.953	1.0722	0.851647	-0.0985638	0.489653	1.02594	0.665425	0.609876		0.2225	1.21557	1.43953	1.13181	0.875935	0.782737	0.800813	0.902101	0.61214	0.672665	0.274518	0.50162	0.856971	0.972038		0.2225	0.400374	0.659603	0.0478007	0.415721	1.73768	0.863462	1.06553	0.644621	1.2319	0.718391	1.40634	0.256153	0.533774
0.224167	0.230243	0.614112	0.6548	1.0488	-0.106095	0.861363	1.22171	1.8964	0.296014	0.578943	1.00804	1.39589	0.709403		0.224167	0.605232	1.15886	1.10183	0.807626	0.495604	1.05748	1.14298	0.690251	0.820176	0.385986	0.706653	0.779433	0.577296		0.224167	0.733105	0.500598	0.250371	0.710237	0.0493432	0.23772	0.642432	0.458677	0.827257	0.365882	0.854888	0.429295	0.794595
0.225833	1.39427	0.660257	0.47104	0.586001	0.408029	1.09	0.700752	0.983158	0.000285864	0.557713	1.04611	0.633728	0.229047		0.225833	0.799378	0.682068	0.715789	0.47071	0.280941	1.12661	0.911917	0.987298	0.606352	0.290514	0.534257	0.870652	1.20402		0.225833	0.592728	0.822131	0.777928	0.985482	0.550729	0.954037	0.0917965	0.942527	0.100741	0.953444	1.09486	0.716006	1.1651
0.2275	0.591223	0.588605	0.300304	0.885472	0.325941	1.47306	0.939554	1.10884	0.411131	1.47632	1.04542	0.883692	0.834385		0.2275	0.645489	0.671827	0.91643	0.443938	0.826639	1.19293	0.480639	0.323627	0.509466	0.685175	0.641108	1.23769	0.704561		0.2275	1.11864	0.798119	1.6191	0.792421	0.565272	0.406974	0.987651	1.52108	0.266984	0.979694	1.62338	0.263296	0.627
0.229167	0.804441	0.576197	0.0716239	1.28605	1.2292	1.49998	0.917146	1.00549	-0.032683	0.245791	1.15148	0.86778	1.27416		0.229167	1.29334	1.02114	0.651777	0.512925	0.628825	1.43913	0.742191	0.87777	0.869817	0.601093	0.782473	0.287803	1.20213		0.229167	0.851346	0.935091	2.8103	0.562398	0.362072	0.145313	0.587799	0.254939	0.730703	0.866876	1.71125	0.319271	0.593747
0.230833	0.427702	1.25864	0.750897	1.2783	1.04157	1.39426	0.665051	1.94287	0.281459	0.6106	1.59412	1.01363	0.690116		0.230833	0.262289	0.474798	0.933687	0.766258	0.739958	0.468004	0.854482	0.34231	0.543842	1.56816	1.40401	0.067169	0.351		0.230833	0.541457	0.818754	1.16591	0.588426	-0.0175023	0.595542	0.698523	0.690161	1.42348	0.772422	1.04605	0.215745	0.865352
0.2325	1.23644	0.520812	0.641102	0.841624	0.432224	1.42447	0.475797	0.900515	0.36147	0.41289	0.756541	0.666311	0.866007		0.2325	0.339033	1.15905	0.377501	0.708051	0.987146	0.937122	0.801451	0.363873	0.962202	0.78674	0.680779	0.609229	0.801101		0.2325	0.477935	0.700875	1.07013	0.728907	0.92163	0.862255	0.596686	0.57981	0.235558	0.42288	1.59399	0.304454	0.928852
0.234167	1.31491	0.321066	0.109237	0.775486	0.0752389	1.37107	1.42316	1.51258	0.369692	0.866873	1.20969	1.04484	0.868923		0.234167	0.782949	3.83507	0.811758	0.476606	0.697487	1.32948	0.520931	0.604018	0.678297	1.28393	0.86259	1.20755	0.603613		0.234167	0.716531	0.365293	0.971159	0.349325	-0.336648	0.753029	1.13233	0.340912	0.762174	0.577624	1.28236	0.92562	0.495287
0.235833	1.22569	0.525391	0.189884	1.25835	0.954569	1.37076	0.305808	1.03344	0.102146	0.45907	1.38353	1.15702	0.828555		0.235833	0.999609	2.73485	0.440086	0.378842	-0.127687	0.798138	0.604948	1.22899	1.10118	0.823695	0.532447	0.398631	1.11955		0.235833	0.684728	0.788459	0.700421	0.966381	0.302483	0.651848	0.284368	1.25487	0.615685	0.618416	1.55854	0.281051	1.08827
0.2375	0.323909	0.750264	0.710151	0.951535	0.45388	1.438	0.552144	1.37026	0.146478	0.348983	1.24409	0.899916	0.981483		0.2375	0.476077	1.70461	0.218847	0.224042	0.664437	0.320117	0.773153	1.72049	0.738443	1.00181	1.02323	0.804364	1.06512		0.2375	0.747994	0.638148	0.115569	0.430863	0.218673	0.824456	0.637733	0.707026	0.46823	0.888474	0.482202	0.301523	1.07022
0.239167	0.726325	0.651585	0.291877	0.715044	0.273649	1.52073	1.36232	1.39393	0.397107	0.406887	0.899393	0.871562	0.638064		0.239167	0.659065	1.24392	1.10995	0.796148	0.77134	1.36163	0.419085	0.00820005	0.809179	0.558797	1.32774	0.936653	1.10888		0.239167	0.734336	0.485119	1.04226	0.514769	0.679677	0.962061	0.217285	1.05058	0.21082	0.626959	1.64548	0.512744	1.12026
0.240833	1.07399	0.904922	0.142305	1.19599	0.246781	1.28456	0.71672	1.62281	0.254332	0.345957	1.15202	0.843991	0.952655		0.240833	1.24252	0.419081	1.26577	0.471637	0.521399	1.65089	0.883355	0.817577	0.356806	0.551607	0.570413	0.743534	1.18154		0.240833	0.73931	0.700832	0.908606	0.217868	0.0970304	0.9776	0.287952	0.77101	1.1426	0.691548	1.1766	0.378206	0.566692
0.2425	1.24733	0.533991	0.623099	1.02284	-0.117815	1.20846	1.00307	1.18688	0.228929	0.417188	1.1074	0.412936	0.358319		0.2425	0.752995	1.00294	0.964816	0.947702	0.634397	0.571915	0.763154	0.560363	0.840735	0.807462	0.310828	0.683148	1.0661		0.2425	1.12354	0.615764	0.679101	-0.0471034	-0.0793562	0.90708	0.654445	0.856935	0.272179	0.901297	1.183	0.6509	0.227461
0.244167	0.884253	0.627708	0.076781	0.885338	0.309512	0.900486	0.794851	0.942709	0.348811	0.204704	0.898819	1.44971	0.57456		0.244167	0.933437	0.0854934	0.784365	0.230809	0.280499	1.36314	1.01407	0.482612	1.02316	0.575079	0.251057	1.00878	0.762415		0.244167	0.847136	0.570861	1.16572	0.650589	-0.207219	0.512153	0.898287	0.752138	-0.014905	0.370847	1.1029	0.277404	1.18857
0.245833	0.4185	0.749155	1.60558	0.830759	0.758003	1.53852	0.882491	0.780048	0.167267	0.37401	0.980693	0.90854	0.783818		0.245833	1.07179	0.953913	0.887784	0.843566	0.635243	0.590448	0.44254	0.898475	1.10187	0.466468	0.942931	1.60154	0.794115		0.245833	0.500136	1.09501	0.788528	0.518795	0.356212	1.17314	0.555781	0.621891	0.52962	1.09805	1.22794	0.236107	0.875323
0.2475	0.783298	0.676036	0.275996	1.23555	0.5342	1.38959	1.09046	0.66824	0.650437	0.315524	1.18807	0.823027	1.22361		0.2475	0.544786	0.883476	0.471254	0.25748	0.551513	0.315454	0.882464	0.921314	0.508712	0.534571	0.788324	0.458085	0.49398		0.2475	1.4669	0.797231	0.591884	0.0974298	0.37655	1.06408	1.03836	0.666824	0.228693	0.86667	1.58433	0.306628	0.117468
0.249167	1.09153	0.346847	0.654926	1.06077	0.157811	1.50163	0.577851	0.975527	0.252296	0.529251	1.26273	1.21932	0.799343		0.249167	0.503755	0.660746	1.04284	1.13549	0.422842	0.799548	0.805602	1.16516	1.01615	0.562703	0.71641	1.09674	0.629234		0.249167	1.27688	0.94372	0.362166	0.839415	-0.402895	0.902333	1.01101	0.673035	0.637432	0.710196	1.64111	0.473261	1.0438
0.250833	1.31022	0.852941	0.54377	0.480717	0.7006	1.76378	0.786704	1.60432	0.108335	0.710079	1.10348	1.12135	1.19416		0.250833	0.334217	0.641103	0.74129	0.071969	0.681968	1.24657	0.95321	0.913208	0.816224	0.691937	0.940713	1.19534	0.677757		0.250833	0.343281	0.557497	0.54997	0.25294	0.123693	0.209815	1.05935	0.417665	0.286552	0.750436	1.33597	0.409783	0.770795
0.2525	0.945855	0.26716	0.477887	1.04121	0.487777	1.37406	1.05609	0.970433	0.567624	0.189793	0.988309	0.919509	0.436005		0.2525	0.431295	1.02659	0.491937	0.20243	0.621318	0.854357	0.794702	1.03132	0.57717	0.810398	1.84961	1.33668	0.869619		0.2525	0.351571	0.613757	1.22505	0.929982	-0.206897	0.570125	1.4333	1.44522	0.389371	1.06426	1.4152	0.592969	0.917102
0.254167	1.05339	0.163609	0.822518	1.37794	0.10929	1.06816	1.21207	1.35075	0.305616	0.0604461	1.06261	0.403506	1.12809		0.254167	0.588768	2.70931	0.504001	0.152315	0.912429	1.17438	0.587818	1.46175	0.378756	0.712365	0.96232	0.92131	0.593585		0.254167	0.751298	0.517052	1.98546	0.489693	-0.0491806	0.721072	0.586672	0.789612	0.670403	0.635137	1.57061	0.346305	0.83737
0.255833	1.50579	0.691479	0.665579	1.03739	1.22776	1.55561	0.707344	1.8882	-0.170795	0.594835	0.66128	1.11605	0.787178		0.255833	0.808934	1.44101	0.675102	0.251219	1.40923	0.8694	0.749352	0.896879	0.291381	0.975823	0.936921	1.78074	0.744186		0.255833	0.338639	0.656412	2.3633	1.01976	0.695052	0.574444	0.452881	0.537201	0.582672	0.997258	1.05727	0.320821	0.905872
0.2575	0.135025	0.543325	0.666779	1.25735	1.10615	2.20874	0.842585	1.45025	0.0153574	0.297013	1.06107	1.53017	0.751503		0.2575	0.470884	2.20613	0.220114	0.7267	0.787033	1.05541	0.744956	0.807112	1.38344	0.555748	0.642935	0.976244	0.916983		0.2575	0.63073	0.458696	2.61787	0.369291	0.377729	0.599161	0.398601	0	0.310121	0.708683	1.37026	0.344264	0.563722
0.259167	0.945403	0.726788	-0.103802	1.1734	0.132653	1.66209	1.37268	1.5286	0.66075	0.0616827	0.919511	0.285232	0.422541		0.259167	0.582555	2.63259	0.532505	0.889075	0.818701	0.14689	0.888043	0.874454	0.887236	0.836993	0.609371	1.30569	0.465717		0.259167	0.525325	0.749031	0.730141	0.0141317	0.260681	0.450392	0.830605	0.831834	0.266931	0.520916	0.932751	0.301867	0.891466
0.260833	0.817093	0.90481	-0.00380373	1.09962	1.28143	1.93161	0.799417	0.937266	0.241138	0.704751	1.01334	0.904568	0.721627		0.260833	0.353419	1.0287	0.788492	1.40185	0.845419	0.93354	0.637999	0.710268	0.694182	0.846862	0.928662	1.17061	0.90688		0.260833	0.746944	0.448536	1.11362	-0.0314875	0.363745	0.448229	1.02229	0.670856	0.345496	0.879547	1.95438	0.499609	0.990365
0.2625	1.22579	0.841354	0.510037	0.821641	0.627294	0.954237	1.90667	0.892819	0.121449	0.605504	1.59558	0.68038	0.876271		0.2625	0.71894	0.586223	0.621656	0.551442	0.534165	0.85693	0.577868	0.22643	0.734523	0.88072	1.48381	0.556643	1.31674		0.2625	0.958175	0.741807	1.12112	0.334431	0.314882	0.647926	0.879408	1.08134	2.04084	1.03744	0.770364	0.346605	1.11561
0.264167	1.37711	1.55586	0.375666	1.11835	0.525414	1.93106	0.556902	2.15216	0.758352	0.274673	0.861146	1.30673	0.486607		0.264167	0.965442	0.581378	0.854951	0.36153	0.675985	1.14496	0.518436	0.355873	1.06802	0.507207	0.909997	0.715266	0.891229		0.264167	0.662827	0.824832	0.857732	0.284284	0.443283	0.439155	0.742957	0.965293	0.116633	0.167021	1.15379	0.461032	0.939842
0.265833	1.47386	0.484574	0.646015	0.874489	0.44295	1.09444	1.84528	1.67084	0.381643	0.564287	1.08955	1.00229	0.801074		0.265833	0.982318	0.55139	0.810136	-0.163018	0.447227	1.31564	0.77412	0.940351	0.787787	0.496259	0.760569	1.04098	1.00653		0.265833	0.607451	1.02117	1.24632	0.465397	0.436067	0.692259	-0.479347	1.21439	0.885841	0.521031	1.40005	0.444144	0.544488
0.2675	0.704438	0.909054	1.00506	0.977538	0.151912	1.47673	0.834327	0.903266	1.11724	0.24975	1.18676	0.839519	0.896979		0.2675	0.630631	0.742306	0.494193	0.69237	0.568337	0.639379	0.893599	1.54013	0.684832	0.892812	1.33399	1.08822	1.34159		0.2675	0.655589	0.556805	0.481011	1.00699	0.236148	1.04359	0.558257	0.0660793	0.0492222	0.805423	1.03983	0.109917	1.11455
0.269167	0.968916	0.582302	0.450116	0.63008	-0.0798922	0.979575	0.731361	0.695073	0.412892	0.51397	1.53534	0.691952	0.818132		0.269167	0.670856	0.887112	0.680496	0.160959	0.70459	1.54157	1.02293	0.814119	0.289651	1.07249	0.936901	1.66071	0.36604		0.269167	0.522478	0.786481	0.960495	0.937089	0.166342	0.582235	0.633773	0.584985	0.613233	0.587834	1.32517	0.637565	0.878296
0.270833	1.03481	0.704325	0.65203	0.791393	-0.445125	1.64187	0.734789	1.62825	0.654716	0.484619	0.779998	0.765163	1.061		0.270833	0.815715	0.618667	0.874298	0.61408	0.618997	0.635012	0.5758	0.986509	0.710256	0.877534	1.22016	1.30298	1.2016		0.270833	0.710683	0.899557	0.683723	0.299123	0.238835	0.539188	0.400941	0.948467	0.711577	0.545591	0.972323	0.277292	0.297588
0.2725	1.36255	0.922717	0.237843	0.904295	0.0843565	1.72701	0.620039	1.5228	0.0572544	0.816668	1.36509	0.83232	0.7308		0.2725	0.675387	0.887939	1.16807	0.388474	0.808614	1.48698	0.722752	0.0735939	0.845255	0.345414	1.32258	1.18323	0.793104		0.2725	0.565764	0.614062	1.32288	1.00283	0.698472	0.898396	0.166357	1.14671	0.455441	0.504844	1.6305	0.548546	0.870269
0.274167	0.870519	0.453702	-0.212368	1.08278	0.883355	1.99639	1.06774	1.36077	0.507859	0.309566	0.787619	1.09716	0.468424		0.274167	0.439589	0.277674	0.996899	1.58001	0.580241	0.474663	1.04136	0.898483	1.46709	1.40266	0.692521	1.37638	0.894045		0.274167	0.816759	0.602316	0.119267	0.988759	-0.0789593	0.493118	0.454561	0.478563	0.789589	0.761683	1.41614	0.368141	0.55604
0.275833	1.03658	0.252027	0.549914	1.37129	0.634494	1.1527	0.242339	1.72949	-0.196271	0.567573	0.95582	0.960783	0.476139		0.275833	0.704337	0.781112	1.02755	2.36328	0.783931	1.47115	0.652209	1.08751	1.02646	0.640965	0.61938	1.22293	0.449695		0.275833	0.34793	0.347758	0.536713	0.620115	0.68563	0.410199	0.760822	1.04574	0.382078	0.572675	0.676819	0.625135	0.486802
0.2775	0.956573	0.797008	0.843216	0.828008	0.584329	1.14309	0.719514	1.27682	0.36866	0.423846	1.40671	0.941558	0.665912		0.2775	1.04423	0.933858	0.958313	1.0711	0.938947	0.728907	1.01012	0.484383	0.281611	1.33993	0.67384	0.882122	0.850805		0.2775	0.951254	0.515845	1.07869	1.0163	0.386873	0.461758	0.237254	2.43039	0.160652	0.405762	1.21628	0.422922	1.15745
0.279167	0.641281	0.825481	0.779119	1.06313	0.408923	1.00399	0.0467981	1.71396	0.14322	0.668854	1.38898	1.37628	0.819527		0.279167	0.307469	0.859357	0.946564	1.13206	0.502425	0.428509	0.51717	0.358373	0.883011	1.17784	1.11711	0.986367	0.488083		0.279167	0.628874	0.470256	1.33392	0.0485321	0.933562	0.318512	0.689047	0.552275	0.553898	0.815805	1.88099	0.470548	0.735648
0.280833	0.589202	0.731633	-0.00150937	0.380654	0.288292	2.1545	0.843696	1.36359	0.328609	0.54995	1.04195	0.448421	0.572032		0.280833	0.80661	0.514861	0.519391	0.348372	0.237084	1.26567	0.621697	0.874295	0.715147	1.07687	1.08601	0.856688	1.1066		0.280833	0.11642	0.685386	0.427613	0.190729	0.136626	0.822438	0.721921	0.910403	0.159788	0.617891	1.77433	0.306399	1.04932
0.2825	0.767528	0.125697	0.263395	0.820414	-0.108363	1.37085	1.02569	1.19479	0.52439	0.295197	1.15037	0.998181	0.373667		0.2825	0.757674	0.108694	0.308234	-0.0194647	0.434348	0.505111	0.993336	1.12263	0.540867	0.440576	0.748503	0.522165	0.503241		0.2825	0.795787	0.82531	0.497262	0.511259	-0.210354	0.610244	-0.0801155	0.584295	0.0898707	1.20516	0.82049	0.421879	0.93226
0.284167	0.468213	0.803792	0.378625	1.11732	0.243933	1.07357	0.35699	1.65965	0.112278	0.390505	1.18782	0.799948	0.743305		0.284167	0.542723	3.15865	0.697711	0.399402	0.681319	1.89011	0.308141	0.608066	0.677751	2.13758	1.20106	1.21221	0.504114		0.284167	1.05665	0.777657	0.150774	0.466179	0.432749	1.13734	0.450436	0.983263	0.640831	1.12824	0.995421	0.375765	0.727705
0.285833	0.519399	0.975707	0.307161	0.947847	0.808038	0.814417	0.613337	1.17359	0.162933	0.936449	0.918542	1.16228	0.861735		0.285833	0.478615	1.73123	0.582033	0.757283	0.843079	0.288992	1.17805	0.633311	0.767116	-0.000765383	0.527448	1.42097	1.1762		0.285833	0.397706	0.718697	0.97763	0.450481	0.514121	0.936071	1.6141	0.664231	0.349898	1.17933	1.31277	0.286199	0.682913
0.2875	0.712686	0.939466	0.544879	0.964502	0.649277	1.81932	1.39724	1.09248	0.617659	0.442077	1.34895	0.920084	0.633202		0.2875	-0.109116	0.627253	0.99889	0.309675	0.36589	1.28425	0.250658	0.835655	0.993151	0.483334	0.996941	1.19877	0.568932		0.2875	0.408655	0.693842	1.03666	0.366328	0.215153	2.03918	0.777277	0.278892	0.501004	0.527221	1.31891	0.508141	0.877173
0.289167	1.1769	0.595886	0.613712	0.640041	0.539256	1.25094	1.82003	1.08655	0.524327	0.445	1.31519	0.861326	1.25381		0.289167	0.971247	1.5404	0.761205	0.4828	0.700607	1.23695	0.61259	0.708466	1.11992	0.618055	0.547876	0.934892	0.899225		0.289167	0.752607	0.510638	1.43372	0.268043	0.579983	2.08606	0.446741	0.58309	0.804118	0.666489	1.8579	0.287878	0.642737
0.290833	0.664343	0.682539	-0.0536617	1.15803	0.665467	0.844256	0.842827	0.811408	0.444997	0.519076	1.35118	0.529493	0.716172		0.290833	0.774117	0.78622	0.867901	-0.106559	0.729379	-0.0887514	0.69992	1.5056	0.676784	1.05602	1.31056	0.859525	0.917395		0.290833	1.26658	0.386739	0.73932	0.25305	-0.62053	1.11445	1.51607	0.872296	0.50945	0.314296	1.21623	0.393684	1.54939
0.2925	1.61639	0.43871	0.326231	1.08209	0.834267	0.97707	0.714309	1.40344	0.717068	0.543024	0.782086	0.997075	0.749857		0.2925	0.176624	0.185217	1.30702	-0.116775	0.674265	1.59028	0.84953	0.752212	0.451857	0.760148	0.469393	1.93279	0.578979		0.2925	1.03979	0.419472	0.764014	0.501469	0.0681388	0.428366	0.868203	0.777899	0.0469805	0.663661	0.650985	0.732727	0.788758
0.294167	1.62309	0.656545	0.494867	1.10237	0.38971	1.5543	0.997535	1.73938	0.417536	0.658897	0.930213	0.909552	0.835716		0.294167	0.681025	0.837957	0.749727	0.189793	0.667126	1.1295	0.532122	0.435157	0.942606	1.42084	0.847494	1.19878	1.00074		0.294167	1.48611	0.225489	0.600293	0.350035	0.721254	0.626012	0.500063	0.888176	0.414146	0.268661	1.32644	0.561725	0.670634
0.295833	0.948501	0.679824	0.946461	0.83007	0.673496	1.67291	0.183504	1.25706	0.517202	0.270675	1.16742	1.03208	0.605286		0.295833	1.21954	0.976709	0.754505	0.664685	0.648957	0.832607	0.701914	0.968376	1.47462	0.701295	0.837244	1.38198	0.408756		0.295833	1.49028	0.567512	0.933092	0.0546901	0.583736	0.774643	0.577935	1.26287	0.892773	0.759064	1.32677	0.544117	0.289123
0.2975	0.813466	0.603913	0.645567	1.30395	0.287968	1.3437	0.872736	1.42105	0.309853	0.273362	0.798021	0.638447	0.923381		0.2975	0.701955	0.837988	0.696269	0.704607	0.783732	1.1098	0.623778	0.975054	0.889359	0.475548	0.811255	0.77749	1.4528		0.2975	1.18203	0.78244	1.02322	0.89598	-0.0575032	0.763575	1.04216	1.00179	0.32316	0.402414	1.86288	0.445094	0.964594
0.299167	0.952141	1.07418	0.64115	0.806997	0.285752	1.33556	0.76535	2.05033	0.169975	0.206309	1.08042	0.622562	0.843094		0.299167	0.505004	1.24752	0.408602	0.606811	0.433727	1.40062	0.721501	0.393728	1.27445	1.1724	0.930829	0.393414	0.811919		0.299167	1.53787	0.542017	0.785834	0.564423	0.110839	0.769543	0.889223	0.595899	0.51699	1.62457	1.39367	0.283428	1.05317
0.300833	1.9434	0.551583	0.717532	0.578202	0.5193	1.40105	1.09959	1.54308	-0.146896	0.351909	0.914895	0.893967	0.637305		0.300833	0.457855	0.973106	0.913719	1.12383	0.955587	1.09458	0.673662	0.523727	1.00612	0.929509	0.460039	0.540457	0.792731		0.300833	1.27678	1.10536	0.682545	0.543541	0.233622	0.756541	0.550147	0.536446	0.211931	0.449681	1.0365	0.542618	1.3739
0.3025	0.623647	0.917095	0.264307	0.552956	0.72303	1.52886	0.905418	1.86389	-0.174526	0.106272	1.21665	0.913893	0.557302		0.3025	0.432546	1.46195	0.668478	0.760342	0.607784	1.17332	0.333618	0.841387	0.5806	0.37674	0.619433	0.324153	0.733537		0.3025	0.323102	0.212834	1.08087	0.767763	0.268842	0.419903	1.55584	0.750236	0.527344	0.496838	1.52108	0.607203	0.907345
0.304167	0.873177	0.803527	0.999955	1.08393	1.04135	1.08391	1.06071	1.01643	0.112164	0.547945	0.979632	0.552779	0.644602		0.304167	0.745385	2.12146	0.35317	0.943173	1.17218	0.682195	0.477406	0.515534	0.912541	0.468583	0.529313	0.844345	1.35357		0.304167	0.505991	0.742131	0.405914	0.240827	-0.17944	0.659182	0.774409	0.714858	0.618535	0.595252	1.44378	0.396883	0.691936
0.305833	0.916823	0.824181	-0.00804585	0.542492	0.261012	0.708854	1.01333	1.72128	0.136364	0.264858	1.60398	0.350846	0.428266		0.305833	0.983174	1.41593	0.857973	0.651528	0.709586	0.676518	0.400768	1.35684	0.529607	0.421969	0.670017	0.457935	0.746141		0.305833	0.132159	1.54677	0.459264	-0.0937533	0.0172476	0.559742	0.608874	0.513732	1.22101	0.588262	1.46002	0.40285	1.09259
0.3075	1.10926	0.343865	0.643563	0.839454	0.813063	1.91646	0.894056	1.19713	0.174707	0.3504	1.04026	0.676117	0.696986		0.3075	0.849784	1.26532	0.479731	0.792421	0.31985	0.614049	0.439634	0.26013	0.885138	0.793311	0.981061	2.15126	0.894175		0.3075	0.448119	0.470447	0.846455	0.35803	0.472344	0.730796	0.974334	0.711327	0.58269	0.574145	1.55241	0.437924	1.07416
0.309167	0.868436	0.828182	0.771009	0.887888	0.0341614	1.55915	0.812472	1.81987	0.0184336	0.355663	0.606183	0.791932	1.13268		0.309167	0.497355	1.53079	0.567983	0.267106	0.573882	1.59751	0.547426	0.898024	0.584856	0.344948	0.785446	0.839033	0.959282		0.309167	0.583404	0.793808	1.03345	0.880781	0.312969	0.376593	0.181494	0.614329	1.88857	0.642731	0.987721	0.531384	0.234731
0.310833	1.12585	0.943532	0.464609	1.07634	0.609878	1.36799	1.02636	1.72646	0.277165	0.188084	1.60113	0.917185	0.173841		0.310833	1.07162	0.416309	1.11835	0.219437	1.43597	0.65984	0.86756	1.10594	0.97559	0.323585	0.964988	1.33229	0.935493		0.310833	0.46084	0.689224	0.549745	0.280215	0.412669	0.893883	0.289448	0.148277	0.290294	0.818312	1.49843	0.442394	0.86074
0.3125	1.30971	0.900846	0.910996	0.762615	0.765688	1.01696	0.916696	1.66741	0.192449	0.513421	1.10321	0.763871	0.544864		0.3125	0.494215	0.16442	1.03524	0.881072	1.29079	0.827878	0.501735	0.811553	0.616611	1.08513	0.822178	1.10996	1.39039		0.3125	0.739894	0.81233	0.446083	0.733993	0.675651	0.46726	0.840681	0.728925	0.859741	0.358471	1.32198	0.560659	0.440671
0.314167	1.15328	0.348382	-0.0379476	1.32044	-0.197041	1.41009	1.48483	1.5172	-0.255983	0.294538	1.15858	1.00865	0.700219		0.314167	0.664543	0.942773	1.02152	0.708316	1.36936	1.74933	0.657058	0.823796	0.499023	0.963641	0.48361	0.68517	0.92429		0.314167	0.64319	0.577318	0.466342	0.76766	0.12473	0.566655	0.776424	0.734135	0.837617	1.0475	1.39384	0.104454	-0.0432538
0.315833	1.04107	0.52867	0.867698	0.507732	0.0905572	1.19137	0.900826	1.15186	0.220597	0.312656	1.01519	1.20597	1.17292		0.315833	0.716814	0.591501	1.27603	0.111935	0.760694	0.939761	0.709309	0.99949	0.5841	1.16649	1.08345	0.873338	0.571627		0.315833	0.686059	0.647822	0.400092	0.399776	-0.12763	0.373754	1.15545	0.88551	1.23178	0.737253	1.96823	0.520768	1.12305
0.3175	0.760637	0.385881	0.537377	1.03442	-0.112046	0.557079	0.5681	1.39338	0.843681	0.420884	0.947126	1.14462	0.633229		0.3175	0.711882	0.429638	1.33866	0.253377	0.667945	1.53736	0.688174	1.06511	0.642839	0.600266	1.01924	0.593258	1.34655		0.3175	0.424306	0.237679	0.802807	0.0915571	-0.373337	0.883262	0.923817	0.57456	0.299433	0.393938	1.35587	0.423819	1.20151
0.319167	0.979948	0.842027	0.44692	0.975031	0.635025	1.68989	0.924763	1.3293	0.120327	0.405126	0.825372	0.844613	0.365953		0.319167	0.283113	0.363459	0.734579	0.770802	0.272274	1.57036	0.834307	0.739241	1.03254	0.802399	0.940085	0.571926	0.577498		0.319167	0.0444119	0.588312	1.02099	0.368428	0.439496	1.06675	0.6095	0.366166	0.291142	1.05958	0.787526	0.126074	0.970423
0.320833	1.31912	0.91215	0.731794	0.705053	0.0781953	1.05139	0.0123591	1.30988	0.0896213	0.336438	1.12941	1.38422	0.943355		0.320833	0.848158	1.20925	1.52985	0.697173	0.304964	0.371891	0.765412	0.41739	0.508787	0.832466	1.03686	0.798412	1.18488		0.320833	0.198855	0.331734	1.03252	0.62546	0.298904	0.723959	0.877023	0.714038	0.271223	0.496457	1.96705	0.618174	0.823589
0.3225	0.380493	0.687911	0.628912	0.916356	0.572083	1.42677	0.346636	1.17698	0.781635	0.825406	2.27508	0.846024	1.01897		0.3225	0.260972	0.213876	0.52993	0.805016	0.42983	0.377119	0.572458	0.775861	0.497234	0.593111	0.968503	1.54704	0.92355		0.3225	0.522136	0.782439	1.17686	1.12612	0.420657	0.891711	0.687523	0.172529	1.31146	0.415839	1.05673	0.370912	1.44488
0.324167	0.524104	0.386061	1.67259	1.14699	-0.0420616	2.19003	1.23915	1.4447	-0.0840493	0.270563	0.967377	0.84825	0.666889		0.324167	0.802481	1.03931	1.36154	0.228169	1.03937	0.639798	0.614056	1.96191	0.648197	-0.0317584	0.831583	1.18921	0.914989		0.324167	0.401696	0.669546	0.538591	0.424408	-0.0616529	0.669185	0.854115	0.817643	0.379591	0.492715	1.51074	0.317952	0.74325
0.325833	0.652651	1.06248	0.332489	1.66009	0.494722	1.09733	1.30647	1.20492	0.147618	0.255221	1.02085	1.02063	0.309762		0.325833	0.804685	0.48797	0.644373	0.924191	0.168734	1.37377	0.8803	0.928906	0.578704	0.640551	0.748519	0.489674	0.762777		0.325833	0.500045	0.785017	0.876338	0.243807	0.755433	0.438356	0.42435	1.06726	0.612383	0.781121	0.482541	0.188269	0.919679
0.3275	0.867786	0.666182	0.445119	0.562941	0.705025	1.24344	1.11564	1.60908	0.522292	0.335451	1.27794	0.556904	0.678679		0.3275	0.246287	0.828379	0.392285	0.143559	0.633354	0.804977	1.16424	0.542978	0.655093	0.293716	0.543603	1.09219	0.846131		0.3275	0.642005	1.10221	0.264857	0.26244	0.610461	0.872192	0.454802	0.640997	0.154581	0.388119	1.33275	0.335184	1.32309
0.329167	0.663438	0.716743	0.151564	0.950098	-0.0460588	1.009	0.573773	1.31923	0.768049	0.347357	1.10445	0.676498	0.568853		0.329167	0.268914	0.894531	0.686479	1.06064	0.516696	1.52184	1.31896	0.664937	1.07622	0.715744	0.68323	0.938267	1.034		0.329167	0.933707	0.35439	0.516352	0.486873	0.69146	0.990016	0.678565	0.504021	0.158141	0.838574	1.51509	0.428256	0.731717
0.330833	0.655453	0.7641	-0.249072	0.521864	0.224245	1.12775	0.490821	1.49367	0.213288	0.738895	1.22113	0.614669	0.908855		0.330833	0.773448	2.36245	1.11349	0.797112	0.83326	0.708503	0.589424	1.00401	0.491979	0.588869	1.14855	0.873329	0.44909		0.330833	0.602114	0.399016	0.710864	0.545496	1.1559	2.47551	0.799692	0.348326	-0.0765558	2.21297	1.79356	0.41437	1.17561
0.3325	1.16025	0.504297	0.96201	0.695234	0.98062	1.29908	0.733102	1.39008	0.129269	0.637796	1.32788	0.50738	0.730523		0.3325	1.02977	0.997875	0.5998	0.937359	0.554262	0.648143	0.782158	0.828154	0.4464	1.36366	0.486917	1.02593	0.492773		0.3325	0.203335	0.624376	-0.265151	-0.360736	0.137132	1.10206	0.798088	0.584466	0.954209	1.42647	1.41853	0.412721	0.516165
0.334167	0.470463	0.388635	0.0713291	1.26176	0.6058	1.22363	0.26633	1.54048	0.569202	0.916418	0.880029	0.838692	0.808902		0.334167	1.12167	0.41661	0.6773	0.795294	1.01291	1.06186	0.522433	1.1038	0.481746	0.676076	0.814638	-0.112842	1.20612		0.334167	1.10132	0.786411	0.996805	0.415166	0.217708	1.14172	0.501824	0.445519	0.711743	1.24031	1.02171	0.062847	0.538123
0.335833	0.86099	0.774246	1.04548	0.878433	0.887511	1.7994	0.705853	0.909533	0.0623766	0.748942	0.697364	0.948701	0.612182		0.335833	0.413988	0.439498	1.09377	0.117366	0.314255	0.673245	1.61596	0.860544	1.21675	0.387878	0.535596	0.600299	1.23757		0.335833	0.585968	0.258877	0.824371	0.598928	-0.0554044	1.05005	0.930212	0.784447	0.252163	0.630104	0.598563	0.30003	1.216
0.3375	1.2461	0.994379	1.15644	0.948051	0.580061	1.37232	0.916696	1.57573	0.278384	0.648115	0.697336	0.88388	0.820345		0.3375	1.5518	1.12492	1.03634	0.266164	0.747081	1.32924	1.21494	0.526553	0.756318	0.444422	0.581671	0.806866	1.90077		0.3375	0.660749	1.20262	0.850434	0.0194979	0.674247	0.955739	0.866265	0.708012	0.683241	0.792116	0.894654	0.47682	0.785028
0.339167	0.479512	0.896733	0.496237	0.955981	0.149235	1.07077	-0.0745882	1.32911	0.498481	0.490848	1.37787	1.37316	1.04083		0.339167	0.57971	1.50348	0.774893	0.345123	0.923923	0.779823	0.779474	0.407149	0.432117	0.948245	1.24699	1.40829	0.657504		0.339167	0.255374	0.684599	1.09433	0.671188	0.386123	0.558671	0.796031	0.778712	0.317733	0.912326	1.10195	0.568026	1.89124
0.340833	1.00351	1.01969	0.339944	0.498127	0.751494	1.98347	0.726325	1.07118	0.419782	0.529219	0.795578	0.766059	0.63114		0.340833	0.774518	1.51725	0.881135	0.408391	0.637853	1.02016	0.405074	1.60586	0.357045	0.317755	0.761937	1.31805	1.15694		0.340833	1.05815	0.549636	0.72212	0.201227	-0.217297	0.826359	0.602429	0.863465	0.332129	0.655799	1.72606	0.327311	0.752943
0.3425	1.17391	0.142494	0.442938	0.966311	-0.245268	1.34677	0.0893474	1.32294	0.0791516	0.720298	1.31458	0.6028	0.62316		0.3425	0.838432	0.681343	0.663893	0.652962	0.681286	0.864999	0.607775	0.891822	0.954057	0.55986	1.01159	1.08857	0.91332		0.3425	0.780819	0.559983	0.484554	0.40638	0.162038	0.571634	0.868884	1.32773	-0.049101	0.968443	1.07031	0.293766	0.917351
0.344167	0.558715	0.721125	0.553551	0.977808	0.508999	1.52448	1.29396	0.888191	0.366178	0.691746	1.3882	0.777899	0.973322		0.344167	0.442625	0.814844	0.413955	0.562599	0.863362	0.625769	0.414903	1.39772	0.608796	0.806318	1.12463	0.953775	0.979044		0.344167	0.424138	0.331279	0.888065	0.74216	0.0585688	0.693146	0.462484	1.32006	1.08315	0.995948	1.3695	0.386498	0.97344
0.345833	0.47232	0.477507	-0.617022	0.675205	0.416227	1.16952	1.16305	1.32313	0.0937927	0.575835	1.58691	0.653241	0.86436		0.345833	0.407645	1.05993	0.488487	0.405349	1.10631	0.78039	0.693321	0.614342	0.520649	0.964849	1.02508	1.26708	1.43564		0.345833	0.566599	1.2882	0.0410793	0.247401	-0.421693	0.675146	0.458773	1.13646	0.231793	1.00503	1.54354	0.337254	0.454182
0.3475	1.01825	0.970172	0.721911	0.844755	0.337966	0.842426	1.14432	1.54292	0.611933	0.454067	0.772107	0.67331	0.908515		0.3475	0.460331	0.682418	1.12537	0.075904	0.54005	0.867073	0.833298	0.303391	0.978573	0.671011	0.489247	0.557835	1.00374		0.3475	0.557595	0.21926	0.412951	0.49595	0.696958	0.755417	1.12835	0.704955	-0.0234591	0.526665	1.58876	0.331638	0.584468
0.349167	1.08148	0.389073	0.317935	1.23286	0.64876	1.50445	0.278585	1.24502	0.176317	0.619169	1.17059	0.773466	0.890585		0.349167	0.623701	0.935964	1.09782	0.557397	0.637904	1.13777	0.812348	0.365712	1.07181	0.605666	1.10309	0.44727	0.853811		0.349167	0.743423	0.708961	1.28508	0.789343	0.362681	0.527126	0.337879	0.259291	1.30182	0.880751	1.12326	0.389669	0.514578
0.350833	0.774528	0.200666	0.833952	1.27685	0.444826	1.23947	0.953647	2.05488	0.441625	0.34473	0.940576	0.610802	0.623294		0.350833	0.647249	0.556275	1.06759	0.69437	0.57459	0.670076	1.14015	0.75383	0.713941	0.264629	0.909687	1.41929	0.539643		0.350833	0.462867	1.15959	0.077925	0.401345	0.162074	0.476324	0.848747	0.640955	0.363555	0.844515	1.43326	0.376908	0.657796
0.3525	0.802266	0.720254	0.479421	1.04591	-0.405401	0.985525	0.643676	1.42042	1.09554	0.245399	1.11218	1.69986	0.859033		0.3525	0.715654	0.958374	0.668613	0.370181	0.66912	0.674502	0.767014	0.496398	0.734615	0.897857	0.84349	1.04091	0.748984		0.3525	0.672948	0.630106	0.454697	0.481959	0.518944	0.323736	0.684707	0.559961	1.40879	0.597043	1.71278	0.65485	0.458932
0.354167	0.480792	0.735039	0.635484	1.0896	0.46204	1.43073	0.333983	1.49806	0.417216	0.469685	0.855362	0.749113	0.81444		0.354167	0.422903	0.62095	0.704241	0.860707	0.258181	1.2981	0.769583	0.901697	0.686754	0.105388	0.751734	0.75978	1.06774		0.354167	0.743892	0.792156	0.952701	0.471989	-0.117598	0.723224	1.02792	0.768437	0.51009	0.714253	1.81655	0.617981	0.800695
0.355833	0.325534	0.57137	0.0757267	0.951314	-0.116491	1.12474	0.479947	1.43824	-0.119075	0.735955	1.3194	0.575514	0.861104		0.355833	1.0011	0.451318	0.491674	0.401996	0.905231	0.661883	0.608834	0.175716	1.06082	0.471473	0.722066	0.787291	1.4511		0.355833	0.588831	0.944571	0.780294	0.546126	0.222158	0.965696	0.38223	0.951166	0.418656	0.773015	1.33029	0.445576	0.873475
0.3575	0.696975	0.490777	0.695978	0.54654	0.746238	0.626972	0.694293	2.02218	0.0736295	0.507831	0.808456	0.560792	1.07782		0.3575	0.627883	1.05104	0.720656	0.27959	0.380952	1.22998	0.475246	0.852838	0.805319	1.21273	0.861779	0.75093	1.05688		0.3575	0.392182	0.473037	0.663077	0.384862	0.132478	1.10792	0.503307	0.572309	0.681904	0.780677	1.46286	0.313329	1.10531
0.359167	0.770464	0.5758	0.01736	1.01407	-0.0271529	1.12634	0.643108	1.24013	0.48236	0.42789	0.865854	0.837199	0.278456		0.359167	0.735852	0.941626	0.749708	0.216493	0.521365	0.857149	0.903417	0.542525	1.6034	1.41191	0.90911	1.48866	0.874648		0.359167	0.556347	0.6004	0.138005	0.331987	-0.216028	1.74798	0.807319	1.03867	0.624967	0.603682	0.934683	0.492042	1.10337
0.360833	0.920788	0.588582	0.212935	1.09063	-0.17407	0.62822	0.505182	0.976026	-0.0491215	0.694225	1.06906	0.559597	0.810249		0.360833	0.600642	1.18716	0.422244	-0.0439147	0.584833	1.05357	0.794452	0.96535	0.928035	0.733141	1.38545	1.22265	0.791935		0.360833	1.14722	0.653239	0.41909	0.0351055	-0.40147	0.961286	0.547888	0.515099	0.621037	0.609343	1.22834	0.363248	0.862197
0.3625	0.642351	0.767026	0.748095	0.964158	0.40682	1.23534	0.661129	1.80517	0.15848	0.463215	0.821298	0.642614	0.540085		0.3625	0.469956	1.0615	1.01362	0.868476	0.551853	1.30753	0.865709	0.718102	0.645739	0.662205	0.736186	0.606286	1.07142		0.3625	0.593407	0.671225	1.03257	-0.113141	0.151687	0.78861	0.883434	1.2459	0.573175	0.428633	1.59193	0.330826	1.56725
0.364167	1.14264	0.402885	0.447718	0.665059	0.528614	0.914381	1.2833	1.24479	0.622753	0.566595	0.85642	1.54188	0.813478		0.364167	1.15954	0.394641	0.827526	0.308901	0.547104	1.02917	0.922351	0.445182	0.841114	0.456536	1.00777	0.416161	0.520606		0.364167	0.915511	0.654979	1.15082	0.602427	0.660912	0.673767	0.781766	0.663541	0.746877	0.736954	1.37195	0.415093	0.694952
0.365833	1.0515	0.806582	0.0264474	0.439037	0.263851	1.58404	0.676706	1.14058	0.172511	0.345262	1.43189	1.08792	0.26351		0.365833	0.544971	1.3753	0.791211	1.01831	1.12018	0.887553	0.814434	1.32853	0.674508	0.57889	0.834939	0.684587	0.748727		0.365833	0.38341	0.764007	0.580819	0.551112	0.802446	0.8359	1.32064	0.446439	0.736581	0.934871	1.04514	0.175936	1.18871
0.3675	0.927558	0.816241	0.275118	1.05706	0.34297	0.875876	0.561102	1.1825	-0.160616	0.452684	1.10713	0.900423	0.749196		0.3675	0.690655	0.49327	0.724838	0.239183	0.87071	1.43766	1.34022	0.794586	0.333347	0.867373	0.411166	0.932327	1.35352		0.3675	0.401884	1.21855	0.545493	0.740067	-0.120397	0.347117	0.316073	0.515129	0.615147	0.819231	1.68439	0.636929	0.638872
0.369167	1.58354	0.543599	0.662087	0.828586	0.10473	1.22862	0.982545	1.69509	-0.107415	0.680076	0.732688	0.795917	0.72037		0.369167	0.607862	0.779548	0.796249	1.07361	0.368556	1.06024	0.760215	1.52541	0.435152	1.07419	1.00357	1.31769	1.18515		0.369167	0.695048	0.885797	1.05659	0.709185	0.107545	0.451012	0.501276	0.618522	0.529492	0.505945	1.35733	0.383782	0.470588
0.370833	1.25594	0.692507	1.07914	0.995193	0.560552	1.83244	1.44616	1.23044	-0.173816	0.386391	0.817478	1.02034	0.590228		0.370833	0.273804	0.728701	1.09069	0.429699	0.744253	1.22208	0.431779	1.48756	0.505167	0.978906	0.584527	0.323034	0.622825		0.370833	1.38621	0.73574	2.25705	0.733432	0.910842	0.558599	0.704812	1.51559	0.916168	0.756274	1.40214	0.39421	0.862824
0.3725	0.495695	0.603274	0.162181	1.1761	0.952069	1.0935	0.848973	1.04359	-0.282942	0.259181	1.06381	0.367132	0.89821		0.3725	1.54179	0.514711	0.668747	0.0457349	0.805328	1.37621	1.3163	0.907865	0.996523	0.456419	0.526194	0.6085	0.975382		0.3725	0.659361	0.606061	1.25579	-0.0739943	1.19815	0.329547	0.939885	0.835497	0.431857	1.16266	1.73208	0.7789	0.479033
0.374167	0.522202	0.654326	1.08473	0.659685	0.949153	0.85585	0.616586	1.09698	0.148255	0.488172	0.763138	0.707933	0.648537		0.374167	1.13482	0.59414	0.566187	0.0802338	0.629272	1.06252	0.686784	1.06851	0.621358	0.0715301	0.964361	1.48429	1.58727		0.374167	0.589288	0.71668	0.324192	0.447115	-0.422228	0.723621	0.642468	0.628564	0.0971408	0.358327	1.07011	0.256076	1.19041
0.375833	1.01915	0.49456	0.734869	1.10927	0.807261	1.41943	0.741977	1.31929	0.547793	0.595495	1.27237	0.716445	1.00569		0.375833	0.864894	0.319514	0.866946	0.50529	0.76625	1.04706	1.20404	1.30774	0.538005	1.52373	0.776699	1.07794	0.999022		0.375833	0.770486	1.44273	1.04539	-0.0715929	0.707264	0.763908	0.950036	1.01939	0.100656	0.936998	1.11096	0.577886	1.17775
0.3775	1.19734	0.323906	0.985353	0.421683	0.356697	1.49638	0.580643	1.23163	0.832805	0.584881	0.67641	0.789462	0.482859		0.3775	0.711728	0.757543	0.773246	0.485789	0.412461	0.653816	0.448392	0.137585	0.607801	0.498827	1.01695	0.879458	0.468454		0.3775	0.322469	0.447151	0.505473	-0.0377777	-0.0965941	0.555728	1.45674	0.828909	0.298158	0.437435	1.67133	0.684841	0.978109
0.379167	1.07635	0.488112	0.457124	0.633098	-0.0612423	1.32631	0.833028	1.44261	0.485002	0.50594	0.863627	1.15096	1.12118		0.379167	0.62196	0.221799	0.78181	0.631868	0.541571	0.944943	1.03184	1.07774	0.690319	0.673209	0.469043	0.611115	0.49554		0.379167	1.0048	0.530656	0.501175	0.0368835	-0.194517	1.13296	0.891338	1.06133	0.0472118	0.757889	1.88434	0.474116	0.908482
0.380833	1.03554	0.353342	0.699159	0.917764	1.12913	2.10084	0.849245	1.47233	0.184451	0.290964	1.01482	0.659286	0.395066		0.380833	0.789853	0.838235	0.336318	0.278933	0.513084	0.978239	0.736249	1.57635	0.527727	0.754035	1.0304	1.31407	1.52607		0.380833	0.483081	0.483559	0.342747	0.518219	0.00822961	0.456979	0.150307	0.533796	0.963453	0.450075	1.31109	0.369581	1.33437
0.3825	0.651248	0.746208	0.273531	1.13206	0.925035	1.37786	0.573944	1.42473	0.121669	0.791476	1.03473	0.737562	0.652855		0.3825	0.81	0.655131	0.372301	0.326828	0.462914	1.15073	0.700771	0.791236	0.363714	0.741061	0.933925	0.541027	0.576898		0.3825	0.179674	0.291618	0.573886	0.414704	0.670945	0.502545	0.583601	0.927098	0.343138	0.40264	1.52419	0.244466	0.561977
0.384167	1.03073	0.909053	0.279318	0.877706	0.509094	1.44421	2.18115	1.33172	0.423119	0.261259	1.42181	0.390464	0.999696		0.384167	0.974681	1.37097	0.746173	0.289813	0.561664	0.789796	0.390964	0.256362	0.796337	0.531757	0.618957	1.60465	0.980915		0.384167	0.397097	0.989947	0.156267	0.514699	0.42703	0.551864	0.967005	0.377484	0.583287	0.645191	1.35806	0.654598	0.445213
0.385833	1.64775	0.653275	0.234486	0.8	0.29522	0.932353	0.8827	1.61858	0.159213	0.302024	1.47885	0.83212	0.369887		0.385833	0.53912	0.763559	0.408848	0.239808	0.530903	0.996181	0.649378	0.508327	0.637836	0.531922	0.985842	0.869543	1.17851		0.385833	0.580936	0.717148	0.700752	1.01769	-0.16987	0.813391	0.783095	0.507334	0.102834	0.707343	1.51279	0.259443	0.89889
0.3875	0.921085	0.283941	0.432914	0.923115	0.0799812	0.858509	0.967088	1.57933	0.079174	0.798935	1.06297	0.81505	1.03424		0.3875	0.675554	0.78291	0.307193	0.901384	0.778362	0.386963	0.483722	0.445147	0.279198	0.554597	0.632218	0.248757	0.954095		0.3875	0.554484	0.814734	0.667476	0.136729	0.554854	0.866664	0.526551	0.665179	0.871134	0.552346	1.59476	0.647375	0.857639
0.389167	0.983746	0.881364	0.626898	1.01969	0.331926	0.775384	0.751496	1.50903	0.257862	0.325422	1.15172	0.616468	0.440587		0.389167	0.889957	0.449245	0.651847	0.285049	0.652557	0.550658	0.661644	0.801725	0.457377	0.486016	0.592831	0.880126	0.727973		0.389167	1.05023	0.300616	1.12378	0.904354	0.404262	0.993609	0.440303	0.971731	1.28963	0.212294	0.883685	0.243524	0.555141
0.390833	1.43793	0.719306	0.356466	0.748659	0.390915	1.94868	1.20461	1.9104	1.07056	0.686065	1.18302	0.753162	0.647557		0.390833	0.600227	0.834518	0.175998	0.382199	1.08783	1.45634	0.62558	1.20006	0.83041	0.72739	1.22799	0.860977	0.472326		0.390833	1.20187	0.544105	0.57271	0.0962267	-0.175648	1.10561	0.65934	0.426238	-0.0259529	0.807609	1.09374	0.50525	1.36275
0.3925	1.59619	0.672399	1.31807	1.28335	0.642857	1.8129	0.85004	1.20363	0.352251	0.377699	1.0142	0.952782	0.702636		0.3925	1.0032	1.09335	0.741096	0.158394	1.04111	1.09266	0.976859	0.888795	0.511269	0.714323	0.563075	0.792612	0.861435		0.3925	0.452212	0.5014	0.446956	0.35083	0.230902	1.46291	0.606663	0.930043	0.371832	1.19015	1.79033	0.301796	0.334406
0.394167	0.577851	0.709501	-0.255382	0.6803	-0.195031	1.03597	1.4967	1.27659	0.466767	0.586558	1.8256	0.888533	0.511411		0.394167	0.162191	0.60507	1.15723	0.869199	0.296723	0.632067	0.943356	0.276177	1.23674	0.46114	0.5047	0.76593	0.805358		0.394167	1.30519	0.478531	0.878785	0.325551	1.38827	0.995025	0.58403	0.870083	0.657579	0.957243	1.13963	0.154205	1.28357
0.395833	0.308459	0.658463	0.299167	1.3553	0.460498	1.28365	0.768201	1.14947	0.383275	0.51416	1.12401	1.27874	1.08802		0.395833	0.597649	1.25757	1.21259	0.839712	0.788402	0.285263	0.709113	1.10784	0.782307	0.776199	0.497265	1.24998	0.715669		0.395833	0.486113	0.854309	-0.0196515	0.465324	1.22842	1.15343	0.613958	0.499794	0.0935177	0.58844	0.991606	0.564923	0.233239
0.3975	0.479165	0.642927	0.164998	0.776413	0.930921	1.15205	1.97469	1.60768	0.141061	0.430743	1.1076	1.0734	0.581959		0.3975	1.0039	0.597002	0.717457	0.580978	0.71912	0.933386	0.852302	0.733863	1.06861	0.166357	1.11213	1.17215	1.33668		0.3975	0.812765	0.668766	0.757965	0.227866	0.0498137	0.991594	0.664768	0.841351	0.921104	1.00493	0.772341	0.26198	1.23649
0.399167	1.16129	0.689054	0.0407406	0.560876	-0.0313864	1.73657	0.977231	1.06379	0.214889	0.356357	1.37084	1.39913	0.555912		0.399167	0.602968	0.288981	0.617597	0.254271	0.492906	0.887157	0.47185	0.7327	0.916141	0.322379	0.887274	1.60645	1.38107		0.399167	0.760589	0.451574	0.734396	0.304906	0.169724	0.631684	0.948692	0.839482	0.274277	0.732942	1.45247	0.316577	0.984127
0.400833	0.283832	0.631622	0.913073	1.10139	0.0727887	1.69362	0.743281	1.80785	0.823115	0.60733	0.646164	0.991505	0.654865		0.400833	0.883351	1.29525	0.413187	0.502614	0.335402	0.927074	1.08161	0.451318	0.593246	0.759204	1.16566	0.586362	0.946746		0.400833	0.869509	0.531785	0.933794	0.564162	1.2933	1.02025	0.473143	0.587969	0.212255	0.877232	0.673461	0.23536	0.607965
0.4025	0.199243	0.462	0.391123	0.759125	-0.0706409	1.5211	0.823889	1.18904	0.117201	0.332959	1.10191	1.11699	0.6139		0.4025	1.46097	0.826273	0.763542	0.963019	0.711422	0.954679	0.996037	0.742198	0.51532	0.412757	1.07691	0.605694	0.560019		0.4025	0.626552	0.628654	0.386147	0.387293	0.826814	0.267177	0.444013	0.467539	0.65372	0.408784	1.33577	0.260473	1.49531
0.404167	0.452583	0.659141	0.519322	1.01692	0.188811	1.63871	0.788909	1.43306	0.137304	0.78056	1.36554	0.884454	0.89422		0.404167	1.30188	0.930419	0.322123	0.367158	0.787867	1.43568	0.31837	0.645456	1.42136	1.0615	0.995467	1.7554	0.5923		0.404167	0.638872	0.431509	0.475278	0.905578	-0.347223	0.766401	0.491297	0.482933	0.01199	0.565764	1.22736	0.417078	1.05479
0.405833	0.49565	0.326731	0.414245	0.626933	0.262669	2.38919	0.813887	1.25362	-0.193446	0.573676	0.767956	0.674157	0.577111		0.405833	1.1267	0.269511	0.791562	0.398246	0.569164	1.12917	0.509122	1.04693	0.699849	0.226255	1.0147	0.895854	0.884639		0.405833	0.73813	0.628773	0.545202	0.98145	0.733603	0.0883822	0.471441	0.726168	1.21263	0.990143	0.874714	0.576751	1.57322
0.4075	0.815919	1.14322	0.613902	0.542252	0.861978	1.18481	0.244096	1.07895	-0.164596	0.875858	0.857598	1.09878	0.777303		0.4075	0.57931	1.52681	0.891479	0.266357	0.892527	1.13841	0.556435	0.863016	0.683805	0.647229	0.847771	0.657388	0.817233		0.4075	0.769788	0.924711	1.0804	0.81434	0.0249373	0.691918	0.512271	0.363699	-0.117426	1.00123	1.59628	0.284439	0.910241
0.409167	0.696283	0.450653	1.02742	0.850159	1.45809	1.22592	0.364664	0.931276	0.473648	0.572504	1.10092	0.777847	0.680421		0.409167	0.525402	0.755838	0.72158	0.446962	0.768902	0.13624	0.105399	1.18773	0.71736	0.785053	1.05286	0.719185	0.791698		0.409167	0.493617	0.875949	1.04728	0.318588	0.369077	0.487608	0.77824	0.38056	0.5413	0.85079	1.04421	0.552535	0.836039
0.410833	1.08817	0.905943	-0.0841711	0.393374	0.717204	1.017	0.546525	1.39088	0.0584475	0.242116	1.04472	0.243784	1.17301		0.410833	0.647119	0.695055	0.76918	0.813991	1.06562	1.24719	0.814734	0.744495	1.14657	0.507241	0.878181	0.466687	0.996786		0.410833	0.298672	0.540365	3.36567	0.718213	0.137313	1.48664	1.24235	0.390033	0.70434	0.91416	1.29084	0.51902	1.66778
0.4125	1.10966	0.410467	0.147295	0.484884	0.640843	0.728165	1.17289	1.4251	0.0926573	0.707744	1.79541	0.748248	0.598086		0.4125	0.422694	1.1718	1.00384	0.520802	0.361895	1.41809	0.699805	1.36341	0.855732	0.261277	1.08992	0.478415	0.849102		0.4125	0.817268	0.796162	2.93605	0.430157	-0.129228	0.334747	1.39556	1.03146	0.397082	0.734551	1.22732	0.655895	0.569859
0.414167	0.849466	0.605656	0.42394	0.686727	-0.0414113	1.00944	1.38214	1.00243	0.095798	0.355269	1.31104	0.406853	0.909465		0.414167	0.516216	0.544418	0.566622	0.249085	0.789064	1.20838	1.06104	1.49241	0.661277	0.571283	0.908934	0.848429	0.872476		0.414167	0.304129	0.374713	0.777446	0.0304291	0.0711813	0.8793	0.538062	0.726309	0.199669	0.477859	1.99969	0.459851	1.6455
0.415833	0.897611	0.376475	0.357865	0.749313	-0.0315713	1.948	0.755325	1.41349	0.219461	0.544015	0.96678	0.899596	0.969523		0.415833	0.32077	0.551735	0.63616	0.710665	0.521478	1.08964	0.4035	0.930623	0.647465	0.298585	0.94682	0.784121	0.802166		0.415833	0.650059	0.775044	0.667764	0.560671	-0.0147747	0.270929	1.03836	0.572677	0.245602	0.72991	1.65439	0.396712	0.499935
0.4175	1.1286	0.712938	0.928302	1.00389	0.256688	1.88362	0.238507	1.37809	0.460427	0.540746	1.20183	0.605653	0.557461		0.4175	0.347327	0.908867	0.761366	-0.376626	0.815871	1.39633	0.931493	0.334167	0.651781	0.451666	1.71092	2.15234	1.03112		0.4175	0.23551	0.629393	1.23224	-0.273753	-0.0579414	0.552633	0.877361	0.285131	0.915375	1.34529	1.41296	0.303004	0.890319
0.419167	1.30966	0.501222	0.305072	0.515751	0.466467	1.04555	0.757142	1.59052	0.222942	0.182234	1.36494	2.17962	0.658272		0.419167	0.29809	1.74725	0.857633	0.80655	1.09926	0.730328	0.61281	1.05874	0.842833	0.514467	0.607876	1.6681	0.319945		0.419167	0.793706	0.65893	1.12856	0.1577	0.158489	0.899058	0.429018	0.724749	0.323276	0.5301	0.83091	0.523298	1.23045
0.420833	0.880013	0.697193	1.07877	0.901172	0.165314	1.80536	0.95279	1.43593	0.176244	0.359834	0.668883	0.744249	0.65908		0.420833	1.07318	1.31297	0.680317	0.276421	0.860345	0.809698	0.819584	0.713172	0.689165	-0.201384	0.932717	1.25959	0.79058		0.420833	0.324999	0.153196	0.413666	-0.0609928	0.0756539	1.31985	0.522658	0.820717	0.55861	0.596933	1.89002	0.579452	0.571492
0.4225	1.44671	0.64153	1.0051	0.455739	1.34531	0.899582	1.08529	1.2568	0.0911893	0.568459	1.62387	1.02256	0.958564		0.4225	0.808407	0.399224	0.77528	0.2803	1.37124	0.96005	0.790683	0.334675	0.496473	0.416091	0.295895	1.25147	1.60666		0.4225	0.92383	0.471052	0.60362	0.415094	0.44798	0.64476	0.514364	0.485929	0.976675	0.819019	1.24942	0.0669748	1.46086
0.424167	0.89812	0.189322	0.641667	0.78249	0.652986	1.26124	0.0397605	1.62288	1.00646	0.671209	1.02543	0.450106	0.596013		0.424167	0.466729	0.876693	1.11838	-0.0199146	0.404307	0.580028	0.691608	0.242902	0.974131	0.513408	0.766754	1.04263	0.975448		0.424167	0.683978	1.01846	0.946637	1.05535	0.304813	0.98037	0.925138	0.435038	0.00513494	0.482992	1.30079	0.432432	1.22237
0.425833	0.547125	0.412575	0.843938	1.05033	-0.365999	1.38346	1.46527	0.999153	-0.18275	0.515106	1.02241	0.893855	0.777327		0.425833	0.728509	0.206119	0.828952	0.54952	0.685828	0.565856	0.662322	0.364772	0.817415	0.515451	1.04004	0.958168	1.58945		0.425833	0.462813	0.749781	0.638019	0.886307	0.386708	0.418899	0.153761	0.662983	0.439237	0.436205	1.99316	0.712885	0.295221
0.4275	1.1259	0.386501	0.652708	1.09635	0.431295	1.75171	0.519915	1.33399	-0.0985892	0.826003	0.871713	0.692165	1.11782		0.4275	0.972081	1.34317	1.07395	1.06669	0.807666	0.414827	0.505849	0.687443	0.428128	1.11133	0.494539	0.936623	0.473339		0.4275	0.320594	0.715571	0.833359	0.469649	0.0560285	0.178301	0.530139	0.310167	0.0980493	0.525006	1.10009	0.214569	0.964079
0.429167	1.18103	0.685131	0.94919	1.18817	0.694152	1.57467	1.02433	1.03966	-0.0481629	0.71689	0.926136	0.721615	0.805785		0.429167	0.86352	0.654381	0.937542	0.748915	1.21491	0.434463	0.389864	1.57674	0.862552	0.681663	0.778597	1.04392	0.705943		0.429167	0.404522	0.510583	0.768559	0.419161	0.0986335	0.597138	0.349028	0.786198	0.978877	0.569891	1.16294	0.569389	1.15978
0.430833	0.9756	0.380003	0.88622	0.995994	-0.417243	1.83961	0.652201	0.942749	0.310561	0.306849	0.992515	0.846914	0.519312		0.430833	0.533476	0.43572	1.26139	0.432816	0.946133	0.685331	0.890699	0.613938	0.668118	0.751389	0.968367	1.34152	1.08916		0.430833	0.765507	0.622873	0.567538	-0.0307832	0.241616	1.04134	0.252012	0.85789	0.6455	1.01461	0.902766	0.493008	-0.304634
0.4325	1.09261	0.583479	0.41866	1.00065	1.2229	1.31287	0.630769	1.29808	0.260048	0.101825	1.31252	1.14404	0.775311		0.4325	0.45282	0.503473	0.968659	0.132503	0.454093	0.554673	1.06275	1.39031	1.11767	0.118713	0.913143	0.509512	1.04308		0.4325	0.32218	0.489585	0.790966	0.34895	0.464505	0.130594	0.889757	0.503415	0.562127	0.342341	1.7502	0.222	0.913347
0.434167	1.18378	0.626671	0.158166	0.89065	1.0397	1.72868	1.04035	1.36456	0.264809	0.466749	1.27586	0.692146	0.691862		0.434167	0.420829	0.708369	0.902587	0.771876	0.448737	0.715891	1.10811	0.233491	0.81969	1.23238	0.552862	0.67627	0.722379		0.434167	0.925684	1.04398	0.62658	0.786132	0.53739	1.04975	0.656482	0.639809	0.75209	0.801814	1.16154	0.450325	0.188033
0.435833	1.29851	0.667269	-0.423132	1.00952	0.188583	1.41847	0.70068	1.32159	-0.194198	0.299353	0.99102	0.612693	0.803998		0.435833	0.293958	1.18127	0.601555	0.781851	0.408347	1.29526	0.85629	1.00747	0.724203	0.763406	1.03462	0.609147	0.900769		0.435833	0.093375	0.947199	1.02966	0.232512	0.161718	1.13314	1.02318	0.804103	0.919888	0.791461	0.935128	0.193303	0.854509
0.4375	0.457132	0.582145	0.806879	1.28122	0.184636	1.02264	1.05971	1.41732	0.416005	0.387739	0.833859	1.05427	0.995784		0.4375	0.732081	0.953928	0.583267	1.18548	0.440603	1.16084	0.902319	0.306418	0.544377	0.446924	0.799654	0.667074	1.1683		0.4375	0.554311	0.55054	0.858694	0.525715	0.0536326	0.418244	0.958282	0.674632	0.946316	0.683286	1.50335	0.577936	0.402212
0.439167	1.41333	0.608196	0.669189	1.05731	0.304448	1.26941	1.17937	1.88409	0.52756	0.322906	1.12418	0.542629	0.324816		0.439167	1.0149	0.444534	0.453165	0.790663	0.307665	0.830684	0.40707	0.569629	0.827421	0.620636	0.786598	0.959729	0.877926		0.439167	0.827907	0.455809	0.763629	-0.201614	1.06576	1.0938	1.27094	0.943497	0.790332	0.699392	1.61753	0.352144	1.15481
0.440833	0.901769	0.593059	1.26614	0.473816	0.106663	1.19045	0.407343	0.752508	-0.0382648	0.508347	0.950532	0.849192	0.870544		0.440833	0.839631	0.18126	0.575215	0.0916114	0.908899	0.523489	0.9832	1.27178	0.763406	1.15173	0.384911	0.962749	0.822334		0.440833	1.06939	0.180103	0.963804	0.226892	0.82177	0.651583	0.512523	1.04252	0.999604	0.555235	1.65815	0.451419	1.40852
0.4425	0.97003	0.690926	0.812623	0.993707	0.4746	0.951396	0.521475	1.25631	0.0869793	0.539914	1.16743	0.725891	1.03642		0.4425	0.381217	0.740251	0.564395	0.0963525	0.695542	1.19858	0.381186	1.33095	1.05695	1.78252	0.857597	0.983961	0.982647		0.4425	0.629668	0.616864	0.711661	0.466548	-0.0297667	0.460072	0.956106	1.0871	0.01199	0.502547	1.75213	0.288536	0.942712
0.444167	0.620098	1.19695	0.128493	0.710824	0.872134	1.38086	1.03012	1.61616	0.264589	0.502407	1.37942	0.427141	0.715695		0.444167	0.0437522	1.18869	0.853424	-0.17874	0.4051	0.61182	0.661884	0.751424	0.986235	0.941584	0.688513	1.1755	0.961981		0.444167	0.756185	0.485437	1.17851	0.612937	0.0743493	0.857558	0.637376	0.546532	0.646181	0.271383	1.18973	0.151057	0.773997
0.445833	1.23873	0.579266	0.857427	0.944941	0.529303	0.895838	0.521038	1.59065	0.0775639	0.697221	1.23029	0.523457	0.397307		0.445833	0.60373	0.44312	0.640519	0.646626	0.688735	1.05157	1.00984	1.37853	0.888137	0.936593	0.688676	0.66995	0.813537		0.445833	0.645506	0.672978	0.509109	0.387263	0.0326676	0.411532	0.643847	0.619867	0.243174	1.01456	1.2175	0.274486	0.898958
0.4475	0.809345	0.46139	0.712442	0.440141	0.170634	2.03391	0.844829	1.60799	0.640151	0.447445	1.30321	0.880243	0.653353		0.4475	0.334024	0.911524	0.805956	0.481481	0.656404	0.847981	0.43851	0.122358	0.84301	1.09227	1.13539	1.08052	0.879802		0.4475	0.589182	0.853952	0.593061	0.733067	0.859593	0.696212	0.833341	0.522193	0.854478	0.989098	1.4866	0.596646	1.16034
0.449167	1.21564	0.596278	0.359986	1.13268	0.0726898	1.12059	0.66099	1.24962	0.232427	0.403364	1.4801	0.784384	0.675362		0.449167	0.523732	1.19389	0.682114	0.351408	0.170452	1.49655	0.369774	-0.0713186	0.294093	1.18577	0.597907	1.49361	1.25744		0.449167	0.746016	0.50798	0.147346	0.911374	-0.584413	1.02114	1.2829	0.450096	0.722559	0.867206	0.874317	0.288063	1.66391
0.450833	0.917745	0.827446	1.27931	0.929288	1.01319	1.80736	1.00296	0.919905	0.730392	0.654879	1.03576	0.866045	0.580433		0.450833	0.778227	0.783012	0.526836	0.406835	0.701158	0.774409	1.01917	0.354297	1.21145	0.907156	1.05094	1.6755	1.30142		0.450833	0.570307	0.642474	0.413873	0.293395	0.904176	0.581546	0.0334895	0.338287	0.0173841	0.894815	1.42033	0.297095	0.540442
0.4525	1.04883	0.309195	1.15671	0.865167	0.17383	1.32459	1.00966	1.96115	0.00923336	0.384756	1.76436	0.908607	0.690654		0.4525	0.79602	0.932118	0.785546	0.385131	0.944505	1.33553	0.571913	0.988282	0.584112	0.142374	0.774353	1.73177	1.19667		0.4525	0.381055	0.807628	0.456926	0.767913	0.250547	0.520881	0.253385	0.570801	0.669999	0.991857	1.25857	0.154936	0.496186
0.454167	0.961735	0.832995	0.795639	1.20643	0.432083	1.09036	1.05686	1.13113	0.483397	0.286304	1.06668	0.702648	0.579412		0.454167	0.44658	0.739677	0.846149	0.151435	0.671766	1.49101	0.491758	0.461073	0.586081	1.14342	1.16651	1.33214	1.05038		0.454167	0.868636	0.779727	0.801103	0.397464	0.678797	0.529579	0.507244	0.720147	0.314995	0.415192	1.64514	0.564691	1.12964
0.455833	0.361855	0.847388	0.405018	1.0711	1.19289	2.00999	0.579325	1.35999	-0.18381	0.711093	1.66816	0.620062	0.917294		0.455833	0.88713	0.673879	1.28994	0.0891823	0.487433	0.391646	0.565007	0.505769	1.08164	0.612591	0.646237	0.880013	0.891928		0.455833	0.808553	1.24115	1.78589	0.488464	-0.073436	0.615628	0.433773	0.757855	0.0813617	0.746252	1.06028	0.458515	0.925518
0.4575	0.618385	0.653719	0.0615021	0.534954	0.83303	2.0317	0.469736	1.02627	-0.0555966	0.181419	1.2336	0.854645	0.588112		0.4575	0.223969	1.52436	0.647333	0.905298	0.792529	1.0811	0.612987	1.23547	0.540069	0.645164	0.610354	1.01929	1.08124		0.4575	0.373841	0.470673	0.915459	0.559596	0.441309	0.510238	1.20308	0.693249	0.491315	0.586484	0.886761	0.536901	0.998668
0.459167	1.07805	0.169044	0.484198	1.23166	0.291779	0.990412	0.423025	1.44434	0.260122	0.450331	0.80819	0.442096	0.743621		0.459167	0.43901	0.582766	0.601323	0.530254	0.233244	1.29596	0.607088	0.493102	0.358778	0.701385	0.889058	0.989154	1.05537		0.459167	0.697429	0.56993	1.07214	0.151607	0.55274	0.303037	1.10146	0.668702	0.792918	1.02522	0.414142	0.425856	0.647103
0.460833	0.744797	0.54299	1.25317	1.07266	-0.00669932	1.48555	0.81833	1.57226	0.441524	0.401308	0.823028	0.858505	0.779744		0.460833	0.809238	1.40999	0.727568	0.526977	1.20901	0.969419	0.617021	0.637475	0.796646	0.764875	0.56507	1.08426	0.926046		0.460833	0.330069	0.995025	1.50357	0.326572	0.40677	0.558191	1.49191	0.858237	0.634373	0.331659	1.52997	0.439715	1.26762
0.4625	0.857146	0.542099	0.326964	0.535607	0.514141	1.9698	0.451867	1.36992	0.534378	0.784456	1.18887	0.673307	0.538672		0.4625	0.332818	0.214378	0.889303	-0.0018661	1.10909	0.759293	0.643639	1.16368	0.629381	0.64481	1.0254	0.966423	0.817661		0.4625	0.255395	0.501439	0.347618	0.551061	-0.0613079	0.809362	0.247822	0.939583	0.970781	0.937144	0.319037	0.58072	0.148106
0.464167	0.84014	0.529987	0.530958	1.05918	0.133717	1.29199	0.977698	1.84244	0.343419	0.582353	0.875193	0.992713	0.369493		0.464167	0.561325	0.777521	0.579947	0.529252	0.583856	0.616188	0.853898	0.535029	0.499938	1.17132	0.60345	1.21876	0.757114		0.464167	0.794263	0.220284	1.09909	0.387896	0.339468	1.01882	0.247429	1.11478	0.557281	0.898038	0.89024	0.333244	1.04426
0.465833	1.02531	1.08816	1.06143	0.5449	0.677114	1.39079	0.689788	0.951042	0.843242	0.574465	1.25041	0.946053	0.607304		0.465833	0.54076	0.449677	0.213785	0.649705	0.402014	0.873369	0.404204	0.594629	0.71427	0.896442	1.03448	1.12652	0.871984		0.465833	0.667022	1.03474	1.16652	-0.137857	0.574361	0.524647	0.805597	0.649991	-0.0512962	0.329056	0.767359	0.427504	0.758426
0.4675	1.42652	0.784413	0.438253	0.772763	0.98239	1.54324	0.530925	1.39064	-0.134583	0.590115	1.00561	0.613685	0.523617		0.4675	0.808266	1.5285	0.551701	0.938527	0.970853	0.836283	0.664267	0.722099	1.51463	0.483154	0.639482	1.09469	1.9675		0.4675	0.532411	0.241138	1.08777	0.809296	0.656722	0.814559	1.46554	0.628394	1.09246	1.17666	1.39162	-0.0443174	1.035
0.469167	1.05458	0.42684	-0.139174	1.23076	0.360796	1.35521	0.768347	1.20705	0.154807	0.407456	0.599185	1.27439	0.525862		0.469167	0.48976	0.425338	0.766104	0.734698	0.713327	1.57132	0.561191	1.27929	1.0195	1.58465	0.880168	1.1852	0.591341		0.469167	0.27356	0.837502	0.541133	0.237439	0.203804	0.501209	0.952151	0.774417	0.872015	0.556083	1.51088	0.174459	0.840465
0.470833	0.818144	0.533515	0.447019	1.02302	0.617388	1.0447	0.487659	0.909682	-0.0688448	0.242699	1.40525	0.283849	0.885433		0.470833	0.756299	1.13458	0.994079	0.304969	0.721899	0.993647	0.93341	0.736983	0.992147	0.739849	0.987687	1.04316	0.8496		0.470833	1.05181	0.783573	0.274911	0.417509	0.711905	0.71683	0.295451	0.895476	-0.303833	0.385811	1.54878	0.286704	0.981477
0.4725	1.24814	0.791683	0.627039	0.648001	0.615372	0.791107	0.884117	0.998315	0.435809	0.307894	0.893637	1.03923	0.497136		0.4725	0.526697	0.875738	0.682186	0.40813	0.335381	1.42713	0.7802	0.41392	0.71982	0.923378	0.30188	0.807824	1.08578		0.4725	0.275324	0.73101	0.615857	0.539745	-0.195174	0.390922	0.447178	0.108279	0.320948	1.07669	0.840634	0.150804	1.21716
0.474167	1.0577	0.375956	0.934193	0.993421	1.20768	1.20971	1.12031	1.26869	0.249792	0.347862	1.4504	0.757609	0.752688		0.474167	0.616497	0.956383	1.1006	-0.0484649	0.378493	1.05821	0.538921	1.11773	0.721072	0.481173	0.728129	1.04762	0.395323		0.474167	0.653694	0.500827	1.13747	0.225651	0.520066	1.08462	0.876664	1.11109	0.207729	0.618784	1.64893	0.428826	0.879258
0.475833	1.11536	0.891341	0.504448	0.970999	-0.325922	1.40455	0.767438	1.07571	0.657447	0.515423	1.86544	1.68715	0.883583		0.475833	1.31929	0.67582	0.74681	0.81655	0.294538	0.742083	0.664979	0.289705	0.25663	0.305029	0.799108	0.365977	0.816925		0.475833	0.775142	0.475593	0.605509	0.875525	0.23057	0.872526	0.556769	0.885701	0.357729	0.817535	1.10249	0.329852	0.74
0.4775	0.366177	0.587544	0.653851	1.23943	0.406699	0.661184	0.85502	1.59147	0.557441	0.28347	0.82713	0.935128	1.13364		0.4775	0.417904	0.371683	0.79297	0.0637605	0.209912	0.767061	0.550999	0.680955	0.764477	0.494315	0.505051	1.00487	0.990809		0.4775	0.281983	0.754181	0.565468	0.709758	-0.126613	0.599097	1.00847	0.475388	0.536697	0.731445	0.767737	0.476799	0.738715
0.479167	1.26896	0.740772	1.01842	0.549218	0.711328	1.50332	0.850735	1.93411	-0.133284	0.614376	0.950236	0.904256	0.953268		0.479167	0.570488	-0.0129179	0.846042	0.351757	0.569873	0.853191	0.359484	2.61808	0.580858	0.873237	0.971251	0.483428	1.0816		0.479167	0.313627	0.601176	0.777719	0.11349	0.55203	0.629395	1.20982	0.974357	1.25714	0.738834	1.33791	0.064397	0.733853
0.480833	0.764181	0.855878	0.555439	0.686253	0.110029	0.543358	0.875742	0.868998	0.0315872	0.640827	0.594872	0.498527	0.285432		0.480833	0.568604	0.933464	0.753696	0.868887	0.397124	1.71185	0.570225	0.907917	0.88778	0.682993	0.993821	1.09684	0.796579		0.480833	0.490666	0.44835	1.44651	0.495997	0.7	0.728573	0.257945	0.662252	0.390018	0.548496	1.30591	0.283336	1.12869
0.4825	1.37637	0.653567	0.906982	0.918356	0.368196	1.50783	1.09879	1.83506	1.63125	0.347755	1.74318	1.04796	0.630389		0.4825	0.920972	0.591623	0.854737	0.278663	0.99739	1.98231	0.416354	0.787347	0.579262	0.99957	1.15691	0.802973	0.514573		0.4825	0.340283	0.903526	0.843202	-0.275203	0.202547	0.972174	1.1012	0.244559	0.389583	0.390742	1.36193	0.0880766	1.24533
0.484167	0.882963	0.422146	0.710676	0.780911	0.860246	1.775	0.949485	1.50295	0.910721	0.657368	0.976952	0.768525	0.626282		0.484167	0.88032	0.717538	0.727428	0.134183	1.42626	0.873912	0.321785	0.753645	0.765827	0.572954	0.469674	0.920347	0.582084		0.484167	0.555901	0.424287	0.367247	0.527722	-0.0166206	0.172962	0.220815	0.0862459	0.599609	1.06789	1.23053	0.788851	0.606302
0.485833	1.58918	0.295078	1.10217	0.998351	0.254461	0.932288	0.802651	0.994497	0.435309	0.386517	1.23503	0.356554	1.24978		0.485833	0.427832	0.501319	0.942734	0.624336	1.65754	1.09602	0.644385	1.08639	0.885964	0.438117	0.745189	1.0415	1.3736		0.485833	1.39336	1.11749	0.6009	0.396138	1.02294	0.648663	0.493602	0.303714	0.710586	1.01395	0.790389	0.219602	1.31562
0.4875	1.25495	0.976832	0.324302	1.37864	0.171954	0.855449	0.292599	1.20906	0.271469	0.319017	1.27719	1.28616	0.409562		0.4875	0.842169	0.354708	0.346883	0.0312098	0.557294	1.26219	1.13287	1.06806	0.74757	0.623412	0.826644	0.939471	0.609193		0.4875	2.88271	0.477482	0.898858	0.664865	0.0182076	0.438962	0.0607266	0.754245	0.661565	0.364365	1.17003	0.324844	0.552455
0.489167	1.1204	0.555069	0.905805	1.40237	0.421085	1.50556	0.226662	1.59889	0.720556	0.408147	1.21519	0.47137	0.777555		0.489167	0.49734	1.10668	0.385307	0.197554	0.384879	1.0817	0.495113	0.973056	0.969493	0.449721	0.947074	0.600337	0.192831		0.489167	0.381808	0.965003	1.35854	-0.15394	0.36267	0.610424	0.286174	0.677033	0.174073	0.598563	1.43798	0.412475	0.697831
0.490833	1.35674	0.61777	0.413289	0.958313	0.452793	0.716596	0.887966	1.01721	-0.00497508	0.443477	1.14655	0.5794	1.44294		0.490833	0.393391	0.680366	0.900322	1.28915	0.450653	0.164682	0.842205	0.912761	0.548766	1.18487	0.757778	1.08982	0.812886		0.490833	0.898876	0.40464	0.934404	0.372699	0.374414	1.14494	0.701348	0.599418	0.0817732	2.2528	1.28456	1.63031	2.08727
0.4925	1.07974	0.773622	0.665884	1.24337	0.408557	1.19142	0.725751	1.75026	-0.394711	0.452089	1.21547	0.920972	0.994251		0.4925	0.846834	0.410379	0.820026	-0.170073	0.719531	0.748099	0.669638	1.0642	0.657295	0.122334	0.777795	0.88195	0.69738		0.4925	0.683165	0.697042	0.938068	0.484861	0.775237	0.471122	0.704545	0.909958	0.252916	0.8	1.86539	0.617774	1.3289
0.494167	1.27529	0.521181	0.236979	0.559116	0.392954	1.20245	0.495839	1.00085	-0.0734892	0.124167	0.831876	0.69893	0.652443		0.494167	0.422185	0.394877	1.06448	0.623377	0.375681	1.50343	0.717033	0.409577	0.51752	0.547889	1.42989	0.604759	0.987167		0.494167	0.624498	0.640247	1.49292	0.360226	-0.459187	0.934153	0.603867	1.13084	0.563518	1.03936	1.58413	0.673796	0.726963
0.495833	0.208651	1.06945	0.340541	1.00856	0.554637	0.579458	0.822524	1.37905	0.182548	0.505398	1.85315	0.472895	0.510117		0.495833	0.832877	3.1097	0.494337	0.354477	0.967708	1.94092	1.01682	0.514083	0.451186	0.223655	1.13873	1.0813	0.91577		0.495833	0.2291	0.347162	0.331198	0.328818	0.10362	0.918313	0.365321	1.02562	0.287916	0.528565	1.17236	0.299561	1.05182
0.4975	1.14111	0.64651	0.390943	1.23929	0.0899913	1.55875	0.598951	1.12033	0.418676	1.49722	1.47981	0.907245	0.340129		0.4975	0.410313	0.932628	0.687102	0.204336	0.442431	0.767093	0.398892	0.975122	0.215675	1.01768	0.942103	1.04146	0.733199		0.4975	0.521014	0.239887	0.414335	0.368048	1.63099	0.515033	0.597054	0.43177	0.930375	0.634726	1.30211	0.591211	0.681007
0.499167	0.242262	0.421754	0.925793	0.836766	0.317881	1.76725	1.12422	1.04491	0.0496418	0.728317	1.21869	0.600073	0.717891		0.499167	0.663321	0.827928	0.370169	0.0961738	0.453819	0.874374	0.59988	0.230848	0.495476	0.970443	0.565635	1.77352	1.23123		0.499167	0.666149	0.800843	0.631356	0.735234	0.397748	0.558572	0.867211	0.676501	0.247124	0.397062	1.30681	0.152569	1.38417
0.500833	1.43608	0.168368	0.298387	0.759483	0.606293	1.19733	1.21472	1.3299	0.416917	0.391164	1.40653	0.301679	0.621808		0.500833	0.759333	1.38276	0.713714	0.0291091	0.537565	0.728111	0.665945	1.00695	0.256734	0.614866	0.52332	1.4514	1.01315		0.500833	0.469862	0.564163	1.06701	0.906705	-0.284026	0.786576	0.767386	0.65495	1.08979	0.528201	0.848306	0.519267	0.811672
0.5025	0.82432	0.393133	0.379945	0.698738	-0.0586565	1.25752	0.991399	1.90065	0.165259	0.361627	1.45267	1.10576	0.783716		0.5025	0.867187	0.715936	1.34255	0.219941	0.549021	1.1217	1.14049	1.1002	1.20334	0.797339	0.606783	1.03564	1.17758		0.5025	0.62021	0.324809	0.882796	0.822719	0.788591	2.01763	0.611393	0.805819	0.374113	0.43713	1.40713	0.800242	1.1595
0.504167	1.46971	0.713881	0.844168	0.568277	0.767859	1.27349	0.918994	1.75787	6.1274e-05	0.679131	1.35835	0.85047	0.815211		0.504167	0.84359	0.963704	0.520573	0.0652297	0.362396	0.912818	0.75823	1.31091	0.573736	0.64399	0.861939	0.519409	1.35335		0.504167	0.95182	0.674881	0.299559	-0.0988865	0.15318	0.588556	0.714187	0.846869	0.263082	1.027	1.65987	0.373479	0.815037
0.505833	0.880352	0.710242	0.185779	0.954405	0.858641	0.875496	1.37733	1.3383	0.241388	0.779599	1.73124	0.677255	0.959149		0.505833	0.730711	0.881427	0.631451	0.541988	0.685915	0.112129	0.418524	0.67307	0.900669	0.876982	0.683452	0.811903	1.10692		0.505833	0.593094	1.04142	0.547043	0.180973	0.462687	0.478157	0.0658935	0.519031	0.948294	0.74886	1.23768	0.328285	0.6301
0.5075	0.636165	0.821291	-0.00398403	1.01904	0.187818	1.72067	0.521319	1.23856	0.696528	0.616611	0.786306	1.0851	0.362033		0.5075	0.82249	1.16015	0.963936	0.419943	0.718224	1.23751	0.864359	1.41598	0.814909	0.67913	1.49866	1.32638	1.0465		0.5075	0.637015	0.256071	0.302751	0.206962	-0.153907	0.67519	1.44144	0.84392	1.22511	0.513118	1.93363	-0.0665233	0.931574
0.509167	0.339024	0.600742	0.466276	1.18946	-0.276655	1.81197	1.4891	1.3671	0.470001	0.253309	1.32272	0.957814	0.85021		0.509167	0.566597	1.13259	1.10803	0.54792	0.624583	1.56585	1.08522	1.1094	0.526526	0.606007	0.847955	0.473946	0.843811		0.509167	0.557936	0.547864	2.59216	1.55851	0.00689185	0.655336	0.363057	0.974363	0.800278	0.291964	1.52753	0.406878	1.08105
0.510833	0.608175	1.05763	0.549274	1.30671	0.172133	1.44675	0.69	1.82748	-0.395234	0.488679	1.05558	1.06068	0.399947		0.510833	0.692866	0.534888	0.795494	1.27027	0.743905	1.18582	0.458601	1.37748	0.612215	-0.201071	0.590112	1.89635	1.1291		0.510833	0.593263	0.577614	0.9245	0.919428	0.731502	0.953691	0.936214	0.801157	0.53657	0.270392	0.865525	0.196279	0.992163
0.5125	0.659122	0.681939	1.0288	1.16201	0.469178	1.17674	0.267507	1.13953	0.190054	0.224028	0.762131	0.87281	0.600823		0.5125	0.735167	0.633514	0.830075	0.190103	0.575031	1.26444	0.639277	0.527695	0.999251	0.852251	0.721075	1.17225	0.961354		0.5125	0.808893	0.240537	0.438756	0.153582	0.794191	1.08209	0.144288	0.762096	1.4496	0.963347	1.26887	-0.0221597	1.21262
0.514167	0.900295	0.688601	0.28703	0.486876	0.534076	0.877641	0.368698	1.45278	-0.02946	1.03014	0.522411	0.909366	0.689119		0.514167	1.10423	0.794208	1.02993	0.0138988	0.75429	1.1449	1.17692	1.13229	0.725086	1.40065	1.17583	1.27699	0.964522		0.514167	0.945138	0.897352	1.37232	0.286507	1.00111	0.631632	0.519789	0.484742	0.571339	0.823485	1.43894	0.132617	0.862891
0.515833	1.24536	0.249683	0.683464	1.32964	-0.366528	1.14625	0.344171	1.26349	0.615375	0.28725	1.58325	1.03773	0.869168		0.515833	0.65368	0.936483	0.376459	0.386118	0.73035	0.434382	0.995995	0.388058	0.949276	1.03961	0.915956	1.52674	1.17223		0.515833	0.396622	0.754286	0.863713	0.445955	0.115615	0.721044	2.00669	0.804631	0.155703	0.50033	1.63778	0.447217	0.4434
0.5175	0.506024	0.478867	0.178878	0.870189	0.340218	1.5617	0.446072	1.18889	0.131004	0.326764	1.06038	0.872489	0.49139		0.5175	0.521496	0.278293	0.449823	-0.0246534	0.771522	1.61354	0.540439	0.15855	0.938712	0.673323	0.892255	1.36301	0.919137		0.5175	0.647361	0.109563	1.30545	0.902346	0.567613	0.804855	0.935799	0.991473	0.608906	0.894254	1.47685	0.237437	1.25772
0.519167	1.19579	0.307901	0.984306	1.25883	0.478906	1.2264	0.0293361	1.56881	0.39264	0.295958	1.34992	0.451992	0.836176		0.519167	0.341829	0.831028	1.46979	0.251539	0.882835	1.0926	0.679507	1.04986	0.57027	0.336756	0.939603	0.877738	0.641092		0.519167	0.868115	0.490852	0.452465	0.0560359	0.706694	0.684375	0.896458	0.260259	0.631173	1.22606	1.6297	0.32533	0.395083
0.520833	1.37775	0.636402	0.506583	0.625485	-0.0459521	0.997838	0.746097	0.621942	0.0922408	0.439938	0.433983	1.18033	1.13731		0.520833	0.459891	0.691623	0.527763	0.265102	0.48796	1.05397	0.991227	1.39501	0.481928	0.527981	0.806229	0.646142	1.03113		0.520833	0.966966	0.631512	0.829422	0.484501	-0.125504	0.601122	0.831502	0.615588	0.508058	0.660749	2.10328	0.39779	0.652461
0.5225	0.472909	0.729332	0.748855	0.964486	0.41951	1.33927	0.806366	1.52285	0.668022	0.272365	1.23202	1.04105	0.751777		0.5225	0.867547	1.2297	0.430394	0.0989708	0.949791	0.903402	0.459857	1.46809	0.480287	1.03248	0.441384	0.437967	0.612616		0.5225	0.52634	0.595369	0.766823	0.455082	0.319413	0.848554	0.496584	0.474639	0.914813	1.04009	1.19103	0.258504	0.676001
0.524167	0.451142	0.451681	0.151631	1.96172	-0.0303828	1.534	0.970195	0.938871	0.0201045	0.1233	0.777207	0.428	0.881038		0.524167	0.771333	1.11224	0.190339	0.469222	0.572889	1.13177	0.82107	0.943531	0.76412	0.551457	0.590887	0.914833	0.2519		0.524167	0.254089	0.826734	0.480336	0.762364	0.876903	0.617626	0.713959	0.511716	1.28249	0.406679	1.62514	0.59643	1.18411
0.525833	1.40084	1.33189	0.342252	0.931421	-0.00305796	1.1695	0.974229	1.24414	0.439411	0.59905	0.425713	1.21425	0.774285		0.525833	0.174634	1.18084	0.726635	0.573284	0.734214	0.853129	1.21088	0.0267155	1.41625	1.43741	0.987909	1.25677	1.28232		0.525833	0.958248	0.86949	0.606202	0.418226	0.270414	0.659911	0.311332	0.455739	0.403945	0.263123	0.761738	0.553428	0.93615
0.5275	1.14289	0.969625	-0.0673764	0.754717	0.423321	1.95041	0.31711	1.50956	-0.106233	0.681973	1.2333	0.673642	0.467144		0.5275	0.721075	0.725952	0.606691	-0.143227	1.00503	0.880357	0.742926	0.976	1.12119	0.226349	0.95267	1.53534	0.899939		0.5275	0.766711	0.847974	1.58213	0.223412	0.533956	0.2832	0.600456	0.697898	1.19801	0.510737	1.81671	0.858548	0.769986
0.529167	0.839966	0.253485	0.535517	1.27769	0.509449	1.2275	1.40512	1.50817	0.110273	0.357293	1.59987	0.771159	0.570373		0.529167	0.443337	1.00043	0.874763	-0.0287852	0.373103	1.19308	0.710319	0.439343	0.763343	0.248002	0.664409	1.01545	0.315617		0.529167	0.835026	0.560802	0.374452	0.216941	-0.163851	0.755842	0.641781	0.86329	0.357214	0.919015	1.37643	0.358794	0.929539
0.530833	0.576835	1.04664	0.329607	1.48891	0.0225207	1.12927	0.942518	2.01525	0.902185	0.370836	1.21839	0.781114	0.480738		0.530833	0.709967	1.0234	0.721562	0.262888	0.379899	0.801327	0.82085	0.846495	1.01922	0.483	0.505784	0.71672	1.14463		0.530833	0.859466	0.5967	0.756378	0.526518	-0.0319461	0.744797	0.527243	0.576535	0.95656	0.652125	1.80333	0.107444	0.385851
0.5325	0.569315	0.60162	0.696353	0.77695	0.371572	1.10437	0.514283	1.2524	0.322441	0.462146	0.815166	0.987433	0.644004		0.5325	0.597958	1.40093	0.647249	0.0278338	1.00893	1.32789	0.777491	1.16302	1.04723	0.690104	0.494358	1.50347	0.864979		0.5325	0.950438	0.501811	0.691204	0.15238	0.234007	0.612397	0.644386	0.969598	0.86704	0.515776	1.27731	0.328875	0.643939
0.534167	0.732466	0.307051	0.435171	1.14998	0.0518378	1.39433	0.606476	1.34195	0.0380256	0.347123	1.14032	0.697092	0.854888		0.534167	0.815433	1.21104	1.01148	0.699411	0.832551	0.864199	0.739473	0.825476	1.06316	0.558037	1.06689	1.09093	1.57043		0.534167	0.780568	0.516729	1.0126	0.227505	-0.419433	0.281873	0.259583	1.02761	0.451092	1.11324	1.26684	0.286938	0.653439
0.535833	1.16031	0.90009	1.51176	0.810639	0.777613	1.39524	1.02943	1.26169	0.788833	0.446202	1.50184	0.43246	0.75712		0.535833	0.477586	0.0670825	0.902314	0.293148	0.999043	1.68731	0.81084	0.311817	0.366412	0.502178	0.464068	0.753178	0.675067		0.535833	0.531703	0.394287	0.978481	0.67629	-0.269366	0.447418	1.32624	0.95057	0.674817	0.453556	1.36172	0.655809	1.0364
0.5375	0.991591	0.684264	0.810375	1.37363	0.138214	0.896805	1.06181	1.65788	0.0860306	0.308667	1.11438	0.790045	1.10919		0.5375	0.700142	1.07124	0.47467	0.293688	0.426339	0.992886	0.706964	0.674384	0.808827	0.719062	1.09163	0.951977	0.589052		0.5375	0.686752	0.9554	1.73943	0.651437	-0.254262	0.192786	0.532399	1.12112	0.639129	0.640064	1.57118	0.72502	1.03649
0.539167	1.1368	0.682041	0.435654	1.02352	-0.076574	1.21457	1.02375	0.835797	0.532121	0.648698	0.742559	0.606162	0.4751		0.539167	0.829187	0.928063	0.70406	0.4231	0.399941	1.13578	0.976998	0.406353	1.11207	1.24343	0.802467	0.648873	1.06374		0.539167	0.263748	0.899734	0.98463	0.780046	0.165425	0.369823	0.435544	0.323185	0.506973	0.785529	0.920528	0.302193	1.09342
0.540833	1.37058	0.762324	-0.12083	0.812043	0.506429	0.93012	0.76462	1.69551	0.884975	0.134087	1.44196	0.934172	0.518181		0.540833	0.772648	0.149474	1.06584	0.0112289	0.949587	1.09942	0.528631	0.90122	0.66905	0.843555	0.730525	0.875698	0.514785		0.540833	0.390252	0.671563	1.72886	0.660882	0.504925	0.993531	0.659207	0.948338	0.953607	1.02328	1.21682	0.630723	0.543545
0.5425	0.8079	0.868883	0.778539	0.464576	1.00131	1.37497	0.929868	0.891783	0.364314	0.666042	1.25329	0.820593	0.659121		0.5425	0.849988	1.19752	1.07617	0.0353038	0.69707	0.582107	0.90527	0.108601	0.666458	1.26143	0.811671	0.510131	0.989056		0.5425	0.593341	0.693802	0.729046	0.690487	0.351076	1.15402	0.401482	0.999631	0.842779	0.500762	1.98834	0.171995	1.07696
0.544167	1.20728	0.912766	0.704834	1.68212	0.55154	1.71793	0.894837	1.47993	0.230782	0.306116	0.858474	0.569688	0.501647		0.544167	0.575742	1.19964	0.586459	0.126032	0.636065	1.17602	0.89955	0.557891	0.527916	0.519592	0.513655	0.4656	0.887874		0.544167	1.1145	0.487795	1.20453	-0.128004	0.2785	0.532368	0.220649	1.17345	0.323919	0.574725	1.84317	0.584745	1.28538
0.545833	1.36426	0.908717	0.431342	0.829731	0.175539	1.44733	0.92854	1.02305	0.251079	0.188395	1.14536	0.465013	1.08664		0.545833	0.368444	0.902168	0.851435	0.457058	0.502019	0.709106	0.681072	0.614172	0.335599	0.683066	0.415646	0.916606	0.68826		0.545833	0.488509	0.214316	0.651227	1.08991	-0.241237	0.331499	0.488779	0.75459	0.285052	0.568389	1.07227	0.324682	0.928375
0.5475	0.528283	0.466477	0.803159	1.59345	0.865999	1.87403	0.735466	1.39488	0.250928	0.573712	1.2955	0.67362	0.338102		0.5475	1.0187	1.15407	0.528669	0.630162	0.493933	1.10061	0.642647	1.0759	0.455628	0.446734	0.28557	1.42011	0.648617		0.5475	0.524797	0.265757	0.277003	0.670343	-0.196453	0.757805	0.786945	0.90938	0.683837	1.23175	1.49065	0.49239	0.821138
0.549167	0.280154	0.917752	0.729989	0.879149	1.18881	1.25881	0.718796	1.00385	-0.141433	0.533596	1.00809	0.847679	0.624354		0.549167	0.839649	1.03304	0.862906	2.11937	0.786196	0.820791	0.724483	0.377995	0.732723	1.08709	1.42603	1.14052	0.810805		0.549167	0.0656469	0.867961	0.597444	-0.0602325	0.361166	0.659294	0.545263	0.746711	0.11028	1.06376	0.711839	0.403251	0.461462
0.550833	0.194117	0.8339	0.200934	1.15915	0.717342	1.69119	0.923194	1.20322	0.616299	0.895852	0.800854	0.706495	0.804595		0.550833	0.46281	0.947114	0.993136	0.713116	0.785179	0.675479	1.13076	0.714154	1.15535	0.77037	0.802064	1.55203	0.547726		0.550833	0.196036	0.809841	0.27736	0.167375	0.178297	0.467916	0.684884	1.28729	0.714625	0.733659	1.15775	0.536025	0.482806
0.5525	1.36288	0.899902	1.20174	0.637809	-0.0197716	1.23313	0.601939	1.3422	0.866767	0.447364	1.17667	1.35054	0.391526		0.5525	0.938589	1.68692	0.957243	0.582806	1.00256	0.597899	0.808223	0.75135	0.762373	0.635626	0.424647	0.722598	1.05459		0.5525	0.477679	0.728429	0.949903	0.676594	0.248722	0.879281	0.154241	0.459941	0.841331	0.447357	1.09151	0.399858	0.773429
0.554167	0.56953	0.518974	0.153376	0.838079	0.715003	1.20691	1.03185	1.40988	-0.145762	0.412669	0.963795	0.54257	0.802193		0.554167	0.797266	0.179941	0.555383	0.356105	0.575558	0.850776	0.528039	0.322669	0.699123	0.549711	0.492854	1.67059	0.699909		0.554167	0.549173	0.895666	0.559514	1.10254	0.289372	0.826009	0.797221	0.345319	0.560733	0.65333	1.14905	0.541794	0.687493
0.555833	0.561199	0.543558	0.286132	0.728457	-0.171153	1.72169	0.0999238	1.50565	-0.0792282	0.47134	0.877515	1.13984	0.776213		0.555833	0.333126	0.552861	0.435256	-0.0950599	0.148636	0.639918	0.859587	0.549043	0.577093	0.797042	1.03174	1.08208	1.01833		0.555833	0.687194	0.553062	0.59031	0.597799	0.607505	0.725849	0.826833	0.311825	0.799217	0.29047	1.25734	0.173254	1.03823
0.5575	0.633353	0.493891	0.567466	1.1854	0.217144	1.03015	0.169207	0.833194	-0.0542642	0.577903	1.29043	0.819055	0.0870966		0.5575	0.606156	0.98363	0.965396	0.0535632	0.631048	0.700755	0.232342	0.726512	0.51835	0.497266	1.17596	1.14427	0.919694		0.5575	0.506207	0.76226	0.896414	0.505043	0.429132	1.35706	0.697865	0.948951	1.00299	0.718091	0.776548	0.521524	0.593351
0.559167	1.34268	0.187067	0.0897123	0.87435	0.198596	0.884713	1.09351	1.14952	0.632758	0.658818	0.753706	0.822226	0.916063		0.559167	0.481516	0.741722	1.0918	0.439293	0.852043	0.874152	0.715293	0.744331	0.560701	0.33687	1.30585	2.06234	0.718877		0.559167	0.709283	0.721976	1.68957	0.156147	0.166742	1.0671	0.76857	0.635499	0.779887	0.685699	1.17225	0.769332	-0.0459027
0.560833	0.802651	0.457733	0.457179	0.342261	0.788329	1.09806	1.49938	1.57958	0.726527	0.493705	1.25484	0.482012	0.819654		0.560833	0.639441	0.473596	0.453593	0.893628	0.213061	0.823397	0.580346	-0.0432015	0.602723	1.17804	1.02156	0.225261	1.09881		0.560833	0.540005	0.304686	0.653114	0.751427	-0.1617	0.550103	0.440828	0.442644	0.583462	0.741135	1.1992	0.652075	1.10328
0.5625	0.814772	0.545245	0.0052048	1.11424	0.0203345	0.953612	0.693935	1.50025	0.303725	0.312598	1.38113	0.316944	0.89865		0.5625	0.667384	0.174842	0.668688	0.923196	0.246609	0.879456	0.904901	0.633109	0.768448	0.496422	0.837964	1.27121	0.629247		0.5625	0.673307	0.822653	0.0701259	0.632955	0.416088	0.515475	0.552092	0.574992	0.194347	0.805387	1.26981	0.171024	0.792336
0.564167	0.957227	0.630411	0.550039	0.797362	0.736896	1.21326	1.1059	2.39983	0.299183	0.545119	1.2918	0.714641	0.809663		0.564167	0.776682	0.943876	0.962043	0.27124	0.803179	0.584472	0.998725	1.43533	0.739879	0.613888	0.83789	0.963693	0.882413		0.564167	0.403073	0.461681	0.861961	0.363986	0.192047	0.547166	0.554579	0.966566	0.764875	0.501585	1.0039	0.110517	1.03142
0.565833	0.792606	0.563051	0.240125	0.815193	0.227631	1.51579	1.01322	1.10394	0.12627	0.37627	0.912273	0.570282	1.04348		0.565833	0.933894	0.928434	1.2121	0.597276	1.03825	0.976327	0.685458	0.914314	0.75562	0.370923	0.729766	0.616594	1.15359		0.565833	0.322425	1.01381	0.845059	0.354051	0.630759	0.786937	0.314954	0.81487	1.06752	0.890968	1.55844	0.277109	-0.0574723
0.5675	1.91708	0.612826	0.318465	1.25997	0.62427	1.21707	0.755944	1.67862	0.145929	0.53616	1.06519	1.47971	0.308724		0.5675	0.911519	0.387543	0.652841	0.73746	0.169934	0.292969	0.55511	0.889129	0.30136	0.719274	0.811775	1.13475	0.786815		0.5675	0.562377	0.512317	1.13804	0.814247	0.508514	0.629969	0.851525	0.214266	0.38913	0.554055	1.75166	0.0221504	0.405092
0.569167	0.901101	0.836515	0.574463	1.14443	-0.0679476	1.19896	1.01228	1.48699	0.386322	0.265675	1.24721	0.947092	0.635109		0.569167	0.702677	0.500627	0.508164	-0.014737	0.270805	0.93029	0.890038	0.669308	1.00011	0.586887	0.708352	0.791032	0.672142		0.569167	0.181344	1.35368	0.83231	0.663784	0.072494	0.330011	0.880398	0.320438	0.430231	0.708167	2.09105	0.110266	0.493479
0.570833	0.387939	0.729363	1.13652	0.805574	0.583643	1.27572	1.42664	1.01257	-0.106953	0.546574	0.940955	0.776039	0.789993		0.570833	0.903401	0.58962	1.38585	-0.201433	0.485068	0.750481	0.890324	0.552795	0.337681	0.951727	0.61078	1.36322	1.03175		0.570833	0.350533	0.920771	-0.0361549	0.0884472	0.414387	0.661565	0.0655301	0.982318	0.166599	1.05152	1.20288	0.989545	0.30003
0.5725	0.643642	0.543501	0.451606	0.907709	0.612479	1.23174	1.21208	1.62236	0.351665	0.514062	0.922606	0.370056	1.19688		0.5725	0.763016	1.22945	1.02334	0.165016	0.461119	1.10131	0.732478	1.025	0.771718	0.578532	0.870227	0.322835	1.17929		0.5725	0.0927622	0.47849	1.46225	0.496681	0.198413	0.538863	0.490182	1.37384	0.81204	0.222119	1.57183	1.29864	0.690434
0.574167	0.918015	1.36832	0.517107	1.46378	0.267876	1.24512	0.986661	1.61082	0.214202	0.509857	1.5157	0.843955	0.596		0.574167	0.5996	1.24397	0.866532	0.327602	0.640779	1.01194	1.08916	0.293953	0.861037	0.339629	1.1297	1.69503	0.977273		0.574167	0.962552	0.758972	0.314117	0.0190448	0.116638	1.88749	0.374615	0.911364	0.561385	0.694911	1.35141	0.424304	0.982053
0.575833	0.746907	0.231438	0.429074	0.692176	0.074149	1.51601	0.953864	1.00286	0.241165	0.187982	0.758885	0.659225	0.406122		0.575833	0.65308	1.63999	0.63049	0.681994	0.521899	1.43087	0.724248	1.10935	0.908592	0.464192	0.718125	0.218462	0.651685		0.575833	0.48386	0.635463	2.05053	0.409964	0.49313	0.666409	0.424501	0.713051	0.971818	0.31424	0.685041	0.216807	0.562801
0.5775	1.67828	0.331544	0.760066	1.08904	0.873133	1.46719	1.25013	1.27894	0.236647	0.37108	0.841875	0.529684	0.374548		0.5775	0.682669	1.51685	0.770365	1.04538	0.81103	1.01807	0.524076	-0.241669	0.233402	1.01516	1.08949	1.32935	1.15807		0.5775	0.372276	1.41387	0.873546	1.08819	1.17471	0.974638	0.0482852	0.317058	0.653767	0.933409	1.64537	0.5387	0.420944
0.579167	0.577942	0.829566	-0.127171	1.75294	0.53166	1.10466	0.727607	1.67192	0.0195165	0.40356	0.560678	0.942962	0.543845		0.579167	0.58219	2.29094	0.576701	0.588646	0.231843	0.110651	1.0834	0.74266	0.99629	0.629549	0.637713	0.327238	0.691013		0.579167	0.742591	0.585366	0.44543	0.630612	0.462109	0.982704	0.250576	0.733723	0.836131	0.523274	1.42601	0.434641	0.898181
0.580833	0.310062	0.359705	0.736262	1.52531	0.956356	1.07806	0.365626	1.00728	0.277824	0.750297	0.854099	0.694867	0.863231		0.580833	0.993778	0.809448	0.546866	-0.0982683	0.499802	1.6615	1.13795	1.35085	0.626357	0.262269	1.61172	0.757356	0.575619		0.580833	0.417628	1.06476	0.584351	0.444749	-0.35177	0.97272	0.494135	0.518571	0.699629	0.401678	1.36224	0.353771	1.17453
0.5825	0.718705	0.562359	0.438429	1.0924	0.0525308	1.27601	0.816911	1.5194	0.553414	0.145412	1.28158	0.819218	0.904919		0.5825	0.682504	1.19746	0.602961	-0.129854	0.693408	0.500228	0.931927	0.455876	0.293828	0.437815	1.0107	1.22409	1.05893		0.5825	0.988282	0.779325	0.497599	0.579437	0.271382	0.662208	0.466434	0.109027	0.485852	0.567408	1.24536	0.200116	0.44838
0.584167	1.05986	0.710524	0.429706	0.990675	-0.427545	1.69293	1.33191	1.84502	0.121053	0.460723	1.12367	0.940302	1.15212		0.584167	0.894415	1.31586	0.855076	0.12802	0.482808	1.73388	0.659504	0.93448	0.250083	0.803289	0.712589	1.10588	1.06799		0.584167	0.718507	0.511891	1.31937	0.714286	0.373787	0.5826	0.169875	1.33441	0.833616	0.740425	1.3668	0.202918	1.1267
0.585833	1.46919	0.542311	0.738246	1.04238	0.515359	0.895752	1.17178	1.51191	0.29199	0.895516	0.822119	0.898315	0.580733		0.585833	0.762999	0.654171	0.405332	0.252122	0.658104	0.702982	0.556724	0.120602	0.708924	0.637126	0.567141	0.997603	0.782258		0.585833	0.613758	0.697943	1.64793	0.966165	0.642699	0.822455	1.04673	1.39964	0.75411	0.415695	1.0895	0.581045	0.17573
0.5875	0.634646	0.355753	0.236925	0.810528	0.319451	1.1368	0.760347	1.12596	-0.0412477	0.732631	0.844345	0.704846	1.1329		0.5875	0.769297	1.11802	0.127348	0.372998	0.597053	0.746801	0.344071	1.12657	0.803162	0.253739	0.412496	0.65445	1.3504		0.5875	0.803047	0.373667	0.569859	0.184758	-0.502284	0.502381	0.153895	0.622416	-0.16816	0.828816	1.15529	0.538979	1.51707
0.589167	1.40048	0.253394	0.50263	0.650463	0.124502	1.75943	0.986077	0.913868	0.543782	0.464018	0.854445	1.23935	0.793583		0.589167	0.79423	0.831857	0.49184	-0.0563522	0.741258	1.46386	0.764688	0.946101	0.90473	0.630116	0.712728	0.553219	0.396859		0.589167	0.676972	0.598124	0.592939	0.422989	0.227377	0.918195	0.145995	1.98768	0.482563	0.363306	1.11207	0.395335	0.669202
0.590833	0.556695	0.559157	0.901344	0.53872	0.711382	1.19794	0.598317	1.24326	-0.473529	0.457999	1.32956	0.383964	0.991038		0.590833	0.948788	1.14221	1.21727	0.174817	0.631566	1.01613	0.6427	0.640536	1.35341	0.633779	1.25335	1.34707	0.40142		0.590833	1.09369	0.957936	1.2977	0.14346	0.409584	0.878716	0.465217	0.429056	1.2423	0.765245	1.77592	0.0429923	0.965881
0.5925	1.16285	0.353232	0.442514	1.02443	0.23125	1.46131	0.628497	1.66874	0.411315	0.105363	1.4457	0.632911	1.07395		0.5925	1.1077	1.01018	0.639918	0.485179	0.6834	1.14897	0.545943	1.05261	1.07806	0.727189	0.328314	0.534124	0.66421		0.5925	0.51353	0.794503	2.45602	0.0146705	0.840143	0.546042	0.128108	0.63196	0.60429	0.487601	1.22788	0.0888178	0.636249
0.594167	0.278827	0.318127	0.02982	0.947786	0.372015	1.01952	0.211118	1.22123	0.150478	0.463548	0.792542	0.802389	0.517911		0.594167	0.525268	0.749707	1.06303	0.414579	0.237325	0.758713	0.609679	0.543496	0.712654	0.612763	1.03941	1.38504	0.971251		0.594167	0.561482	0.679463	0.956781	0.721245	0.386097	0.311402	0.846496	0.55023	0.998839	0.835189	1.13471	0.24161	0.112204
0.595833	0.778521	0.561494	1.24679	1.35038	0.377095	1.5471	0.38404	1.39801	0.372641	0.687536	1.39473	0.712906	0.885347		0.595833	0.781199	0.500279	0.985335	0.728864	1.17783	0.62161	0.639522	0.817798	1.09779	0.818867	1.30887	1.0818	0.953794		0.595833	1.27842	0.527264	0.779737	0.244699	1.40276	0.821728	0.219161	0.78747	0.997235	0.880669	1.14127	0.236087	1.19809
0.5975	2.31804	0.679362	0.39294	1.58706	-0.0167089	1.84686	0.702162	1.26848	0.25	0.593686	1.3005	1.06225	0.600201		0.5975	0.331228	0.348902	0.8077	0.535972	0.43631	0.966242	0.738521	0.577724	0.47832	0.135743	0.77991	1.28366	1.15885		0.5975	0.695644	0.271927	0.964927	0.398957	0.0914415	0.506853	0.931799	1.35026	0.580993	0.60967	0.908348	0.48139	0.955699
0.599167	0.632324	0.669358	0.653864	0.56706	0.696288	1.42854	0.649963	1.47263	-0.104019	0.311844	1.2122	0.771775	1.00198		0.599167	0.131521	-0.246278	0.661638	0.769339	0.685768	0.824127	0.379395	0.954162	1.0453	0.524616	0.844684	0.0252762	1.23054		0.599167	0.560149	0.479794	0.860338	0.538916	-0.000187516	0.922896	0.419996	0.660182	0.846209	0.312591	1.07037	0.359898	1.53318
0.600833	1.06241	0.596954	0.293179	0.920608	0.144953	1.5999	0.692427	1.08464	1.06974	0.377232	1.19939	0.615633	0.603761		0.600833	0.703467	0.598385	0.816128	0.447421	0.0429969	0.315846	0.774496	0.675752	0.885395	-0.0128967	0.607692	0.764501	0.969769		0.600833	0.56746	0.290951	1.31667	0.422662	0.177112	1.26984	0.707942	0.384344	0.361759	0.747249	1.16268	0.242195	0.547632
0.6025	0.381656	0.851771	0.523262	1.21709	0.458619	1.26979	0.692772	0.879213	0.203115	0.317709	1.09462	0.477816	0.69732		0.6025	0.416089	0.609822	0.453701	1.21121	0.649646	0.286202	0.639686	0.886273	0.890656	1.4351	1.0028	0.280648	0.739707		0.6025	0.544585	0.842205	0.978218	1.29333	0.37869	0.603827	0.443841	0.28045	0.775287	0.607698	2.19509	0.155428	0.748252
0.604167	1.29159	0.267666	0.885427	1.42101	0.60922	1.24123	0.670423	1.35802	-0.122239	0.513721	1.14229	0.549664	0.236748		0.604167	0.311305	0.987281	0.754198	0.644669	0.64611	1.17444	0.921369	0.760265	0.633392	0.227284	0.973085	0.740355	0.906504		0.604167	0.305057	0.965603	0.498689	0.264493	0.557208	0.930696	0.981253	1.10375	0.63158	0.861126	1.22939	0.0834011	0.634968
0.605833	0.735156	0.532154	-0.245478	0.693902	0.518987	0.816822	1.34628	1.63958	0.348884	0.780591	1.00413	1.11987	0.497739		0.605833	0.260151	0.517286	0.77657	0.871686	0.688644	1.53014	0.499902	0.114923	0.759911	0.912129	1.26979	0.955763	0.769007		0.605833	0.659736	0.308078	1.03274	0.430157	0.0597624	1.04577	0.035286	0.814978	0.753425	0.540541	1.1819	0.30458	1.01776
0.6075	0.317252	1.17922	0.846127	1.2027	0.807855	1.45827	1.12609	1.32272	-0.15617	0.295989	1.22596	1.16219	0.671068		0.6075	0.975978	1.39823	0.442155	0.106421	0.780437	0.754854	1.19592	0.9287	0.92191	0.276973	0.997716	1.28223	0.849816		0.6075	0.689885	0.559429	0.716523	0.756466	0.490977	0.799764	0.120545	0.550964	1.26912	1.15785	1.83795	0.317675	0.981337
0.609167	0.504373	0.77101	1.10227	1.18425	0.942723	1.34138	0.966349	1.78505	-0.179621	0.562664	1.50794	0.817337	0.671839		0.609167	0.338364	0.849032	0.345677	0.177516	0.964912	1.41207	0.763456	0.390965	0.486083	0.568694	1.14488	1.31434	1.18059		0.609167	0.191681	1.11527	0.329728	0.365321	0.716627	0.573553	0.350292	0.928838	0.416616	0.698747	3.23736	0.392174	1.44266
0.610833	1.15987	0.310244	0.709553	1.30961	0.161747	0.80005	1.14154	1.12629	0.25329	0.710955	0.978963	0.891755	0.89644		0.610833	0.842628	0.467573	1.02984	0.289088	0.0635822	0.602775	0.595529	0.524136	0.671845	0.308842	0.436824	0.951761	1.22457		0.610833	0.657524	0.801282	0.154299	0.166887	0.0992153	0.693932	0.478434	0.34844	0.419324	1.14655	0.949153	0.307537	1.25153
0.6125	0.315678	0.366913	0.625835	0.470015	0.398019	1.40668	0.438676	1.32697	0.302216	0.348768	1.27978	0.819787	0.652632		0.6125	0.780083	0.805326	0.43081	0.726505	0.629655	0.533473	0.483407	0.973919	1.00265	0.878279	0.963928	0.728239	0.646574		0.6125	1.08279	0.806325	0.532698	-0.053343	-0.150993	0.761814	0.833079	0.447752	0.50868	1.28334	1.30563	0.488551	0.681464
0.614167	0.508588	0.0199964	0.394793	0.952732	0.48463	1.10573	0.829636	1.674	-0.436678	0.485416	0.966205	0.506866	1.09635		0.614167	1.0258	1.2712	0.673518	0.619261	0.933889	0.96455	0.829611	0.0969075	0.978807	0.992381	0.950983	0.689831	0.726465		0.614167	0.658018	0.450209	0.693519	0.719186	0.222919	1.09854	1.09151	0.624556	0.416311	0.841349	1.36624	0.0852933	0.815541
0.615833	0.559218	1.24322	0.206596	1.11104	-0.0512805	1.18419	1.06865	1.15743	-0.338228	0.369284	1.22223	0.913547	0.525067		0.615833	0.472622	1.43388	0.47119	0.777557	0.681648	0.895863	0.656015	0.564184	0.72196	0.71825	0.783733	0.948136	1.23089		0.615833	0.372249	0.647487	0.426225	0.0293022	0.342111	0.703204	0.529085	0.816939	0.394427	0.316434	1.14632	0.235078	0.721911
0.6175	1.20132	0.827079	0.511666	1.58727	-0.221228	1.69162	0.905156	1.33347	-0.0593252	0.443787	0.78433	0.856879	0.942083		0.6175	0.822332	0.807242	0.573635	-0.270198	1.12455	1.30574	0.616182	0.787386	0.755081	0.0913457	1.19635	0.54533	0.760206		0.6175	0.640266	0.579225	0.698931	0.340659	-0.422562	1.04099	-0.273624	0.600814	0.684061	0.934665	1.11294	0.593459	1.43442
0.619167	0.373833	0.758959	0.382016	0.702023	0.459717	1.24266	0.906655	1.23395	0.238065	0.484792	1.55754	0.273548	1.00113		0.619167	0.377803	0.723991	0.556545	0.227811	0.387005	0.367989	0.0208134	0.470244	0.626305	0.684459	0.866386	0.703004	0.957177		0.619167	0.559284	0.703266	0.607026	0.00823748	0.203726	0.594985	0.788986	0.777778	0.949059	0.392419	1.51924	0.176999	1.42825
0.620833	1.25353	0.574571	0.88548	0.662294	0.317987	1.25117	1.83708	1.74916	0.245356	0.422155	1.03533	1.01478	1.17126		0.620833	0.722559	0.746254	0.747909	0.207655	0.414485	0.916892	0.568601	0.332731	0.87936	0.587582	0.693782	1.37763	1.04419		0.620833	0.26976	0.662559	0.974441	0.245651	0.223198	0.689863	0.756603	0.945139	0.520862	0.665853	1.36331	0.321062	0.814499
0.6225	0.812854	0.517845	1.33393	0.674632	0.0711586	1.7794	1.06955	1.50532	0.599215	0.684229	0.930072	0.893	1.32939		0.6225	0.752875	1.40869	1.2886	0.118523	0.461042	0.474769	0.828289	0.81726	0.798454	0.989502	0.784433	1.03519	0.474706		0.6225	0.82592	0.269654	0.895359	0.0576648	1.43393	0.40149	-0.325368	0.425722	1.15116	0.380893	0.921038	-0.064277	0.678641
0.624167	0.570925	0.944132	0.77683	0.983413	0.475775	1.0644	0.440033	0.868361	0.689189	0.890736	1.13524	0.389167	0.886469		0.624167	0.994937	0.979734	0.545541	0.0850223	0.371975	0.720009	0.668031	0.772743	0.289149	0.88655	0.77118	1.31294	1.48088		0.624167	0.394203	0.874164	1.17138	0.135658	0.185701	1.02872	0.607263	0.65505	0.502766	0.853597	1.90724	0.431388	0.952405
0.625833	0.953964	0.678803	0.76244	0.593963	1.43355	2.07381	0.579843	1.67063	0.37334	0.354034	0.962283	0.516436	0.401734		0.625833	0.661095	0.463058	1.24226	0.797344	0.814332	0.995494	0.515398	0.391172	0.645939	1.51433	0.747656	0.885787	0.42653		0.625833	0.380726	0.512466	0.611296	-0.0759482	0.0144631	0.431295	0.846603	0.802481	1.02818	1.32598	0.6664	0.346395	1.15712
0.6275	1.24244	0.448823	0.376628	0.970811	0.492581	1.10352	1.312	1.74795	-0.162374	0.419226	0.920213	0.506229	1.00726		0.6275	0.978091	0.441046	0.485941	0.110129	0.777689	0.459791	0.662139	1.1487	0.666542	0.35028	1.16597	0.361864	1.01928		0.6275	0.995393	0.331971	0.417481	0.419461	0.0483538	0.702801	-0.0893124	0.766216	0.626122	0.961711	0.963046	0.632885	1.01018
0.629167	1.75739	1.28213	-0.396474	0.743905	0.275238	1.35543	0.542834	1.23688	0.272804	0.507089	1.09049	0.820962	0.399093		0.629167	0.610674	0.586127	0.800363	-0.0775286	1.01384	0.644025	0.465323	0.397654	0.769295	0.417374	0.79224	0.562467	1.14528		0.629167	1.0631	1.24421	-0.115201	0.278942	0.575621	0.649562	0.833556	0.920515	0.471014	0.113711	1.60206	0.377667	0.532959
0.630833	1.37147	0.70319	0.768096	0.706895	0.282337	0.385356	0.58366	1.31884	0.285774	0.728317	0.885065	0.701818	0.724267		0.630833	0.175801	1.13791	0.984296	1.14163	0.530729	0.622258	0.433481	0.939414	1.36565	-0.183656	0.611376	1.04597	0.559527		0.630833	0.661783	0.532243	0.645627	0.385798	0.660387	0.577664	0.209429	0.637959	0.720108	0.549853	1.33382	0.428614	0.833661
0.6325	0.771554	0.65749	0.277254	1.13056	0.412711	1.64706	1.23387	1.49963	-0.112501	0.918619	0.60691	0.927132	0.514084		0.6325	0.940165	0.354195	0.440218	0.0713255	0.543285	0.951155	0.721103	-0.0788346	0.58904	1.07752	0.796281	1.01719	0.666223		0.6325	1.61611	0.6901	0.468751	0.606684	0.309177	0.609358	0.273801	0.843863	1.34788	1.38253	1.49798	-0.0219327	0.661056
0.634167	1.04879	0.643113	0.826665	0.624368	0.431591	1.21649	0.729582	1.55263	0.476108	0.336255	0.698753	0.607014	0.697291		0.634167	0.75766	1.06122	1.0222	0.323873	0.794827	0.706074	0.820894	0.553781	0.832555	0.730411	0.938414	0.287305	1.0539		0.634167	0.562825	0.480423	0.891981	0.916198	-0.0305729	1.08099	0.77581	0.794332	0.53098	0.9795	1.21548	0.0883841	1.5221
0.635833	0.78639	0.489653	0.582759	1.08898	0.745904	1.54432	0.571076	1.68457	0.82391	0.501463	0.871333	0.431916	0.963824		0.635833	0.6528	0.469553	1.31006	0.527339	0.476407	0.963076	0.469043	0.575273	1.08758	0.900812	1.04245	0.335615	1.46646		0.635833	0.803914	0.409659	1.47744	0.572293	-0.41992	0.972321	0.112276	0.714406	1.18241	0.877401	1.70512	0.471001	0.304283
0.6375	0.712622	0.389624	0.373207	1.16412	0.13645	1.69909	0.83778	1.68564	0.55423	0.666681	0.863922	0.299077	0.380461		0.6375	0.499421	0.707373	1.07937	0.733615	0.505073	1.00847	0.64792	0.61079	1.05748	1.37313	0.756937	1.09169	1.09464		0.6375	1.50487	0.5502	0.939279	0.607343	0.451583	0.831379	-0.0465459	0.686518	0.0858235	0.586881	1.31573	0.361556	0.0656576
0.639167	0.572995	0.474432	0.737914	1.08596	0.0808887	1.4	0.913677	1.94907	1.31531	0.683279	0.566632	0.676133	0.698858		0.639167	0.266193	0.656349	1.04051	0.98392	0.593289	1.19298	0.598333	1.13843	0.397149	1.21028	0.65455	0.774776	0.897206		0.639167	0.870781	1.11381	1.26419	0.331844	0.688042	0.776642	1.05317	0.479476	0.514734	0.323453	1.11067	0.278964	0.425957
0.640833	0.768215	0.626423	0.295777	1.1506	0.721168	1.08589	1.10941	0.699214	0.0399864	0.556519	1.28624	1.11673	0.881076		0.640833	0.540739	0.537562	0.830441	0.478643	0.610128	1.7374	0.363294	0.267155	0.871914	0.362634	1.3369	1.3041	0.673415		0.640833	0.419033	0.763715	0.885119	1.12579	0.140831	0.540997	0.410002	0.752603	0.569823	0.684899	1.31915	0.313459	0.554328
0.6425	0.92838	1.00253	0.597065	0.922026	-0.0523217	1.22136	0.550227	1.22355	0.283139	0.462992	1.06835	0.867735	0.973899		0.6425	0.40923	1.09345	0.6813	0.146107	0.93523	0.637412	0.352156	0.891163	0.67837	-0.0370006	0.935633	0.421553	0.859773		0.6425	0.257142	0.521478	0.749585	0.644523	-0.0146352	0.765245	0.384555	1.25068	0.763747	-0.0467104	1.07169	0.431828	0.495064
0.644167	0.50719	1.08088	0.578242	0.866734	1.21605	1.65118	0.92431	1.30359	0.791057	0.543535	0.990621	0.680673	0.320431		0.644167	0.636821	0.495524	1.02718	0.902123	0.645925	0.952362	0.271654	0.870123	0.645202	0.611863	0.77401	1.31255	0.471163		0.644167	0.639942	0.463228	0.72449	0.74732	0.855484	0.401174	0.576989	0.599238	0.380792	1.00583	1.1678	0.171943	1.32064
0.645833	0.767913	0.919845	1.04467	0.587618	0.213963	1.29704	0.823501	1.31579	0.443635	0.618522	0.952865	0.702916	0.908434		0.645833	0.776557	0.645396	1.06768	0.374452	0.323464	1.55436	0.54966	0.85371	1.08345	1.23276	0.970082	0.946734	0.911133		0.645833	0.305609	0.989801	1.64646	0.274271	0.209627	0.691175	0.553398	1.08786	0.538976	0.684556	1.43323	0.336339	0.399733
0.6475	1.3332	0.346776	0.482629	0.863558	0.382468	1.29081	0.969029	1.67662	0.158968	0.311119	1.34601	0.0450745	0.646817		0.6475	1.12224	0.741605	0.565709	0.442519	0.575632	0.450342	0.587581	1.10623	0.874727	0.232888	0.934912	0.85964	1.01714		0.6475	0.481045	0.906057	0.299207	0.990202	0.249284	0.539211	0.691685	0.449611	0.970378	0.527414	1.07031	0.376015	1.27816
0.649167	1.00388	0.89906	0.714144	0.767477	-0.0346273	1.3399	0.483137	1.93066	0.523004	1.10594	1.64899	1.1864	0.613523		0.649167	0.864528	0.70018	0.890143	0.6502	0.742261	0.82704	0.817528	1.23573	0.751817	0.708921	0.669272	1.10044	0.998598		0.649167	1.02623	0.635491	0.530589	0.783866	-0.234367	0.457556	0.912371	0.463959	0.642071	0.796631	1.6058	0.221936	1.8182
0.650833	0.904226	0.30993	0.289435	0.889755	0.0870601	1.52701	0.255222	1.40618	-0.277427	0.252446	1.35694	0.676117	0.410349		0.650833	0.574903	1.34822	0.427579	0.246442	0.373709	0.459918	0.593585	0.79821	0.995334	0.499282	0.556281	1.15929	0.673741		0.650833	1.25906	1.05094	2.97588	0.419617	0.18263	0.412344	1.07388	0.678153	0.88457	0.337321	1.30607	0.306493	0.799887
0.6525	0.0858456	0.524758	0.539629	0.903163	0.354767	1.09117	0.391803	1.39343	-0.190732	0.406478	0.971879	1.34028	0.254485		0.6525	0.663258	0.875659	0.509695	0.133133	0.667945	0.307389	0.584771	1.83304	0.876186	0.625639	0.340035	0.83154	0.968176		0.6525	0.800659	0.541712	1.64437	1.00336	0.428007	0.897551	0.749322	0.483905	0.039731	1.12724	0.875166	0.579982	0.48217
0.654167	0.878679	0.689151	0.915297	0.715323	0.0112492	1.09867	1.65752	1.5629	-0.216135	0.768	1.01905	1.1401	0.591405		0.654167	0.283373	1.9366	0.570151	0.659986	0.153146	0.724939	0.624883	1.2541	0.344019	0.943988	0.13031	1.50426	0.63523		0.654167	0.810563	0.636971	0.613607	0.3092	0.681882	1.08126	0.143523	0.680675	1.31731	0.896985	1.64853	0.595643	0.760716
0.655833	0.648561	0.310746	0.330387	1.16573	0.105206	1.23585	0.475631	1.60428	0.107142	0.593698	0.879187	0.546336	0.65445		0.655833	0.375259	1.69903	0.877945	-0.0803	0.261239	1.03609	0.521518	0.796407	1.1484	0.539679	0.104958	1.12806	0.916705		0.655833	0.311416	0.624025	0.319347	0.42564	1.0966	0.604217	0.529286	0.957243	0.788277	0.858098	1.65711	-0.0218646	1.4206
0.6575	1.44025	0.271416	0.28238	1.05191	0.829343	1.18599	1.04516	0.885831	0.118151	0.587927	0.884865	0.504762	0.473169		0.6575	0.725607	0.794129	0.511967	-0.0304767	0.920098	0.666018	0.774237	0.814763	0.481413	0.571893	1.64541	0.569005	0.85731		0.6575	0.60343	0.870038	0.369125	0.543747	0.149069	0.53508	0.128692	0.497399	0.236335	0.640672	1.04114	0.261974	0.459693
0.659167	0.84521	0.845256	0.693834	1.21889	1.02466	1.04343	0.560907	1.5573	-0.204455	0.345528	0.657295	0.612273	0.805614		0.659167	0.428082	1.12287	1.12752	0.398134	0.532572	1.30562	0.536514	0.447022	0.722328	0.350154	0.704923	0.718818	0.927859		0.659167	0.425351	0.75059	0.948325	0.288151	0.554399	0.986426	0.398601	1.14518	0.659714	0.692351	1.50957	0.570225	0.981264
0.660833	0.603833	1.22845	-0.0972742	0.721715	0.32357	1.19924	1.67695	1.16166	0.476784	0.738303	0.960656	0.730768	0.799067		0.660833	0.284165	0.322474	0.800502	0.135543	0.478334	1.36463	0.68667	1.35359	0.532277	1.19126	0.849174	0.732663	1.07434		0.660833	0.475029	0.634754	0.0148476	0.116719	-0.189613	0.461748	0.506695	0.939987	0.228366	0.54689	1.14055	0.499273	0.820281
0.6625	1.60064	0.455477	0.274739	1.5025	0.335504	1.7378	0.302292	1.83181	0.578768	0.723681	0.943605	0.929027	0.664894		0.6625	0.3791	1.7431	0.42877	0.550704	1.07601	1.01591	0.751831	0.827878	0.832882	0.721393	0.929067	1.29324	0.730003		0.6625	0.157746	0.797683	0.396927	0.069052	-0.000945091	0.388149	0.883892	1.29747	0.726046	0.714105	1.46186	0.177081	0.710901
0.664167	1.2743	0.401566	0.311461	0.995109	0.508292	1.57944	1.61672	0.992064	0.640536	0.272794	1.20001	0.888119	0.723367		0.664167	1.07811	0.969046	1.23302	0.198595	0.85556	0.761028	0.883048	0.367492	0.978453	0.612498	0.884056	0.824198	1.08377		0.664167	0.129361	0.992213	0.800585	0.731967	0.815956	0.476003	0.871491	1.02272	0.476175	0.638036	0.869953	0.616956	1.29075
0.665833	0.598439	0.358862	0.408115	0.45564	0.668633	1.09002	0.45621	1.92942	0.145905	0.554797	1.09582	0.734819	0.472539		0.665833	0.482023	0.967639	0.944774	0.872848	0.407953	0.849917	0.750406	1.04852	1.00192	0.492763	0.94646	0.783687	0.723395		0.665833	0.87806	0.478927	0.817054	0.38022	0.923495	0.368484	0.51541	0.566054	0.334104	0.587372	1.64023	0.352734	1.0434
0.6675	0.625321	0.904504	0.491933	1.12784	0.565671	1.74914	0.104046	1.1969	0.118026	0.209921	0.982791	0.973818	0.54163		0.6675	0.711009	1.32048	1.08213	0.283378	0.555354	0.644844	0.730536	0.794401	0.963492	0.717033	1.00483	0.8734	1.26483		0.6675	0.700848	0.66714	0.478339	0.397838	-0.0374691	0.960717	0.651671	0.692401	0.81042	0.82224	1.64094	0.372554	1.4022
0.669167	0.732885	0.350971	0.653257	0.957426	0.424591	1.87537	0.789592	1.35896	0.418558	0.270063	1.08406	0.672963	0.585556		0.669167	0.693823	1.61031	1.04089	0.172936	0.959421	0.329531	0.502734	0.550585	1.09943	1.30913	0.786565	1.28707	0.793933		0.669167	0.750734	1.02459	0.912174	0.0258383	0.26161	1.105	0.298758	0.437378	0.336392	0.88065	1.60303	0.753579	0.659996
0.670833	1.37692	0.772346	0.311743	0.69031	1.35794	1.16543	0.226818	1.7413	0.826196	0.565149	0.669666	0.734983	0.958731		0.670833	1.26274	0.200306	0.74768	1.39572	0.492896	0.640994	0.603422	0.708572	0.701277	0.964085	0.981033	1.10777	1.28375		0.670833	0.856277	1.07887	0.811074	0.298729	0.0638963	0.602695	0.469095	0.564481	0.698273	0.960937	1.12578	0.264009	0.662794
0.6725	1.11421	0.602209	0.164345	0.46553	-0.191408	0.629287	0.86548	1.21318	0.202795	0.557368	1.31007	1.01459	1.15592		0.6725	0.628578	0.561017	0.608656	0.615773	0.276061	1.36442	0.570113	0.815994	0.962444	1.22246	0.564077	1.18659	1.06807		0.6725	0.901892	0.626445	0.879237	0.312703	-0.364678	0.805546	0.359128	1.06466	0.476602	0.451427	1.21468	0.51742	0.944516
0.674167	1.03212	0.246189	0.336643	0.766951	0.751862	1.57003	0.616915	1.6947	0.524642	0.726542	0.802387	0.379134	0.715246		0.674167	0.61973	0.984455	0.787469	-0.097806	0.700112	0.451858	0.791122	1.02412	1.00699	0.523097	1.07579	0.5117	0.622885		0.674167	0.275767	0.276584	0.612036	0.136096	0.515732	0.835845	0.696605	0.61114	0.539228	0.517051	0.922854	0.719683	1.67522
0.675833	1.38346	1.26994	0.743869	0.551513	1.20218	1.35352	0.613192	1.55201	0.250026	0.171251	0.995293	0.0662325	0.479533		0.675833	0.69694	1.2104	1.13834	0.906104	0.725849	1.41962	0.845309	0.926866	0.834975	0.837873	1.02757	1.31391	1.28071		0.675833	0.263806	0.303444	1.37421	-0.501496	0.275045	1.05954	0.825982	0.618087	0.680162	0.34559	1.58514	0.55902	0.991581
0.6775	0.434783	0.829824	0.00307334	1.2562	0.0341672	1.28229	0.93663	1.1302	0.276685	0.167764	1.09378	0.55077	0.728348		0.6775	0.632383	1.04812	0.594644	0.201002	0.886446	0.413615	1.13156	0.469331	0.784963	1.1541	0.732348	1.03395	0.555304		0.6775	0.659355	0.421006	0.746743	0.529754	0.507303	1.27576	0.903527	0.938527	0.574697	1.11729	1.49247	0.488531	0.963565
0.679167	0.607314	0.461081	1.25489	1.36266	-0.00772083	1.07476	0.904645	1.58584	0.247894	0.359492	1.15868	0.574636	0.937964		0.679167	0.781913	-0.115622	0.59859	-0.067937	1.0397	0.682178	0.833212	1.06598	0.552604	0.894682	0.744665	1.15621	0.576761		0.679167	0.716348	0.704646	1.33064	0.809193	0.0517242	0.61062	0.400409	0.912022	-0.195879	1.25408	1.14213	0.176499	1.34579
0.680833	1.60571	1.0723	0.675263	0.785696	0.228086	1.54154	0.5472	1.44164	0.0867747	0.376845	0.928917	0.881601	0.524329		0.680833	0.731529	1.61572	1.13347	0.309309	0.62196	1.29621	0.909467	1.11669	0.563392	-0.0180382	0.891905	0.74767	0.572313		0.680833	0.734688	0.237612	0.470422	0.787236	0.842022	0.986421	0.407279	0.301815	0.593678	0.498504	1.66004	0.546783	0.688893
0.6825	0.654751	0.376073	-0.0433119	1.17024	0.533898	1.6034	1.33664	0.744776	0.398601	0.357008	1.70295	1.02759	0.757838		0.6825	0.506207	0.835802	0.355864	0.729671	0.505173	1.38815	0.774243	0.7973	0.636173	0.378813	0.806863	0.385721	0.923807		0.6825	0.681292	0.420001	2.44429	0.489594	-0.204076	0.403671	1.24088	0.981076	1.01443	0.723589	0.736443	0.350769	0.942502
0.684167	1.0066	0.757157	-0.0196078	0.625208	1.27437	1.2282	1.43219	1.17123	0.541025	0.469433	1.22565	1.09999	0.489278		0.684167	0.452274	0.651417	1.36624	0.395857	0.654465	0.864272	0.645457	0.997705	0.740349	0.797042	0.919983	0.692292	0.791057		0.684167	0.680959	0.435076	0.454385	0.0150782	0.96946	0.356155	0.225095	1.07463	0.478382	1.08267	0.979105	0.390506	1.49443
0.685833	0.28866	0.593096	0.288202	1.16939	-0.201824	1.28124	0.948187	1.36586	0.101975	0.550486	0.471853	0.778656	0.447609		0.685833	0.873989	1.0907	0.910767	0.111225	0.357165	0.660198	0.481313	0.514332	0.340028	0.447585	0.588517	0.733102	0.892115		0.685833	0.465044	0.373274	0.939223	0.164797	0.443677	0.297594	0.330939	1.24351	0.271186	0.982902	1.15971	0.196794	0.801642
0.6875	0.236738	0.464066	0.732646	0.884841	0.726053	1.72458	1.04065	1.1869	-0.172256	0.0628799	1.15374	0.755976	0.858837		0.6875	0.379244	0.635253	0.77308	0.328076	0.584239	0.657375	0.793344	0.612036	0.850129	0.822665	0.825979	1.07002	0.889054		0.6875	0.588328	0.47924	1.21773	0.433431	0.827554	0.336	0.436719	0.410252	0.798479	0.871781	1.3791	0.538551	1.24819
0.689167	0.713597	0.398933	0.942726	1.9067	-0.00481665	1.48832	0.141644	1.04513	-0.0956126	0.0214032	1.0689	1.15707	0.386258		0.689167	1.07342	0.773013	0.593185	0.169048	0.49117	0.778063	0.432419	0.277831	0.728438	1.3306	1.28551	1.24817	0.814001		0.689167	0.858648	0.599212	1.68817	0.940795	-0.128196	0.710243	0.266919	0.773778	-0.0494087	0.315977	1.3811	0.70933	0.667074
0.690833	0.836644	0.535873	0.404494	0.991187	0.264351	1.05544	0.573645	1.13938	-0.167586	0.401233	0.505721	1.35954	0.531997		0.690833	0.496177	0.515346	0.733787	2.57209	0.89276	0.707269	0.522805	0.653169	0.906122	1.24733	0.605183	1.46216	0.901789		0.690833	0.38842	0.962649	0.944293	0.565704	0.233993	0.58142	0.678209	0.821055	0.602044	0.62595	1.16292	0.10794	0.452235
0.6925	1.54475	0.634558	0.707008	0.807291	-0.11786	1.53794	0.971849	1.28481	0.867724	0.660911	1.0312	0.71356	0.926121		0.6925	0.354586	1.1273	0.667988	0.565709	1.45045	1.1081	0.427817	0.932699	0.625417	1.32296	0.779373	1.6818	1.08749		0.6925	0.181447	1.05764	0.451127	0.46665	-0.540621	0.213079	0.245112	1.21558	0.441913	0.933206	1.46331	0.724288	0.136105
0.694167	0.348178	0.937676	0.636589	0.723373	-0.0493439	1.06011	1.4583	1.53352	-0.171464	0.830082	1.1516	0.906365	0.391211		0.694167	0.459509	1.0598	0.893959	0.822837	0.530316	0.879659	0.825432	1.12218	0.765404	0.162459	0.422091	1.14151	0.587782		0.694167	0.803554	0.580695	0.930916	0.3264	0.519664	0.597231	0.613571	0.936159	0.506419	0.691547	1.33599	0.762627	0.587162
0.695833	0.806929	0.61364	0.434499	1.43233	0.538312	1.09862	1.50112	1.25439	-0.124508	0.253432	1.12303	0.879865	0.724962		0.695833	0.5604	0.73437	1.60144	0.489156	0.525544	1.19676	0.522542	0.71504	0.756557	1.35007	0.632608	0.678931	1.16016		0.695833	0.473118	0.234342	1.74101	0.700903	-0.134521	0.924331	0.408331	1.01115	1.01762	0.862441	1.31507	0.779302	0.598539
0.6975	0.863104	0.316169	0.357671	1.2904	0.441412	1.70796	0.69495	1.43385	0.517611	0.639645	0.997465	1.04222	0.685592		0.6975	1.192	1.32722	0.749545	0.542362	0.463538	0.359879	0.733549	0.502677	0.536083	0.658584	0.824524	0.892347	0.732862		0.6975	0.802329	0.58683	1.10121	0.129269	0.820699	1.34652	0.434627	0.797122	0.476252	0.70485	0.804062	0.489925	1.03828
0.699167	1.03653	0.384139	0.362246	0.812889	0.337847	2.43799	0.386245	1.52351	0.14813	0.639973	1.29278	0.675161	0.674529		0.699167	0.548944	1.15101	1.14604	-0.0192191	0.983241	1.35139	0.617376	1.08539	0.934424	0.657724	0.729223	0.967027	0.618365		0.699167	0.893733	0.529556	0.781215	0.690214	-0.057251	0.617613	0.144511	0.995245	0.513939	0.797794	0.932624	0	0.863425
0.700833	0.3814	0.848686	0.678742	1.23708	0.209799	1.18692	0.603046	1.14349	0.00800109	0.501603	1.28135	0.904678	0.411737		0.700833	0.876175	1.45842	0.542937	0.887575	0.71486	0.892497	0.595529	0.520979	0.912182	0.567263	0.845403	1.24902	0.784168		0.700833	0.382677	1.42628	0.901806	0.477919	0.504401	0.595213	1.63662	0.737068	0.492828	0.402091	1.06073	-0.0219173	0.58422
0.7025	0.897902	0.620527	0.414865	0.875806	0.951391	1.72537	0.581962	1.44183	-0.0462565	0.345767	1.3275	0.870133	0.762477		0.7025	0.415746	0.733741	0.952134	0.43332	1.11299	0.330301	0.833013	0.964891	0.72453	0.734735	0.848015	1.03307	1.02953		0.7025	0.616672	0.651848	1.19577	0.787803	-0.179882	0.61377	0.340454	1.03473	0.604396	0.760456	1.09433	0.342056	1.10345
0.704167	0.492445	0.207745	0.160626	1.25672	0.180858	1.3091	0.334316	1.11283	-0.288197	0.479087	0.649232	0.56534	0.702047		0.704167	0.634088	0.674059	0.579785	0.365922	0.860308	0.521613	0.54857	0.518653	-0.0217391	0.973199	0.819319	0.849264	1.34834		0.704167	0.547274	0.974891	0.288189	0.192179	0.185284	0.450219	0.721866	0.580383	0.453158	0.442586	1.55729	0.411665	0.861463
0.705833	0.800858	0.726294	1.30016	0.611647	0.848912	1.13132	0.40541	1.60712	0.493302	0.373049	1.41234	1.27573	0.928623		0.705833	0.369951	0.194998	0.909682	0.503697	0.749689	1.2832	1.16703	0.96598	0.737121	-0.0521939	0.586867	0.521976	0.310733		0.705833	0.650195	0.608921	1.28198	0.592559	0.976207	1.15772	0.619327	0.0213179	0.260922	0.261912	1.5281	-0.065445	0.749271
0.7075	1.14965	0.628391	1.00756	0.83426	-0.35382	1.77863	0.153426	1.66774	-0.452099	0.696094	1.22906	1.19421	0.441705		0.7075	1.40315	1.13927	0.690085	0.344798	0.525532	1.68073	0.739411	0.715154	0.566168	0.0202309	0.7704	1.43718	0.907728		0.7075	0.246217	0.723034	0.554316	0.26361	0.437984	0.306265	-0.139306	0.466584	0.888847	0.873534	1.4097	0.0661755	0.51718
0.709167	1.66428	0.588331	0.592252	1.27076	0.217093	1.53461	0.291781	1.73043	0.687216	0.481534	1.0709	1.26874	0.688202		0.709167	1.11927	1.2179	0.615182	0.139613	0.417564	0.923918	0.441399	1.03068	0.75345	0.710039	0.801975	0.7989	0.664551		0.709167	0.657289	0.719111	1.04784	0.972037	0.745992	0.756112	-0.11282	0.721452	0.682692	0.77984	1.1865	0.974279	0.502444
0.710833	1.47293	0.838856	0.51979	0.518235	0.748655	0.954684	0.706693	1.63687	0.514311	0.316202	0.915332	1.0303	0.942626		0.710833	0.672568	0.58996	0.6002	0.155039	0.946603	0.425794	0.574737	0.992161	0.397257	0.635393	0.871213	0.777648	1.05352		0.710833	0.897509	0.462263	1.21753	0.330329	0.486843	1.2571	0.991083	0.925905	0.0742612	0.650283	0.893713	0.799775	0.363707
0.7125	1.55431	0.552639	0.220682	1.07116	0.495837	1.33976	0.13469	1.27631	-0.261796	0.596011	1.59851	0.825013	0.659841		0.7125	0.878194	1.78949	0.220829	0.108215	1.13147	1.33292	0.32249	0.529678	0.785996	0.567364	0.885051	1.30181	1.66214		0.7125	0.713171	0.592693	2.18416	0.607009	-0.43898	0.765762	0.655483	0.876523	1.02161	0.785289	0.624289	0.411113	1.16915
0.714167	0.737583	0.310379	1.41817	0.886774	0.44944	0.985589	-0.028645	1.4417	0.513957	0.527938	0.858825	0.55358	1.01274		0.714167	0.978996	1.88763	0.26581	0.662476	0.60803	0.736334	0.532187	0.886995	1.65279	0.659534	0.597895	1.81906	0.879323		0.714167	0.372203	0.38659	1.32248	0.447825	0.944881	0.519017	1.50244	0.295079	1.15145	0.550285	1.54611	0.525061	0.136488
0.715833	1.48276	0.491079	0.587302	1.43152	0.848411	1.12902	0.916211	0.89806	-0.186483	0.848104	1.14658	0.849181	0.569726		0.715833	0.475758	1.02091	0.940343	0.251282	0.948194	0.242374	0.447924	0.865467	1.02566	0.674059	0.808459	0.584719	1.0025		0.715833	0.72397	0.495103	0.618752	0.805486	-0.140244	0.649505	0.167997	0.973861	0.478539	0.625684	1.17402	0.129235	0.564576
0.7175	1.40277	0.461622	0.10156	0.748814	0.20958	1.27129	0.582896	1.23596	0.256913	0.416411	1.17446	0.968784	0.0858959		0.7175	1.34008	1.29008	0.683046	0.742197	1.82772	1.00483	0.980632	1.17558	1.16387	0.536874	1.27073	0.980652	0.837111		0.7175	0.689747	0.388534	0.620781	0.239912	0.278252	0.746859	1.12057	1.8202	1.74713	0.918438	1.19674	0.529066	0.817521
0.719167	1.11245	0.716967	0.492824	0.60727	0.0528941	0.972602	-0.141751	1.09	0.389321	0.192583	0.957191	0.559008	0.71708		0.719167	0.71319	1.2568	0.54471	0.293741	1.23979	1.19284	0.622794	0.972387	0.604973	0.346816	0.925147	1.58479	0.679488		0.719167	0.956834	0.619711	1.16308	0.829786	0.132422	0.848379	0.611159	0.911617	0.612974	0.805928	0.972994	0.328955	0.571887
0.720833	0.919987	0.76001	0.764129	0.596125	-0.220805	1.01721	0.777419	1.47626	0.898894	0.351385	1.71226	0.520992	0.827288		0.720833	0.747368	1.46138	0.259045	0.87714	1.04705	0.758298	0.270715	0.586474	1.04071	0.148008	0.911249	0.501184	0.655107		0.720833	0.635569	0.474271	0.679892	0.131554	0.52547	0.582537	0.378805	0.743243	0.439965	0.67528	1.28594	0.643772	0.534989
0.7225	0.935347	0.604961	1.03718	0.820681	1.05948	1.29856	0.347599	1.24517	0.476772	0.23002	1.30795	0.726456	0.859089		0.7225	0.448863	0.920014	0.750618	0.589061	0.887676	0.801382	0.634491	1.06038	0.381906	0.858577	0.459472	0.785238	0.91979		0.7225	0.963855	0.659322	1.22994	0.338603	-0.271229	0.577404	0.0515473	1.10938	0.692966	0.943778	0.265993	0.241525	0.505466
0.724167	0.397819	0.717522	0.168857	0.957997	0.623097	1.19065	0.431025	1.30006	-0.134638	0.73558	0.838686	0.845309	0.568936		0.724167	0.588864	0.161296	0.743462	0.570118	0.677596	0.704938	0.879434	0.625409	0.539946	0.535368	1.07488	1.04408	1.045		0.724167	1.70469	0.562332	1.13661	0.156322	0.0299746	0.722828	1.31088	0.43958	0.404525	0.986518	1.33986	0.417784	0.700973
0.725833	0.643528	0.861715	0.560773	0.709388	0.405741	1.93546	0.596106	1.65341	0.212096	0.710881	0.991875	1.13292	0.246934		0.725833	0.506396	0.935905	0.391653	-0.115957	0.0426876	0.757658	1.16159	1.12784	0.793253	0.582112	1.01784	0.698006	1.35163		0.725833	1.6903	0.925727	0.557351	0.8725	-0.3467	0.560899	0.607158	0.714332	0.737846	0.386724	1.08591	0.583935	0.73773
0.7275	1.23428	0.440889	0.486515	0.653709	0.492445	1.36049	0.847378	1.0166	-0.189748	0.632111	0.734738	0.520472	0.682739		0.7275	0.311755	0.789497	1.21243	-0.0214653	0.460981	0.71029	0.229717	0.3249	0.778014	1.12278	0.685856	0.672416	0.832775		0.7275	0.268601	0.683584	0.412037	0.653212	-0.0801443	0.879507	0.108033	0.448179	0.996805	0.644473	1.31415	-0.0433407	1.07663
0.729167	0.695767	0.502019	0.416995	0.830983	0.31167	1.71196	1.04077	1.57625	0.140653	0.621304	0.91037	1.07599	1.41473		0.729167	0.7262	0.886002	0.72043	0.673519	0.537219	0.85124	1.16498	0.788023	0.751095	0.773239	0.641565	0.596463	0.89873		0.729167	1.21526	0.752284	0.386332	0.307722	0.166667	0.909268	1.03421	0.763276	0.553829	0.397518	1.0744	0.76247	0.752336
0.730833	0.760563	0.540822	0.672241	1.01383	0.952573	1.12271	0.692627	1.03915	0.0304942	0.507453	0.609244	0.590538	0.720889		0.730833	0.587823	0.98106	0.694475	0.291619	0.791038	1.58244	0.913868	1.505	0.750094	0.712667	0.883031	1.52325	0.973105		0.730833	0.403497	0.593623	0.449305	0.391202	0.401675	1.42245	0.969356	0.515118	0.412429	0.30724	1.09534	0.513576	0.152334
0.7325	0.998479	0.730232	0.303001	1.00188	0.453498	1.00258	0.4126	1.65065	-0.200505	0.246214	0.823452	0.916063	0.661989		0.7325	1.26981	0.819759	0.598163	0.332572	0.819654	0.97985	0.67549	0.956259	1.00674	0.569304	0.829686	0.951731	0.91086		0.7325	0.674218	0.531938	0.558582	0.0742316	0.281911	0.345446	0.631146	0.417527	0.751313	0.844672	1.31222	0.311339	0.961943
0.734167	1.44638	0.227786	0.833438	0.96123	-0.342618	1.54276	1.53625	1.20714	-0.382602	0.633157	1.2825	0.825432	0.93013		0.734167	0.585138	0.810784	0.49298	0.367649	0.132138	1.0633	0.853758	1.03425	0.438468	0.96535	0.724746	0.879123	0.80357		0.734167	0.574933	0.989013	1.2368	0.121219	-0.282701	1.02076	0.154808	0.291232	0.539496	1.06806	1.70813	0.424297	0.556005
0.735833	0.194117	0.351261	0.320364	0.70168	0.329359	0.881635	0.665467	1.50886	0.246883	0.431601	0.996285	0.4064	0.535774		0.735833	0.248285	0.390013	0.494475	0.0620221	0.800519	0.891886	0.842904	1.3821	0.683206	0.284815	0.691418	1.14331	0.554187		0.735833	0.475583	0.848788	1.46893	0.554538	0.280803	0.720019	0.692345	0.754851	0.56602	0.544873	1.26707	0.44016	1.1103
0.7375	0.988446	0.583321	0.415567	0.887734	0.864665	1.05341	0.898491	1.52217	0.103472	0.291175	1.18243	0.763893	0.575884		0.7375	0.474578	0.614005	0.341195	-0.0410473	0.727048	0.23406	0.96596	1.04945	0.924486	0.722761	0.977822	1.43681	1.33088		0.7375	0.348387	0.804642	2.07526	0.264719	0.380989	1.86563	0.63445	0.823852	1.3367	0.711902	1.0521	0.484411	0.538495
0.739167	1.30763	0.270687	0.633302	1.31059	0.962086	1.52533	0.954437	1.73057	0.895636	0.101906	1.03482	1.19554	0.557016		0.739167	0.55521	0.575143	0.328818	0.882442	0.699345	0.702462	1.00627	0.886627	0.524087	1.09303	1.19469	0.778486	1.24187		0.739167	0.591418	0.62324	0.987735	0.400832	0.419511	1.03233	0.258183	0.697502	0.23878	0.944026	0.815587	0.404144	0.505098
0.740833	0.951302	0.880485	0.883817	0.766414	0.577283	1.08866	0.473047	1.14509	0.917505	0.576677	1.12402	0.57884	1.01578		0.740833	0.626552	0.781037	0.814422	0.153887	0.877794	1.02451	0.466141	1.22279	0.923758	0.204134	0.316416	0.413587	1.02164		0.740833	0.571215	0.584344	1.10531	0.998023	0.280924	0.504075	0.51502	0.982408	0.943953	1.37753	1.33396	0	0.871439
0.7425	1.14417	0.52287	0.781253	0.927605	0.0212339	1.01289	1.12502	1.22002	-0.173963	0.204851	1.06265	0.589468	0.513015		0.7425	0.538056	1.04262	0.590525	0.103776	0.514745	0.476606	0.438633	0.63047	0.678311	0.655453	0.848914	1.95907	1.46461		0.7425	0.72494	0.77235	0.473328	0.337706	0.177852	0.35368	0.682581	0.421267	-0.00199598	0.547508	0.508377	0.37338	1.04397
0.744167	0.330529	0.807855	0.172766	1.24093	0.369675	0.975104	0.689292	1.88437	0.703997	0.696379	0.755385	0.610035	0.847552		0.744167	0.709849	1.00017	0.542641	1.29234	0.383485	0.529969	0.568888	0.745907	1.07278	1.13956	0.792291	1.68373	0.832479		0.744167	0.724424	0.8604	0.68097	0.455978	-0.134768	0.846097	0.219194	0.771639	0.0581543	1.04922	1.68219	0.550311	0.22176
0.745833	0.250208	0.957755	0.492072	0.834653	0.633502	2.05072	0.748072	1.31406	0.166737	0.555283	1.41738	1.05008	1.49487		0.745833	0.718762	0.737656	0.545185	-0.01926	0.426248	1.1368	0.670874	0.905084	0.849512	0.988289	0.947668	0.263175	1.4696		0.745833	0.876779	0.561652	0.596031	0.404798	0.815124	0.819622	0.513252	1.0573	0.268064	0.304964	1.63588	0.508209	0.77084
0.7475	0.463135	0.552633	0.496422	1.07258	0.404354	1.36269	0.762403	1.07695	-0.0129161	0.51594	1.26772	0.954157	0.555383		0.7475	0.597279	1.02909	0.278587	0.34314	0.478854	0.480401	0.400481	0.895985	1.31262	0.960996	0.83451	1.13414	0.836206		0.7475	0.591151	0.633326	1.09634	-0.109141	-0.260596	0.704466	0.205675	0.732903	0.387684	1.15383	1.27557	0.416978	1.01463
0.749167	1.0714	0.28579	0.452741	0.843809	0.890839	1.49419	0.757114	1.44421	0.250313	0.628128	0.910766	1.12179	0.577842		0.749167	0.577928	0.932824	0.727658	-0.115715	0.617705	0.580958	0.656961	0.73351	0.543013	0.523294	0.640834	1.52898	0.65111		0.749167	2.19934	0.664496	1.01366	0.97119	0.896514	0.648142	0.26672	0.38733	0.265968	0.851358	0.918816	0.199805	1.34294
0.750833	0.798715	0.912389	0.597648	0.959253	-0.188567	0.941344	0.67113	1.60596	0.0835122	0.369231	0.87663	0.955768	0.728847		0.750833	0.21742	0.64439	1.06905	0.160313	0.629696	0.875809	0.609141	1.26891	0.734168	1.32346	0.343635	0.539134	0.786505		0.750833	0.463034	0.221014	1.47192	0.033694	0.386411	0.541024	0.492408	1.08127	0.351815	0.706988	1.15571	0.428348	0.92546
0.7525	1.14051	0.477654	0.544269	0.865033	0.28985	1.12212	0.320709	1.48542	0.531003	1.24082	1.21554	0.156842	0.502348		0.7525	0.834248	0.673389	0.780454	0.502105	0.939348	1.20171	0.678757	1.08693	0.275962	0.697685	0.849545	1.97564	0.456271		0.7525	0.780894	0.657866	0.28929	0.763213	-0.133127	0.308318	0.390352	1.13972	0.740217	0.471624	0.996501	0.261558	0.549643
0.754167	0.867233	0.710151	0.782034	0.534931	0.479614	1.32231	0.263398	1.17796	-0.0789006	0.659897	0.99648	1.02685	0.865071		0.754167	0.55558	0.590782	0.484966	0.797637	0.17098	0.352808	0.923807	0.710751	0.813321	0.0780646	0.961477	0.980198	0.997755		0.754167	0.668003	0.909051	2.04255	0.575245	-0.656136	0.670508	0.60045	0.68472	0.369238	0.586576	0.649266	-0.0635149	0.467496
0.755833	0.300982	0.853188	0.767214	0.802856	0.673141	1.29596	0.69029	0.494254	0.728521	0.293194	0.852878	0.734084	0.828591		0.755833	0.33052	0.0949444	0.719942	0.0172501	0.918823	0.856369	0.635472	1.13336	0.872136	0.881209	0.595669	1.03696	0.867894		0.755833	0.274888	0.611995	0.491731	0.313693	0.769743	0.679983	0.876869	0.331792	0.454866	0.575215	1.50554	0.210735	1.00905
0.7575	1.01327	0.278033	0.309307	0.948215	0.647246	1.33402	0.875217	1.58384	0.0694066	0.373514	0.99309	1.37972	0.938556		0.7575	0.70701	1.268	0.546544	0.274129	0.375869	0.799508	0.457476	1.24767	0.731812	0.840911	1.23094	0.937545	1.18604		0.7575	0.653168	0.375417	0.453228	0.423458	0.855608	0.56291	0.387259	0.646874	0.227998	0.769891	0.727852	0.604477	0.679769
0.759167	0.366996	0.736563	1.42277	0.451312	0.39109	1.14155	0.788693	1.29126	0.806912	0.22989	1.34897	1.202	0.629948		0.759167	0.578446	0.933057	0.437809	0.58945	0.33719	0.588512	0.603777	0.988338	0.494018	1.21786	0.763181	0.796138	0.583115		0.759167	1.24139	0.906579	0.284675	0.403342	1.13303	0.408734	0.730028	0.661964	0.46531	0.587571	1.28808	0.260451	0.70097
0.760833	0.832751	0.487646	0.516867	1.45942	0.143662	1.51089	1.40506	1.34933	0.377669	0.439377	0.749465	1.04678	1.03154		0.760833	0.933119	0.768252	0.639195	0.0285641	0.356222	0.851423	0.757544	0.815813	0.778614	0.428448	0.484881	0.230143	0.820042		0.760833	0.440703	0.60973	0.272777	0.317267	0.350077	0.790037	0.477885	0.756648	0.023586	0.941805	0.532883	0.376123	1.39881
0.7625	0.914001	0.371893	0.847778	0.966018	0.363713	1.87411	0.926661	1.58234	-0.54671	0.286926	0.974618	0.61094	0.365277		0.7625	0.717421	2.12613	0.54707	0.716594	0.575202	0.773424	1.25114	0.759905	0.830065	1.44608	0.569092	1.31645	0.333841		0.7625	0.178975	0.752257	0.818104	1.01126	0.0806806	0.895091	0.558712	0.360466	0.798869	0.945414	0.734944	0.407131	0.394366
0.764167	1.20658	0.611299	0.704248	0.994014	0.18372	0.814638	0.482504	1.067	-0.128558	0.616535	0.799984	0.874984	0.661376		0.764167	0.539398	0.489562	1.32382	0.461172	0.991208	0.524295	0.629655	1.27886	1.56605	0.432031	0.972166	1.22145	1.04779		0.764167	0.536865	1.00915	0.383496	1.02726	0.701793	1.26853	0.412312	0.567408	0.806884	0.66919	0.760209	0.671408	0.641859
0.765833	1.29904	0.776512	0.414882	1.62898	1.37277	1.13266	0.569699	1.57076	-0.149519	0.624961	0.94506	0.711759	0.777303		0.765833	0.262043	2.4546	1.05937	0.35478	0.655394	0.943152	1.13233	0.854316	0.815223	0.669066	0.701695	1.5548	0.564865		0.765833	0.569938	0.259252	1.37744	0.765845	0.217266	0.726077	1.68525	0.333185	0.738148	0.772306	0.778816	0.0427917	1.13726
0.7675	1.07404	0.667341	0.390103	0.610274	0.598525	1.69901	0.570948	1.18866	0.313726	0.39185	1.33275	0.66618	0.765925		0.7675	0.814332	0.712256	1.15202	3.70618	0.237386	1.19162	0.770673	0.626695	0.445132	0.728827	1.0817	1.03782	0.785027		0.7675	1.03066	0.304838	1.23091	0.519276	0.0335743	0.329678	0.308265	0.790943	0.491457	0.731663	1.09409	0.534668	0.804899
0.769167	1.16057	0.444426	0.256173	0.901094	0.761974	0.818416	1.02012	1.40541	0.689294	0.713716	1.12379	0.345483	0.776169		0.769167	0.932633	1.34212	1.17877	0.753711	0.464743	0.68937	0.980351	0.610201	0.806518	1.09125	0.677306	1.15566	1.34289		0.769167	1.18082	0.864245	0.795128	0.677194	0.637714	0.92031	0.453398	0.62762	1.00773	0.639269	0.862106	0.281782	0.52532
0.770833	0.596571	1.01907	0.611372	0.642729	0.386595	0.940926	1.49916	1.5133	0.156872	0.516785	1.38866	0.748454	0.596184		0.770833	0.651822	0.672528	1.14538	-0.301844	0.795012	1.93461	0.620241	0.769912	0.777115	0.816492	0.708024	0.59731	1.03423		0.770833	0.559645	1.49084	1.33151	0.527276	-0.0231556	0.515421	1.05561	0.715676	0.124017	0.290107	1.00667	0.281148	0.973307
0.7725	0.715008	0.354588	-0.203479	0.802655	0.905188	1.38793	0.752019	1.24095	0.734749	0.648807	1.38513	0.868147	1.01391		0.7725	0.549511	1.12551	0.978786	0.0795639	0.685196	0.85463	0.390505	0.728417	0.52687	0.998809	0.757385	1.02865	0.695809		0.7725	0.975506	0.611047	0.700608	0.205374	-0.0584388	0.576566	0.65354	1.03634	0.691144	0.850711	0.703637	0.150031	1.09761
0.774167	1.35422	0.756909	0.525098	0.817908	0.743991	1.31222	0.463542	0.995975	-0.382868	0.209974	0.978673	0.650796	0.994767		0.774167	1.137	0.676606	1.5069	-0.0257746	0.797515	0.781154	0.560526	0.663678	0.640793	1.10775	1.11397	1.03721	0.539822		0.774167	0.701739	0.486801	0.678209	0.641898	1.16655	0.386108	0.770742	0.947479	0.126811	0.708466	0.975502	0.573297	0.311884
0.775833	0.584545	0.354307	0.16676	1.38116	-0.318678	1.82351	1.15804	1.73615	0.0145347	0.350609	1.24098	0.297784	0.752115		0.775833	0.366458	0.333534	0.787519	0.311087	1.10212	0.731294	0.874362	0.635056	0.858996	0.965869	0.399663	0.395833	0.31248		0.775833	0.569576	0.667126	0.613224	0.410556	0.265825	0.711833	0.537452	0.795439	0.685705	0.639386	1.49951	0.479522	0.440731
0.7775	1.09034	0.578895	-0.093186	0.893256	0.95846	0.969756	0.491755	1.44823	0.535875	0.584417	0.951869	0.73987	0.474875		0.7775	0.964238	0.670704	0.607626	0.293741	0.426385	0.410229	1.32734	1.00423	1.24593	0.678134	1.29983	1.95722	0.895045		0.7775	0.561306	0.785392	1.98183	0.23137	-0.27699	0.780706	0.610476	0.844613	1.02086	0.922717	1.76643	0.301185	0.915505
0.779167	0.81584	0.356978	0.631861	1.23839	0.563478	1.62588	1.02028	2.19285	0.408623	0.103898	0.969201	0.909091	1.05899		0.779167	0.318269	0.627216	0.726698	0.470024	0.652206	0.490961	0.934202	1.03878	0.493647	0.19078	0.690709	1.31595	0.516924		0.779167	0.706758	0.793327	0.720615	0.250917	-0.107805	0.694232	-0.0360723	0.902448	0.566927	0.486048	1.1268	0.211457	1.18716
0.780833	0.292263	0.565149	0.580463	1.14419	-0.0689505	1.47855	0.699579	1.28811	-0.0586887	0.248999	1.18817	0.840626	0.979134		0.780833	0.463392	0.680029	1.12511	0.916072	0.72473	0.998809	0.961418	2.00492	0.953392	0.710571	0.905073	1.15267	1.00367		0.780833	0.819672	0.81367	1.54475	0.208241	0.241814	0.717981	0.649281	1.48271	1.11035	0.798226	1.51905	0.129836	0.726453
0.7825	0.970733	0.53179	0.309997	1.11014	0.246192	0.909899	1.32657	0.658721	0.333389	0.674025	0.862214	0.852261	0.494698		0.7825	0.314327	1.17479	0.939808	0.0433522	0.667459	1.20269	0.756287	0.48158	0.881057	1.06572	0.654837	0.791888	0.881816		0.7825	0.84793	0.393245	0.141135	0.751535	0.352628	0.616916	-0.1486	0.795791	0.43872	0.510895	1.1774	0.258042	1.76948
0.784167	0.629009	0.634193	-0.00714016	1.04313	0.265264	1.36652	0.788801	1.44949	0.336898	0.83653	0.881925	0.760488	0.562418		0.784167	1.27852	1.26733	0.488151	-0.0572757	1.18256	1.17875	0.704586	0.89519	0.762502	1.32573	0.495946	0.678416	0.71414		0.784167	0.486989	0.688981	1.07765	0.207116	0.0344148	0.555784	0.58033	0.813424	1.76164	0.93512	1.11475	0.468953	1.13071
0.785833	1.27082	0.585664	0.160417	0.771093	0.815261	1.3052	1.12997	1.60299	0.158509	0.937933	1.579	0.967638	1.05069		0.785833	0.955421	0.898869	0.858498	0.803427	0.920104	0.669628	0.625985	0.544284	0.468624	0.509922	0.567561	0.888711	0.82561		0.785833	0.596079	0.628112	0.745924	0.6612	0.531394	0.456517	0.195704	0.0671261	0.515348	1.11959	0.728782	0.252679	0.98252
0.7875	0.538901	0.501159	0.704533	0.804318	0.50589	1.12094	1.44267	1.04917	0.194443	0.597495	0.604885	0.421875	0.542899		0.7875	0.734245	0.491847	0.528413	0.254518	0.924719	0.0562943	0.624273	0.546658	1.30918	0.490442	0.379835	1.20361	0.560538		0.7875	0.386285	0.433513	1.36447	1.07303	0.292075	0.666806	0.263956	1.12598	0.457187	0.717071	1.1132	0.473566	0.340306
0.789167	0.577453	0.591528	0.428006	0.830017	1.13365	1.24036	0.982951	1.48107	0.329235	0.290529	1.56644	0.71947	0.827393		0.789167	0.320513	1.57791	1.09273	0.0328836	0.526815	0.893421	0.36359	1.08681	0.850433	0.706703	0.937167	1.81994	0.864429		0.789167	1.10326	0.85497	1.12282	0.563552	0.408654	1.0362	0.0437977	0.401329	0.164094	0.479189	1.06678	0.320335	0.648497
0.790833	1.33195	1.05619	0.657651	0.707441	-0.174421	2.1214	1.62597	1.80517	-0.0265272	0.290849	1.04543	0.880622	0.647892		0.790833	0.40958	1.56562	0.643529	0.290239	0.398289	0.958614	0.721577	0.730328	1.07919	0.916376	0.281733	0.906104	0.793247		0.790833	0.877766	0.620059	0.924338	0.418676	-0.307944	0.446305	0.586043	0.133094	0.50231	0.580863	1.43447	0.290909	0.61482
0.7925	0.842489	0.909918	0.462148	0.887388	0.293647	2.29381	1.64944	1.89781	-0.122342	0.71318	1.45144	0.59322	0.940211		0.7925	0.60483	0.860819	0.806487	0.509336	0.831503	0.778094	0.745045	0.753816	1.09276	0.639238	0.998237	1.08751	1.30682		0.7925	1.10882	0.713808	0.564707	0.701729	-0.130881	0.78925	0.59089	1.00712	0.393805	0.895725	1.06682	0.481643	0.864337
0.794167	0.658163	0.368377	0.00239706	0.896708	0.218177	1.60444	0.7269	1.71739	0.277835	0.348961	1.07486	0.849383	0.619539		0.794167	0.80267	0.845212	1.30941	0.799627	1.02417	0.998352	0.705113	0.542338	0.756495	1.06755	0.59356	1.11711	0.287965		0.794167	0.648438	0.73004	0.73438	0.511667	0.838634	0.692724	0.773921	1.13319	0.38495	0.36449	1.22087	0.534645	0.947757
0.795833	0.298176	0.404479	0.584236	0.926066	0.269352	1.11664	0.947759	1.87997	0.860256	0.22763	1.2767	0.483183	0.614143		0.795833	0.936942	1.4628	0.485273	0.203008	1.20001	1.46981	0.667945	0.665383	0.575374	0.946619	0.876593	0.873595	0.742222		0.795833	0.481611	0.885498	0.615921	0.204641	0.105899	0.509196	0.323736	0.955343	-0.0107063	0.834028	1.06966	0.369686	1.8751
0.7975	1.36585	0.393049	0.300307	1.34725	1.17115	1.68773	1.14224	1.40798	0.414572	0.444661	1.11365	1.07009	0.624515		0.7975	1.30156	1.13502	0.775244	0.706413	0.524956	1.95989	0.700132	-0.213751	0.661785	1.26911	0.952905	1.18206	0.467356		0.7975	1.36775	0.564219	1.14402	0.483963	-0.138171	0.692361	0.957284	1.19872	0.501632	0.848274	1.10915	0.427716	1.58545
0.799167	0.737825	0.55881	0.234835	1.14032	0.949571	2.04537	1.0772	1.71378	0.236807	0.454799	0.916124	0.895446	0.739613		0.799167	0.743917	0.798061	1.02723	0.402942	0.703265	1.33256	0.996016	0.841384	0.922094	1.11149	0.644812	1.36651	0.626423		0.799167	0.418161	0.505712	1.09918	0.150871	-0.312884	0.810963	0.270516	0.282345	0.819407	0.199729	1.27942	0.15429	0.920372
0.800833	0.432423	0.781135	0.723841	0.878528	0.456535	1.90714	1.39759	1.30039	0.463742	0.310604	0.473417	0.919452	0.952845		0.800833	0.841824	1.03166	0.933464	0.139613	0.869805	0.827271	0.577796	0.163116	0.524186	0.552048	1.11807	1.07586	0.974457		0.800833	0.65083	0.755237	1.23271	0.137297	-0.28459	2.00414	-0.0447315	0.560623	0.752848	0.708764	1.47844	0.313139	1.06385
0.8025	1.20306	0.846146	0.301306	1.03173	0.110811	1.46927	1.15692	1.69578	-0.197993	0.74308	1.28237	0.800404	0.878532		0.8025	0.318296	0.79107	0.783409	1.22848	1.01973	0.778668	0.796555	0.309729	0.775389	0.444012	0.794196	1.13359	0.581383		0.8025	0.990426	0.897585	0.797724	0.523423	1.05085	0.628304	1.06001	0.669031	0.608136	0.632282	0.874202	0.433116	1.18322
0.804167	0.805054	0.392879	0.670065	1.03109	0.376608	0.763504	1.13193	1.03469	0.219336	0.18832	1.05948	0.77401	0.824699		0.804167	0.463505	0.314527	0.476665	0.772675	0.646231	1.02787	0.688849	0.8196	0.5939	0.467235	0.21245	0.869041	0.676022		0.804167	0.390506	0.864668	0.538495	0.307959	0.202749	0.636767	0.709943	0.288805	0.468396	1.01794	1.01375	0.63086	1.59209
0.805833	1.34762	0.93522	-0.0413944	0.51684	0.44524	1.52656	0.495917	1.38442	0.262292	0.681283	0.801348	0.478022	1.28131		0.805833	0.564101	0.507906	0.764396	0.126785	1.01708	0.879177	0.699153	0.0333692	0.71947	0.675641	1.21798	0.707816	0.718774		0.805833	0.829243	0.920914	0.419522	1.13242	-0.214711	0.252679	1.09088	0.441608	0.640477	0.743026	0.779007	0.49217	1.45103
0.8075	1.01211	0.166455	0.401466	0.778008	0.655798	1.53807	0.839196	1.43327	0.548859	0.503609	0.8983	0.612913	1.14334		0.8075	0.235697	1.59132	0.325006	0.248171	0.33605	1.04133	0.590817	1.09331	0.787368	0.731127	1.03823	0.723649	0.516092		0.8075	0.519683	0.318305	0.85958	0.496584	0.501349	0.676104	0.373423	0.899382	1.13721	0.655916	1.74805	0.469283	0.771173
0.809167	1.2493	0.68265	0.534886	0.942685	0.914221	1.84835	0.562275	1.22137	0.452282	0.623934	0.998274	0.764477	0.560441		0.809167	1.18888	0.982858	1.08798	0.160381	0.73182	0.535803	0.671987	1.39742	1.13062	0.777238	1.08741	0.649961	0.525111		0.809167	0.391432	0.264819	1.1625	1.08408	-0.1828	0.519783	0.525504	0.854643	0.680748	0.957023	1.21496	0.302415	0.708609
0.810833	1.00973	0.67837	0.78345	0.936135	0.755085	1.25055	1.85386	1.66155	0.511778	0.480438	0.759785	0.645758	0.389653		0.810833	0.539565	0.469107	1.23787	0.427719	0.790277	1.25016	0.481464	0.738828	0.329679	0.448067	0.90094	0.174351	0.911898		0.810833	0.508681	0.974342	0.566346	0.328242	0.35681	0.970874	0.664639	0.871673	0.59194	0.587903	0.977126	0.217235	1.20496
0.8125	0.914894	0.632601	0.119966	0.85408	0.129871	1.05543	0.628933	1.36341	0.780317	0.349456	1.24622	0.632284	0.840952		0.8125	0.822698	0.429322	0.525972	0.0976003	0.595973	1.47802	1.03193	0.633418	1.41646	0.73449	0.51176	0.336156	0.813042		0.8125	0.740741	1.15877	1.10259	1.08989	-0.415032	0.90451	0.820274	0.453172	0.961357	0.355303	1.24729	0.194217	0.571734
0.814167	0.791741	0.434702	0.387237	0.867679	-0.00736856	1.5422	1.42851	2.02636	0.215831	0.82126	0.882468	0.38373	0.754667		0.814167	0.645633	0.471529	0.622104	0.268713	0.993112	0.908397	0.632679	0.740985	0.743763	1.02242	0.666609	0.611404	0.364882		0.814167	0.701913	0.557787	0.924557	0.628423	0.578646	0.229712	1.09879	0.448316	0.393071	0.459369	1.46055	0.543313	1.31993
0.815833	1.10285	0.936973	0.0961307	1.21326	-0.0228029	1.56614	0.829146	1.13824	0.0835565	0.50596	1.36516	0.541032	0.804313		0.815833	0.46632	1.44051	1.05948	0.69069	0.441891	1.11832	0.720357	0.226164	0.774042	0.728363	0.785676	1.55388	0.384506		0.815833	0.185267	0.898551	0.385041	0.217324	0.00945044	0.467667	0.339949	0.4137	0.350598	1.19607	1.41031	0.218594	0.809955
0.8175	1.03989	0.206347	0.228025	1.09614	0.328231	1.72557	0.54635	1.34488	-0.193965	1.10093	1.97268	0.439203	0.579852		0.8175	0.470075	0.617606	1.11458	0.350154	0.592831	1.00918	1.01366	0.78921	0.732822	0.684054	0.70355	0.615337	0.541245		0.8175	0.602665	0.33392	0.204186	1.06553	0.786501	0.402397	0.411715	0.789751	0.461606	0.907652	1.15358	0.416895	0.897366
0.819167	1.20659	0.521561	0.421932	1.26933	0.112036	1.50382	0.974618	1.6857	0.152761	0.0623584	1.19077	0.873057	0.539002		0.819167	0.397097	0.0844603	0.813408	0.571659	0.909052	0.792392	0.490908	1.74541	0.643238	0.43415	0.893826	0.978796	0.644558		0.819167	0.221317	0.68534	0.376696	0.0922174	0.82148	1.05099	0.506186	0.909071	0.386253	0.72158	1.04944	0.366316	0.969389
0.820833	1.20591	0.791478	0.900301	0.453368	0.0221969	0.973226	1.02723	1.24486	0.134131	0.427272	0.956064	0.986525	1.08294		0.820833	0.712676	0.773419	1.06959	0.454328	0.851714	0.352678	0.412335	1.1843	0.148667	1.10331	0.507883	1.11962	0.351		0.820833	0.459485	0.612884	0.480514	0.994568	-0.306973	1.05466	1.0763	0.832038	0.836448	0.547608	0.813205	0.241043	1.18794
0.8225	1.30468	0.79241	0.724324	1.01928	0.980518	1.0924	0.955094	1.20492	0.19435	0.520075	1.00828	0.633398	0.584188		0.8225	1.20168	0.54432	1.08195	-0.0654011	0.672255	0.279154	0.402159	0.578229	1.13671	0.153582	0.952381	1.52623	1.08045		0.8225	0.388749	0.449903	0.624487	0.271671	0.970539	0.798202	0.814176	0.511924	0.693695	1.02604	0.98322	0.674779	1.1887
0.824167	0.703224	0.413984	0.388678	0.635018	0.0807444	1.34225	0.857533	1.78283	2.03877	0.675063	1.16595	0.693481	1.0093		0.824167	0.676338	0.656947	0.54316	0.340454	0.85789	1.06742	0.336885	1.24032	0.171097	1.17124	0.84865	1.21635	1.32352		0.824167	0.665383	0.603029	0.771205	0.237624	0.61536	0.711193	0.478348	0.562966	0.827318	0.802908	1.52349	0.436262	0.648912
0.825833	1.30282	0.176624	0.168353	0.84814	-0.0206789	1.52656	0.698541	1.27736	0.761486	0.646305	1.51267	0.911739	0.36465		0.825833	0.804002	1.073	0.5387	0.475431	0.392276	1.04388	0.0628654	0.798035	0.461003	0.619451	0.773296	0.244142	0.637416		0.825833	0.485325	0.56848	1.2735	0.299236	0.382957	0.418498	0.627917	1.27327	0.629712	0.409733	1.15133	0.314888	0.676577
0.8275	1.01865	0.675162	0.690429	1.05087	0.618003	1.38019	0.610205	0.893544	-0.146064	0.185525	1.27148	0.423163	0.879564		0.8275	0.0879546	1.1601	0.510057	0.355214	0.525663	0.625206	0.721654	1.37438	1.01121	0.768134	0.506116	0.959264	1.47333		0.8275	0.627834	0.67881	0.629712	0.932741	1.21809	0.426339	0.365489	1.24855	0.907628	0.369361	2.06934	0.739661	1.37636
0.829167	0.89345	0.836208	0.850861	1.11404	0.377401	0.80824	1.57374	1.24533	0.154401	0.524615	1.10502	1.05035	1.21994		0.829167	0.652344	1.73521	0.606166	0.452071	0.580932	0.973148	0.996523	0.296934	0.646719	0.721286	0.480318	1.45285	0.984974		0.829167	0.603689	0.479572	0.573886	0.729996	-0.588443	1.18468	0.65681	0.778175	0.269643	0.7029	1.17618	0.348857	1.44349
0.830833	0.663678	0.6859	0.74144	1.15473	0.533597	1.85999	0.0350038	2.15177	0.415733	0.357053	1.26409	0.570977	1.0684		0.830833	0.598956	1.26149	0.258989	0.447303	0.726061	0.969724	0.295958	0.442411	1.04282	0.647917	0.687715	1.02329	1.03768		0.830833	0.991648	0.888619	0.563756	0.673091	-0.41494	0.590861	0.605806	0.736584	0.908964	0.855914	1.2626	0.323813	0.406866
0.8325	0.871464	0.79137	0.582626	0.881464	-0.0887666	1.27135	0.629975	1.44835	0.208496	0.49133	0.877541	0.697381	1.40861		0.8325	0.533857	1.02334	0.446172	0.307081	0.505306	0.252483	0.660854	1.97307	0.718467	0.365308	0.68967	1.49678	0.700093		0.8325	0.885975	0.520269	0.862924	0.432849	0.0115478	1.04647	0.486973	0.743559	0.622402	0.772968	0.951643	0.455937	0.701556
0.834167	1.21447	0.501044	0.518501	1.02894	1.11673	0.737323	0.76356	1.88409	0.22424	0.470271	1.16832	0.82531	1.07224		0.834167	1.04503	0.597203	0.631459	0.27372	1.58164	0.652419	1.22866	1.28272	1.17866	1.17635	0.750815	0.587367	0.743402		0.834167	1.2287	0.777907	0.97055	0.537343	0.211519	0.740821	0.246494	0.215045	0.526297	0.355911	0.893811	0	0.712989
0.835833	0.94398	0.686342	0.501244	0.580985	-0.015156	1.3624	0.900619	1.15428	-0.0076955	0.389432	1.07927	1.03434	0.74847		0.835833	0.587385	0.960123	1.17848	0.767763	0.542041	1.53552	0.779965	0.678521	0.878459	0.707381	0.871136	0.658444	0.868486		0.835833	0.751486	1.16414	0.894504	1.31262	0.397533	0.421496	1.06821	1.04871	0.673942	0.28814	1.121	0.398022	1.80566
0.8375	0.526718	0.866015	0.286394	0.981887	0.430293	1.19964	0.960662	1.0269	0.872659	0.438395	1.35499	0.712917	0.800329		0.8375	0.555778	1.44782	0.815763	0.2193	0.874049	0.649449	0.713082	0.477011	0.376742	0.396465	0.816116	1.12544	1.08227		0.8375	0.499319	1.11471	0.850935	0.697145	-0.0261286	0.539509	0.490948	0.676383	0.0927323	0.654303	0.843462	0.0654636	0.513956
0.839167	1.05139	0.894645	1.04054	0.858855	0.513021	1.6557	1.79472	1.04899	0.288106	0.348461	1.34502	0.542288	0.500163		0.839167	1.01378	0.775448	0.869036	0.572427	0.478386	0.175662	0.608272	0.641138	0.683702	0.254591	0.856701	0.596069	0.43375		0.839167	0.725015	0.756514	0.955442	1.28183	0.585035	0.610927	0.645663	0.790886	0.539532	0.520645	0.767123	0.457277	0.907628
0.840833	0.707924	1.18755	-0.0566452	0.815538	-0.31499	1.15232	0.629807	1.13231	0.382641	0.0416493	1.01909	0.899758	0.665779		0.840833	0.722227	0.929397	0.485027	0.634984	0.509976	0.373028	1.21088	0.0590702	1.03169	0.210681	0.799844	1.26716	0.552961		0.840833	0.501505	0.952546	1.05503	0.0341929	0.378636	0.826392	0.743185	1.28916	-0.409281	0.560941	1.20075	0.473903	0.850218
0.8425	0.654866	0.554241	0.0170959	0.522838	0.0260381	1.41892	0.408451	0.929023	0.616011	0.427186	0.718111	0.953564	0.905465		0.8425	0.594321	0.397279	0.518863	0.0777521	0.495636	0.637763	0.463382	0.278663	0.600794	0.850832	0.417885	1.1618	0.586214		0.8425	0.448039	0.633464	1.24102	0.478915	0.0780371	0.750078	1.11992	0.802532	0.18647	0.822149	1.0364	0.413471	0.819796
0.844167	0.722906	0.776626	0.441552	1.01482	0.0461261	1.43194	1.01642	1.55036	0.441332	0.327768	0.764384	0.810231	0.468494		0.844167	0.6517	0.338261	0.745966	0.021269	0.556929	0.432444	0.785043	0.679948	1.03985	0.84154	0.480789	0.963807	0.583309		0.844167	0.719759	0.763742	0.783175	-0.132771	0.994345	1.69696	0.359047	0.543183	0.539938	0.672087	1.18059	0.251514	0.712292
0.845833	1.17455	0.618327	0.804348	0.879286	0.159892	1.26389	1.06594	1.60815	0.543655	1.00412	1.21374	0.757937	0.801318		0.845833	0.281136	1.07451	0.924059	-0.184321	0.988381	0.437213	0.389464	0.412308	0.647344	0.126524	0.859773	0.141908	0.79611		0.845833	0.631712	1.14035	0.908811	0.0847119	-0.110689	1.15592	1.06773	1.0911	0.421496	0.412505	1.13537	0.278236	0.401315
0.8475	1.26333	0.231652	0.268499	1.45349	-0.00206494	1.01306	1.00144	1.91038	0.579267	0.447245	1.11817	1.08561	0.849371		0.8475	0.574827	0.758512	0.64778	-0.0763811	0.447208	0.569285	0.933945	0.869709	1.21423	1.14535	0.819552	0.961156	0.902906		0.8475	1.0245	0.54076	0.435387	0.155994	0.778001	1.03779	0.157205	1.25579	1.30612	0.413178	1.26389	0.34828	-0.161812
0.849167	0.830397	0.978833	0.637506	1.0016	-0.152348	1.09895	0.926782	1.13836	0.283857	0.313401	1.41029	1.13922	0.523526		0.849167	0.616401	0.87195	0.835046	-0.199858	0.344056	0.763476	0.387964	1.406	0.895924	1.47829	0.761905	1.52824	0.880153		0.849167	0.932184	0.289236	0.585509	0.342311	-0.000717163	0.975652	0.647923	0.969974	0.667894	0.748025	1.06014	0	1.0945
0.850833	0.798674	0.919343	0.518372	1.21815	0.666157	1.44356	0.914289	1.79274	-0.15333	0.779505	0.73366	0.668075	0.575922		0.850833	1.01824	0.62581	1.54467	0.614099	0.0436119	0.864239	0.737277	0.893262	0.527404	0.0732733	0.689958	0.558551	0.846131		0.850833	0.592147	0.737826	0.863872	0.299327	-0.246564	0.842566	0.940868	0.748295	0.218796	0.748025	1.19253	0.501439	1.45155
0.8525	1.27375	0.332426	0.140861	1.01337	0.535743	1.18891	0.0528489	0.636616	0.532289	0.379971	1.26378	0.601853	0.531291		0.8525	0.317122	0.887683	1.29797	0.0584922	0.508636	0.348305	0.918823	1.09971	1.25739	0.50955	1.16718	0.662338	0.66262		0.8525	0.593511	0.540284	0.30625	0.637322	0.69624	2.02038	0.705393	0.41255	0.386482	0.577303	1.12268	0.452021	0.543076
0.854167	0.942963	0.986639	0.634312	0.471981	0.316701	1.8439	0.586705	0.816943	0.425778	0.221908	0.852586	0.996479	0.734532		0.854167	1.53745	0.256045	0.816274	0.581945	0.604986	0.406409	0.539829	0.969178	0.91179	0.419752	0.254135	0.900029	0.631114		0.854167	0.840493	0.483506	1.15177	1.45098	0.444322	0.717436	0.530103	1.07675	0.167504	0.568667	1.7074	0.775127	1.07469
0.855833	0.471794	0.353049	0.29474	1.49524	-0.0134337	1.50289	0.873456	1.99064	0.254941	0.204922	0.947648	0.720351	0.629463		0.855833	1.10268	0.513841	0.76184	0.692301	0.9802	1.00357	0.680637	0.55485	0.47545	0.918005	1.09692	0.665191	1.34986		0.855833	0.42137	0.328933	0.871762	0.283184	0.18538	0.899636	0.710921	0.594465	0.563872	0.496449	1.12395	0.732187	0.866232
0.8575	1.25695	0.243982	0.162999	1.13751	0.530588	1.5391	0.245303	1.40172	0.0257884	0.231151	1.05511	0.899483	0.82485		0.8575	0.468332	1.04147	0.745617	-0.235912	0.895465	0.598224	0.990579	1.00371	0.567179	-0.0768825	0.982298	0.0861769	0.958875		0.8575	0.618047	0.355682	1.19472	0.805395	0.611358	0.730105	0.400062	0.912312	0.685012	1.40453	1.01219	0.343311	0.654821
0.859167	0.532281	0.484098	0.274353	0.71582	0.887973	0.842079	1.32501	0.992586	0.178303	0.353776	1.12655	0.763197	0.557986		0.859167	0.243935	0.583192	0.955313	0.461454	0.0221371	0.710001	0.461438	0.408842	0.586781	1.16264	0.890113	0.478348	0.415056		0.859167	0.366141	0.64029	0.651764	0.386001	0.204173	0.610128	0.328455	0.447637	0.340243	0.803039	1.15509	0.493414	1.08553
0.860833	0.675252	0.746651	0.288829	1.34595	0.109283	1.48071	0.776598	1.04169	0.0223242	0.625978	1.12641	0.835422	0.371333		0.860833	0.771028	1.3542	0.903226	0.366937	0.68306	1.20098	0.43358	0.82181	0.697763	0.435001	1.31631	2.27672	1.11952		0.860833	0.517063	0.76563	0.748214	0.767788	0.119703	0.372799	1.0642	0.521812	0.386105	0.761239	1.06667	0.168801	0.785714
0.8625	1.08094	0.90454	0.569722	1.05009	-0.108065	1.3227	0.510824	1.20529	0.057214	0.469954	0.830128	0.647625	0.489422		0.8625	0.633838	0.449152	0.841805	-0.0800762	0.391943	0.492925	1.04544	1.43965	0.518823	1.35399	0.898679	0.865869	0.855753		0.8625	0.495819	0.53927	0.843458	0.632372	0.497766	0.576343	0.45336	1.25033	0.286725	0.816178	1.18648	0.346275	0.521234
0.864167	0.534919	0.573175	0.574733	0.89	0.271218	0.904311	0.542988	1.30149	0.368219	0.796976	1.16944	1.03237	0.88003		0.864167	0.754817	0.841897	0.334679	0.400862	1.15661	0.446566	0.492949	0.306182	0.825679	-0.0045014	0.941541	0.956866	0.654837		0.864167	0.494138	0.486371	0.822353	0.514214	0.263085	0.477013	0.715115	0.769231	1.23596	0.564831	1.5408	0.331243	0.957621
0.865833	0.829065	1.07199	0.364557	0.835672	0.942926	0.847247	0.871491	1.7248	0.278535	0.688064	0.735129	1.11174	0.504132		0.865833	0.610984	0.997393	0.386631	0.423398	0.338753	0.861667	0.769099	0.0938572	1.08207	0.373874	0.666639	1.20391	0.772729		0.865833	0.43171	0.377459	0.759286	0.111182	1.26524	0.714766	0.711274	0.555734	0.398782	1.01402	0.923483	0.612705	0.434932
0.8675	1.04065	0.71231	0.115972	1.2052	0.318942	1.14445	0.511418	0.994742	0.0414497	0.29244	1.19551	1.47398	0.6911		0.8675	1.06766	0.908275	0.817473	0.402248	0.613	0.800417	0.216141	1.09979	0.519525	0.966744	0.914427	0.895553	1.07015		0.8675	0.417931	0.452187	1.01089	0.271539	0.294284	0.729958	0.549118	0.99083	0.0772903	1.02386	2.15829	0.288216	1.08829
0.869167	1.06993	1.03728	0.0779181	0.589499	-0.449147	1.54691	0.685955	1.72816	0.821568	0.166757	1.18105	1.06531	0.466023		0.869167	0.0440131	0.522102	0.887946	0.319767	0.196066	0.899397	0.615254	0.278987	0.754538	1.33918	0.827815	0.915475	0.802795		0.869167	0.660336	0.831856	0.591477	0.200025	0.321777	0.554229	0.637763	0.813473	1.05488	1.02972	0.687093	0.260603	1.39497
0.870833	0.323585	0.531576	0.267568	0.716332	0.321259	0.987318	1.23181	0.613083	-0.264886	0.605833	0.840164	0.754365	0.523606		0.870833	0.352835	1.0133	0.460113	0.392182	1.21969	0.611712	1.33027	0.00751448	0.786247	0.374662	0.915732	0.655424	0.764137		0.870833	0.516935	0.604108	0.534678	0.580411	0.38275	0.281647	1.22182	0.99272	-0.0858237	0.743283	0.934164	0.385555	0.746167
0.8725	1.92552	0.504827	0.0751272	1.11661	0.294603	1.36671	0.784159	1.89335	0.455634	0.683286	0.812839	0.380475	0.733802		0.8725	0.256514	0.874125	0.91348	0.856449	0.483966	0.6462	0.83861	-0.0851259	0.768919	0.381488	0.805186	1.28161	0.585603		0.8725	0.971041	0.692799	1.84601	0.419578	0.657059	0.392413	0.164942	0.776186	0.111426	0.487265	1.24386	0.453642	0.655558
0.874167	0.748289	0.459645	1.37503	1.16474	0.367453	1.37411	0.655248	1.22617	0.0704908	0	1.54308	0.505706	0.650689		0.874167	0.421426	0.633713	0.856397	-0.0636908	1.25856	0.38457	0.885395	0.473824	0.321412	1.09344	0.486381	1.62057	0.855521		0.874167	0.503156	0.589816	0.895587	0.76528	0.234739	0.555087	0.519221	0.542476	-0.431644	0.798616	1.45141	0.436843	0.320747
0.875833	1.43447	0.355151	0.76296	0.84191	0.342089	1.35833	0.652961	1.43579	0.474111	0.626136	0.909264	0.454349	0.555034		0.875833	1.46008	0.500472	0.940935	-0.00443679	0.977687	0.811314	0.603475	0.647794	0.452312	0.849252	1.09492	0.587237	0.971754		0.875833	0.791103	1.15262	1.22118	0.927807	-0.347058	0.531327	0.48368	0.872292	0.666489	1.28073	0.859239	0.49387	0.361383
0.8775	0.916854	0.55991	0.532253	1.1581	-0.136557	1.37438	0.712788	2.01605	0.246066	0.944403	0.918753	0.508809	0.331477		0.8775	0	0.819817	1.26917	0.567701	0.912254	0.769564	0.628193	0.467898	0.56932	0.449085	0.920213	-0.0754628	1.10249		0.8775	0.110237	0.692371	0.526418	0.311254	0.715261	0.740741	0.86555	0.999935	0.899042	0.935539	1.07155	0.170598	0.4171
0.879167	1.03538	0.635741	0.7588	1.13712	0.103206	1.19292	0.56934	1.70344	0.408848	0.741901	0.76036	1.21139	0.694053		0.879167	0.870128	0.70468	0.913048	0.412853	-0.174539	1.21139	0.550078	0.70425	0.407349	1.09397	0.581697	1.72297	0.724188		0.879167	0.727963	0.699072	0.12762	1.03738	0.166009	0.859372	0.289899	1.08837	0.350801	1.4437	0.483028	0.515519	1.12446
0.880833	0.349557	0.496535	0.601174	0.990788	0.0427207	1.02149	0.979692	1.56851	-0.0563385	0.288856	0.892727	0.612772	1.10181		0.880833	1.11705	1.12551	0.950488	0.100585	0.192765	0.734815	0.381396	1.2155	0.361694	0.781602	0.380952	1.80141	0.831965		0.880833	0.882807	0.661277	0.924759	0.890523	-0.114899	0.436462	0.259446	0.487524	0.583583	0.478526	1.3147	0.312272	0.305
0.8825	0.921885	0.78315	0.0549945	0.983984	0.502127	1.53526	0.748927	1.92332	0.600192	0.104622	1.45539	0.946583	0.447675		0.8825	0.939303	1.18114	1.23431	-0.183919	0.631038	1.01902	0.766643	1.09608	0.500555	0.648327	0.970014	1.4484	0.703205		0.8825	0.715354	0.693526	0.156422	1.00639	0.973081	0.830024	0.331471	0.389669	0.781125	0.758778	0.89177	0.582575	0.953689
0.884167	1.20278	0.527393	0.75808	0.547587	1.20329	1.88871	0.866329	1.20322	-0.165496	0.437664	1.02804	0.961148	0.950297		0.884167	0.798946	0.847071	1.11751	0.0812213	0.779812	1.11369	0.591716	0.842568	0.233001	0.740855	1.07147	0.839945	0.829029		0.884167	1.65599	0.825854	0.751351	0.759468	-0.144601	0.538306	0.354562	0.625283	0.977048	0.538479	1.19112	0.357887	0.525054
0.885833	1.06385	0.710569	0.425564	1.37441	1.16509	1.71516	1.43324	1.88225	0.303144	0.760472	1.52442	1.32967	1.09975		0.885833	1.19825	0.809522	1.25313	1.64695	0.738334	0.917194	0.736656	1.05163	0.635598	1.14765	0.459127	0.897256	0.996671		0.885833	0.328947	0.872905	1.53211	0.458265	0.247793	0.514216	0.18277	0.578381	0.874582	0.473357	1.29889	0.299203	1.31697
0.8875	1.11525	0.333932	0.353446	1.14373	0.0614306	1.15028	0.483277	1.26743	0.14205	0.456744	1.24463	1.13712	0.714177		0.8875	0.291624	0.666306	0.991394	0.579095	0.544993	0.157155	0.827288	0.346871	0.40429	0.651348	1.32814	1.11167	0.635109		0.8875	0.549632	0.416502	0.634444	-0.427391	0.463986	0.856898	0.468952	0.460961	0.757821	0.664909	1.68339	0.686843	1.4453
0.889167	1.04571	0.665765	0.621862	0.441538	0.769368	0.9867	0.545794	1.43756	0.591875	0.471369	0.69682	0.156708	0.592963		0.889167	0.986236	2.12608	0.819293	0.712217	0.66187	0.597125	0.555615	0.644771	1.02536	0.547722	0.776284	0.631667	0.899955		0.889167	0.48253	0.44338	1.06083	0.413663	0.785182	0.51437	0.0208639	0.619264	0.52335	0.697256	0.822618	0.355887	0.421464
0.890833	0.904959	0.549753	0.498292	0.589734	0.394577	1.15707	0.0912906	1.56107	-0.121265	0.329184	1.57808	0.54143	0.900013		0.890833	0.722282	2.47629	1.2215	0.155036	0.533857	1.62402	0.92158	0.932514	0.781198	1.45984	1.10936	0.924807	1.39599		0.890833	0.685119	0.728332	0.583205	-0.163969	0.188677	0.513611	1.14916	1.00262	0.244832	0.804258	1.03662	0.418611	1.25511
0.8925	1.16973	0.725906	1.09937	0.709861	0.0207382	1.8539	1.17994	1.39004	-0.214422	0.603375	1.33376	0.771274	0.794456		0.8925	0.892779	1.06279	0.716816	0.167478	0.510508	0.427975	0.587766	0.768441	1.04629	0.700124	0.299414	0.697757	0.944267		0.8925	0.736953	0.589571	0.81756	0.168075	-0.160577	0.551779	0.717992	0.733296	0.506525	0.869116	1.43824	0.150173	0.43777
0.894167	0.214467	0.246407	0.718705	1.79548	1.10993	1.09006	1.01464	1.10366	0.21173	0.651917	0.633446	0.733043	0.480759		0.894167	0.580371	0.422812	0.905416	0.547414	0.879397	1.39185	0.745125	0.655803	0.476438	0.667533	1.15641	1.01504	0.237197		0.894167	0.768544	1.17391	1.04228	0.144066	0.403979	0.152449	-0.0320499	0.771792	0.600069	0.794479	1.12874	0.51752	1.95543
0.895833	1.24485	0.2722	0.185875	1.39965	0.677393	1.35365	0.708212	1.36749	-0.568824	0.369185	1.00079	0.548968	0.654265		0.895833	0.657549	0.408036	0.905075	-0.0525295	0.963472	1.16526	0.754132	0.835675	1.24485	0.649319	0.566989	0.914577	0.896626		0.895833	0.608876	0.625715	1.22066	0.18624	-0.047699	1.93615	0.394518	0.546257	0.0609505	0.393193	1.25874	0.146404	0.971695
0.8975	0.919029	0.85463	0.279002	1.48819	-0.394501	1.59345	1.21298	0.848228	1.57482	0.455505	1.1325	0.230632	0.986405		0.8975	0.291617	0.887673	0.802433	0.655559	0.760506	0.441529	0.498525	1.01473	0.76599	0.753664	0.273494	0.785232	0.417999		0.8975	0.656971	0.450161	0.621937	0.658727	0.394983	0.782683	0.211667	1.31053	-0.18176	0.72805	0.706542	0.593057	0.97455
0.899167	0.650924	0.253186	0.699892	0.444003	0.730077	1.39679	1.4492	1.5859	0.184568	0.427124	1.14044	0.890353	0.605183		0.899167	0.866255	1.0549	1.24648	0.0403571	0.346365	1.18047	1.0586	0.997309	0.872768	0.556351	1.03937	1.16624	1.0667		0.899167	0.55037	0.826254	1.95743	0.377181	0.0590347	0.686975	0.460629	0.574509	0.562636	0.657954	1.19963	0.214952	1.53879
0.900833	0.91899	0.792608	0.570553	0.665865	0.603669	1.14169	1.52137	1.77348	-0.127291	0.44245	1.13305	0.978729	0.730703		0.900833	0.998307	1.24453	1.10469	0.123691	0.855139	0.925897	0.611567	0.494194	1.02334	0.362069	1.54841	0.43749	1.27609		0.900833	0.657149	0.598572	0.641398	0.612835	0.217989	0.548968	0.527112	1.32353	1.20284	0.31501	1.42353	0.632031	1.31153
0.9025	-0.120187	0.397639	0.965108	1.2817	0.595557	1.7386	0.958319	1.13241	0.778513	1.09414	1.10584	0.428798	0.749834		0.9025	0.214694	1.08163	0.821497	0.278218	0.674588	0.205955	1.50977	0.706521	0.857706	1.01378	1.18939	0.716343	0.748135		0.9025	0.664025	0.85859	0.987862	0.727852	0.551169	0.514242	0.545057	0.706064	0.899951	0.703394	1.31869	0.807205	0.573363
0.904167	0.922762	1.01441	0.0531377	1.50273	1.10822	1.4684	1.76819	1.58101	0.0437344	0.406281	0.467181	0.400766	1.01663		0.904167	0.794516	0.466488	0.667515	0.120424	0.757953	0.587089	1.33497	0.613945	0.488219	0.48803	0.77101	0.927877	0.965048		0.904167	0.437541	0.734468	1.23057	0.791503	0.128047	-0.466893	0.996052	0.833672	0.307897	0.564423	0.566313	0.465855	0.733956
0.905833	0.731511	0.621067	-0.128336	1.32566	-0.119166	1.61889	1.45228	0.716391	0.725536	0.304488	1.05887	2.13305	0.369477		0.905833	0.733154	1.13631	0.802128	0.103582	1.61589	0.644232	1.10483	1.04481	0.313951	1.28694	1.19778	1.47895	1.20604		0.905833	0.619551	0.834171	0.825282	-0.139644	0.658509	0.351818	0.789476	0.412559	0.585246	0.766543	1.51214	0.402884	0.656947
0.9075	1.29785	0.167189	-0.384433	1.43732	1.24995	1.11526	1.00107	1.99408	-0.3573	1.02952	0.687185	1.76713	0.673915		0.9075	0	0.799201	0.967566	0.690413	0.406896	0.734793	0.811948	0.999915	0.207189	0.60485	0.0211963	0.590712	0.379099		0.9075	0.282461	0.352156	0.74216	-0.500687	-0.103839	0.641891	1.48493	0.929759	0.495335	1.22793	1.11989	0.232992	1.63538
0.909167	0.257914	0.167455	0.0335472	0.838856	0.447968	2.26985	0.500074	1.52386	0.00826776	0.927898	0.595935	-0.0216826	0.969117		0.909167	0.568219	0.564913	0.337524	0.213308	1.08883	1.13263	0.277837	1.21159	0.702128	0.35276	1.23861	0.400185	1.57292		0.909167	0.903955	0.88778	0.709877	0.316125	0.117062	0.515143	0.147067	1.32246	0.945569	0.886102	1.64346	0.382995	0.46202
0.910833	0.885052	0.950845	0.305154	0.40529	0.838137	0.796596	1.26647	1.08092	-0.0076955	1.32946	0.999043	0.791574	1.20943		0.910833	0.471709	0.26864	0.826096	0.600683	0.895924	1.15166	0.632404	1.19918	1.13966	-0.108327	1.20589	1.149	0.694158		0.910833	0.697523	0.480591	0.26566	0.213745	0.769142	-0.39214	0.137781	1.47114	1.26476	1.13117	0.748005	0.344249	0.653038
0.9125	1.46878	0.653677	0.495107	0.50095	-0.20539	0.417188	1.0011	1.40598	0.798892	0.613315	0.696678	0.839056	0.656829		0.9125	1.09182	0.466675	0.779008	0.101774	0.610668	1.08026	1.12582	1.32861	1.139	0.368673	0.936388	0.759159	0.299529		0.9125	1.03383	0.368701	0.35401	1.0146	0.660779	0.513118	0.896221	0.527056	-0.300999	0.800433	1.03444	0.879413	0.0673953
0.914167	0.757693	0.71966	0.386458	0.554395	0.562543	1.20655	0.594286	1.21722	0.0855452	0.0839807	1.12767	1.02327	0.697225		0.914167	1.29292	0.792459	0.941088	0.116764	0.72676	1.53755	0.613289	0.310644	0.924397	0.440066	0.471992	0.862807	0.697247		0.914167	0.488498	0.712061	0.618985	1.06398	0.286765	0.509899	0.5113	1.51242	0.618559	0.917095	0.945034	0.520508	2.09503
0.915833	0.961351	0.66725	0.697344	1.17689	0.945754	1.0004	0.385129	1.24686	0.105964	0.309981	1.95092	1.33792	0.369084		0.915833	0.87234	0.633467	1.01736	0.932675	0.503609	1.35854	0.646217	0.535646	0.633152	1.22937	0.578183	2.21242	0.667557		0.915833	0.671156	0.669106	1.25274	0.279406	0.121502	0.689715	0.99557	0.330375	0.963129	0.610141	0.934083	0.379515	1.60627
0.9175	1.38654	1.28926	0.703959	0.276531	0.696974	1.24025	1.50903	1.82898	0.685814	0.530695	0.87231	1.04705	0.653566		0.9175	0.860858	0.922102	1.058	-0.147103	0.292532	0.524424	0.571586	0.544932	0.795662	-0.564801	0.594682	1.29791	0.760704		0.9175	0.339443	0.337147	0.851287	0.331087	0.5357	-0.022078	0.449735	0.575005	0.840339	0	1.13311	0.450634	1.08728
0.919167	1.05276	0.839648	1.08063	1.97102	1.09679	0.847598	0.668927	1.17565	0.767765	0.395405	0.905909	0.297026	0.669416		0.919167	0.383099	0.897025	0.231823	1.10323	1.10188	0.475186	0.34089	0.98616	0.683542	0.643776	1.07566	0.391845	1.28246		0.919167	0.367757	0.0226255	0.258521	0.457938	0.242864	1.18914	0.263762	0.659413	0.584716	0.859107	1.02287	0.884881	0.987513
0.920833	1.07986	0.362166	0.434688	1.43454	0.603509	1.44606	0.874316	1.56077	-0.11014	0.542831	0.720788	0.709692	0.600523		0.920833	0.343407	0.693285	-0.0211748	-0.581387	0.364791	0.262095	1.109	1.06681	0.721976	0.520063	0.574872	1.24155	0.778177		0.920833	0.109996	0.796504	0.515972	0.36646	0.918273	1.08823	0.0347281	0.715571	0.650127	0.364042	1.31445	0.254999	0.541899
0.9225	0.909638	0.412967	0.39716	0.532981	-0.636353	1.51748	1.13215	0.853864	-0.0850869	0.433016	0.964478	0.614763	0.637909		0.9225	0.218981	0.921394	0.687815	-0.219681	0.253968	0.866286	0.189637	0.806799	0.57889	0.311475	0.596977	0.686239	0.816309		0.9225	0.542545	0.644301	0.679587	0.187672	0.00803566	1.07776	0.681342	0.836599	0.47104	0.773202	0.509392	0.403106	0.971532
0.924167	1.43755	1.04889	0.439773	0.988122	-0.808031	1.22349	0.619042	2.03521	-0.09956	-0.58878	1.31744	1.07436	0.443174		0.924167	0.791122	0.315249	-0.12886	0.527851	1.04703	0.978833	0.929227	0.366879	0.212861	0.222681	0.433041	1.92004	1.21996		0.924167	0.502524	0.843976	1.45054	1.46134	1.12716	1.03696	0.910176	0.347026	0.920297	1.16653	1.28451	0.237874	1.01039
0.925833	0.542884	1.27266	0.85022	0.8285	-0.0749691	0.636943	1.72815	0.730034	0.524788	0.377739	1.14684	0.828139	-0.0864622		0.925833	0.153866	0.949318	0.82247	0.0804137	0.755572	2.1459	1.05818	0.481927	0.827481	0.407274	1.6429	0.671062	0.985862		0.925833	0.808625	0.745236	0.661863	0.729419	-0.0751864	0.420187	0.873609	0.237756	0.0607566	1.20682	1.00923	0.889435	1.42167
0.9275	1.90023	0.811266	0.711427	0.0210349	0.95285	0.355025	0.237751	1.44328	-0.00137305	0.0831756	1.07405	0.220716	0.394028		0.9275	0.58427	0.881271	0.906504	1.00021	0.217184	0.665408	1.01402	1.10429	0.603084	0.271651	0.469213	0.665964	0.880017		0.9275	0.225246	0.758742	1.22531	0.516005	-0.0814078	0.373766	0.685611	0.59893	0.29224	1.13729	0.696546	0.167926	0.73104
0.929167	0.693781	0.49254	-0.0169521	0.79623	0.34486	1.7241	0.612937	1.41712	0.393424	0.516753	1.1242	1.08087	1.56313		0.929167	0.830274	0.801839	0.730366	0.896251	0.852097	1.39145	0.791304	0.268392	0.848527	0.388307	0.630928	1.05541	0.680078		0.929167	0.738536	0.756816	0.530322	0.365018	-0.234288	0.83051	0.756649	0.175627	0.79904	1.30854	1.25734	0.983963	1.34065
0.930833	0.0905799	1.16199	0.28803	0.482615	0.0666872	1.56115	0.888772	1.26699	0.51221	0.368068	1.51521	0.769807	1.10414		0.930833	1.43815	0.26328	0.468245	-0.247005	-0.217127	0.433692	0.943234	0.717601	0.230502	1.48631	0.4007	1.14267	0.798981		0.930833	0.907935	0.262364	0.849731	0.830682	0.045595	1.07647	0.714248	1.18637	0.625618	0.250057	1.06228	0.209908	0.595619
0.9325	1.30961	0.788611	0.831052	1.50612	0.0120096	0.585303	1.55813	2.09313	0.436811	0.61282	1.19874	0.834596	1.33222		0.9325	0.932815	0.846606	0.648859	-0.105601	0.0634249	1.15583	0.824176	0.996351	1.66762	0.262901	1.01805	-0.227171	1.49656		0.9325	0.901984	0	1.45093	0.0758917	0.732583	0.936105	0.209857	0.153539	0.535043	0.669075	0.74852	0.106033	0.574937
0.934167	1.31333	0.310199	0.373441	1.28508	0.357599	1.82578	1.08623	0.901222	0.126564	0.805469	1.05965	0.966672	1.16204		0.934167	0.704256	1.34341	1.41543	0.292318	0.430904	0.709291	0.463832	-0.266263	0.911049	0.309472	1.13941	1.32052	1.40071		0.934167	1.13862	0.631891	2.37786	0.225236	0.278279	0.780725	0.766108	1.17537	0.631134	0.316391	1.07231	0.216446	1.5609
0.935833	0.992784	0.732739	-0.0911776	0.883541	-0.718222	0.978155	0.554655	0.997258	-0.3687	0.626462	1.04917	0.560599	0.70466		0.935833	0.664776	0.210755	0.717815	1.59735	0.786882	0.835607	0.649677	1.06059	0.719691	0.802356	0.860086	1.28963	0.963916		0.935833	0.0673809	0.727209	0.754056	-0.556747	-0.473822	0.724746	0.275307	0.88162	0.315521	0.620091	0.453823	0.406	0.460874
0.9375	1.20788	0.673968	1.67946	0.65504	0.610841	0.301332	0.901547	1.2165	0.258095	1.00136	1.0047	0.705981	0.737463		0.9375	0.473816	0.858932	1.13304	2.05395	0.582373	0.628983	0.619063	0.535833	0.86003	0.413412	0.801022	0.848279	0.488105		0.9375	1.89415	0.503117	0.894262	0.599369	1.54931	0.951833	0.686303	0.613672	0.800785	0.706343	0.844951	0.700325	-0.108973
0.939167	0.574642	0.920965	0.347292	1.1398	0.649453	1.02716	0.521395	1.00548	-0.242595	0.291989	1.6195	0.796231	0.658706		0.939167	0.414594	0.90548	0.8124	0.173333	0.408497	0.413873	1.12503	1.06616	0.640068	0.448095	1.48387	0.454826	0.291551		0.939167	0.23025	0.819138	0.125566	-0.373904	0.86177	1.26041	0.193667	0.242408	0.668521	1.70468	1.44771	0.678872	1.45229
0.940833	0.580212	0.719646	0.684771	0.977309	-0.0532771	0.24421	0.916108	1.40362	0.417865	0.190484	1.22868	0.641522	0.436424		0.940833	0.717235	-0.0440963	0	0.0361352	0.81167	0.86604	0.500636	0.57392	0.85246	0.930502	0.583832	1.27015	1.04749		0.940833	1.26129	0.595352	1.02184	0.22319	0.0574591	0.546878	-0.0441046	0.576535	0.283754	1.01981	1.92359	0.38113	1.46842
0.9425	1.30903	0.663144	0.350468	1.20048	0.0772535	0.385912	0.394613	0.896989	0.242514	0.457314	1.02528	1.22171	0.578097		0.9425	0.562272	0.761768	0.979965	1.38767	0.690039	0.535058	1.13507	1.21324	0.449025	0.531526	0.399529	0.504294	0.804365		0.9425	0.742457	0.806627	0.784159	0.102176	-0.273307	0.553649	0.931382	0.642076	0.432764	1.04024	1.19817	0.343613	0.046047
0.944167	1.1461	0.410585	-0.583215	1.33145	0.320073	1.26911	0.53693	2.13613	0.856895	0.602209	0.592154	0.639302	0.688039		0.944167	0.411158	-0.0932096	0.64244	1.22069	0.794128	0.519236	0.0635297	0.736111	0.509565	0.759015	0.870341	1.30986	0.571889		0.944167	0.636999	0.708733	1.43042	1.25393	0.477057	1.00915	1.18427	0.516562	0.436812	0.631993	0.267475	0.832712	1.30549
0.945833	0.743933	1.02601	0.547459	1.28067	0.482453	1.30448	0.450512	1.80207	1.09021	0.833889	0.996781	0.267296	0.693887		0.945833	0.568169	0.82918	1.51425	2.37831	0.199769	0.953591	0.999396	1.51986	0.999522	1.27736	0.551291	1.2805	0.452557		0.945833	0.623629	0.633977	0.863547	-0.117261	0.976314	1.02241	0.224525	0.88136	0.738895	1.08988	0.552193	0.918053	0.386608
0.9475	0.947799	1.33492	0.0121002	0.604671	1.07053	1.32332	0.777006	0.831791	0.184326	0.672467	1.34157	1.26142	0.509594		0.9475	1.23101	1.0975	0.673693	1.39452	-0.187813	0.638849	0.105606	0.244502	0.788677	0.982411	0.043176	0.318392	0.82126		0.9475	0.665262	0.65949	0.468241	0.0612397	-0.0218849	1.27144	0.527495	1.09871	0.195246	0.469737	0.750039	0.803927	0.786502
0.949167	0.798409	0.415041	1.53751	1.26148	1.45721	1.18433	0.448689	1.4057	0.0510783	0.405918	1.09468	0.79874	0.877193		0.949167	0.637668	0.339958	0.212644	0.58941	1.28499	1.6045	0.234722	1.09929	0.958961	0.29403	0.763209	0.752975	1.17253		0.949167	0.532363	1.0182	1.1657	0.729107	0.371711	1.23142	0.452497	0.212703	0.0273361	0.709841	1.13936	0.335352	0.30803
0.950833	1.29976	0.312454	0.757624	0.82947	0.193624	1.95049	0.78459	1.19753	0.996813	0	1.73151	0.600009	1.30244		0.950833	0.85565	1.44036	0.451904	1.00936	0.610526	0.527867	0.511683	0.946191	0.628794	1.05043	-0.19875	0.307979	1.82086		0.950833	1.20759	1.0083	1.10988	0.802389	-0.0672433	0.346373	0.701385	0.557976	0.979522	0.506003	-0.110975	0.254609	1.12383
0.9525	1.00686	0.860638	1.00202	0.963048	-0.0587769	2.11564	1.10004	1.19686	0.360682	0.581782	1.3578	1.24688	0.824803		0.9525	1.4432	1.05365	0.794071	0.430127	0.381219	0.644845	0.462486	1.8263	0.390818	0.219069	0.754864	0.370844	0.851934		0.9525	1.09195	0.405332	0.982678	-0.0966576	0.962316	1.20924	0.486469	0.952086	0.354096	1.46624	0.97704	0.854062	0.832741
0.954167	0.914201	0.915825	0.568627	0.884695	0.823095	0.854451	0.660034	0.937266	0.339422	0.801463	1.20292	0.97141	0.969535		0.954167	0.428311	1.09065	0.377467	-0.894435	0.382914	1.42538	0.722252	0.453217	0.760456	0.431655	1.11027	0.243343	1.138		0.954167	0.814924	-0.156617	0.752564	0.571459	0.0223767	0.440966	1.25879	-0.0657678	0.566292	1.04131	1.28543	1.28024	0.990766
0.955833	1.34747	0.0828466	0.613667	0.624662	0.403458	1.74179	0.891605	1.29245	-0.114297	0.123987	0.764431	1.56118	0.200597		0.955833	0.812437	1.14215	0.749906	0.143023	0.800522	0.587503	0.767885	0.83545	0.833316	0.550054	0.516207	1.01863	0.826267		0.955833	0.795459	0.562247	0.887928	0.385071	0.319675	1.49194	0.575831	0.633215	1.11285	0.407341	0.660255	0.190267	0.493312
0.9575	0.541602	0.72058	0.234707	0.456384	0.382003	0.913747	1.53127	1.20842	0.556243	0.417266	1.57339	0.394875	0.388123		0.9575	0.397518	0.124263	0.607375	0.432242	0.229482	0.648364	0.316736	0.228449	0.939067	1.08568	0.842176	1.33827	1.30483		0.9575	0.597583	0.53508	1.19253	0.860542	0.545835	0.975462	0.154533	0.765261	0.238996	1.22252	1.31369	0.127787	0.987989
0.959167	0.36867	0.254248	0.0775166	0.497008	0.685259	1.21474	0.746523	1.2413	0.575125	0.524098	0.936271	0.649452	0.260309		0.959167	0.868961	0.308656	0.22023	0.549068	0.812105	0.534381	1.36203	1.00996	0.659935	0.000766516	0.666882	0.305483	0.883783		0.959167	0.617072	0.285307	0.710557	0.561794	0.608176	0.918495	0.479644	0.751864	-0.430083	1.11893	1.03059	0.251762	0.772814
0.960833	0.879307	0.818649	0.925865	0.492822	0.577399	0.818029	0.63319	1.17233	-0.121388	0.467955	1.66341	1.01778	0.38501		0.960833	0.0915688	1.06105	0.748437	0.905001	0.275225	0.691359	0.659984	0.782148	0.472275	0.296652	1.1551	0.718321	1.05304		0.960833	0.879111	0.388635	0.7545	0.257811	0.0380559	0.465983	0.797176	1.02946	0.324652	1.02749	0.636425	0.382954	1.38065
0.9625	1.29131	0.676479	0.664817	0.497172	1.03287	1.28966	0.295612	0.852152	0.542099	0.887938	1.27116	1.12072	1.23382		0.9625	1.04643	0.511018	0.355082	0.382126	0.823428	1.373	0.692579	1.22902	0.441891	1.201	1.41544	0.826005	0.738739		0.9625	1.39706	0.301004	0.332572	0.305902	0.378221	0.656426	0.602842	1.3505	0.298381	0.870482	1.12803	0.697685	0.406617
0.964167	0.511346	0.465411	0.688531	0.76089	0.791938	1.48185	0.668436	1.45668	-0.0455441	0.664038	1.08376	0.410472	0.571876		0.964167	0.69949	1.67492	0.489039	0.0519229	0.45245	0.961596	0.583589	1.14792	0.581671	0.487249	-0.149777	1.61213	1.11116		0.964167	0.428894	0.297917	-0.198669	0.184883	-0.243081	0.375211	1.07469	3.05056	0.591758	0.994818	2.11616	0.0220245	0.699704
0.965833	1.36352	0.833013	0.814176	0.297429	0.127827	1.44874	1.18929	2.62243	0.544417	0.410863	1.01775	0.9521	1.00915		0.965833	0.999522	-0.28867	0.578035	-0.248217	0.191947	0.334223	0.97468	0.698586	0.876571	0.198562	0.785613	1.6348	0.862613		0.965833	0.366585	0.31985	0.343019	0.801654	0.398106	0.760392	0.687873	1.67257	0.364226	0.58354	0.682765	1.05992	0.3888
0.9675	1.1554	0.685254	-0.108734	1.54728	0.746443	2.25061	1.3686	1.47103	0.110662	0.454358	1.56892	0.822515	0.632001		0.9675	0.0875542	0.413383	1.27446	0.167997	0.130129	1.06963	0.548061	0.402346	0.759301	0.912991	0.845089	1.21248	1.52682		0.9675	1.04461	1.30719	1.69471	0.169957	0.28783	0.8285	0.661711	1.10615	0.276669	0.61187	1.34831	0.600562	0.417587
0.969167	0.799766	0.326431	-0.287565	1.3386	0.246449	1.56899	0.647623	1.51638	-0.161434	0.0820345	1.13253	0.580558	1.09066		0.969167	1.23513	1.74331	1.29179	0.175415	0.399798	0.650238	0.795733	1.07865	0.299427	0.7215	0.671747	1.16724	0.785443		0.969167	0.399361	0.270057	0.535761	0.630025	0.996743	0.211882	1.00293	0.42425	1.03117	0.385908	1.32683	0.326101	0.635745
0.970833	0.858343	0.567453	-0.168527	1.37325	-0.0393115	1.48267	1.12105	1.09375	-0.408779	0.398448	0.858082	0.941599	0.194179		0.970833	0.439638	1.34349	0.591496	0.126858	0.278313	2.09479	0.985573	0.215594	0.382312	0.788562	0.752575	0.525165	0.0647319		0.970833	0.919097	1.22681	1.98066	1.10629	0.239803	1.12629	1.39757	0.676664	0.905822	0.690052	1.43032	0.735915	0.797058
0.9725	0.384157	0.48352	0.410373	1.02682	-0.0274292	1.20667	-0.310662	1.25094	0.135787	0.190062	1.39702	0.576548	0.211484		0.9725	0.683557	0.907317	0.442282	0.207832	0.642357	1.7113	1.10189	0.626295	0.660305	1.04526	1.24032	0.590124	0.46731		0.9725	0.110392	0.80468	1.55814	0.445995	0.261319	0.337823	1.13111	0.681918	1.08787	0.366813	1.44001	0.0214284	0.798751
0.974167	1.34678	0.995814	0.565762	0.49646	1.23247	1.50147	1.24078	0.728192	0.239081	0.348596	0.771074	0.635268	1.07948		0.974167	0.724034	0.921976	0.632139	0.221937	0.491537	1.56527	0.613056	0.693426	0.630226	0.746458	0.323995	0.661339	1.31752		0.974167	0.274417	0.360101	1.9035	0.603298	-0.381857	0.9773	0.181638	0.847647	0.291127	0.645727	0.874106	0.279648	1.3873
0.975833	1.44382	0.954317	1.71893	0.791139	0.889263	0.878932	1.09639	1.5184	0.680874	0.327768	1.07204	1.18877	1.01395		0.975833	0.912575	0.11938	0.410119	0.458558	0.627195	1.12827	1.21	1.18511	0.750203	0.682122	0.975377	0.710063	0.811584		0.975833	0.622374	0.504099	1.01732	0.462208	-0.301482	1.03479	-0.075865	1.38013	0.157986	0.669792	1.22255	0.623307	0.721317
0.9775	1.16616	0.741714	0.526389	0.977372	0.534481	0.421292	0.995842	1.80034	0.868514	0.251641	1.2354	0.709479	0.375156		0.9775	0.795686	0.754979	0.42272	-0.236026	1.06938	0.886873	0.921205	0.418911	0.309113	0.777226	0.201275	1.62292	0.61512		0.9775	0.254669	1.11866	0.227801	-0.188058	-0.221143	0.663641	0.604671	0.22484	0.376297	1.08362	0.849433	0.0629327	0.474367
0.979167	0.824326	1.01449	0.451693	1.2283	0.373392	0.790432	1.36554	1.07847	0.136018	0.548963	0.977822	0.671652	0.515165		0.979167	0.62531	0.835657	0.629381	0.25773	0.583188	1.0179	0.821935	0.795293	0.724483	1.03631	0.152025	1.18708	1.01924		0.979167	0.672174	0.642274	1.04588	-0.211477	-0.223451	0.736425	0.298873	0.432591	0.251337	0.622321	1.12802	-0.783665	0.672204
0.980833	0.473824	0.542016	-0.280786	0.808458	0.806473	0.957157	0.771801	1.74951	0.0796329	-0.0618697	1.03807	0.949586	0.893123		0.980833	0.381372	0.32927	1.54241	0.33619	0.283533	1.17198	0.831964	1.03889	1.2472	0.408725	0.806276	1.76753	1.21354		0.980833	0.832389	0.987866	0.227532	1.22067	0.0352439	0.335136	1.03472	0.795939	0.457268	0.465734	0.953247	0.454634	1.87959
0.9825	0.915301	0.794168	0.0429747	0.685429	0.530776	0.709042	0.744421	1.57674	0.184278	0.337724	1.14938	0.980413	0.921871		0.9825	1.07916	1.04204	0.62196	1.16864	0.879225	1.2987	1.22049	-0.0979381	1.61057	1.03191	0.260101	0.813369	0.656085		0.9825	0.54181	1.01943	1.01557	0.255099	-0.586025	1.10659	1.40563	0.455206	0.769644	1.10137	1.50359	0.638078	1.11471
0.984167	3.13188	0.669697	0.93972	1.1006	0.122802	1.11693	0.588961	0.726712	0.520188	0.105525	0.975154	1.3016	0.493467		0.984167	1.14711	0.8939	0.222677	0.288772	0.641355	2.05114	0.612862	0.644345	0.794231	0.762115	0.748663	0.885443	1.46218		0.984167	-0.433582	0.696606	0.505002	1.19389	0.272382	0.788955	0.619415	0.398274	0.107971	0.046799	1.59387	0.46374	0.56404
0.985833	0.375545	0.57021	0.0891067	0.41963	1.09169	2.40184	0.616972	1.33849	-0.00783402	0.0818867	0.849672	0.196885	0.765713		0.985833	1.07604	2.23315	0.175882	0.772709	0.400962	1.14311	0.511258	0.637984	1.12764	0.584854	0.904763	-0.457429	0.878624		0.985833	0.0214952	0.417959	0.490789	1.40744	1.34041	1.52938	0.426152	1.49184	0.586655	0.805987	1.48565	1.13685	1.99476
0.9875	0.444724	0.311747	1.14681	0.734291	0.0750712	1.97006	0.620214	1.40734	-0.0839881	0.549207	1.53317	0.807497	0.381089		0.9875	0.529462	0.931799	0.655508	0.309979	0.663797	0.776043	0.226753	0.765432	1.01242	0.476774	1.01219	1.6849	0.628799		0.9875	0.529101	-0.151627	0.35093	0.673877	0.110508	2.23928	0.38532	0.896861	1.15427	0.316534	0.895001	0.816092	1.02158
0.989167	1.4203	0.754306	0.332789	0.399353	0.346154	1.42361	0.290213	0.779423	-0.208813	0.242233	0.461787	0.371025	0.194746		0.989167	1.12742	0.870052	0.197239	0.513782	1.22431	0.577825	0.651721	0.27684	0.562371	0.690116	1.1794	1.05997	0.808356		0.989167	0.476374	0.72459	0.469846	0.599423	0.112244	0.736904	1.08953	0.894324	0.51037	1.24661	1.08033	0.890859	1.38614
0.990833	0.934901	0.756764	0.599862	1.0412	1.45028	0.481514	0.0959022	1.96626	0.808869	0.501977	1.17968	0.860863	0.400996		0.990833	0.194376	1.08934	0.644989	0.738541	1.36426	1.02218	0.543387	0.698569	0.952099	0.75909	0.913719	0.716211	1.63917		0.990833	1.10774	0.810736	1.05801	0.344378	0.988316	1.128	-0.121999	0.552096	0.563257	1.2884	0.919777	-0.264457	0.640193
0.9925	0.754312	0.121931	-0.223452	1.0811	0.380533	1.13042	0.857167	0.905856	0.801473	0.512989	1.87069	0.770383	0.417258		0.9925	0.574212	0.278424	0.823991	0.808204	0.799293	1.51828	0.25428	0.56566	0.171046	0.599439	0.279811	0.755833	0.638665		0.9925	-0.427696	0.757559	0.127005	0.837029	-0.692932	0.753028	0.694311	13.7524	0.419741	0.230001	1.20432	0.447437	1.10757
0.994167	1.95276	0.854562	0.48771	0.732478	1.18141	0.884751	0.380134	1.48498	-0.877741	0.351167	0.670227	1.5626	0.599597		0.994167	0.67981	0.547276	1.33713	0.347387	0.550055	1.49858	0.74726	0.770332	0.924642	0.784859	0.836856	1.00443	0.953471		0.994167	0.242168	1.02788	1.19507	-0.248959	-0.371007	0.658118	-0.197754	12.5506	1.29775	0.877943	1.31444	1.38103	0.448273
0.995833	0.0140274	1.13916	0.194639	0.829979	0.605958	1.14741	1.49387	1.22211	2.9659	1.08698	0.06348	1.0884	1.1372		0.995833	0.494805	0.792038	0.784979	0.961537	0.678842	1.69056	0.810978	0.0883018	1.01361	0.317661	0.717953	0.991315	0.943594		0.995833	0.268336	1.32862	0.739641	0.285604	0.224795	13.2164	1.90863	1.80693	4.83514	0.363579	1.36295	10.5214	0.696732
0.9975	1.79377	1.19165	-0.0513799	1.38931	5.73395	1.46575	0.813217	1.60014	5.39329	0.637821	2.9924	0.328465	0.601		0.9975	0.573825	0.538916	0.266999	0.193496	0.343362	1.12986	0.863776	1.69502	1.04412	0.799341	1.73921	0.650589	0.946193		0.9975	0.804829	0.769011	0.349016	1.14617	2.65865	3.67267	2.76174	1.38898	32.7785	5.62947	23.6124	6.0351	0.873605
0.999167	1.49397	3.66826	10.8836	1.35138	3.621	1.48007	6.74634	1.26896	5.28563	1.01814	16.296	0.858424	0.429065		0.999167	0.833187	37.3162	7.61823	0.286894	0.918896	1.79451	0.0428973	2.08488	3.88018	5.47568	1.20614	1.37797	0.02124		0.999167	0.457634	0.801789	1.52097	12.2628	5.26043	3.02221	5.26786	1.29083	3.69431	2.33528	24.0737	1.08937	1.10338
1.00083	0.82188	11.6732	21.7526	2.67511	8.40657	4.73943	11.9602	16.9164	2.67073	1.72597	19.0823	0.934018	2.01491		1.00083	3.4847	7.43465	15.2057	0.617586	26.9763	9.79661	2.15604	1.09499	2.99168	12.3387	15.2555	2.02443	1.20984		1.00083	0.98506	5.36497	15.9987	19.289	1.89832	1.64748	2.317	-0.0220916	0.670477	5.74147	2.6075	0.243427	0.812085
1.0025	14.0969	0.689828	6.89729	7.17281	3.19796	8.07442	3.26822	24.142	1.50596	2.11135	10.5894	2.10348	4.84778		1.0025	29.8238	11.1413	3.38421	13.2857	5.21463	7.80799	3.6194	0.0449766	2.76798	8.66923	2.62346	84.3767	0.815337		1.0025	26.0132	6.60347	13.7462	40.5617	2.66764	0.109046	2.61895	1.24686	1.44651	8.44108	2.04991	0.496121	13.2964
1.00417	15.6319	12.0917	2.0459	7.70376	1.13902	1.51543	0.741831	1.68724	1.32758	1.42043	4.44642	0.303576	2.84458		1.00417	11.0555	2.40873	0.968097	13.3084	1.02123	5.15324	4.98377	1.86606	1.65303	2.25405	5.10659	274.273	6.61413		1.00417	24.6569	1.74501	4.67549	3.14332	0.119506	1.76538	1.4733	0.613484	0.44623	2.0156	1.60687	0.862989	11.4334
1.00583	5.59045	10.0984	1.70493	3.9012	0.539723	2.17433	0.560885	2.53545	1.42881	1.03659	3.78444	7.4928	0.0629882		1.00583	0.740418	1.18236	1.6198	3.71558	1.08008	0.868909	1.19536	8.08108	3.10353	1.05295	0.629668	4.07302	29.8187		1.00583	1.62863	0.532564	1.37701	0.926998	3.422	0.612771	1.22295	0.914038	1.23358	1.07706	3.32828	0.403705	7.69791
1.0075	1.03209	1.42621	1.83915	1.96817	0.75396	1.05217	0.63846	2.51204	1.25761	0.725765	1.5576	3.47163	1.5308		1.0075	0.961959	1.40159	2.00861	1.51921	34.886	5.1205	0.10823	1.83731	1.02855	2.18397	1.34524	2.62072	22.4654		1.0075	1.07542	0.674039	2.19976	0.425707	1.38643	1.28112	1.28398	0.633492	1.63321	2.29431	1.66035	-0.0870834	2.40646
1.00917	2.30855	1.14042	1.01027	1.76678	1.03963	0.704882	1.69333	1.09914	0.268851	1.19875	1.59057	3.09231	0.428936		1.00917	1.65517	1.99592	1.03996	0.970995	50.8161	1.75248	0.545794	20.7842	1.68292	1.30069	1.02539	2.66038	39.1118		1.00917	4.56785	1.20342	2.30751	1.26483	0.861966	0.824134	1.11168	1.12083	1.88069	0.531521	1.45026	0.719142	-0.233896
1.01083	2.02153	1.24482	0.828274	1.49634	0.701212	1.8556	1.7328	1.95832	0.698707	1.28391	2.078	1.09819	0.949647		1.01083	1.09263	1.30358	0.958376	1.62089	0.170292	0.352619	1.09888	8.347	1.36467	1.24239	1.08916	1.6953	1.32327		1.01083	2.87525	0.335091	0.869953	1.45423	0.496779	1.49826	0.43197	0.470961	0.616976	0.533974	1.71268	0.425313	0.281362
1.0125	1.99719	1.13221	0.788832	2.30729	0.505573	1.91121	1.38906	2.1456	0.418114	0.697164	2.0326	5.58707	0.717663		1.0125	0.812244	1.31364	0.418401	1.66102	1.62706	0.916699	0.943639	2.2279	1.34426	1.4707	1.13717	1.34886	1.52603		1.0125	1.30166	0.566059	1.27858	0.838928	0.858491	0.665277	0.596797	0.959713	1.29809	1.34968	1.10368	0.325175	0.705895
1.01417	1.38757	1.04029	0.561435	1.79668	0.140517	1.35773	0.655317	2.00205	0.76643	0.721409	1.93237	1.66067	0.533367		1.01417	0.0871897	1.35123	0.352928	2.36637	2.12225	0.783238	0.469083	1.27815	1.1639	1.34931	1.26257	1.62782	1.05091		1.01417	1.02535	0.960328	2.29861	0.90897	0.0399507	0.921027	1.66631	0.636753	1.43206	1.33785	1.61931	1.08578	0.680636
1.01583	1.00604	0.946191	1.12351	1.59751	0.217289	1.93102	0.780851	1.4652	0.8854	1.04703	1.86718	8.52129	0.983521		1.01583	0.711966	0.627815	0.735565	1.8439	1.05168	0.817425	0.97561	2.36813	1.05756	1.67551	0.877287	1.59562	1.42157		1.01583	1.51303	1.12912	1.90591	1.30641	1.20329	0.648396	0.946577	0.930193	1.01294	1.29482	1.73878	0.543171	0.0443209
1.0175	1.69628	0.73567	0.987628	1.68028	0.930185	2.23028	0.717565	2.11616	1.33253	0.661094	2.67888	27.9088	0.540891		1.0175	0.862756	0.83759	0.416347	3.84429	1.02851	0.570762	0.838997	1.81229	1.51315	0.95213	0.757068	1.41788	1.76749		1.0175	0.873572	1.25892	1.58098	0.549711	1.03835	0.782371	1.98235	0.845148	1.0927	0.9996	1.96191	0.420373	0.443277
1.01917	1.60922	0.996512	1.02529	2.91769	0.187184	1.82081	1.7248	2.44123	0.640319	0.805007	2.1999	36.7641	0.813223		1.01917	0.834046	1.59327	0.894194	3.75527	0.798395	1.37598	0.488178	1.29363	1.57828	1.36822	1.4143	0.877716	1.4301		1.01917	0.696955	0.927562	0.87316	1.18624	1.60795	0.842703	1.27639	1.49051	1.06662	1.56856	1.2424	0.991495	1.48439
1.02083	0.70068	0.826634	1.29865	0.746746	1.51421	2.21491	1.46402	1.92255	0.69755	0.837778	1.80732	2.25461	0.969681		1.02083	0.866607	1.62137	1.75979	1.30644	0.916219	1.38048	1.21597	0.473073	2.01122	1.69208	0.968367	1.38939	1.15823		1.02083	0.953895	0.47923	1.61438	0.939626	0.45181	0.93081	0.685971	1.0241	1.11031	0.94835	1.09959	0.581083	1.36956
1.0225	1.1135	1.76167	0.215196	1.31687	0.903795	1.86827	0.788725	1.61942	0.544386	0.840198	2.33838	2.04538	0.954705		1.0225	0.697925	0.886041	1.42045	1.76261	1.02525	1.1748	1.21246	1.26663	1.25702	1.44085	1.21501	1.01501	0.949007		1.0225	0.410882	0.67241	2.17034	1.24325	0.267448	1.17909	0.855122	1.00556	0.885893	1.83908	1.77873	0.893032	1.33003
1.02417	1.22925	1.30083	1.10187	0.989545	0.362681	1.8409	1.54205	1.84698	-0.090646	0.707671	1.81033	1.18358	1.02147		1.02417	0.736824	1.00281	1.25409	0.682398	1.22699	1.48952	0.710319	1.25815	0.76586	0.564027	1.63684	1.26123	1.39151		1.02417	1.1099	0.981119	1.41943	0.683901	1.0503	0.68081	0.424819	0.792733	1.36329	1.17631	1.86659	1.02998	1.15895
1.02583	1.10377	1.03889	1.37684	1.09301	1.07525	1.52766	1.45435	2.35329	0.539377	0.760971	2.34934	1.04322	0.858461		1.02583	0.895943	1.20613	1.18113	1.66587	1.01963	1.09728	1.29766	1.29117	1.19615	0.991904	1.60479	1.02352	0.834028		1.02583	1.08744	1.13026	1.55269	1.08274	0.756657	1.26279	0.65408	0.89977	1.59667	0.859592	1.07357	0.825616	1.62209
1.0275	1.97688	0.692666	1.4556	1.63959	0.313311	1.58143	0.826872	1.54304	1.23293	0.711863	1.70383	1.03401	0.967246		1.0275	1.23908	1.40255	1.35102	0.59637	0.66704	1.63869	1.33449	0.621587	1.20111	1.39632	1.43914	1.42121	1.10536		1.0275	1.18271	1.0761	0.691576	0.985189	0.355683	0.792495	1.19605	1.34785	0.729954	0.994827	1.31914	1.21849	1.10652
1.02917	1.50833	1.06486	0.455479	1.31458	1.0911	1.42538	1.22853	1.74524	0.72629	0.622407	1.64592	0.998394	1.22873		1.02917	1.20332	1.2172	0.883705	1.61802	1.11777	1.57186	0.629969	2.55888	1.20388	0.978282	0.901198	1.6769	1.96714		1.02917	0.661542	1.24833	1.43838	1.69656	0.98139	0.816414	1.04535	1.27036	1.29765	0.733777	1.45359	1.30454	1.07491
1.03083	0.517328	1.52332	0.809166	1.20615	1.46923	1.5278	0.283592	1.51395	1.38892	0.733556	1.74179	0.671083	1.09885		1.03083	1.04228	1.39239	1.0889	0.972387	1.06056	0.575922	1.38539	1.60815	1.30689	0.547178	1.89314	1.60378	1.18698		1.03083	0.749559	0.9015	2.56348	1.09873	0.207432	1.37192	0.795939	1.74178	1.35481	1.40414	1.93148	0.513588	0.98439
1.0325	2.63793	1.21246	0.5959	1.58697	1.28355	2.01369	0.636661	1.09218	0.638036	0.633566	1.56079	0.935374	0.927584		1.0325	0.737152	0.922958	1.41335	1.14365	0.652472	1.06262	1.54311	1.71668	1.30158	2.15092	1.37747	0.93665	1.11125		1.0325	0.987411	0.925747	1.59231	1.26381	0.0497202	2.00209	1.00305	1.23542	1.93596	1.44821	1.25919	1.59785	0.524855
1.03417	0.967872	1.77864	0.893147	1.69743	1.14759	1.98681	1.78129	1.79668	0.215143	0.602735	1.7794	1.2053	0.785786		1.03417	0.653125	0.873283	1.053	2.50833	1.3247	0.742236	1.10338	2.02781	1.94953	1.05307	1.21466	1.97364	1.24234		1.03417	1.2765	1.38199	1.23359	0.908271	1.33151	0.96227	0.625065	0.933311	0.386413	0.805765	2.12434	0.76491	1.25235
1.03583	1.48911	1.7546	0.420455	1.82284	0.749627	2.13475	1.35774	1.21714	0.856474	0.471747	2.09056	1.22729	1.16749		1.03583	0.990675	1.29948	0.907833	0.628071	1.45259	0.884933	1.67845	1.65229	1.35063	1.31677	1.60221	1.86396	0.987042		1.03583	0.990012	1.58989	1.09192	1.45911	0.266033	1.36282	0.918005	0.801389	0.425689	1.31582	2.10508	1.77286	1.3275
1.0375	1.04309	1.63329	0.660556	1.67104	1.29439	1.59872	1.26281	2.0212	0.734459	1.04108	2.1719	0.677091	0.669456		1.0375	1.14318	1.12573	1.19979	0.134549	1.74811	1.30287	1.56617	1.46412	2.42985	1.48247	1.19806	1.23988	1.50066		1.0375	0.46162	1.091	0.812435	0.90717	0.398486	0.948337	1.15159	0.967437	1.26332	0.753253	1.8466	1.27104	1.99792
1.03917	0.825575	0.892913	0.308786	3.12409	0.522543	1.46766	0.925825	1.79898	0.711199	1.13845	1.21595	1.28764	1.2513		1.03917	0.643045	1.83812	1.1654	0.58404	0.787854	1.19546	1.28706	0.911923	1.48889	1.64567	1.91806	1.99983	1.51292		1.03917	0.753313	1.96275	2.25493	0.885717	0.379096	1.27328	1.20711	1.56655	1.56065	1.36104	1.81513	1.18765	1.20894
1.04083	1.45263	1.56433	1.32899	2.55537	0.885892	1.81242	1.22975	1.74112	0.452775	0.767826	2.2137	1.20835	0.800792		1.04083	0.937584	1.24523	1.09417	0.944361	1.10903	1.47724	1.42148	1.17335	1.01635	0.757168	1.54467	1.39305	1.14374		1.04083	1.30595	1.47196	1.47286	0.596152	0.694412	1.31616	0.80754	1.17412	1.15194	1.48435	1.29551	1.93687	0.98123
1.0425	2.54245	1.104	1.10166	1.53169	0.432146	2.06207	0.980319	1.53622	0.628325	0.828397	1.85092	1.84576	1.27692		1.0425	0.492084	1.48419	1.10428	1.78322	0.69872	1.04153	0.966433	0.194484	0.95912	0.473477	1.808	1.27288	1.23411		1.0425	2.25613	1.27869	1.85628	0.806008	0.371437	1.76976	1.92905	1.79177	0.933984	1.44652	1.29728	1.24888	1.15016
1.04417	1.15199	1.33383	0.76509	2.31121	0.719391	1.4635	0.461378	1.05649	1.11567	0.952362	1.81919	1.63089	1.21829		1.04417	1.19943	2.20399	0.74439	0.89593	1.43934	1.09389	1.3907	1.96527	1.33992	0.885799	1.74357	1.13483	0.462797		1.04417	0.940919	2.07347	1.98196	1.3501	0.475856	1.35106	0.719335	0.944267	1.49641	0.976319	1.30208	1.74076	1.31584
1.04583	1.3917	1.03855	0.801489	1.53381	1.01225	1.69016	1.12826	1.87769	1.01526	0.856522	2.01722	0.880946	1.52422		1.04583	1.03909	1.54585	1.8913	2.02682	0.914991	1.26757	1.37726	0.832513	1.86123	2.12173	1.44067	1.56271	1.58919		1.04583	1.21328	1.07138	1.26205	1.14837	0.96398	1.55377	1.36362	1.59107	1.59701	0.877254	1.31392	1.11047	0.616109
1.0475	1.36659	1.52591	1.22605	1.52718	1.24931	1.38963	2.04395	1.6362	0.728964	0.728287	1.34816	0.70412	0.504065		1.0475	0.817427	1.52766	1.32031	0.893541	0.981654	1.4057	1.50325	1.45461	1.45767	1.03188	0.90611	1.89042	1.20901		1.0475	0.904398	1.17277	1.00401	1.19298	1.38931	0.946615	1.02114	0.870208	1.31952	1.1734	2.30874	1.31415	1.22793
1.04917	1.08625	0.945879	1.10476	1.62436	0.739084	2.12857	1.44849	1.59463	1.43033	1.0068	1.74057	0.980685	1.26555		1.04917	1.26815	2.14863	1.15379	0.765793	1.51173	0.488352	1.51296	1.53443	1.69706	1.2614	1.37591	0.887673	1.97335		1.04917	1.00804	1.54395	2.39978	0.857133	1.31774	1.53163	1.82234	1.18565	1.40327	0.760116	2.479	2.11049	1.19106
1.05083	0.750985	0.969403	0.500729	1.5141	1.6629	1.54051	1.36108	2.19853	1.04409	0.838257	1.88387	0.906716	0.763488		1.05083	0.791038	2.27012	0.881931	1.08945	2.0562	1.80935	1.00636	1.00635	1.69355	1.70636	1.53494	1.38802	2.1402		1.05083	1.13019	1.56654	2.17111	0.949879	0.674055	1.11729	1.03766	1.39519	1.99727	0.915971	1.67736	1.69243	1.54996
1.0525	1.71128	1.18584	0.509271	1.60369	1.1566	1.60185	1.53901	1.89155	1.71929	1.27993	1.9648	1.05785	1.41722		1.0525	1.04333	1.50305	1.73096	0.774832	0.99524	1.26195	1.24939	0.974037	1.43709	1.24542	1.56979	1.65129	1.89606		1.0525	1.2288	1.32135	1.57567	1.22155	0.597199	1.59772	0.756555	1.2577	2.4284	1.09519	1.29398	1.74536	1.0875
1.05417	1.45868	1.5274	0.872945	1.23377	0.389966	1.96961	1.57647	1.89458	0.641861	0.585921	1.41801	0.895675	1.22325		1.05417	0.468583	1.67369	0.584491	1.37933	1.68067	0.680232	1.67874	1.70902	1.49357	1.70128	2.43902	2.16469	1.85921		1.05417	0.568567	1.5586	2.49231	0.59031	1.07632	1.17081	2.13363	1.43517	0.68331	1.44708	1.38853	1.64087	2.25696
1.05583	0.916076	0.673827	0.109239	1.51658	1.3695	1.40396	0.771387	2.07349	1.46773	1.01351	1.47219	1.1311	0.684477		1.05583	0.933018	1.97359	1.68641	1.52947	0.658328	1.41367	1.07103	1.74749	2.49345	2.27125	2.02983	1.16589	1.5716		1.05583	0.857803	2.37642	1.29508	0.988383	1.60335	1.30364	0.858977	1.28208	1.41739	1.23343	0.89676	2.01475	1.37266
1.0575	1.65519	1.46111	0.51797	1.64719	0.407507	2.05347	1.10018	1.88716	0.449605	1.15626	2.47763	1.34852	0.99932		1.0575	1.60457	2.07188	1.30062	2.03535	1.02739	1.73625	1.45367	0.972343	1.54579	1.70057	1.94833	1.00666	2.99627		1.0575	0.922846	1.34982	3.03226	0.971703	0.865426	1.07922	1.61029	1.50411	0.540799	0.876031	1.8317	2.86724	1.87296
1.05917	1.46888	1.32114	1.03019	2.63032	1.32791	1.82678	0.82392	2.15331	1.17856	1.01533	2.10878	1.12531	0.852388		1.05917	0.832895	1.61775	1.23659	0.860286	1.10548	0.908316	1.42899	1.62627	1.17346	0.5942	1.99203	1.37581	2.32057		1.05917	0.961682	1.65866	2.15912	1.59362	1.71489	1.58589	1.12747	1.03573	0.436281	1.43594	2.18619	2.26387	0.790728
1.06083	2.28601	1.40221	0.800334	1.60567	1.4413	1.51208	1.197	1.8823	1.66862	0.772845	2.00807	0.910155	1.32078		1.06083	1.73563	2.47478	0.723177	1.81285	1.6446	1.81905	1.01941	1.16047	1.18165	1.12706	2.58095	1.13145	1.99541		1.06083	0.640177	1.60651	2.20102	1.79086	1.13536	1.05759	0.912648	1.81163	1.11293	1.16697	2.25538	3.44544	0.642632
1.0625	1.67497	1.07717	1.54799	1.50409	0.632954	2.08136	0.888772	1.19994	0.67118	0.661212	1.68574	1.14359	0.945444		1.0625	1.05029	1.54087	1.40687	1.42041	1.34051	1.41357	1.60157	2.39603	1.85533	2.2375	3.02175	1.68817	2.70564		1.0625	0.805995	1.77293	1.79408	1.74207	1.64551	1.13176	1.81653	1.50102	1.65475	1.86367	1.49327	2.63642	1.90684
1.06417	2.35057	1.55312	0.597996	1.71177	1.45677	1.75098	1.62785	2.26838	0.825117	0.98268	1.94328	1.34333	1.23962		1.06417	1.19923	2.31371	1.50759	1.68665	2.25018	1.97698	1.52178	2.19048	1.75124	1.59585	2.18297	1.58983	3.08623		1.06417	0.851444	1.98933	2.95112	1.52445	0.946034	1.8925	1.65835	1.19446	1.33725	1.12026	1.4952	2.58427	1.86862
1.06583	2.21752	2.10411	0.282107	1.49086	1.00543	1.59379	1.1928	1.74494	0.92443	0.878945	2.04668	1.35364	1.47318		1.06583	0.728223	2.88787	1.16583	1.65313	1.4512	2.02115	1.34856	0.933447	1.48722	1.45838	3.30336	1.26211	2.29657		1.06583	0.767493	1.87658	2.71354	1.67865	1.13312	1.5766	1.96271	1.2256	0.811114	1.10261	1.22936	2.69971	2.01791
1.0675	1.96037	1.61127	0.634936	1.4866	1.50476	2.30343	1.9103	2.34273	1.3021	1.32607	2.49631	1.07298	1.17218		1.0675	0.691332	2.13994	1.50593	0.820954	1.52018	1.74076	0.912176	1.29363	0.924691	1.66732	2.1968	1.66445	2.75562		1.0675	0.767392	2.23406	1.9037	2.19049	1.1327	2.23962	1.55359	0.529778	1.36236	2.09318	1.43891	3.53365	1.04391
1.06917	1.48036	1.9915	1.11043	1.7301	1.01551	2.21207	0.997611	1.33243	0.938769	0.666958	1.90721	1.17959	1.11256		1.06917	0.897282	1.95753	1.58422	0.815477	1.80397	1.9415	1.4582	1.779	1.58924	1.76329	2.41859	1.42326	3.23909		1.06917	1.46379	2.94326	2.62383	1.54769	1.75719	2.59684	2.32093	1.18038	1.24276	1.00424	1.92484	3.0957	1.62885
1.07083	2.33075	1.76226	1.86607	1.37223	0.949403	1.9996	1.51008	1.94436	0.120681	0.800438	2.30112	1.02751	0.659448		1.07083	0.812633	1.92823	1.20425	2.12715	1.27495	1.51921	2.00204	1.71687	1.78111	1.17325	3.029	1.25714	2.26465		1.07083	1.01833	2.8206	2.64744	1.77844	2.23167	1.62078	2.15064	1.79942	1.26576	1.6615	1.88508	3.69491	0.388738
1.0725	3.29908	1.91404	0.156094	2.1835	0.810925	2.44841	1.85423	1.43607	0.0567977	1.46235	2.70523	0.817517	1.08414		1.0725	0.451099	2.7251	2.06289	1.46827	1.36497	2.5574	1.62033	0.872265	1.73343	1.71981	2.9905	1.83423	2.74946		1.0725	0.904241	2.88247	2.79844	1.86052	2.3758	1.34526	2.0598	1.67915	2.36519	2.07348	2.23069	3.5826	0.84589
1.07417	1.16533	1.5499	1.4618	1.46227	1.19834	2.14549	1.50221	2.05748	1.22703	1.0844	1.95893	1.07611	1.44013		1.07417	0.737207	2.93749	1.71366	2.04781	1.66396	2.36351	1.05317	1.55404	2.19146	1.46295	3.57205	1.60634	2.52378		1.07417	1.18386	2.18932	1.69372	2.18879	1.24557	2.04383	1.71257	1.71512	2.10634	1.18749	1.28219	3.31199	1.37657
1.07583	2.43053	1.917	1.56985	2.10748	0.531746	1.43511	0.631052	1.86655	0.782077	0.820967	1.79488	1.27207	1.25999		1.07583	1.26263	2.06958	1.63202	1.29208	1.93281	1.77099	1.13681	2.02038	1.79713	1.1595	3.03605	1.01829	3.29696		1.07583	1.61522	3.10032	3.35117	1.99995	2.38587	2.26603	1.87532	1.51949	1.90783	1.65131	1.86421	5.3437	1.28964
1.0775	2.26918	1.57509	1.28501	1.43951	1.22929	2.07944	2.08109	1.62044	0.438575	1.25937	2.90192	0.918078	1.21086		1.0775	1.62573	2.79922	1.76545	1.62319	1.46391	1.72271	1.6732	1.85599	1.79969	2.42593	3.94452	0.904682	2.68442		1.0775	1.43488	3.38212	3.08261	2.08846	1.52293	1.98842	2.56813	1.52968	1.9656	1.28282	1.43976	3.13134	1.56227
1.07917	2.14134	1.50047	0.263606	2.17982	0.966647	1.9458	1.3326	2.48302	0.494513	0.950413	2.08629	1.23242	0.995314		1.07917	0.928505	2.6745	1.76272	1.91891	1.98517	1.44977	1.13461	1.82913	2.07743	1.7517	3.79619	1.49229	3.67889		1.07917	1.30321	4.01005	3.96568	2.31245	2.245	2.13728	2.68013	1.4595	2.47956	1.89406	1.23329	4.4536	1.19303
1.08083	1.87147	1.6592	0.680489	2.64987	0.385962	2.33157	1.2434	1.99457	0.210448	0.898895	1.80339	0.445117	1.51595		1.08083	0.799015	2.71694	1.61732	1.87926	2.17787	1.63957	2.27852	1.79103	1.33786	1.67941	3.28304	1.26455	2.2234		1.08083	0.663085	4.36469	3.35366	1.59597	2.18742	2.14526	2.63427	1.56919	1.55776	1.42251	1.73213	3.74188	0.347441
1.0825	2.08989	1.32634	0.497428	2.66812	0.596969	2.08484	1.05322	2.11837	1.57929	0.644772	2.33448	1.19923	1.35295		1.0825	1.19251	2.18079	1.78575	2.09774	3.11414	2.58485	1.64951	2.18485	1.90394	1.75774	2.6164	1.62164	3.18458		1.0825	0.443403	3.73118	3.54113	1.93708	2.31063	3.28193	2.64184	1.88361	2.556	1.64698	1.51615	3.6925	1.21608
1.08417	2.1968	1.76837	1.23106	2.00893	1.67205	1.83365	1.78219	2.37856	0.886907	1.02448	2.90045	0.752995	0.889506		1.08417	1.11753	2.80349	1.80692	1.97011	2.37159	3.64439	1.68863	1.61712	2.14286	1.97074	3.16933	1.15954	2.94836		1.08417	1.1244	3.95692	3.36778	3.38616	3.59557	2.36723	2.7619	1.70828	2.10995	1.59986	2.84825	3.53689	1.17921
1.08583	2.66935	1.86862	0.686085	2.19557	0.826166	1.57952	1.6126	2.16153	-0.00429392	0.908866	3.40524	1.23596	1.01916		1.08583	0.589151	3.24598	1.53606	2.79253	2.2523	1.66474	1.77997	1.67356	2.25729	1.90554	4.05954	2.40968	3.22101		1.08583	0.64575	4.50587	3.07175	1.69185	3.53093	2.90929	2.56373	1.09874	1.73568	1.53149	1.29437	3.607	1.22747
1.0875	2.04531	1.00243	1.14444	2.15437	0.890915	2.45477	1.43628	2.19794	1.08956	0.860215	3.54263	0.590577	0.549218		1.0875	0.924447	3.81047	1.56934	3.46355	2.64628	2.76187	1.41312	2.81156	2.4711	0.807083	4.06251	1.76323	4.08013		1.0875	0.781844	3.61744	4.16863	2.75193	2.79437	3.07457	3.31495	1.27639	1.91639	1.42983	1.9535	5.51224	0.914708
1.08917	2.80025	1.99781	1.7539	2.05792	0.720624	2.09767	1.79151	2.63097	0.57196	1.09067	3.10281	1.02408	1.12531		1.08917	0.752268	2.97373	1.61583	2.38058	2.59773	2.01211	1.38116	1.48346	1.49166	2.20733	3.00531	0.553499	3.96006		1.08917	1.4252	4.38954	5.44705	3.51147	2.2661	3.16539	4.07582	2.07008	2.50793	1.4624	1.52792	5.12354	1.30892
1.09083	1.52388	2.42943	1.26965	2.60055	0.988491	1.59993	1.67836	1.9498	0.405968	0.642567	2.38027	1.04366	0.69862		1.09083	0.872025	3.26256	2.36967	2.88288	3.39705	1.48253	1.29038	2.31503	2.332	1.58162	5.0145	1.12486	4.23316		1.09083	1.15977	4.24908	4.59116	2.99663	2.55497	3.0632	3.23356	0.810408	2.04246	1.74497	2.32013	5.52234	1.92424
1.0925	3.22772	2.16566	1.56085	2.15799	1.14687	1.65037	1.35001	1.58873	0.665999	0.994819	3.12355	0.599456	0.951125		1.0925	1.43434	3.63946	2.59293	3.94463	2.33372	2.43079	1.70035	2.12278	1.64522	1.54086	4.61863	1.67101	3.55502		1.0925	0.667899	4.7487	3.64212	3.71815	2.88019	3.02768	3.62443	1.41903	2.47719	1.63916	1.96767	6.63712	2.28933
1.09417	3.24809	2.68102	0.750206	1.87793	1.65247	2.10909	1.69502	2.26436	1.15992	1.03882	3.75651	1.10952	1.45726		1.09417	0.401963	4.38962	2.12455	3.9949	2.13251	2.20374	2.29586	1.84436	2.16232	3.05432	5.73655	1.3013	3.2198		1.09417	0.79096	3.68156	4.42311	3.52127	2.71609	3.26482	3.15693	2.28927	3.30606	2.07592	1.86948	5.68478	0.619951
1.09583	3.06633	1.80969	0.88957	2.73224	2.17182	2.92313	1.57371	1.66574	1.10044	0.768783	3.18635	0.551982	1.09893		1.09583	0.645161	3.59917	2.1262	2.98206	2.70622	2.62859	1.42199	2.69737	1.82536	2.39338	5.80876	1.2349	3.54322		1.09583	0.607191	5.22316	3.16135	2.72979	2.96706	2.23158	2.31444	2.16888	3.35389	1.46963	1.6514	5.71367	1.27611
1.0975	4.28427	2.59508	1.31052	3.09784	1.88341	2.65005	1.59035	1.93943	0.91523	0.967932	4.06012	1.17277	1.35395		1.0975	0.811279	3.04189	1.60189	2.20725	2.75991	2.97808	1.40522	3.26276	2.92559	1.92787	5.41355	1.45165	5.57676		1.0975	1.02923	5.03762	4.19301	2.81234	3.08726	3.06703	3.50298	1.29751	2.4951	1.61625	1.63576	5.0954	0.934741
1.09917	3.82436	1.88036	0.594659	3.2267	1.64203	2.41353	1.88676	2.44075	0.477412	1.0883	3.40164	0.841432	1.16604		1.09917	1.30306	4.30476	1.38942	3.01891	2.97816	2.39489	1.75518	2.17563	2.36512	1.64315	5.04963	1.34592	5.04747		1.09917	1.22278	4.7011	4.4774	2.8573	3.70764	4.42303	2.55735	1.94655	3.15896	1.74401	1.35102	6.20859	2.03677
1.10083	3.06646	2.13305	1.08226	2.03885	1.54981	2.58735	1.05237	2.71809	0.691129	1.08021	3.81346	0.872433	1.22827		1.10083	1.31406	5.2379	2.1835	4.62224	2.78765	3.73085	1.42444	2.64789	3.14094	1.49951	4.41429	2.14341	5.15368		1.10083	1.44172	5.00144	6.01238	2.55772	4.16089	3.06702	3.53835	3.1808	2.55559	1.93401	1.07294	7.12584	2.2789
1.1025	4.13397	2.58226	1.45497	3.12534	2.71583	2.54852	1.72789	2.44575	0.501787	1.31239	3.66043	1.13415	1.0728		1.1025	1.12677	4.03841	2.20245	2.69521	2.44137	2.98321	1.78081	2.53967	2.64986	2.02069	5.26431	1.03184	4.87805		1.1025	0.948378	5.91949	4.96012	3.06828	4.47247	4.50751	3.62759	1.81834	3.7662	1.61265	2.49231	6.54737	1.97672
1.10417	3.38971	2.881	2.25266	2.76463	2.75775	2.12977	1.74535	1.6855	0.780612	0.696037	2.54204	1.5952	0.610874		1.10417	0.594467	5.33223	2.4587	4.06887	3.01879	3.45688	1.67008	2.31863	3.07633	2.05724	5.33892	1.23923	5.28596		1.10417	1.10125	5.08298	4.61297	3.21191	3.80888	2.92992	3.97296	1.46208	3.25878	1.81972	1.75705	6.304	1.18509
1.10583	3.92437	3.07213	0.995439	2.35299	1.25965	2.28475	1.6744	2.15232	0.769074	0.644196	4.14929	0.818571	1.1145		1.10583	0.754566	3.95143	2.35569	5.42473	2.94049	2.27989	1.49653	2.84026	2.18015	1.18119	6.32297	0.758864	6.76141		1.10583	1.23563	5.14837	6.67012	4.37397	5.91437	4.32091	3.9896	2.50113	3.56052	2.59923	1.41131	8.024	0.310215
1.1075	3.91773	2.52761	1.59005	3.7123	2.05703	1.96157	1.91714	1.97117	0.417848	0.75815	3.30842	0.981183	0.727568		1.1075	0.604804	5.26622	1.83701	4.03626	2.99696	2.21832	1.40133	3.17032	1.74965	1.10029	6.63813	1.62555	5.6084		1.1075	0.998434	5.83848	6.02256	2.94843	4.14899	4.16151	5.73903	2.00504	4.12641	2.11506	1.74934	7.38232	1.51862
1.10917	3.78614	2.28922	1.45214	2.64626	2.10015	2.30776	1.56774	1.72325	1.03446	1.04056	4.07223	1.66593	1.04956		1.10917	0.995843	4.16022	2.32173	2.70378	2.42529	3.3542	2.01613	3.29203	2.34965	1.67575	5.8928	2.04846	5.67057		1.10917	0.6489	6.2711	5.58873	3.60934	5.91288	4.56034	5.20419	2.58738	3.39064	1.85336	1.5498	6.42079	0.817798
1.11083	4.65827	2.16409	1.43536	3.31784	1.38468	2.49269	2.16021	2.62273	0.810107	0.727182	4.76488	1.1367	0.3589		1.11083	1.92695	4.13916	2.58956	5.54375	4.28512	3.88748	2.52621	3.03286	3.59148	2.6339	5.70411	2.12527	5.64039		1.11083	1.19852	7.85563	5.89013	3.46695	5.56094	5.56352	4.37174	2.35284	3.83737	1.94646	1.54192	9.01545	1.50362
1.1125	3.31387	3.07115	1.69197	3.33283	2.37697	2.22254	1.32902	1.87958	0.278482	1.3846	3.96694	1.41446	1.2617		1.1125	0.737323	5.05131	2.42861	3.70176	3.84182	3.73644	1.70061	2.64923	2.36376	2.20336	7.32877	1.25289	5.55876		1.1125	1.12919	6.30669	6.24923	4.53494	4.38897	4.46533	4.4696	2.34027	2.81009	2.42497	2.30947	7.58479	1.03345
1.11417	4.39591	3.14498	1.19522	3.48817	1.70191	2.69243	1.54081	2.98729	0.99498	0.773411	4.47972	1.7732	1.33517		1.11417	0.872768	4.79948	2.26599	3.97293	3.04536	3.86889	1.46784	2.43686	3.44394	2.33455	5.02714	1.00163	6.66053		1.11417	1.14015	7.57981	6.22956	4.8725	5.08011	5.03391	4.08173	2.27076	4.17649	2.96771	1.87311	8.43743	1.147
1.11583	4.0735	2.38242	1.56322	3.35373	2.62536	2.87826	1.86114	2.30771	1.41014	0.90574	5.685	1.4701	0.615228		1.11583	0.727849	3.66509	3.41985	3.16992	2.88449	3.95846	1.9728	3.99743	3.27581	3.36056	4.65178	1.95692	7.0999		1.11583	0.931058	7.10586	5.95171	3.71311	5.1218	4.43282	5.71678	2.14192	5.44049	2.13455	2.04104	8.39793	1.38121
1.1175	4.36821	3.29333	1.41804	3.63199	1.76453	3.24756	1.8932	2.81844	0.8308	1.1875	5.09831	0.535722	0.913639		1.1175	1.60492	6.29522	2.43813	5.16967	4.65842	4.76125	2.01147	3.63752	3.57617	3.59171	6.60316	1.19643	6.89382		1.1175	0.575514	6.55745	7.9747	3.93403	6.19746	4.10638	4.9169	1.86008	4.55981	2.65276	1.99402	8.56801	0.800551
1.11917	3.74848	3.10004	0.918582	4.24331	2.76991	3.95055	0.976976	2.66672	0.786902	0.982969	4.90104	0.645619	0.723439		1.11917	0.755461	5.67343	2.96495	5.2729	3.39803	3.9437	2.47816	3.83351	3.19767	3.07301	8.19245	1.65596	6.00118		1.11917	0.653361	7.76191	7.60511	4.49915	5.55206	5.4087	5.18086	2.13537	4.94202	1.79283	1.88974	8.94413	1.33839
1.12083	5.57099	3.27332	2.09679	4.68192	1.90143	3.46138	1.76008	1.91482	1.07577	0.745805	5.39942	0.795812	1.08029		1.12083	0.943194	5.27472	2.84566	5.10454	4.74152	4.62484	2.5527	4.69861	2.65291	4.0213	7.94222	1.38974	6.34874		1.12083	0.888542	6.68904	7.16701	4.67933	5.69939	5.30754	6.1553	2.2264	5.12944	2.10961	2.28239	8.19618	1.42177
1.1225	4.62231	3.32157	1.56936	3.30422	1.6653	3.4237	1.80899	2.1953	1.22165	0.796162	5.41625	0.921837	1.00573		1.1225	1.3652	5.50861	3.83531	4.50233	4.1794	4.27596	1.89306	3.73833	3.38867	2.31581	7.51994	1.49472	5.54845		1.1225	0.830194	6.98974	7.76026	4.914	6.29655	5.26635	6.26355	2.117	3.94837	3.60461	2.25012	8.5815	1.27318
1.12417	5.2807	3.84025	1.6165	3.45553	2.23932	3.0138	1.42467	3.20297	2.51677	0.649909	5.66221	0.59634	1.37954		1.12417	1.02628	5.80706	4.65383	5.34151	4.23338	4.48108	2.62445	2.85791	3.63214	2.05585	7.70294	1.35294	8.72906		1.12417	1.08552	6.92395	8.64338	5.57602	6.07624	4.35662	6.62132	3.2599	2.85279	2.31308	1.5452	9.45981	1.12612
1.12583	4.84119	3.99952	1.50686	3.42421	3.4461	3.48004	2.15621	2.86253	1.38466	0.514785	5.47479	0.734045	1.72407		1.12583	1.05217	5.75164	3.01996	5.14478	3.85917	4.43072	2.94198	4.21504	2.71185	2.58044	10.5023	1.52747	7.06171		1.12583	1.45678	8.93615	7.91739	4.87311	6.66041	4.76418	6.22566	2.73345	3.86837	3.32291	2.0648	10.8039	0.903238
1.1275	5.80651	3.96298	2.00204	4.25713	1.97901	3.62595	2.06465	3.41991	1.49377	1.12862	5.49939	1.00826	1.35372		1.1275	0.725612	5.43337	3.02703	4.81875	4.54467	4.46231	3.09872	4.03155	3.34836	2.05214	8.54135	0.888431	8.75336		1.1275	0.803457	7.58075	7.96619	5.87712	6.51236	6.15519	7.29435	3.04357	4.50038	3.336	1.63285	9.71906	2.11615
1.12917	5.65335	4.19451	1.23819	3.14857	2.1118	3.38603	2.24224	3.5843	1.56063	0.714076	5.96231	0.679189	0.679564		1.12917	0.58245	7.10953	3.82724	5.32284	4.52309	3.99326	2.39154	5.41364	3.00288	2.59516	8.33861	1.50616	8.89199		1.12917	0.611234	7.77861	8.3603	6.37463	5.8038	5.51904	7.16206	3.00888	4.8884	3.21289	2.54062	8.88161	0.439885
1.13083	5.78809	3.17291	1.61583	3.36434	2.65321	4.04032	1.58224	2.80169	0.692861	0.640191	5.13568	1.11619	0.969482		1.13083	1.01156	6.50748	3.59336	5.90212	4.55091	3.83933	2.46444	5.78518	3.80503	2.9541	8.91567	1.51638	7.95495		1.13083	1.47979	6.67889	8.57932	6.16885	7.45988	5.80561	7.12846	3.87736	4.8175	2.9628	2.57409	9.96261	1.21787
1.1325	2.94136	4.4521	1.84919	4.68665	2.69777	4.62049	2.65114	3.06889	1.29645	0.887092	6.32563	1.20909	0.985559		1.1325	1.21938	6.12864	3.08841	5.61122	4.90362	4.71591	2.80604	5.91612	3.36014	3.00366	7.33141	0.700272	8.58985		1.1325	1.23542	9.43499	7.81029	5.57226	7.58374	6.53827	5.70639	3.17288	5.62786	2.50153	1.96147	10.4385	1.26738
1.13417	4.78937	4.84948	2.24655	5.05343	3.63998	3.61091	2.51357	3.48366	1.23388	0.778019	7.05533	1.17556	2.2059		1.13417	0.422777	6.77665	3.75374	5.48298	5.63942	5.77893	3.10876	3.61512	3.15417	1.36762	9.53094	1.86998	7.95682		1.13417	1.77544	8.33577	8.74558	6.59701	6.27959	6.25106	6.68337	2.46362	5.88803	2.95392	2.00218	9.97312	1.16479
1.13583	7.06705	4.41173	1.951	4.20853	3.0752	4.23415	2.61816	2.74139	1.10053	1.13293	6.24899	1.4812	0.610655		1.13583	0.823081	6.1583	3.23405	7.60138	4.23028	4.61253	2.19738	5.17599	3.54701	2.74652	9.33992	1.54836	8.77118		1.13583	0.661726	7.83505	9.13528	5.62986	7.89512	5.58152	7.44109	3.29038	4.67887	2.76032	2.89474	10.9524	0.70068
1.1375	6.19544	3.29336	1.9389	4.16983	2.94303	3.73088	2.72459	3.49015	1.38424	0.930213	5.27998	1.11933	0.853297		1.1375	0.709098	7.78047	3.82098	7	5.79266	5.00987	2.5225	4.67771	3.98947	2.39577	10.2756	1.3533	9.73633		1.1375	0.951845	8.64195	9.06426	5.15171	8.80155	5.49392	8.48606	3.22158	7.09806	2.91892	1.92487	11.4295	1.01014
1.13917	4.98642	4.78322	2.67168	4.29546	3.04419	3.56552	2.28722	3.7002	2.54953	0.719683	6.0827	0.715247	0.601535		1.13917	1.04685	6.73754	4.75139	5.71342	5.44626	5.417	2.51372	5.63144	3.8447	2.75491	9.55961	1.7252	9.69995		1.13917	0.781759	9.22263	8.42513	6.49575	8.14694	6.66794	8.195	3.5461	6.51913	3.5138	1.88176	10.5219	1.34127
1.14083	4.98187	4.22996	1.65829	4.91073	4.12517	3.30822	1.38693	2.78784	1.6709	0.820673	5.96918	1.8038	1.23163		1.14083	1.06194	6.89767	3.42546	7.45343	6.0813	5.42178	2.5886	5.67	4.10682	2.52886	10.1524	2.03648	8.24256		1.14083	0.933038	9.01074	9.6143	5.57408	7.72773	6.87314	7.84049	2.83113	6.47664	2.7817	2.16393	9.29493	0.864264
1.1425	8.48473	4.71174	2.0588	4.57012	2.49371	4.50432	1.75527	4.15234	1.62151	0.685504	7.41777	0.508722	1.46089		1.1425	0.747043	7.97952	5.46496	6.62423	4.84319	6.60464	2.29976	4.36517	3.93461	2.32728	9.69066	1.31088	9.46188		1.1425	1.39034	11.3452	8.42682	6.92675	8.44789	6.77988	8.01478	4.46218	5.33536	3.84917	1.6963	12.4243	1.21534
1.14417	6.78643	5.41534	1.9446	6.2504	2.77691	3.6752	0.967107	3.67503	1.26315	0.798336	6.01501	0.752041	1.03909		1.14417	1.10157	8.52193	4.06904	5.42327	6.04489	7.3553	2.98458	4.75712	3.8522	2.12634	10.2329	0.951649	9.26079		1.14417	1.49786	8.49579	10.1389	7.02826	9.19428	5.81067	7.7803	3.92847	6.83438	3.05129	2.06296	12.6116	1.12571
1.14583	6.80476	4.61232	2.57311	5.91627	3.25238	4.97044	1.97527	3.02077	2.2538	1.19432	6.43201	0.443725	0.647885		1.14583	1.0423	6.93071	4.72401	8.53751	5.94442	4.3774	2.5044	5.53352	4.1066	3.49069	9.17823	1.09013	8.64856		1.14583	0.952175	12.5728	9.25346	7.27442	8.18401	7.62314	6.88095	3.50029	7.07534	2.99057	1.60373	11.1868	1.40122
1.1475	7.79319	3.59838	2.12986	6.0658	3.22285	4.84633	2.53546	3.6174	1.88582	1.27794	6.82077	0.922343	1.2609		1.1475	1.12493	6.45534	5.37043	6.8627	6.41928	5.87761	2.54298	7.43026	3.86353	2.19756	9.86038	0.976655	10.1669		1.1475	0.735979	10.7269	10.6377	7.14975	9.34093	7.70245	7.74873	3.89683	7.30783	2.96545	2.07854	10.6615	1.77624
1.14917	7.3845	5.3052	1.69223	5.28712	2.84013	5.13523	1.90607	3.38997	1.23879	1.08168	6.36525	1.27414	1.1653		1.14917	1.17499	8.24162	5.02263	8.5254	5.8002	4.71705	2.8451	6.02654	4.51083	3.14376	10.5541	1.08174	9.618		1.14917	2.27487	11.6355	10.2156	5.15947	10.3704	7.20123	7.35073	3.85332	7.2813	4.07476	2.36773	10.3018	0.530041
1.15083	6.38723	5.35722	2.13466	4.36047	4.68945	4.40996	2.3695	4.50293	2.36287	1.1016	8.11743	0.897646	1.05487		1.15083	0.819389	8.19456	4.75039	7.24259	6.83789	6.66901	3.56124	5.75588	4.42674	4.15497	10.6388	2.00501	10.8505		1.15083	0.990558	8.37468	10.9915	6.46758	8.13173	6.66511	8.11652	3.62657	5.9134	3.84659	2.05955	10.8491	1.08347
1.1525	6.90077	4.25758	1.97119	4.99136	3.74346	5.57432	2.01899	4.35482	1.40709	1.1024	8.06583	1.0715	0.904196		1.1525	0.986777	9.57643	5.33072	8.76004	7.35864	6.76022	4.6278	7.1852	4.21868	2.75948	10.5718	1.21491	10.9693		1.1525	1.53216	11.1669	11.2396	7.49697	9.85635	6.90461	7.85466	4.27476	7.81565	4.09316	2.83672	11.5597	1.34574
1.15417	8.70874	5.66721	3.36094	5.1391	4.05132	3.80937	2.50213	3.6802	1.19046	1.58422	8.00131	1.10564	1.42266		1.15417	0.756724	7.4291	5.07932	7.53407	6.98475	6.19409	2.49133	6.78569	5.30367	3.65924	10.6042	0.895934	11.719		1.15417	1.15702	10.7817	11.4462	7.55171	8.50525	8.8659	7.99844	3.37993	8.04785	5.02671	2.53044	9.63569	1.26215
1.15583	6.50634	5.05165	2.28047	5.70583	3.34406	4.95356	1.8929	3.66901	2.27172	1.23106	8.34268	0.892817	1.43027		1.15583	0.807211	8.97308	5.10035	8.39155	6.47838	7.34667	4.21829	5.86804	4.64789	3.34041	13.0915	1.60715	10.2875		1.15583	1.18226	11.4589	11.4305	7.84585	10.0294	6.03102	10.6264	4.89147	7.97778	4.2437	2.60652	11.6418	1.78654
1.1575	7.92199	7.10487	1.96704	6.79001	4.99883	4.35055	2.17578	4.26821	1.96627	1.19111	7.46589	0.820435	0.724144		1.1575	0.773063	9.64406	5.5855	8.51261	7.30034	7.30616	4.05805	7.10438	4.02458	2.6712	11.3813	1.31163	10.542		1.1575	0.959873	10.7841	12.5498	7.74226	10.0686	8.52041	8.93227	4.4473	7.65608	4.93235	2.38313	13.8185	1.47704
1.15917	7.56973	7.48283	2.30739	5.76694	5.07685	4.36007	2.11139	3.77366	0.912006	1.07235	6.38744	1.27557	0.892497		1.15917	0.827598	8.30951	5.442	7.58942	6.66036	6.48782	3.99648	7.98382	4.02925	3.04554	11.5143	1.72508	10.6054		1.15917	1.44721	10.3853	11.2381	6.54065	9.55801	9.02354	9.69191	4.78559	8.075	3.98636	2.30627	12.9039	0.919344
1.16083	7.92423	7.58735	2.62623	6.02499	2.75949	5.25894	2.34963	4.43358	2.30652	1.02312	6.95585	0.968672	0.831583		1.16083	0.601594	10.2315	5.6826	8.56787	6.69276	7.12055	3.58392	8.28282	5.48611	3.16541	11.8035	2.02421	12.2571		1.16083	0.8638	12.9214	12.4536	7.80046	10.1398	9.39745	9.08808	5.33229	7.74476	5.21462	3.28109	15.6694	1.45603
1.1625	6.85223	5.62119	1.92505	5.88573	4.08197	5.2909	2.12246	5.12627	1.79891	1.3531	9.00735	1.39752	1.39939		1.1625	0.658733	10.5219	6.2319	7.72963	5.9325	7.58021	4.25152	7.4203	5.51369	4.20325	12.0962	1.51799	11.4749		1.1625	0.472356	12.0242	10.8751	6.32299	10.614	7.68646	10.2484	4.26152	7.95503	4.58483	2.91906	13.4209	1.20583
1.16417	7.08869	5.87922	3.9299	6.3233	4.25478	5.70447	2.14286	4.57594	2.26602	0.874037	8.09527	0.687346	1.32586		1.16417	0.920366	9.32384	5.68292	8.78584	7.03199	7.40959	4.15228	7.33477	5.47274	2.46856	11.378	0.964924	10.473		1.16417	0.50288	11.6112	12.309	8.84921	8.99978	9.46584	10.7328	5.19079	9.01252	4.6531	3.57256	11.5934	1.31002
1.16583	7.37463	5.36083	3.24477	5.74738	4.25623	5.79692	3.39373	6.31271	1.34526	0.749625	7.94971	1.22346	0.726309		1.16583	1.32787	8.96805	6.39965	9.50367	8.04223	7.42082	3.56082	6.87057	5.12129	3.48192	12.0389	0.800444	12.0333		1.16583	0.951475	11.5149	12.8643	8.80306	10.4676	8.56488	10.0868	3.83697	8.59735	4.90773	2.98501	12.5837	1.89702
1.1675	6.86661	5.50721	2.80521	5.96158	3.9852	5.94632	1.53143	5.80867	1.96241	1.17094	8.24268	0.823045	0.569512		1.1675	1.14101	10.0807	5.63788	9.832	8.48097	7.91166	4.41413	8.05015	5.72442	4.06512	11.5194	2.29812	10.5743		1.1675	1.19803	12.7876	13.405	8.5973	11.3116	8.33814	9.80844	5.47266	7.89496	4.85395	2.47903	13.6097	1.27024
1.16917	7.61407	7.40927	2.4974	5.79322	2.25072	5.9542	2.29015	5.02502	2.03533	1.15009	9.16643	1.15893	0.853811		1.16917	0.683	9.18522	7.47361	10.0586	6.49766	7.75424	4.52218	7.91217	5.44584	2.42814	13.4481	1.6865	12.1904		1.16917	1.16249	13.2518	12.3362	7.30777	12.3315	9.33199	11.6577	6.40411	9.22694	5.98007	2.30844	12.9893	0.809877
1.17083	8.40988	6.24114	3.97126	7.05131	3.92293	5.68658	2.59331	6.02117	2.36584	1.31905	8.49812	1.65942	1.55713		1.17083	1.03479	10.9335	6.13856	9.77089	6.4254	7.66559	4.28123	8.80253	6.78805	3.52529	14.346	1.61242	11.3793		1.17083	0.544316	11.4957	11.9774	8.07545	13.0672	10.0633	10.3524	5.1263	10.5398	5.5261	2.58296	14.6922	1.26008
1.1725	8.50656	6.69502	4.11322	4.9325	4.19641	4.95452	3.48763	5.36684	2.29892	1.19163	9.61227	1.29331	1.39828		1.1725	0.603069	9.85582	5.6608	9.193	8.30075	6.75914	3.94689	8.06484	5.85883	3.72078	12.2664	0.980073	12.6932		1.1725	0.591496	11.5986	13.1411	9.48875	10.9798	9.64002	10.4275	4.48017	9.21554	5.90141	3.14892	13.5442	0.859875
1.17417	7.23412	4.77297	2.67249	7.31066	5.08525	4.96803	2.70102	5.58043	3.79637	1.49116	8.1259	1.72636	1.33121		1.17417	1.08247	8.20008	6.62475	9.51231	8.11264	8.29041	3.92074	7.59797	5.79278	4.91534	13.8444	0.904483	12.5453		1.17417	0.600656	12.6571	12.526	11.5071	12.5479	8.67116	7.91254	5.30588	9.24676	5.93973	4.54706	14.7867	1.21344
1.17583	9.42263	6.54974	3.34735	7.52026	3.88147	5.76231	3.37559	4.24083	1.50692	1.26015	8.90777	1.37845	0.571973		1.17583	1.71218	10.2624	6.6582	10.3944	8.06452	8.67578	3.83199	6.6645	6.4238	3.54644	13.3252	1.71204	12.5744		1.17583	0.764632	13.1148	13.2838	9.45766	11.4778	12.2606	8.50098	4.8596	10.1584	5.76169	3.14852	17.0407	0.477171
1.1775	8.21507	6.83281	5.10788	6.6176	5.14508	6.24803	2.93948	5.60853	2.50142	1.86881	9.23147	0.876602	1.39975		1.1775	1.30162	11.942	7.42768	9.65288	8.73036	8.53739	3.42373	8.9064	6.39544	4.36747	12.3775	1.2863	15.5982		1.1775	0.645923	13.3809	14.5287	9.71039	12.72	10.5013	10.1756	6.53795	9.64113	5.16762	2.32319	13.8088	1.14871
1.17917	9.42312	5.57432	3.81912	7.73686	5.31496	7.23686	3.28968	5.95276	3.78104	1.14776	10.5635	1.04593	1.31053		1.17917	1.06475	11.0042	6.70381	11.9196	8.34287	8.42805	4.14632	9.43028	4.99119	2.60322	13.1895	1.89873	12.9468		1.17917	1.10175	12.987	14.2946	10.424	13.7551	9.3842	10.3684	6.12551	11.0285	6.84742	3.24726	13.8231	1.19713
1.18083	9.77309	7.49256	2.57127	8.70414	6.28461	6.99316	3.63596	5.67108	3.06504	1.28679	9.81884	1.366	1.35013		1.18083	1.09855	11.5711	7.27953	12.3215	10.7453	8.10098	5.46741	9.32958	5.91107	5.56125	14.1119	1.32328	14.4418		1.18083	0.552753	15.1502	14.8894	9.14496	13.4649	9.73805	11.3184	5.35072	10.4307	6.79547	2.81164	13.4214	1.22901
1.1825	10.1528	7.01592	4.10719	7.98399	4.7971	6.86447	3.0893	5.17426	2.47852	2.04077	9.11423	1.33935	0.915049		1.1825	1.21743	10.8595	7.023	11.5217	9.0532	10.0145	4.88703	8.58542	6.15417	4.59024	13.7276	1.6362	13.2519		1.1825	0.384816	14.8298	14.1531	9.83377	14.8162	10.0739	11.7942	6.89742	9.08156	6.17047	3.31038	16.5271	0.655269
1.18417	8.04007	8.62051	3.41948	9.26443	3.93709	6.6807	3.62284	6.107	2.63434	1.0801	10.0045	0.731718	0.535355		1.18417	0.690481	12.5076	6.82774	10.6545	9.712	9.7421	5.1128	10.2179	4.61225	4.65409	15.7118	1.29918	13.848		1.18417	0.966685	13.9933	14.2116	10.6869	11.8398	10.7474	11.4914	5.5063	12.0486	6.32422	2.43565	15.466	1.25357
1.18583	8.98647	8.04588	4.07778	8.6175	4.2093	7.24518	3.33875	5.40045	3.03695	1.69134	9.90159	0.6664	0.663102		1.18583	0.652228	11.8571	8.62543	12.5288	9.3824	10.6812	5.22722	10.4601	5.06847	3.818	14.6459	1.49941	14.1256		1.18583	0.587851	14.3183	15.0199	8.53566	13.0536	10.0312	12.0963	6.24309	11.1634	6.99531	3.02686	16.3786	0.573832
1.1875	12.1929	7.01401	4.83182	6.60038	6.39213	7.56748	3.58396	6.14835	3.26883	1.54073	9.80534	1.15187	1.43466		1.1875	1.68093	12.9709	6.98321	10.113	9.62139	9.65278	5.80078	10.0414	6.9845	3.78759	14.207	1.12238	14.2405		1.1875	1.39979	14.308	15.2975	9.54055	13.365	10.6591	12.704	6.11833	11.3271	6.85496	3.6588	16.2132	1.4795
1.18917	8.89632	8.00148	4.59763	8.27206	6.03136	5.88676	3.12457	5.49451	3.65166	1.54196	9.73068	1.15466	0.663776		1.18917	0.992751	11.3321	8.94724	10.8195	9.83158	9.76056	5.4283	8.70446	6.18897	4.59123	15.406	0.842978	14.2125		1.18917	0.55765	15.6623	14.8174	10.437	15.3813	11.7737	13.4319	5.91754	12.0894	6.39693	3.49527	15.1361	0.636556
1.19083	9.45969	8.67624	4.74306	7.35677	7.24427	7.59263	3.46943	6.74394	3.35823	0.979677	9.44901	0.813473	1.32098		1.19083	1.75876	12.3547	9.26601	11.4402	10.7914	8.53508	5.49061	10.7105	8.32826	4.31742	15.292	1.35348	14.0701		1.19083	0.853415	14.7434	13.2321	9.12724	13.6184	10.9616	11.0946	6.82446	11.448	6.14229	3.52831	15.3321	1.24569
1.1925	9.7607	8.1807	3.73089	7.30642	5.7676	7.61494	3.39254	6.83801	2.3374	1.36547	11.1088	0.759692	1.3937		1.1925	0.866957	13.2051	8.57063	12.1108	9.28021	10.4925	5.84941	10.5251	8.01299	3.86963	14.1745	1.316	14.5082		1.1925	0.876641	13.8977	13.9417	11.2372	13.9876	11.3741	11.9853	6.63099	11.4689	6.43958	3.98836	15.7543	1.51095
1.19417	9.22328	8.23376	5.13632	9.78214	6.44469	7.90245	2.12136	6.23836	3.08989	1.78286	10.9416	1.40418	1.0247		1.19417	1.04356	13.4413	8.65093	11.996	9.83457	12.0097	6.03929	11.1619	8.10697	4.6601	13.3179	1.36431	14.2688		1.19417	1.00116	16.2468	15.5907	8.97903	13.5985	10.3363	13.2093	7.14524	12.1591	7.50611	3.10337	16.313	1.24115
1.19583	9.46353	9.027	4.3529	8.54556	5.61441	8.14882	3.75888	5.62198	3.39584	1.64363	12.046	1.11038	0.615359		1.19583	1.52999	13.8031	7.8018	14.8467	11.398	10.8778	7.45878	10.6447	7.46034	5.8272	15.4862	2.01116	14.4234		1.19583	0.940561	16.47	15.4668	10.2224	13.4555	11.3702	12.3686	6.45371	11.8041	6.06486	3.05964	16.0845	1.09725
1.1975	9.53406	8.07486	5.76013	8.88652	5.38064	6.918	4.56598	5.95275	3.60199	1.42139	11.2505	0.947888	1.09449		1.1975	0.936873	11.353	9.27919	13.0115	10.6632	9.93441	5.36635	10.189	8.44163	4.68278	13.9241	1.15327	14.4039		1.1975	1.42673	14.4837	17.8554	11.9158	14.9331	12.2872	11.9566	6.7569	11.0533	7.43922	4.05381	17.5031	1.54699
1.19917	9.35965	9.02683	4.1979	6.80038	5.84208	8.94018	3.88714	5.86869	3.85697	1.33557	10.7668	1.03529	0.798343		1.19917	1.21632	12.2122	8.2677	14.0447	10.9548	11.6256	6.715	10.1908	7.86691	4.77118	14.489	1.23613	14.9372		1.19917	0.646054	15.3833	14.9123	10.7179	14.7381	11.6279	14.1437	6.29726	13.09	5.51586	2.55924	17.3854	0.770577
1.20083	9.93631	8.7014	4.93148	9.13008	6.20668	8.23551	3.00185	6.66987	2.90406	1.12579	12.2659	0.406412	0.573151		1.20083	1.3462	14.0556	10.8356	13.531	11.9869	11.6179	7.81876	9.06547	8.46042	5.41422	12.9453	1.52573	15.7769		1.20083	0.751144	16.6722	16.7745	8.7493	13.5319	12.3712	12.6025	6.95026	13.2047	8.01431	4.27701	17.3184	0.637054
1.2025	12.0068	7.39181	4.61737	8.99696	4.44558	7.65449	2.65891	6.5166	3.72615	1.24608	11.6565	0.917095	1.01006		1.2025	0.800036	12.9734	8.15625	12.957	10.6315	11.6156	7.35167	11.5722	8.45585	4.14617	15.9247	0.651772	15.6515		1.2025	0.67066	15.9454	15.2953	10.9918	15.1243	11.0324	12.8823	6.18602	14.573	7.31038	4.62266	15.4173	0.642693
1.20417	8.94285	8.80371	4.82859	8.76775	6.35986	9.03432	3.46925	7.56719	3.88933	2.36857	11.2533	0.825138	0.983768		1.20417	1.57174	13.0538	9.63735	13.7068	10.1809	12.3046	6.634	10.275	7.25149	5.09295	15.8478	0.951281	16.0693		1.20417	1.38687	16.1889	15.3589	11.3114	13.9979	12.8849	14.4169	6.42257	13.0353	7.034	3.57527	15.0449	1.17758
1.20583	10.7936	7.86918	5.26198	10.6453	4.98072	7.17884	4.29906	8.45146	5.73911	2.19907	10.5838	0.980504	1.42111		1.20583	1.25605	15.3395	10.1041	12.3426	11.5311	10.418	5.92554	9.90142	8.33263	5.44429	17.4696	1.55684	14.3056		1.20583	1.44532	16.2692	16.5684	10.6343	15.1976	12.2703	12.8052	6.97841	13.4837	8.11183	4.53768	18.0325	0.933405
1.2075	9.12086	9.49747	5.45003	9.05701	8.04907	7.89924	4.42906	7.60144	3.81694	1.34212	10.8246	0.461606	1.1079		1.2075	0.861003	14.6502	8.80525	10.4489	10.7805	10.2007	7.10865	10.8712	10.6966	5.99991	16.9006	1.04869	16.9786		1.2075	1.55466	17.4956	15.0485	10.6948	14.8644	12.3203	12.5957	8.51325	12.448	8.88978	4.63967	17.0221	1.9861
1.20917	9.7361	8.41976	6.55197	10.1511	7.88114	8.17892	3.94366	7.86539	5.0502	1.19507	11.4912	0.740093	1.08453		1.20917	0.642802	13.2174	9.23891	11.7876	11.508	13.0471	6.92266	9.76917	8.17084	6.43558	15.7235	0.468936	15.2532		1.20917	0.496289	16.7667	14.413	12.4334	16.4612	13.0521	13.8582	8.69136	14.208	9.56061	3.32878	18.2005	1.25677
1.21083	12.0348	7.08926	5.94645	8.40572	6.72027	9.32215	3.29052	6.83932	3.78802	2.14969	10.6871	1.20446	1.31497		1.21083	1.15516	13.2988	9.55789	11.8041	10.984	12.4535	6.92357	12.2094	8.26203	4.82876	15.5586	1.92016	15.3869		1.21083	0.897327	16.8814	16.9415	10.6486	14.5074	12.8285	13.074	7.15753	12.35	7.27337	5.01002	14.5731	1.13401
1.2125	11.4663	7.99164	5.51151	9.37173	7.03695	8.59845	3.99144	6.97317	5.38787	1.4654	11.5304	0.97371	0.681004		1.2125	1.3089	15.2783	11.4357	12.0526	10.8707	10.8378	8.37433	10.8079	8.0948	5.21807	18.1918	2.79981	15.2958		1.2125	1.2163	15.8238	17.1997	10.307	17.2312	11.7473	13.8884	7.07267	14.6584	7.78184	3.90169	18.578	0.550049
1.21417	10.5749	9.02362	6.09694	9.3204	6.21713	7.50574	3.05552	8.69637	3.51228	1.94992	13.2195	0.561104	1.49344		1.21417	0.992332	13.8788	9.4416	15.9363	10.5793	11.1856	7.58467	10.0448	8.6573	5.46878	17.3636	1.69457	16.1342		1.21417	1.23489	16.7544	15.0374	12.0036	17.2819	10.8532	14.8886	8.9576	14.2895	8.70487	3.58953	18.9557	1.67506
1.21583	11.941	10.7523	5.41222	10.0753	5.71391	7.80743	4.06497	7.63806	4.40437	1.83385	11.6108	0.53095	0.743381		1.21583	0.865724	16.3255	9.56826	12.6234	10.8379	14.3322	7.4241	11.8164	8.25737	4.84336	15.7444	2.16476	20.4459		1.21583	1.31417	14.7441	17.309	14.026	16.553	13.0025	12.9929	8.38297	15.1611	9.80347	4.30117	18.1684	0.985426
1.2175	10.845	9.63789	6.04165	9.17928	7.84367	6.83978	4.017	6.55209	5.37298	2.66623	14.2462	1.33704	1.02459		1.2175	0.889005	13.8634	9.69424	13.3509	11.8627	13.2598	7.74319	12.473	9.67796	5.84887	15.3981	2.07407	16.656		1.2175	1.53907	15.9823	16.5659	11.6866	17.0558	15.2321	14.5539	7.69373	14.8671	8.67932	4.49746	17.3981	0.361769
1.21917	10.8982	10.3371	5.8836	10.2823	6.37824	9.77639	4.08421	8.13179	4.49679	2.20823	13.0491	0.702109	1.30573		1.21917	1.32002	13.4765	9.16812	17.5197	13.8071	13.0654	7.25708	12.7871	8.03188	5.79219	17.0046	1.01935	17.2622		1.21917	1.01885	17.8353	18.1829	14.0477	14.4909	13.5615	13.0795	9.28679	15.0275	9.37706	3.98596	17.2885	1.1179
1.22083	11.2051	10.3152	6.56225	10.7361	7.7739	8.98941	4.51793	7.22765	6.14375	1.60647	15.3758	0.555963	0.77511		1.22083	1.45385	13.222	11.1594	18.8041	12.6197	12.8617	7.50138	12.2021	9.61289	5.6427	16.968	1.60684	18.084		1.22083	0.932901	19.6199	15.8351	12.8964	16.5957	13.5642	15.208	7.84464	14.2581	8.30404	4.74351	16.7607	0.687533
1.2225	13.2279	9.20318	5.57619	8.91671	8.51236	8.45494	4.46888	8.18582	4.54552	2.13267	12.8699	1.1596	1.1832		1.2225	0.983504	16.9558	11.8597	14.2377	13.2856	11.6036	6.7195	12.1961	8.51828	4.7085	18.9798	1.15757	18.193		1.2225	0.60294	17.1687	15.2392	13.29	17.4138	11.9181	14.3179	7.60335	15.7404	9.06569	5.22555	17.6035	0.954785
1.22417	11.6741	9.40999	7.78115	10.4142	7.09311	7.84664	4.99533	8.69421	3.90369	1.84147	13.762	0.645397	1.1476		1.22417	0.760506	14.8381	9.44497	14.6434	12.9205	13.4037	7.70044	15.4182	8.49106	6.03515	18.1707	1.30826	17.3852		1.22417	0.988808	17.2528	15.7525	15.3522	18.6053	12.2247	14.5277	8.39414	14.6453	8.82016	3.88731	16.6489	1.41807
1.22583	12.7959	9.06114	5.60428	10.4362	7.60392	9.05763	4.31926	7.68136	3.99501	2.1166	12.2425	1.19289	0.81673		1.22583	0.855207	16.5714	9.9755	14.1755	11.716	12.4745	8.31587	13.2075	10.0735	6.23129	18.8724	1.13517	16.2285		1.22583	0.915252	18.4204	17.2933	12.5146	17.4564	13.7992	13.6891	9.81334	14.1326	10.6321	4.6603	16.7681	1.34502
1.2275	11.4766	9.22852	5.31285	11.9559	7.84265	8.5129	4.90027	8.22251	5.10798	1.77349	11.676	0.868621	0.96434		1.2275	0.977117	17.5109	10.1534	16.3433	11.9953	13.7223	7.66119	12.8017	8.07503	5.62223	20.8176	1.40509	17.6183		1.2275	1.17047	19.45	18.2931	13.1183	16.4301	14.4985	14.1989	8.68427	13.8104	9.50186	4.55037	18.6697	1.66729
1.22917	10.7058	9.51954	5.1063	11.3985	7.63059	9.33036	3.64539	9.34888	4.97695	1.6493	11.7416	0.815941	1.00307		1.22917	0.809062	14.5853	12.2247	14.0445	12.9779	12.7946	7.62009	13.1772	8.94304	6.84476	19.4609	0.627222	19.6235		1.22917	1.19318	19.0191	17.6133	11.6833	18.2179	12.5661	13.9732	8.52555	16.6276	8.50726	4.4523	18.6553	0.985426
1.23083	11.9122	10.2461	7.39521	8.68179	7.89227	9.67688	4.84978	7.12527	4.30668	1.9063	13.3884	0.929204	1.38079		1.23083	1.17116	16.475	10.7675	16.5435	11.9618	12.9693	7.95183	14.9914	9.66372	5.91089	19.6293	2.01505	16.6036		1.23083	0.671892	18.7855	18.9785	13.8278	18.676	14.8053	15.9566	10.0281	14.3894	9.66088	4.67637	19.8542	1.52471
1.2325	12.0629	11.0443	6.41662	10.8284	7.30509	8.12581	5.31398	9.18434	4.79331	1.74553	13.0436	0.665395	0.830087		1.2325	0.4248	16.5792	12.1324	19.1598	13.3497	12.7882	7.23061	14.0322	10.4305	4.86953	20.2484	0.923693	18.6282		1.2325	1.09806	19.8328	16.1126	13.393	18.635	14.0323	14.638	8.77721	17.262	9.15433	5.4109	17.9186	1.81881
1.23417	13.5455	11.4471	5.80766	9.22481	6.94567	9.91756	5.48769	8.306	3.96458	1.6687	14.5406	1.03028	0.909229		1.23417	1.12879	15.4223	11.3321	14.9265	12.7758	13.7471	8.76783	12.1826	9.36341	6.01474	18.1799	1.59947	19.2498		1.23417	1.06245	17.5101	16.1266	13.1446	18.9891	14.1564	14.5277	9.43727	15.6551	10.9001	3.83399	16.8966	0.998832
1.23583	13.1249	10.8722	5.71895	11.1123	6.65601	9.24743	4.89166	8.42568	5.34737	1.88215	12.3315	1.00516	1.7498		1.23583	0.881271	18.1795	10.4534	14.611	14.8273	13.4899	8.73587	14.0811	11.4513	6.48989	19.6892	1.17273	17.355		1.23583	1.20821	18.4108	16.0533	12.7973	17.1302	15.5435	17.409	10.3809	15.4186	7.98116	5.66135	18.6454	1.55422
1.2375	12.7785	11.9192	6.51974	11.6352	9.53887	10.3333	4.86829	8.49776	6.0333	2.22862	15.5005	1.27877	0.928866		1.2375	1.01608	16.063	12.0597	15.6022	12.2032	14.0245	8.06724	14.6483	10.9774	6.79417	19.8739	0.961328	19.564		1.2375	0.666149	17.2181	17.8167	12.8194	16.9751	14.5815	16.4478	9.2367	16.71	10.6583	5.14893	19.7389	1.32188
1.23917	13.1014	10.8982	6.70095	11.7832	8.1463	9.76215	5.35709	9.98092	5.39325	2.40035	13.5679	0.975393	0.588107		1.23917	0.988551	16.8499	11.1145	16.5551	13.671	15.0166	8.92434	13.297	10.1991	6.11659	20.2577	1.06616	20.4001		1.23917	0.421595	18.895	19.6713	14.2519	17.1475	15.5971	14.8299	9.91464	16.9266	9.8611	6.05039	19.0855	1.69337
1.24083	15.9198	11.6625	7.0171	12.566	10.4321	9.14428	3.65609	9.13581	5.33214	1.85697	13.03	0.887792	0.586944		1.24083	0.995685	17.7238	11.5385	17.9496	13.1959	13.9493	9.57221	13.1868	9.60772	7.04031	17.1611	1.30159	19.3488		1.24083	0.444069	19.2497	17.0997	14.3741	19.4368	15.3816	15.3581	10.0821	16.9971	12.7304	5.62058	19.5504	1.60428
1.2425	13.764	11.1542	9.14956	9.29114	7.98655	10.0251	4.9463	9.78951	5.70074	2.04545	14.9651	1.58989	0.708596		1.2425	0.703139	18.025	12.3866	16.5961	15.166	14.1582	9.66091	12.7744	9.93977	6.70366	18.0328	1.39215	19.1904		1.2425	1.51085	21.693	19.0794	14.3393	17.4736	14.3656	16.2399	10.8905	16.4295	12.4276	5.21422	19.5656	1.55783
1.24417	12.638	11.6783	6.13462	13.7772	8.70557	10.87	4.63642	8.40442	6.28545	2.22353	15.0018	1.32742	0.990579		1.24417	1.2192	17.7431	11.5621	14.7597	14.6031	13.5259	8.6453	14.4249	10.8591	7.49048	19.5844	0.966157	19.1367		1.24417	0.605381	18.3999	18.5364	14.1275	21.9305	15.1137	14.8965	11.5859	14.7528	10.697	5.23642	20.6044	1.0012
1.24583	12.6878	11.2859	8.24942	13.8038	8.32859	10.1868	5.27963	7.96188	6.59536	2.27328	14.5895	1.35717	0.938506		1.24583	0.76869	17.1196	13.5272	14.9119	15.0239	13.4348	10.5017	15.0506	12.0959	6.78539	20.8883	1.37013	19.1092		1.24583	1.01021	20.1164	21.0751	14.2408	18.8244	17.1219	16.8889	9.33707	16.5612	9.61875	5.23115	20.617	1.27364
1.2475	12.5883	9.93425	8.9126	10.6884	9.9791	9.76419	5.45523	8.2818	6.19015	2.63814	15.9893	0.57337	1.33127		1.2475	0.794456	18.4254	10.7008	17.3011	16.1877	14.5945	10.4437	15.0672	12.543	8.35147	18.7964	1.15095	18.107		1.2475	1.05896	18.4521	19.7844	15.068	18.7682	16.5745	17.5304	10.3384	15.2212	11.6724	4.97794	21.9567	1.78467
1.24917	13.9713	12.3383	8.38228	9.75048	8.54003	10.707	6.07855	8.3951	5.11011	1.62229	15.7053	1.08712	0.745958		1.24917	0.794101	17.0375	12.2409	17.4125	13.5646	15.9931	11.025	16.9252	12.7357	7.08286	21.9753	1.42978	20.6196		1.24917	0.759092	19.9349	19.4762	14.0036	18.179	15.5147	17.7691	9.86136	19.1318	10.0685	5.03296	18.4987	1.38374
1.25083	13.3095	11.9865	9.21764	10.4116	6.94539	10.022	6.57607	8.79846	5.85823	2.29297	16.155	1.05794	1.10073		1.25083	0.597477	19.7823	12.5677	16.1282	15.3169	15.3558	9.11272	14.6376	10.8603	7.33315	21.2829	1.90924	20.7403		1.25083	0.78923	20.1437	19.2652	15.3757	19.2163	12.8834	16.5214	10.6221	16.6137	10.212	4.87583	19.2442	0.89188
1.2525	13.9429	12.7743	7.58665	11.8084	8.65228	13.4695	6.98345	7.97911	6.83712	2.27175	14.9405	1.21036	1.09046		1.2525	1.24863	15.7104	14.1874	18.6187	16.2668	16.7019	9.99024	16.1856	11.8193	5.50019	20.6098	1.51696	22.3336		1.2525	1.0232	22.5297	21.8788	15.5536	20.982	16.9437	16.7375	10.272	14.7708	10.304	5.94768	20.667	0.604724
1.25417	13.9878	12.1669	7.66431	12.4526	10.5108	11.1452	5.41895	8.89359	7.24803	1.60981	13.2337	1.14346	1.17714		1.25417	1.25438	17.0555	14.5794	16.545	16.9795	16.936	10.0528	15.7705	11.8659	6.86485	20.2939	1.48538	22.1223		1.25417	1.23277	19.7499	21.8883	12.9832	20.9883	15.3739	18.2746	10.733	16.4548	11.2419	6.5576	20.6073	1.08347
1.25583	13.5266	11.485	7.30078	13.7937	8.89131	11.917	6.35127	10.1384	5.87874	2.4136	14.0027	1.15695	0.775211		1.25583	1.14388	19.1337	15.0208	14.6949	14.4952	17.6341	11.3608	17.1958	12.0011	7.09771	22.4385	0.877734	21.6828		1.25583	1.28225	22.2327	21.9377	13.8097	17.8004	17.5027	16.1178	11.4127	19.239	12.8272	5.83589	21.1787	1.16731
1.2575	12.8499	12.0325	9.05414	12.1672	8.65399	10.5207	5.72942	8.64313	5.3737	1.8939	15.3552	0.877963	0.487567		1.2575	0.868674	18.8641	11.8809	17.4814	14.8018	16.0129	9.87315	15.9843	13.4867	7.85287	21.2825	1.18754	19.5749		1.2575	0.831778	20.6671	19.0898	16.3519	19.8183	15.324	17.1948	9.11802	17.5177	12.8738	6.36455	21.1352	1.16638
1.25917	14.8744	13.9839	8.80248	12.1217	8.78564	10.2177	5.74199	8.89518	6.31214	2.59143	13.9343	0.986131	0.660269		1.25917	0.911063	20.8266	13.7381	15.936	16.191	15.1151	10.8003	16.6144	11.5919	7.42592	19.3694	1.94482	25.1173		1.25917	1.21089	20.0676	19.7977	15.8846	19.9047	15.618	17.2451	11.6951	16.7063	11.2467	6.37594	20.4395	0.360897
1.26083	12.5729	11.1758	7.78871	13.678	9.63728	11.1886	5.12628	11.5302	5.74598	3.61411	17.141	1.06717	1.16307		1.26083	1.1504	18.9774	12.423	17.2938	15.3993	15.7892	9.44265	16.7765	11.77	8.50144	20.8013	1.51938	20.3202		1.26083	1.58745	20.2271	20.0699	15.4026	18.5876	17.5617	20.6007	10.5909	17.5649	13.3455	6.29714	22.5465	1.11969
1.2625	12.5697	12.0368	7.39349	10.6173	7.89326	11.8253	5.07397	9.4128	7.14464	2.63825	15.5279	0.884498	1.16443		1.2625	0.664894	19.2207	13.0583	17.9219	16.5046	15.4621	11.6498	16.9548	11.9834	7.41279	21.2053	0.701315	20.5164		1.2625	1.0148	19.7962	22.4198	14.8272	20.9223	14.7462	19.1366	11.1191	17.0464	12.5904	6.27305	21.6684	1.41474
1.26417	13.0605	10.1342	6.99176	11.9061	10.1177	10.3486	6.2522	10.034	6.20917	2.51101	17.5193	1.11259	0.788143		1.26417	0.983326	20.421	13.806	18.1743	16.2487	17.3192	12.0806	16.378	12.9944	8.11016	21.7491	0.38388	20.0971		1.26417	0.631299	20.1305	20.8127	15.1461	19.4132	19.6036	19.094	11.6965	20.7927	12.7945	5.57877	21.2212	0.700066
1.26583	15.1007	11.5204	8.65263	12.0637	9.91637	9.50319	6.69309	10.6418	7.24717	3.182	16.3103	0.656858	1.26582		1.26583	0.894279	19.6137	15.0927	19.1295	15.2121	15.7567	12.2132	17.0146	12.902	7.33388	21.9571	0.902685	20.5997		1.26583	0.752779	21.864	23.4474	14.2883	19.3904	16.6721	18.1438	12.5122	17.15	12.6485	6.38778	22.9037	1.04275
1.2675	16.8153	12.1979	10.4996	12.0071	9.09051	10.4705	7.22474	10.0865	5.94473	2.64966	16.7372	1.48284	1.10898		1.2675	0.742845	20.4158	15.1195	17.6464	15.3379	17.4642	11.4675	16.9161	12.6319	7.65904	20.5279	1.24666	22.1368		1.2675	1.07742	21.9438	21.1851	16.2281	21.9045	18.2053	16.2945	10.777	19.1134	11.5491	5.8792	23.5867	2.14957
1.26917	15.8972	13.7547	9.57259	11.8228	11.3357	12.3235	5.85203	9.02638	8.04201	2.75295	15.0912	1.0522	0.837392		1.26917	1.21609	17.4465	14.2794	19.6628	14.2702	17.8129	12.1876	17.4129	14.0321	9.29827	19.3094	2.00472	23.4295		1.26917	0.62065	22.7001	20.4086	14.1522	22.1914	14.7551	16.5675	11.6945	16.3129	12.0724	7.26643	26.0852	0.997408
1.27083	14.6932	10.9145	10.5047	12.7622	9.64564	10.4395	5.63158	11.206	7.07367	2.32383	15.5212	1.27705	0.909595		1.27083	0.981568	19.6701	14.2848	18.9839	17.2898	17.3039	10.6347	16.2756	13.0146	7.56002	22.7933	1.56345	21.5313		1.27083	0.914199	19.9417	20.1808	14.9739	20.4503	15.615	19.4268	13.4343	21.6746	12.4242	6.61117	21.0343	1.0898
1.2725	14.4065	11.3627	9.20042	12.962	8.20177	11.8793	8.35204	9.58848	6.27393	2.69223	16.1673	1.05083	1.27028		1.2725	1.40769	20.419	14.799	21.2194	15.6202	18.3628	10.5617	21.3044	14.7523	8.18866	23.3483	1.43856	22.9525		1.2725	1.40775	22.4463	20.7159	15.5102	20.1577	16.3545	16.9023	13.2281	18.8707	13.7172	6.76202	19.3966	1.27887
1.27417	14.626	12.0959	7.4336	12.8249	9.2936	10.9329	6.29469	9.36544	7.6906	1.48667	19.6018	1.26748	0.825303		1.27417	0.784433	18.5928	16.7167	20.1819	15.6957	16.7065	11.3427	18.8594	13.6525	7.35091	21.2666	1.21729	23.5746		1.27417	0.868481	20.3692	22.974	15.1325	22.4622	17.4016	19.9965	12.0604	20.9296	12.8698	7.83619	19.912	0.729119
1.27583	16.1855	13.7415	9.44597	11.3511	9.4769	11.7391	7.14836	10.0204	7.38919	2.79296	16.2426	0.776716	1.29219		1.27583	0.348804	16.5683	14.2179	20.1591	16.3369	17.2336	12.6929	18.7319	11.5297	9.34855	23.9212	1.303	22.0504		1.27583	1.603	21.2903	23.1365	17.3032	21.1687	18.3628	18.0012	12.2211	19.8369	13.5478	7.90584	21.4089	0.867968
1.2775	15.2379	13.5863	8.1909	11.5381	9.46407	13.1256	6.5464	9.85707	7.76504	3.4909	15.3738	1.42805	0.729739		1.2775	0.876482	21.1723	15.2197	20.2458	16.2024	17.0923	13.4036	17.4837	13.0665	11.1534	24.4836	0.791208	22.1135		1.2775	1.02443	22.1903	20.7765	15.7916	22.4658	17.0007	18.1524	12.5655	21.3549	15.5523	6.56061	21.4787	1.22787
1.27917	15.387	13.0417	9.33085	14.3092	9.75173	13.1945	7.9182	10.4824	7.31255	3.41662	15.4257	1.23147	0.901654		1.27917	0.854046	19.7464	15.5463	15.8529	15.8642	15.9642	11.0224	17.5344	13.595	7.02462	23.4241	2.03746	21.2032		1.27917	0.432189	23.1762	19.7922	15.7013	20.6305	17.66	20.7512	11.0836	19.9294	13.8845	7.31987	20.7469	1.11752
1.28083	14.5077	13.0126	10.3482	13.5956	9.37071	11.7075	8.12848	11.509	7.99943	3.20102	17.2553	0.758084	0.955343		1.28083	0.954589	19.9289	15.3733	20.6812	16.0379	17.905	11.4189	15.9416	13.4855	7.54422	21.8744	1.46698	22.6211		1.28083	1.05863	22.41	21.054	16.769	22.0875	15.961	18.789	13.4266	17.3992	12.412	7.17204	23.4357	1.14478
1.2825	17.0141	13.8145	11.0372	13.9333	8.83703	12.355	6.69759	10.4313	7.35747	3.3481	18.0944	1.7884	0.658776		1.2825	1.2681	18.7416	16.1451	16.6452	19.4142	17.0431	11.7478	19.5921	13.0579	8.65087	23.286	1.11075	22.9038		1.2825	1.08595	21.9225	19.4984	15.7123	22.147	16.9582	19.1951	12.7331	19.4204	13.4491	7.46635	20.6033	1.67952
1.28417	13.1618	13.5826	10.5019	12.8077	10.8321	12.6745	8.41712	12.0382	6.86927	3.22877	16.1846	1.21889	0.505252		1.28417	1.13359	20.2798	13.9664	18.9793	15.1338	18.7268	13.2712	17.8744	12.2148	7.77137	21.7919	0.940265	23.8748		1.28417	0.948746	23.8116	22.0614	18.748	21.6869	18.4575	18.2637	12.5448	19.6475	12.4214	8.60803	24.5261	1.23573
1.28583	15.1066	13.7657	8.71145	14.2331	11.4995	12.19	8.71572	12.09	6.27568	3.08093	15.5968	1.40983	1.43543		1.28583	1.32976	19.6629	14.3625	20.162	17.9245	18.3873	11.7787	17.7541	13.9692	10.5207	21.001	0.647206	24.3074		1.28583	0.738552	22.6825	21.2443	14.8203	21.467	16.991	19.1314	12.9227	21.466	15.2489	7.31783	22.0914	1.38444
1.2875	16.0903	11.8004	9.08382	14.4386	11.0914	12.4212	5.89242	10.4567	7.8166	3.10113	20.0443	1.47056	1.0158		1.2875	0.508636	19.7884	17.3545	18.7174	16.6415	18.6146	11.9744	18.7832	13.8758	8.21225	22.1283	1.68113	20.9931		1.2875	0.958242	22.633	22.4555	15.5844	23.2438	18.6711	19.1269	14.0024	19.8474	14.3671	7.70296	22.9469	1.04254
1.28917	15.256	13.2251	11.1383	12.7338	11.4672	12.4089	8.6711	12.0661	8.76219	3.14261	17.7016	0.743131	1.57091		1.28917	1.19169	22.2082	15.276	17.6585	17.6232	18.2575	11.4555	16.6249	15.0357	10.0406	22.4054	1.54919	20.1065		1.28917	1.04301	23.4565	19.3869	16.8072	20.3331	18.2135	18.6492	14.1872	21.5828	13.2215	7.85926	22.7817	1.2452
1.29083	16.5515	13.7437	9.87924	13.4356	11.3381	13.5517	8.31742	12.0697	6.9267	2.80112	17.5269	1.01429	0.875991		1.29083	1.36497	20.5435	15.0723	18.9233	18.5166	19.4619	13.0914	18.0536	14.9219	8.58494	23.9771	1.5925	23.195		1.29083	1.04628	23.5007	20.6729	16.4271	23.7696	18.6611	20.2454	13.7318	21.3001	13.4735	6.55875	25.0778	1.26284
1.2925	15.9624	13.0484	10.1564	12.3884	11.9017	14.3054	8.29556	11.9436	7.62729	2.94438	17.6664	0.776414	0.952773		1.2925	1.09512	19.6399	16.7894	19.616	21.2095	18.291	12.889	18.1179	14.3837	8.93507	22.7084	0.831772	22.0932		1.2925	0.823384	22.4127	21.0696	18.7457	23.5483	16.7277	19.1429	13.8699	20.0605	16.6037	7.05825	21.3492	0.54852
1.29417	13.3851	14.3211	11.0535	13.311	10.9943	13.9708	7.45494	11.9204	7.22156	4.61085	16.5153	1.18901	0.64921		1.29417	0.786782	20.5856	17.9265	20.7571	18.6786	19.159	11.8907	20.5189	14.6961	9.56935	24.387	0.945646	24.431		1.29417	1.12964	22.8499	22.9671	17.9109	21.5922	19.5799	21.8653	13.5015	20.8488	15.908	7.78285	22.3324	0.758058
1.29583	15.0883	12.0192	9.7469	13.0544	11.2473	11.7775	8.61499	11.6993	8.19026	3.35735	15.4185	1.1571	1.11899		1.29583	1.06558	22.442	15.4551	17.5197	19.6699	18.3644	13.4343	17.4132	15.232	8.46872	25.2797	1.48004	22.6205		1.29583	1.07914	22.9406	25.5843	19.5003	21.8205	18.4792	21.1388	13.7893	21.9495	13.8043	8.41236	19.4139	2.37974
1.2975	15.1536	15.1261	9.8987	14.3114	10.7339	13.23	7.05865	11.8327	8.70413	3.03425	18.0858	0.612678	0.925806		1.2975	1.16126	19.9133	16.8681	18.0258	16.1784	17.2893	11.5104	19.3994	13.4522	11.082	25.1526	2.33118	23.8315		1.2975	1.22671	23.1774	22.4032	17.1576	23.1911	18.8214	21.674	11.7164	21.4938	16.1601	8.55388	22.4793	0.904226
1.29917	16.1265	13.9889	10.0276	15.7385	12.1029	14.6192	5.99746	13.0173	7.48741	3.35223	17.9522	0.840517	0.991185		1.29917	0.763153	21.9873	17.1849	20.2014	18.4504	18.1897	11.9625	17.2619	14.5841	9.48883	24.2371	1.06122	21.8448		1.29917	0.992706	23.4418	23.5041	16.4354	22.5425	16.8037	19.6216	12.5376	20.0574	15.6124	7.82178	23.405	1.29353
1.30083	13.99	14.7405	9.75006	15.999	12.1628	15.3565	8.35219	10.404	7.68938	2.60502	19.5431	1.35762	0.925667		1.30083	1.27244	20.7076	15.6819	19.1175	16.0317	17.7339	12.315	19.7203	15.5429	9.01398	25.4989	1.1708	23.8326		1.30083	0.735655	23.3944	23.373	17.7286	21.363	19.1494	16.3957	14.7819	21.7039	15.0222	8.14929	23.8312	1.02937
1.3025	16.0706	13.7964	9.47361	14.8142	12.0904	14.4243	8.24534	12.0947	9.26157	3.45213	18.6719	0.882038	1.42616		1.3025	0.698938	21.3885	16.8025	20.6088	19.6189	18.1622	11.4451	18.5215	14.6195	7.86307	24.6367	2.14787	23.1562		1.3025	1.21441	23.1807	22.765	18.509	23.1466	18.7044	21.1223	14.0609	20.5543	13.2212	8.82912	23.9662	1.12346
1.30417	18.0728	13.5036	11.9376	12.7064	11.5618	12.9063	7.80297	13.0306	9.0667	3.318	17.3433	1.04589	0.921639		1.30417	1.30833	21.9423	15.9043	20.4284	20.3976	17.0688	13.5422	18.8618	16.1474	9.87703	23.5139	1.80768	24.9325		1.30417	0.655222	22.986	22.069	16.5631	22.6739	19.0217	20.3436	16.5868	23.9828	15.7955	8.53167	22.0451	1.3171
1.30583	16.7025	13.1627	10.6034	14.8815	12.6763	14.6277	7.36718	12.8629	8.03376	4.43865	19.2981	0.883564	0.854409		1.30583	0.986518	20.8533	16.3907	22.228	20.2506	20.0869	12.9499	21.5373	14.4128	9.70008	23.2201	1.33998	23.9491		1.30583	1.12005	21.3583	22.9393	19.1567	23.1903	20.3324	19.6028	14.3628	22.4238	16.2674	9.02964	24.5349	1.25831
1.3075	16.0645	16.9765	9.75799	16.0007	11.4935	14.6622	8.31238	13.9031	9.93439	4.22753	18.1972	0.718876	0.969451		1.3075	0.882827	21.7169	16.6485	23.6929	16.9434	19.7519	12.9627	19.963	15.2176	10.6231	24.0772	1.45623	24.2836		1.3075	1.62479	24.3653	25.715	18.8812	22.6649	20.0393	22.2095	14.3379	23.3939	15.1669	10.3043	24	1.3083
1.30917	17.2889	14.5424	11.4443	13.9463	12.437	15.3548	8.07746	12.766	7.51861	4.08089	19.7172	0.681387	1.01607		1.30917	0.83284	22.1359	16.6601	22.9111	19.5082	19.3058	12.9032	18.8989	15.2571	9.67947	24.1173	1.27967	21.9932		1.30917	1.32083	22.5017	24.7154	17.3049	23.9157	20.3878	19.3879	12.951	23.0119	17.1916	9.99294	26.6311	0.738677
1.31083	16.6932	14.373	12.6941	16.272	12.4447	12.6348	9.11721	12.961	8.70452	4.37874	16.1952	1.57934	0.987612		1.31083	1.4742	22.3751	16.2136	22.3364	20.4034	18.5356	12.5487	19.2162	16.4825	9.29532	24.2001	1.50904	23.4669		1.31083	1.17719	24.5165	23.7284	17.7495	24.037	17.2511	18.8767	15.533	22.5528	16.0857	9.52602	23.5691	0.889407
1.3125	18.2841	13.0272	11.068	14.873	10.7503	14.2481	8.39641	12.5727	10.2958	4.17562	17.5414	0.911212	1.65372		1.3125	1.0471	21.9919	16.0516	22.8543	19.0494	21.3939	12.7606	19.6461	14.3839	9.91334	24.6607	1.02207	24.1837		1.3125	0.483492	27.7928	22.5675	18.4324	22.2711	20.7343	22.2802	14.7474	22.3313	16.0555	8.66514	23.6463	1.62312
1.31417	15.716	15.2528	10.591	16.9326	13.2003	13.0374	8.58797	11.2636	8.33218	4.66676	18.5842	1.4111	1.18117		1.31417	0.973581	22.9083	17.1144	22.1241	19.9776	20.0732	12.0234	20.0765	15.7976	11.0636	23.6688	0.787455	24.1774		1.31417	0.6201	23.7444	23.0956	19.626	22.7148	19.729	20.6881	16.041	24.0871	17.1737	10.7844	24.8115	1.5737
1.31583	16.1917	15.718	11.3465	14.6965	11.9432	15.0133	8.40547	12.4375	7.88291	4.00287	19.7478	0.959263	1.88493		1.31583	0.876482	20.5771	15.6907	22.2271	19.8993	22.3051	12.9538	22.1612	16.3622	7.26679	25.2571	1.79515	23.9935		1.31583	1.63747	24.2071	23.4765	18.442	24.3898	20.8229	21.103	15.1843	26.2481	15.8235	10.2604	23.4249	1.39644
1.3175	16.9537	16.2995	10.8371	14.2659	14.3262	14.2035	9.86223	13.5015	8.79639	3.30319	18.4167	0.947909	1.16475		1.3175	1.22516	22.3864	17.8744	20.9174	20.9896	20.365	14.4627	21.8376	14.008	11.707	24.5672	1.45144	26.4052		1.3175	0.790422	25.2235	24.4741	17.6023	21.6262	20.6922	21.5639	13.8751	25.0487	15.1685	8.40244	23.2533	0.560614
1.31917	18.1549	14.8958	11.919	16.0197	13.6285	15.6774	7.38823	11.1349	9.51187	3.48111	18.8161	0.779103	1.40821		1.31917	1.02797	22.8973	17.1972	21.9012	18.9232	18.8773	13.1491	19.1581	16.3439	11.8968	25.442	0.127036	25.3701		1.31917	1.20707	24.6747	23.0528	18.6218	25.9023	18.406	22.7383	14.7527	20.8418	16.3431	11.2676	24.4648	0.827998
1.32083	16.6521	16.9401	11.0792	15.2524	12.6953	14.2913	9.56887	11.9043	10.2947	4.24532	21.7256	1.19707	1.03388		1.32083	1.24294	22.6179	16.9989	20.0611	18.8707	21.7735	13.9929	21.9426	16.2406	12.4751	25.1582	1.68743	28.5363		1.32083	1.05689	22.8534	23.3634	16.9608	24.1371	18.7118	20.7812	14.5617	21.5372	17.2864	8.38043	25.2545	1.52006
1.3225	16.2504	15.3203	12.5859	16.6348	12.64	13.7935	8.83712	13.5762	9.55884	3.18876	20.7869	1.00935	0.687858		1.3225	1.1049	23.6655	16.27	21.4076	20.6048	21.0845	15.7385	20.5163	18.1986	11.6956	27.0467	1.62512	22.7278		1.3225	0.571969	24.5208	22.7376	18.3626	26.0637	19.856	20.1058	15.5761	22.6306	16.1713	8.11548	24.6639	0.760028
1.32417	17.8582	16.2057	12.6905	12.9915	14.6596	13.0847	9.1964	13.2129	8.29111	4.39895	17.3347	0.679763	0.828448		1.32417	1.11144	21.1998	18.2697	21.7704	21.2973	19.6992	15.7644	20.4721	15.9378	10.4003	25.1826	1.21811	27.3444		1.32417	0.870262	25.4419	23.5011	16.1312	26.3126	22.2053	19.095	16.7279	24.7887	16.8114	9.96969	26.9539	0.644452
1.32583	18.8123	13.7683	11.4061	15.7835	12.9281	15.6221	9.63473	12.7068	10.8051	4.32954	18.9068	0.802081	1.42097		1.32583	1.12402	21.0323	19.0696	21.1006	20.1328	18.2173	13.2466	22.8535	15.5769	10.1572	25.5031	0.983788	24.3538		1.32583	1.01469	24.3924	23.9979	18.9033	24.5656	19.5042	23.1253	15.327	23.831	14.9609	10.6397	25.4545	0.87558
1.3275	17.4201	16.3308	11.3913	15.6568	13.0849	16.0965	8.0233	12.5513	8.97511	4.24498	19.5458	1.61952	0.937986		1.3275	0.95862	22.5402	16.9443	22.3338	20.9152	21.9189	14.7132	23.428	16.0674	11.1995	22.5427	1.07153	26.3213		1.3275	0.759811	27.1568	23.412	19.8864	23.9929	19.1496	22.4404	14.9347	22.4367	13.7066	10.6369	22.5152	0.358989
1.32917	19.3013	14.5301	12.2042	17.6369	12.4679	13.0081	8.5174	15.1607	10.1983	4.47216	21.4063	1.36603	0.86216		1.32917	1.10387	23.3821	19.5332	21.1895	20.1911	20.3398	16.5104	22.0755	16.4965	11.632	24.1611	1.0128	25.0438		1.32917	0.813187	24.2095	24.6867	17.7053	22.4921	20.2902	21.9682	16.2582	21.2348	17.849	10.0744	23.7895	1.3872
1.33083	18.8711	15.427	12.2773	16.4872	12.7817	16.9295	8.84683	12.812	9.87114	4.56687	19.8856	1.37684	0.965272		1.33083	1.26268	23.0045	19.3925	22.7601	19.6736	19.9733	17.5139	20.984	15.0295	10.8466	21.5667	1.24724	26.7089		1.33083	0.648944	25.0554	23.27	19.4351	24.5491	18.425	20.9232	17.197	23.5853	14.6044	8.55793	22.8559	0.841217
1.3325	16.6918	13.8816	12.9966	16.7965	14.1925	16.5611	9.0824	14.6116	8.7838	4.9734	20.7741	1.33884	1.12589		1.3325	1.10449	22.1977	21.075	23.8024	19.8548	24.8459	14.8477	24.3978	17.7912	12.9069	25.8257	1.35799	25.3125		1.3325	0.439937	27.3897	23.652	20.8105	23.2598	19.7838	20.5182	17.4718	24.6573	17.5006	10.4714	24.0456	1.44099
1.33417	20.1605	18.2676	12.4663	17.0542	12.2009	15.6485	9.60291	14.8724	11.2403	4.02591	19.7129	1.02499	1.49704		1.33417	0.760388	23.6893	17.1427	23.8058	23.8589	20.0725	16.2636	20.8193	18.5905	11.7156	27.7427	1.61185	28.3327		1.33417	0.847477	25.1899	25.0086	17.4777	23.737	19.7145	22.0467	16.0657	22.5885	17.2774	9.72829	22.8151	1.95897
1.33583	18.473	14.9202	11.7954	13.2657	13.3778	14.7065	11.911	13.6616	11.3987	4.13206	19.9315	0.869274	1.87003		1.33583	0.822575	24.2723	21.0162	22.8594	21.7192	20.5414	17.5241	21.475	17.5856	11.6644	27.8216	1.69826	26.124		1.33583	2.3016	25.4313	24.4606	17.3121	25.9084	17.4264	20.4531	14.2601	24.8733	17.9741	7.19974	27.7962	0.371477
1.3375	18.581	15.626	10.7332	14.9679	11.1688	15.0207	10.3007	12.3347	10.3	4.51064	18.8941	1.51508	0.918389		1.3375	0.856014	22.7407	19.1589	22.0901	22.0123	20.2573	18.0008	21.9596	17.6615	11.8761	26.0467	1.46274	26.6814		1.3375	0.906959	25.9426	25.1288	21.1351	24.8789	23.8888	22.555	16.3069	25.6098	16.2475	10.7453	25.0248	1.2422
1.33917	18.1557	16.4425	13.369	17.9316	15.0174	16.8682	10.5994	13.7602	11.8524	3.38628	19.4226	0.727289	1.22781		1.33917	0.860813	22.6176	17.1012	20.7436	21.8304	24.3263	15.1405	21.9306	20.1024	11.7002	26.5634	1.59924	25.2066		1.33917	1.22783	25.5582	25.5208	18.2131	25.2881	22.892	23.9763	17.4218	25.8489	17.9828	10.3626	24.3866	1.31853
1.34083	19.6802	16.5338	13.8657	15.8284	12.7156	15.9222	8.90079	14.1031	9.10804	4.91022	20.7324	0.961644	1.13893		1.34083	0.641721	26.9	18.0563	21.5986	21.151	20.7786	16.1318	20.5478	19.6872	10.9431	26.3506	2.4469	25.4058		1.34083	0.78132	26.7877	23.061	19.1856	27.8789	19.9983	22.5996	17.3865	24.3827	17.9196	9.01116	22.271	1.82383
1.3425	19.3052	17.922	9.94766	16.406	13.0265	15.2126	12.1368	14.3591	11.0195	4.93101	22.1917	0.963737	1.12474		1.3425	0.96098	23.3151	18.0077	23.9902	22.8453	22.0846	16.2983	20.8499	17.3122	11.4812	26.0191	0.916636	26.1759		1.3425	1.41479	25.1951	25.9907	20.9475	26.9508	22.024	23.8634	16.0036	23.4805	18.655	11.3023	24.4246	1.37374
1.34417	18.4177	16.4077	13.733	17.5876	14.1411	14.0819	9.55081	12.5503	9.92953	4.21712	21.254	0.844286	1.43505		1.34417	1.45282	22.7813	17.8853	23.5793	19.6423	21.3054	18.0515	24.2484	19.1913	12.5865	27.0385	0.988194	25.5512		1.34417	0.366586	27.5748	26.0041	20.272	26.5195	21.6881	22.2045	16.8543	25.1406	19.2199	9.45899	23.0684	0.973078
1.34583	19.5429	17.3675	11.6401	17.2891	12.9749	15.9449	8.69223	16.9473	10.362	4.81814	20.1016	0.927357	0.871043		1.34583	0.938258	25.355	17.2962	23.7845	21.1319	24.4575	17.57	25.4792	18.9915	14.0392	27.2753	1.49152	26.4751		1.34583	1.4434	24.8883	24.2381	21.1495	25.6641	21.4721	23.6259	17.5203	26.1297	14.8641	9.7623	24.4625	1.64683
1.3475	19.4799	16.8146	13.444	14.4134	14.0337	17.1716	10.6432	13.9421	12.2507	5.46642	20.4435	0.884545	1.17057		1.3475	0.77186	24.062	20.1677	22.2178	21.6718	19.6309	15.5794	20.8601	18.2752	12.0422	26.1922	1.19808	25.0042		1.3475	1.40271	27.23	25.9519	18.6683	26.0367	22.7244	22.9262	16.0522	25.448	18.4148	13.1356	23.283	0.660549
1.34917	18.8603	17.1468	12.6473	17.3604	13.2151	17.4369	10.4564	14.6181	10.5051	5.0054	20.2739	1.41053	0.842278		1.34917	0.941008	24.7157	18.9011	21.6664	22.399	22.0925	14.7865	21.41	17.2915	12.4796	28.5591	1.60202	28.3933		1.34917	0.777723	26.8717	26.2632	17.409	27.2102	23.3652	22.4959	16.0117	25.065	16.9624	10.4843	26.4864	1.02626
1.35083	20.2312	16.3343	14.2428	17.4172	13.4953	15.183	10.8689	14.3837	10.6847	5.45005	20.713	1.52308	0.95513		1.35083	0.70681	26.2553	17.6247	23.8375	22.5654	21.1093	16.4466	21.5409	16.4636	13.482	24.9962	1.74301	26.7517		1.35083	1.13078	27.8715	25.3851	20.6751	25.5962	21.406	22.7782	15.1126	24.4838	18.2934	10.7553	26.1037	1.49198
1.3525	18.4255	16.6913	11.9926	17.9118	16.7402	16.5347	9.1233	12.242	13.2842	5.17671	19.8386	0.870379	0.972639		1.3525	0.931099	24.91	18.8645	22.5327	24.0723	23.5413	18.247	22.0985	19.2402	13.8989	29.0951	0.837597	26.6412		1.3525	0.823045	25.6371	26.6825	18.8934	26.172	20.4485	20.995	17.4082	27.1727	18.1909	8.75115	23.8697	1.5345
1.35417	17.4655	15.9572	13.7193	16.6566	14.143	16.2727	9.78771	13.6475	9.18567	5.83283	20.6989	0.834798	0.976272		1.35417	1.4245	27.7276	18.7607	24.1076	24.0126	22.7838	17.1703	23.9176	18.0986	13.0586	27.2782	0.551382	24.7023		1.35417	1.11672	24.1866	26.2085	20.8084	24.7956	19.264	23.6719	18.7669	25.094	17.9764	12.1215	24.3103	0.874782
1.35583	18.8709	15.2934	15.0948	17.9592	15.9642	17.6235	12.5444	15.1147	10.8682	4.90016	19.5692	1.19881	0.958998		1.35583	0.379363	25.3163	19.8793	23.3078	18.9693	21.8434	14.7334	23.7521	18.3422	12.5518	27.6608	0.840466	23.322		1.35583	0.933727	27.3537	25.3664	19.837	25.7405	20.2717	21.4931	15.0614	22.9876	19.8369	13.3105	27.2805	1.21801
1.3575	20.4829	17.5931	11.7051	18.3515	13.302	18.0348	10.5288	12.8688	11.3415	5.24816	23.2689	1.47103	1.02125		1.3575	0.771911	24.827	19.6988	24.375	21.7953	22.1349	17.6009	20.4477	16.914	11.6781	23.4651	1.80496	25.265		1.3575	1.24463	25.078	27.9099	18.1083	24.597	19.9485	23.4612	18.6788	28.6215	18.4427	12.0538	25.9467	0.582685
1.35917	18.2726	17.5486	14.4594	17.5247	15.6426	15.9025	11.4619	15.7291	10.381	4.48524	22.0478	0.903265	0.891111		1.35917	1.52933	24.8702	19.1944	24.2631	22.1421	24.2141	16.2325	22.1055	21.4986	12.0318	27.3882	1.42531	28.1743		1.35917	1.2747	27.7004	25.5881	18.7675	23.9985	21.718	21.7148	18.7566	27.9379	20.1953	12.5347	27.1071	1.09072
1.36083	16.8936	15.5182	13.5982	20.9789	14.4957	19.8425	10.6376	15.402	10.7731	4.9211	20.6592	1.31536	0.98727		1.36083	0.882768	26.938	21.3487	24.075	22.2422	24.1717	17.8394	23.3617	16.7565	10.3063	25.8775	1.6141	27.925		1.36083	1.32931	30.93	24.6195	18.863	27.1512	20.6005	23.3007	17.5282	23.5428	17.7381	10.6565	25.2326	0.75192
1.3625	20.5386	17.5211	13.4408	19.0651	15.3341	17.5685	10.0533	15.619	11.8754	5.2137	21.8943	0.792919	1.52816		1.3625	1.0815	26.7561	18.9824	25.3152	22.2452	22.0556	17.5397	23.4213	18.8345	14.6139	26.3007	1.16851	29.1928		1.3625	1.30545	28.6603	26.0145	22.3893	25.1572	22.243	22.7139	16.4665	27.8859	18.757	12.1492	26.1058	1.76708
1.36417	19.4137	20.8614	16.8269	17.11	12.7709	16.7624	10.9404	14.1619	11.2688	5.48424	23.8779	0.598086	1.53037		1.36417	0.589597	25.5723	18.6562	23.189	22.5983	21.218	18.9005	22.8046	20.0648	11.1638	27.5088	1.93876	25.6885		1.36417	1.18811	27.2845	25.972	23.1506	24.9309	20.653	23.13	18.6373	25.1701	19.7343	12.7931	27.678	2.08973
1.36583	19.262	18.3551	10.798	18.197	15.6407	18.5369	11.0185	15.6119	10.0509	5.13835	20.2915	0.748359	0.857812		1.36583	0.795703	26.3382	21.7958	23.9938	23.8776	22.5613	18.2818	25.849	17.2678	13.2647	25.9659	1.68473	32.2034		1.36583	1.13618	25.3115	28.2347	19.8947	25.9895	19.4312	22.7233	19.2696	24.179	19.3997	11.7165	27.0874	1.46542
1.3675	21.0965	20.3735	12.4648	18.1852	16.155	17.6786	12.7101	15.1057	13.779	4.80111	20.7808	0.741354	1.09552		1.3675	0.837521	24.1462	20.4799	27.0454	25.2084	24.9158	18.2601	23.8335	22.4159	13.8704	28.2653	1.24743	28.231		1.3675	1.16178	25.9921	26.3993	19.8804	26.2491	23.8541	24.026	18.8734	24.9298	18.8855	12.8971	26.8223	1.80173
1.36917	18.6384	16.9082	13.6326	15.1579	15.086	19.7889	10.774	17.3252	11.3888	5.31861	20.9436	0.753417	0.915517		1.36917	0.878978	25.0734	22.6444	26.2948	24.2164	23.7906	16.6161	24.1115	18.5896	12.0359	26.3538	0.626121	27.1792		1.36917	0.827796	27.8039	29.0157	21.5383	27.2397	23.625	22.5428	17.6637	25.7528	19.2888	11.144	26.2738	1.67934
1.37083	22.7864	19.4342	14.8734	18.0021	14.8275	16.0912	10.5371	15.0523	12.3468	7.96489	22.5218	0.301121	1.14481		1.37083	1.05335	25.2928	19.8914	23.4297	23.2568	21.4333	18.3768	21.5386	19.7117	12.6273	26.6623	1.65793	28.7376		1.37083	0.699515	28.4088	28.9038	21.7895	29.4457	21.7189	26.4289	17.897	26.7404	18.583	11.8699	26.7085	0.588061
1.3725	19.4699	15.4027	15.2611	18.6784	18.3477	15.0148	11.6282	15.2969	10.359	6.17821	22.7027	0.805225	0.738428		1.3725	1.31958	27.5635	21.7819	24.794	23.3188	22.4149	16.9203	21.5772	19.5494	12.9709	27.3599	1.31519	26.26		1.3725	0.581903	26.4574	26.942	20.0335	25.2268	21.3809	21.2601	16.5354	26.6309	18.9473	10.8858	26.4163	1.4102
1.37417	18.0981	18.3349	13.5033	15.6044	15.6343	16.9937	10.6836	16.746	12.0234	6.01833	20.6511	0.656498	0.969013		1.37417	1.14808	26.9433	20.6832	24.4782	22.4045	20.6933	19.1706	23.4035	18.3028	12.9572	28.5118	1.27066	25.4718		1.37417	0.953014	29.1331	26.3791	20.1226	25.858	20.3861	23.7436	18.1845	27.4804	19.9336	10.7607	25.4607	0.820625
1.37583	22.2091	15.6153	14.5769	19.3027	14.5374	17.6924	10.8831	16.532	12.8551	4.78509	22.5211	0.750976	1.17733		1.37583	0.903608	29.0523	20.6659	25.1451	24.0338	22.7562	17.5817	26.1464	19.1967	14.8898	29.2004	1.92702	30.3335		1.37583	0.890994	26.0773	24.9766	21.2145	26.6703	22.8405	26.3732	17.8708	24.5859	20.0549	12.1922	27.8767	0.587337
1.3775	21.1183	15.5366	17.5067	16.9944	15.8685	16.882	12.9433	14.2316	12.0457	5.53189	23.2829	1.2791	1.09341		1.3775	1.0354	25.8432	21.6896	23.5954	24.1956	24.2723	19.3063	26.6352	21.7097	11.9919	29.0218	1.96281	28.8893		1.3775	0.993093	29.5032	24.8275	21.2297	26.6229	20.8399	24.2664	19.7648	28.4795	21.496	11.8288	28.1663	1.68079
1.37917	18.8645	17.1138	14.5808	17.8611	15.5289	19.3268	12.1617	17.4865	12.2662	5.40052	22.5227	0.758791	0.757248		1.37917	1.00507	26.1715	20.913	24.7656	23.2637	25.4983	18.3606	23.3695	20.3922	13.667	27.2002	0.758943	26.97		1.37917	1.34947	29.1135	25.5266	20.4395	28.8838	22.9244	25.4446	17.8238	27.8	19.1073	12.859	29.06	1.23553
1.38083	19.5145	18.0266	14.5654	17.1229	17.3719	16.1734	13.5515	15.1864	12.6016	5.93502	23.7181	0.617087	1.18823		1.38083	0.650153	26.6621	19.8861	26.4694	21.7169	22.425	17.928	22.9773	19.6917	14.2963	29.1546	1.05016	28.8394		1.38083	0.846967	26.0555	30.9235	21.2926	27.7867	22.8416	25.2864	19.1609	27.4437	19.434	12.173	27.6886	1.12485
1.3825	19.5149	17.586	14.2713	15.4851	16.737	18.8526	13.3737	15.6653	12.4986	5.70576	20.8987	1.11315	0.646803		1.3825	1.07105	25.8757	22.4513	24.8211	24.1679	25.9194	20.1483	25.3923	18.0641	14.1344	29.16	1.21225	28.8443		1.3825	1.19319	27.5458	27.5443	22.2523	27.6902	21.9892	25.0979	20.0728	28.0093	19.0805	11.9077	28.1577	1.34742
1.38417	19.7171	17.5507	14.8545	19.0919	16.2929	16.6325	11.6795	16.3767	9.80989	5.91813	20.955	0.914504	1.01383		1.38417	2.27314	26.6951	19.6103	25.3103	22.0674	22.8612	18.6406	23.2567	19.8009	15.535	28.5647	1.51477	29.4438		1.38417	1.00424	26.5089	28.1017	22.0643	29.292	22.989	26.4961	18.7574	25.7213	21.2936	11.7415	28.5112	1.51306
1.38583	21.6805	19.1371	15.5309	18.8834	15.8137	20.7653	11.0234	18.2619	12.486	6.43768	21.5639	1.01628	0.853074		1.38583	0.971167	24.199	22.0441	25.2645	25.6142	26.3481	17.5823	24.0192	20.1594	15.8248	28.7044	1.42161	27.5588		1.38583	0.966895	29.4919	27.0048	20.2679	27.7571	21.3958	23.9233	20.2478	27.6569	19.2567	12.6364	30.2519	1.14394
1.3875	22.557	16.689	13.3423	17.4221	16.8113	17.3529	12.3766	14.5518	13.0247	4.92148	21.9814	1.14577	1.02544		1.3875	1.01696	26.4284	22.2154	30.3715	22.7889	26.6286	18.081	26.0947	22.1572	12.8625	29.94	1.50964	30.8148		1.3875	1.38852	28.2629	27.6783	18.6131	26.7228	22.5698	26.613	19.4115	26.5633	19.9561	13.0121	26.1977	0.472754
1.38917	20.8263	20.5314	15.7488	21.2697	16.9291	18.5181	12.116	15.0267	12.845	6.40854	23.5571	0.791853	1.0068		1.38917	0.302637	25.5425	22.2078	26.6145	24.3849	22.4165	19.2848	25.615	20.8119	15.0545	28.9609	1.26781	30.0056		1.38917	0.930707	29.4845	30.9703	20.7276	24.3936	24.1768	23.2682	20.1427	29.0747	18.7521	12.2457	29.9335	0.71128
1.39083	20.9049	18.7596	16.5953	18.2016	17.9102	19.7301	13.2594	17.2499	11.0406	6.5905	25.312	1.1833	1.37058		1.39083	1.31981	26.5016	21.1464	25.7401	24.838	25.5456	21.9176	23.9731	21.8289	14.2143	27.7034	0.835675	31.4615		1.39083	1.22845	26.8867	25.8687	22.3341	26.3789	23.8527	24.2801	20.4006	27.8278	21.3437	13.0177	27.2547	1.06442
1.3925	21.0119	19.1139	14.6443	18.2162	16.3081	18.662	11.3079	15.856	13.5346	5.51778	21.1965	1.61238	0.936636		1.3925	0.984252	27.1413	20.3504	23.1876	24.3525	25.1526	19.408	23.9771	21.3658	13.8359	29.2842	1.21071	26.9153		1.3925	0.624874	27.0431	27.957	21.8214	27.9568	25.5366	27.615	19.4661	27.3934	18.2318	12.1141	24.837	0.238559
1.39417	22.7777	19.7248	14.49	17.2823	14.6976	18.2169	12.2534	16.2761	14.5263	5.1716	22.4384	1.09145	0.817802		1.39417	1.03667	29.6008	20.9056	26.166	26.0083	24.0582	18.3802	27.2312	20.6597	14.9968	26.0427	0.834671	26.2693		1.39417	0.765228	30.0278	28.7401	21.3749	29.1673	22.5651	23.9719	22.4341	30.0576	19.9368	14.8825	27.2832	0.326344
1.39583	20.4696	18.7635	13.7269	17.813	17.5572	19.0117	12.6133	16.76	12.1822	7.02576	22.6029	1.03139	0.900302		1.39583	1.17914	25.1189	24.3705	25.9264	23.7805	29.3487	21.6774	24.434	20.2906	14.5498	28.6354	1.47971	28.2564		1.39583	1.49126	26.4868	28.1561	20.2217	27.1628	23.3413	22.7443	20.2211	30.2646	21.8592	13.4604	29.0268	1.30152
1.3975	22.4074	19.3073	15.1315	19.4193	15.5488	18.4499	10.3917	18.0505	12.6233	5.8393	23.9084	1.28576	1.4705		1.3975	1.05044	27.9569	23.0101	24.7542	24.5075	25.3147	19.0269	25.7431	22.0755	16.267	30.0925	0.788608	27.154		1.3975	2.2265	29.1488	26.1946	21.1298	27.4106	24.6777	25.7853	20.5672	25.9193	23.2527	12.9358	28.2715	1.38951
1.39917	21.7466	19.0322	14.3519	18.7244	16.3799	17.2566	12.0809	16.802	12.9177	5.98309	23.3471	1.08066	0.700979		1.39917	0.851231	27.8214	23.2633	24.4443	24.565	25.051	21.4524	24.1382	20.916	14.0692	29.3763	1.13432	29.4075		1.39917	2.3137	28.5339	28.19	24.3665	28.1799	24.9959	24.4077	20.1527	27.3091	19.293	11.6169	26.8762	1.21875
1.40083	20.9799	20.4632	17.3681	19.675	17.1801	15.8909	12.4302	13.3564	10.8772	6.74761	22.8723	1.37413	0.83042		1.40083	1.09819	27.2966	24.3578	22.5784	25.1665	24.5756	19.9927	25.4715	24.6373	13.7236	28.689	1.0412	30.8209		1.40083	1.36383	29.9236	27.0322	21.847	28.5821	26.563	26.4261	21.9123	26.6607	22.3947	12.5813	29.0904	0.700497
1.4025	18.9674	19.7616	15.2457	19.0521	17.6788	18.029	12.7271	18.9285	13.3147	7.5188	22.1779	1.20179	1.02292		1.4025	0.611567	27.9209	23.5379	25.8484	25.665	26.6503	19.8884	25.3869	22.8371	16.5761	28.8423	2.17786	32.7402		1.4025	1.38565	27.708	26.3695	20.1807	26.2201	21.9147	27.0021	18.6879	27.3796	22.4292	12.2807	27.3896	0.953293
1.40417	21.5862	19.0362	16.6325	20.248	15.9048	19.3469	12.9045	16.4151	13.0155	7.50141	22.5148	1.10701	0.693554		1.40417	1.10449	27.813	23.4089	27.1757	24.8803	25.2227	20.8693	27.2717	19.7549	13.8516	28.2656	1.66953	28.8224		1.40417	0.858498	28.0376	29.0837	21.6866	28.2929	24.3445	24.8959	21.4439	28.9774	22.2988	12.6471	28.5552	1.11779
1.40583	21.7831	17.876	12.8212	18.251	16.5753	17.3685	11.9731	17.7803	12.0325	6.57881	24.158	0.971922	0.795459		1.40583	1.28689	28.0424	22.3695	26.3728	24.212	27.8884	18.2383	23.8244	20.0616	13.4537	29.9918	1.16333	30.98		1.40583	0.330506	27.654	28.2639	19.6051	28.9019	21.3661	25.2802	18.6801	26.3912	23.0997	14.1534	28.3276	1.19592
1.4075	19.8155	18.6668	16.1482	18.8643	16.1599	17.4895	12.0229	16.1832	14.7749	4.86959	23.6281	1.28082	0.826069		1.4075	0.77534	31.0042	22.1088	27.4197	24.0016	28.1828	19.9884	23.5794	17.8238	15.2871	29.8912	1.392	28.9161		1.4075	1.03297	29.8076	26.9825	23.539	27.9202	22.7822	22.8629	21.6556	28.8547	23.3424	15.546	26.2367	0.808007
1.40917	24.5661	20.5888	18.0139	20.2607	17.0189	18.7764	13.7718	15.5862	15.0034	6.80956	23.8188	0.768525	0.989995		1.40917	0.523001	29.1026	22.1091	25.8387	25.6735	25.1468	21.7414	25.625	21.3626	14.7827	30.065	1.16028	26.8248		1.40917	0.710922	31.0105	29.7903	22.2587	29.2579	21.9812	23.9886	18.3695	28.7678	22.7137	13.4021	28.3778	1.62937
1.41083	19.232	20.5224	17.4258	19.9878	18.6471	21.8929	14.0407	16.583	13.7965	6.96538	25.033	1.15519	0.809786		1.41083	1.37189	28.2926	22.0623	26.1734	25.9167	24.903	21.2363	24.4022	20.2703	15.2067	28.9493	1.08416	31.5476		1.41083	0.700206	31.4165	29.3201	19.8646	26.8064	25.3563	26.5265	19.0248	27.3001	21.5012	11.5974	25.9219	0.950585
1.4125	20.1972	19.5627	13.1823	21.9259	17.166	19.5716	12.6564	16.4422	13.208	6.71691	25.6046	0.942265	0.932229		1.4125	0.509197	27.5536	23.2994	25.1305	22.8862	24.0048	21.5172	26.926	21.3827	16.6635	29.7407	0.92864	32.0324		1.4125	1.64604	28.9659	28.1939	22.6298	29.8848	22.1339	25.0637	20.7636	29.9168	22.2563	14.3056	26.2566	0.961461
1.41417	22.1314	19.2007	14.9603	17.6612	15.8734	18.3753	13.7521	17.5468	13.4921	6.68452	25.5161	0.994208	1.41911		1.41417	1.49113	28.7006	21.0927	27.071	26.3417	27.5511	23.0493	26.8395	23.3147	13.7837	29.3742	0.766674	30.5336		1.41417	1.23751	28.688	28.7499	20.5688	28.2704	24.5051	26.7451	21.7864	30.6437	21.0245	14.3456	28.5262	1.27058
1.41583	23.2385	20.5154	16.0996	20.182	17.139	19.2055	15.9865	18.5256	13.4023	5.58879	25.0714	0.822247	0.998835		1.41583	0.794469	25.5974	22.5723	30.0132	26.3296	26.9734	21.5601	28.3443	20.811	15.6905	29.6301	1.17735	29.1439		1.41583	1.07301	30.3463	28.3368	23.3299	27.7476	23.2716	26.2706	18.7736	30.5449	23.6135	12.7887	28.7577	1.16567
1.4175	20.6102	20.5994	17.214	20.6362	16.2358	18.7557	12.352	14.3022	12.6532	7.21759	24.7176	1.11457	0.638882		1.4175	1.08501	28.0734	24.7954	26.9196	24.0568	24.1256	18.7075	27.2582	22.6137	14.3843	29.9603	1.27607	31.4381		1.4175	0.859631	31.9348	29.1727	20.9351	29.0664	22.7254	26.8589	21.5679	28.5972	22.8436	14.8042	28.3536	1.34306
1.41917	21.7078	21.4401	15.8613	19.2857	19.4337	19.1356	14.2827	16.9484	12.1506	7.30397	24.0815	0.898396	1.16432		1.41917	0.894416	25.5008	22.7093	28.8448	22.6743	26.2013	20.7922	26.664	20.9784	15.0841	29.5391	1.25743	31.084		1.41917	0.415369	29.1277	26.3333	23.838	28.3122	26.0666	26.249	20.6561	27.8971	24.3213	13.2386	28.6278	0.812135
1.42083	21.6129	20.4341	15.9666	19.7857	17.3094	19.9184	12.243	17.8119	14.6003	7.95767	21.5676	1.48816	0.636286		1.42083	0.934905	26.9567	24.0634	30.8933	25.557	26.3767	19.1934	25.405	22.4186	13.8674	28.4339	1.21488	31.4165		1.42083	1.06319	26.8053	28.7462	25.5481	31.0672	24.1309	23.4078	20.3659	30.5447	21.3443	13.4786	28.5798	0.379076
1.4225	23.5009	20.1123	17.0959	19.8211	14.9402	20.8614	13.2884	16.5788	15.1709	6.79928	23.3034	1.08069	0.9832		1.4225	1.05733	29.5373	23.9269	26.2152	25.3749	27.4202	20.9164	27.0435	21.3534	13.6837	34.6985	0.942814	28.906		1.4225	1.04941	28.0628	29.5425	21.5485	27.4405	22.6236	27.2016	19.3617	28.9605	20.5965	16.286	28.3176	0.731002
1.42417	20.6842	19.1218	15.432	21.2587	18.247	20.2382	14.0752	16.3235	12.7097	6.51031	24.0197	0.958324	0.583018		1.42417	1.43013	28.4508	24.4367	27.4811	26.675	28.6471	22.3762	25.8903	22.3979	17.4048	29.5729	1.18422	32.1179		1.42417	1.1948	31.0235	29.2914	24.7177	27.9931	24.4718	25.1388	22.2073	29.3211	23.9913	14.0689	27.8176	0.855248
1.42583	22.9175	19.3434	17.095	20.5072	18.0539	17.574	13.4006	16.4467	13.7112	6.46064	24.8132	0.754392	1.12172		1.42583	1.02468	26.1986	21.1463	27.7797	23.979	26.0706	22.3349	25.1513	23.9721	16.2599	28.2876	0.765882	29.8687		1.42583	1.11254	29.6883	25.9449	22.4784	29.0471	22.6723	26.1502	20.2992	28.0131	20.2565	14.7496	27.8274	2.05791
1.4275	21.8645	20.4246	15.0622	22.0616	16.9191	20.0831	13.187	16.8487	13.3932	6.47935	23.463	0.704955	0.898069		1.4275	1.13771	29.8385	23.447	27.3608	25.5753	27.8005	20.9392	26.6381	21.259	16.6004	27.2028	1.74354	28.4814		1.4275	0.748602	29.914	27.2612	25.152	28.0758	24.3918	25.8098	20.4237	29.6719	21.3003	16.0985	29.8932	1.94466
1.42917	22.4879	20.6209	17.0293	20.0769	17.0177	19.039	13.8183	18.1826	13.8352	7.41776	24.3609	1.07025	0.994819		1.42917	1.09859	30.6481	23.2281	28.3263	25.3282	29.2402	20.9583	25.065	21.2682	12.7792	30.8358	1.52795	29.4561		1.42917	0.728654	27.7277	28.4896	22.478	31.056	25.4373	24.6566	21.3513	32.7248	24.1037	15.7058	28.0936	1.406
1.43083	21.853	21.566	17.3307	19.568	17.7283	19.2411	12.9068	17.5471	13.9964	8.62397	25.8159	1.48749	0.871395		1.43083	1.33381	29.6595	24.1101	27.4916	25.698	26.4483	22.1401	28.3548	21.1132	14.0543	29.9925	1.38046	28.5421		1.43083	0.773146	29.6925	30.0526	23.0664	28.471	23.2454	26.4478	21.7952	30.0462	23.3214	14.2765	30.3963	0.643087
1.4325	20.937	20.6256	18.6277	18.8549	18.1921	19.9698	12.337	17.9846	14.3704	8.25787	22.7048	0.571525	0.919842		1.4325	1.77491	30.415	22.3628	27.5466	27.1826	29.8896	21.2205	26.7477	22.2082	16.1311	30.846	0.53155	30.667		1.4325	0.909757	28.6731	26.6101	23.6655	29.1447	23.9196	26.2787	23.2911	26.34	20.5493	14.3252	28.7962	0.956206
1.43417	19.9218	19.9185	16.5016	20.263	19.093	20.3633	14.2869	17.5862	15.059	7.43344	23.707	0.982524	0.694971		1.43417	0.862627	27.5872	24.5762	29.9298	26.2186	25.8645	22.3096	23.109	22.8831	15.0997	33.1354	1.14711	30.995		1.43417	0.953733	30.1472	26.964	24.5087	28.82	24.8859	28.2	22.4241	31.4721	21.7585	15.5759	29.6157	1.18626
1.43583	22.0252	18.2112	16.9834	20.9131	18.1549	19.8298	14.4487	18.566	12.8872	5.78857	24.9729	0.734151	0.570005		1.43583	0.703854	27.7923	24.3945	26.878	22.3272	27.9097	21.7849	26.5879	23.8853	18.9107	32.7762	1.76884	31.802		1.43583	0.819182	32.2043	29.8489	23.0969	30.4243	23.7205	27.2604	23.3943	29.4245	21.3332	12.6658	24.5235	2.16257
1.4375	23.1784	19.1683	15.3832	19.8214	17.4269	20.2481	13.9211	17.1027	15.8097	6.97099	24.2377	0.954852	0.793174		1.4375	1.1355	27.8364	24.7623	25.0632	23.4207	27.4017	22.9762	26.9713	21.4569	17.5414	30.8225	1.87495	29.0752		1.4375	0.901059	30.044	31.6701	23.7319	29.8941	24.3595	26.7866	23.6509	28.3702	23.2978	12.8692	29.1614	1.3548
1.43917	20.4142	20.9566	17.3765	21.9655	19.0001	18.5058	14.2512	19.3754	14.2667	7.66431	23.6827	0.953151	0.948567		1.43917	0.588025	29.0584	24.5032	27.4342	26.6048	26.7314	22.5479	27.5532	21.0515	16.8215	30.7362	1.74088	30.5659		1.43917	1.39956	30.1897	29.5704	24.0208	28.9326	24.7551	27.1979	22.3503	30.6596	24.912	14.1313	27.9975	0.812521
1.44083	22.1261	20.2764	17.4514	18.6349	16.6901	21.423	13.5492	18.5412	14.3478	8.50646	23.7295	1.43596	1.22018		1.44083	1.17932	30.7367	25.1953	26.7049	26.1725	28.0472	21.3053	26.3535	21.6651	18.6654	32.4914	1.65901	30.8469		1.44083	0.862649	31.455	28.4772	19.65	29.0087	25.307	26.7238	20.7035	31.1346	21.7472	14.1401	29.2218	1.30603
1.4425	22.8195	19.6174	16.0244	20.2451	18.9018	21.3525	13.4241	17.8334	12.7345	6.72241	24.7868	1.26215	0.781085		1.4425	0.831328	28.3738	22.6622	25.8879	22.958	26.5892	23.1322	26.4849	22.1892	18.0162	31.2858	1.26886	32.1304		1.4425	1.11739	31.1092	27.356	23.8766	29.722	27.2849	25.4644	23.7987	31.6926	22.8571	14.9507	28.5453	1.82085
1.44417	22.8196	23.3735	17.7285	21.1338	20.3677	19.8775	14.591	17.697	13.8383	7.06384	23.6487	1.29256	0.872401		1.44417	0.771274	25.0928	22.7033	26.3163	26.4067	27.0135	23.0958	27.9516	23.4424	14.9175	31.8931	1.55948	32.4303		1.44417	1.15365	29.6729	29.0815	25.4065	27.0019	25.5339	24.9489	21.8188	28.4238	20.4031	13.9703	29.2174	1.31059
1.44583	23.2924	20.7974	16.4771	21.0058	18.6062	21.1465	14.6481	18.7638	14.7528	8.53907	26.3092	0.683585	0.9748		1.44583	0.948627	29.1498	24.2542	28.2713	25.76	28.9166	19.7389	28.4155	21.9232	15.5566	30.166	1.46043	34.2286		1.44583	0.788074	32.037	29.3517	20.8819	30.3928	25.9277	28.3214	20.7905	29.9111	23.4867	14.0115	26.9916	0.643455
1.4475	23.7569	19.4645	16.3211	20.3315	18.8937	19.4175	14.1618	19.0833	14.0784	6.79772	23.1494	1.22575	1.14204		1.4475	0.695199	33.0724	27.0265	29.1161	28.5874	26.8996	22.6212	26.6964	24.5511	16.677	30.2346	1.16055	32.3338		1.4475	1.44859	30.3043	28.0024	23.4508	31.9642	25.725	26.6222	22.4503	29.7767	25.0695	15.9786	29.0192	0.681361
1.44917	20.8705	22.7337	16.2249	20.2645	15.6239	19.9491	14.6711	17.2266	14.54	9.21025	25.2387	1.24802	0.602358		1.44917	0.894591	28.3713	23.9809	29.0952	27.1811	27.4759	22.5228	29.4746	24.0529	16.8223	33.058	1.49724	28.4737		1.44917	1.13641	30.2759	28.229	26.5078	34.4034	24.0727	28.2567	21.512	30.1887	23.8662	17.3748	28.3548	1.31762
1.45083	23.6222	20.5721	17.3858	22.0432	19.0876	22.3546	14.7974	19.0372	15.2049	8.22872	23.3829	1.50725	1.36246		1.45083	1.30237	30.2252	24.2006	29.4837	27.9698	27.2708	19.4666	28.3475	23.1626	17.9251	32.0222	1.30491	34.1407		1.45083	1.59136	32.5826	29.5579	24.3146	31.5868	23.5375	26.2231	21.0253	29.653	20.9622	16.2063	27.4307	0.738869
1.4525	21.0289	21.5507	19.3934	19.0488	19.1892	20.4456	15.797	16.6461	15.8603	7.59154	28.3894	0.59058	0.957735		1.4525	0.822297	28.8993	24.7384	29.8122	27.9695	28.1737	20.6771	25.1417	22.0753	16.1412	33.1262	1.76243	30.5149		1.4525	1.42701	31.0849	31.3576	23.4684	31.7818	22.9446	26.0906	21.1679	30.7798	20.3322	16.7122	29.7036	1.55293
1.45417	23.217	21.4818	19.1237	22.2035	19.4059	21.6673	16.1768	16.3526	14.7886	7.57005	24.2731	1.00406	0.633834		1.45417	1.46039	28.4149	27.2571	26.4432	25.2512	26.2792	21.9227	27.6991	23.3998	17.0285	31.6369	1.76819	32.8278		1.45417	1.78575	33.846	28.4322	25.5157	30.7365	24.6848	29.2064	21.9945	29.1458	23.9809	14.9918	28.3009	1.10071
1.45583	23.7036	22.4585	17.181	22.7311	18.3732	21.1962	14.712	19.6837	15.5328	7.19691	23.7409	0.999128	0.798571		1.45583	1.28252	25.9547	23.6988	25.9885	28.8957	28.4596	19.5978	29.6279	24.8971	15.398	32.6464	0.575279	31.6638		1.45583	1.40706	29.9589	30.3783	21.885	28.3706	26.8069	25.2714	21.6993	28.4741	24.0116	16.0943	28.8496	0.693444
1.4575	22.3362	22.8935	18.2212	19.5547	18.3625	20.9362	14.5559	19.9942	14.8021	6.50462	26.6299	0.873716	1.13849		1.4575	0.823967	30.9596	24.5886	29.8303	25.5116	27.4106	22.8896	27.4336	24.5517	17.841	33.252	1.4126	31.5163		1.4575	0.922331	33.5285	28.0372	23.655	30.9414	28.3318	28.2132	23.8885	34.675	24.8752	14.7711	29.5237	1.44998
1.45917	23.425	21.9951	18.0275	21.5288	17.9288	21.1844	14.6779	19.4936	15.2272	8.18009	25.7838	0.464763	0.863328		1.45917	1.25609	28.17	23.3313	28.4582	25.6332	29.3869	24.8838	28.4566	22.0395	18.1777	31.2067	1.3294	30.9931		1.45917	0.695184	29.0581	28.9918	25.4731	31.3005	21.8815	27.7073	23.5952	29.0351	21.6421	16.1982	28.6205	1.25462
1.46083	24.952	20.515	17.6182	20.8299	18.9841	20.0414	15.5872	18.297	14.889	6.92182	25.5798	0.702044	0.978099		1.46083	0.672247	27.9712	26.8242	32.0805	27.9095	26.3738	23.1198	29.1645	24.9471	19.2873	30.2833	1.14916	31.7251		1.46083	0.811266	30.2727	29.0529	24.3086	31.7103	26.5783	26.5965	22.2478	32.1689	23.1559	14.5989	29.799	0.941077
1.4625	21.6897	18.5608	18.2254	21.8679	20.0175	22.0013	15.2367	18.6224	15.4648	8.62653	23.9425	0.815503	0.342407		1.4625	0.82301	32.0563	24.1378	25.3895	25.3121	29.9533	20.8092	28.5761	21.1768	17.4758	32.2094	1.6402	28.7424		1.4625	1.24253	32.0791	30.7563	25.2631	31.7769	24.481	28.7017	22.5945	28.1571	24.8502	16.7866	29.9581	1.41843
1.46417	22.4084	21.6384	18.4689	21.9554	18.6718	20.8939	15.8809	18.3951	13.019	8.87173	24.857	1.00987	0.873635		1.46417	0.674001	27.0462	25.099	28.1614	26.8541	29.5506	22.5484	26.1256	24.0941	17.8919	32.5249	1.27662	32.4101		1.46417	1.11302	32.283	31.7581	25.1582	33.1015	25.8624	28.934	20.7652	30.9815	23.9453	15.5761	31.5764	1.05541
1.46583	22.9143	19.5282	18.4104	20.0466	18.803	20.9357	15.1253	19.2555	14.5007	8.61634	27.9165	1.20074	0.590057		1.46583	0.95448	32.5779	24.8401	30.5729	27.7565	28.3155	23.1333	29.2827	22.94	16.1923	29.9662	1.20813	32.9765		1.46583	1.02093	30.5025	29.878	23.6594	30.4993	26.3236	27.4939	20.2892	32.5936	26.4344	18.2773	30.2984	0.858776
1.4675	23.042	21.4802	18.579	20.3148	19.5816	18.6132	13.7839	16.0105	15.5736	7.90457	28.9274	0.986151	0.705672		1.4675	1.03874	34.0893	25.3202	27.9616	26.5127	27.8333	24.4385	27.0449	24.7686	19.3491	29.9529	0.826251	35.2565		1.4675	0.773329	28.9883	28.2306	25.3057	33.2943	27.2933	26.1527	25.5477	32.1661	23.4558	15.727	30.418	1.50107
1.46917	24.2176	23.1423	17.3486	18.3117	21.0308	20.4877	15.7947	18.4457	17.3741	8.04909	28.6133	0.906157	1.05229		1.46917	1.18559	29.0333	23.0309	30.0966	29.9905	26.5215	23.3254	29.244	23.5932	15.6011	30.3069	1.52235	31.677		1.46917	1.17169	30.3102	29.6398	23.4381	31.5808	27.6768	27.9287	23.8007	29.1575	23.1538	15.5373	31.3229	0.98755
1.47083	24.9471	20.6982	20.3455	20.4095	19.119	21.61	16.5257	19.602	14.0777	8.91658	23.922	1.11621	0.900241		1.47083	0.799481	31.9995	24.9927	27.9951	26.7838	27.0063	25.4646	31.9554	24.7755	16.5979	31.6028	1.16049	33.3155		1.47083	0.979474	30.6362	29.2036	25.1995	28.803	27.4636	24.9773	22.0587	30.0004	22.89	15.8064	28.6405	0.405691
1.4725	23.0816	21.904	18.2641	23.3537	17.3447	21.4287	17.8722	20.5618	14.6167	8.19335	28.1991	0.973226	0.797328		1.4725	1.04598	29.9308	27.8703	28.4209	27.608	28.9314	22.7141	30.6601	23.5516	17.6377	29.0577	1.63685	32.6052		1.4725	0.553969	35.298	31.9614	24.6202	27.9299	26.2916	28.0995	25.9548	30.6718	22.3152	15.5548	30.6879	1.35834
1.47417	21.78	19.8752	16.1358	19.5012	19.6324	21.402	14.1847	21.1232	16.0549	7.44653	25.087	0.787586	0.78558		1.47417	1.37321	32.2597	23.6442	27.9231	26.5986	27.5791	22.3319	29.1483	24.2927	18.531	31.0502	1.57488	31.5376		1.47417	1.28119	28.9163	26.8414	26.4228	30.6412	26.0272	28.2913	21.8015	29.8371	23.3163	16.662	29.8023	1.87828
1.47583	23.8484	20.1564	18.0815	21.6315	18.2984	20.71	16.0421	18.0616	16.4095	8.11415	25.0689	1.15055	1.39822		1.47583	1.03464	30.663	24.4251	28.0114	24.1733	28.2553	25.3428	28.621	23.6746	18.0399	29.9985	1.38629	32.2436		1.47583	1.00983	32.7356	33.7664	26.206	29.5708	24.712	25.9889	20.9056	29.4706	21.6734	14.9713	31.5722	1.12094
1.4775	24.4684	19.6099	17.2773	21.0601	18.9636	20.0021	13.0183	21.075	16.4291	9.08265	26.6108	0.802777	1.15843		1.4775	1.33121	28.221	26.4856	28.1586	30.2723	28.0932	24.1378	27.5049	21.3714	17.9657	32.5896	1.19534	34.1634		1.4775	1.3299	34.5989	30.8052	23.0009	30.8837	25.7804	28.0012	21.798	29.7174	25.4465	14.1162	32.3975	0.839388
1.47917	22.5733	21.7768	18.7992	23.4736	19.1681	22.3013	14.9531	20.8295	14.2942	7.80323	26.4733	0.891007	1.05763		1.47917	0.787955	33.2374	23.816	28.6771	29.5094	28.66	21.1361	27.9044	27.1933	18.7345	30.3416	0.790663	34.1767		1.47917	0.803841	33.0896	32.0399	26.5229	34.2336	25.7156	27.139	22.4874	30.5599	25.7331	17.7582	31.8909	0.768144
1.48083	24.8635	19.6004	18.1582	21.7928	17.4228	21.3625	15.7892	19.4556	14.3602	7.68802	25.8678	0.501177	1.15165		1.48083	1.15567	30.3853	27.6944	27.2076	29.3165	28.7864	21.1774	28.3755	24.999	19.2128	31.1023	2.04107	33.1488		1.48083	0.48091	34.2862	30.8193	24.1812	31.2747	28.3633	30.043	23.5629	32.636	25.7383	16.3558	32.55	0.927849
1.4825	22.3121	21.1763	15.59	22.642	19.3877	20.3634	15.5099	18.0975	15.3627	7.919	25.8532	0.763859	0.89309		1.4825	0.8978	30.5676	26.457	31.3492	26.4386	29.8788	25.8811	29.4812	27.2897	19.1869	32.54	0.905537	35.7224		1.4825	0.758725	30.6862	28.872	24.4765	32.5438	25.5199	26.2507	24.8307	29.4709	25.5539	17.1931	28.5508	0.553566
1.48417	21.764	20.3608	17.2095	20.3103	19.9167	22.6865	15.1782	17.7868	17.9148	9.38795	26.4394	0.973752	0.724177		1.48417	1.21468	31.3987	24.3682	30.3402	30.6862	30.4398	25.17	32.5979	24.6843	17.7078	33.2928	1.50412	35.3484		1.48417	0.911886	33.9134	30.2979	23.9813	34.5391	27.1674	29.0769	22.7636	30.9594	23.7897	17.2588	30.8221	0.882681
1.48583	24.471	20.3275	19.143	21.7502	18.3692	22.3563	12.5285	20.5893	17.4995	8.22174	26.3416	1.3828	0.892212		1.48583	0.833779	29.784	25.5541	30.8652	27.8857	27.4659	25.1206	27.6266	26.8493	18.9987	32.7675	1.20591	34.0419		1.48583	1.02136	29.7397	33.7551	23.5746	29.4977	26.5006	26.8132	22.6084	32.6797	24.765	17.8411	31.5006	1.30454
1.4875	22.3693	23.6339	17.8814	25.6127	19.564	22.1205	14.1827	18.5101	17.8148	8.87409	25.7586	1.51159	1.01869		1.4875	1.23098	31.9362	23.1614	28.2795	31.4529	29.5544	24.3382	29.716	25.7823	18.4894	31.165	1.3525	31.2174		1.4875	0.854409	32.2189	30.1621	25.599	33.8146	25.488	25.5148	24.5378	32.5299	24.41	17.1907	30.6714	1.16651
1.48917	21.6086	24.3104	22.5708	23.006	18.904	21.8496	15.3294	20.4039	15.1317	7.71235	28.1415	1.13973	1.16974		1.48917	1.0536	29.722	24.3965	28.5007	29.9812	30.5411	25.4301	30.214	24.8891	18.8559	32.4892	1.18148	33.0928		1.48917	1.25751	31.8212	30.1813	28.9042	33.3941	27.1103	27.3571	23.1379	28.5522	25.8455	17.3454	32.6522	0.790175
1.49083	23.124	23.7594	21.9539	22.3479	19.7362	20.3396	16.3494	20.5701	14.4341	9.75985	25.1319	1.2952	0.866476		1.49083	0.971217	30.8651	25.6237	31.1198	28.2777	26.99	26.3554	30.7454	22.8631	16.7922	33.1361	1.375	32.2481		1.49083	1.09473	34.0084	30.9085	22.9762	32.2473	28.3369	28.8819	23.5469	31.6928	24.3169	18.4313	32.9801	0.610205
1.4925	27.7182	24.0325	18.6835	20.9742	20.2989	20.5638	18.1962	19.9866	15.7925	8.33983	27.0668	0.837431	1.11852		1.4925	0.793361	33.0942	25.6718	29.4456	27.6494	27.3058	24.3501	28.4578	21.0921	18.2312	31.3761	1.85307	32.2908		1.4925	0.727642	34.4078	29.0523	25.8472	30.6419	26.2293	28.0296	21.8977	33.1218	23.6287	17.2142	31.2686	0.662698
1.49417	20.8126	23.3223	19.5547	20.0422	22.9959	21.4843	14.7732	21.9296	17.5388	8.79856	25.6832	1.34043	1.1143		1.49417	0.439734	33.5184	25.5203	30.7653	29.1968	30.8069	25.3386	28.6697	22.6674	20.8043	32.3226	0.936653	32.7647		1.49417	0.874557	33.9749	32.4201	27.3346	29.7726	28.2087	27.8857	24.4417	32.4661	26.8734	14.9646	33.3072	0.207287
1.49583	24.1008	24.5147	18.3236	21.7582	19.4026	22.0666	16.7284	19.3138	16.6528	10.363	26.5919	1.11989	1.2198		1.49583	0.575935	29.6182	27.8311	30.465	28.8274	31.5425	24.0579	29.0185	27.0058	17.2837	33.9399	1.38284	30.381		1.49583	0.240779	30.4676	32.8317	25.5677	34.4789	28.0523	27.728	24.6642	29.3618	24.0423	19.6074	31.9666	1.31105
1.4975	25.6997	22.2821	20.0084	21.7524	22.4579	21.0223	16.1823	18.1039	16.9356	9.13151	25.7546	1.30297	0.819708		1.4975	0.698248	29.5242	27.4933	31.5208	27.4944	30.2554	23.8154	29.9113	24.8205	18.9843	32.9319	2.3271	33.2245		1.4975	1.22168	30.1976	31.3736	25.4236	32.985	25.6818	30.1789	26.2892	30.8464	23.3057	16.3884	31.6971	1.29338
1.49917	27.8904	20.2818	21.3755	20.4477	22.9048	23.3758	16.1418	18.1728	15.3016	9.0171	26.7872	1.18038	0.769264		1.49917	0.471666	29.8268	26.0691	31.2214	28.8573	29.9352	24.9138	29.5834	25.9625	19.2775	33.6091	2.10395	35.0315		1.49917	0.634249	32.7081	32.929	25.132	33.8352	27.1442	28.0408	23.2288	31.2192	24.8171	15.8876	31.2943	1.17729
1.50083	26.7198	21.8004	20.1595	23.9704	22.0125	21.4771	16.6626	17.7493	13.9448	9.28875	27.8013	1.01698	0.628972		1.50083	1.17599	30.1251	25.0146	29.7808	30.4408	27.2913	25.3734	28.3446	26.0123	18.8445	34.8731	1.69075	33.5295		1.50083	1.07487	31.7054	34.3208	27.489	35.433	27.5633	28.8644	25.0042	32.7204	25.8675	15.4642	30.0545	0.406624
1.5025	21.577	20.7808	20.6392	24.6561	18.0828	23.4947	16.7635	21.7667	15.5673	9.97943	26.672	0.720034	1.45492		1.5025	0.454201	28.0436	26.0696	28.8052	28.517	28.9289	23.683	29.1528	25.6716	20.4575	33.7455	0.972184	32.4954		1.5025	0.510465	33.2546	32.7011	25.8519	30.4251	26.2627	30.1574	25.451	33.2294	25.2702	18.7904	30.343	0.673588
1.50417	23.9635	21.0986	19.7552	21.9204	19.4961	22.7692	16.469	21.4193	17.1155	9.70576	25.465	0.929879	0.973478		1.50417	1.25148	33.2005	26.6183	29.084	28.8901	29.2046	25.8006	32.4608	26.6195	20.673	30.8892	1.09235	29.0797		1.50417	1.31085	31.378	34.204	24.2039	33.0686	26.8518	30.4637	22.4308	31.3531	23.4797	17.9101	31.6164	1.25719
1.50583	23.7835	23.8409	18.3288	23.1283	19.5777	22.3172	17.3953	20.6091	14.1139	9.4287	27.8455	0.738849	1.1659		1.50583	0.699515	29.1396	27.4521	26.2773	32.7789	28.3082	25.1536	31.9243	25.5691	17.957	31.9886	0.799604	35.3136		1.50583	0.681948	33.9816	29.8168	26.5862	31.6393	25.9422	29.7097	22.8987	30.5909	24.9574	16.1	28.9547	1.47546
1.5075	25.2457	25.5233	19.3274	22.8778	21.8038	22.8952	14.5575	18.4458	16.0133	10.0603	28.365	1.30884	0.884508		1.5075	0.468733	30.4656	28.4883	31.2376	26.8935	28.6808	25.5558	30.4694	27.0118	18.5405	31.8008	1.15169	32.5362		1.5075	1.39958	30.9146	34.3651	26.3059	32.2373	27.4821	27.3606	25.8772	31.0747	23.9758	19.7216	33.0274	0.642071
1.50917	25.1947	21.0262	17.7009	24.7381	22.3631	22.12	17.3509	17.5115	16.4739	10.101	28.6632	1.0768	0.819054		1.50917	1.07141	30.1719	24.6051	30.554	28.8019	31.601	25.9662	29.949	25.4129	18.6128	30.6789	1.88977	32.0066		1.50917	1.08784	31.3798	30.4337	23.4593	33.0864	27.0407	29.5734	22.9437	32.9814	27.0128	17.7142	31.0731	1.39456
1.51083	20.6903	23.194	20.1931	21.5965	21.7278	22.9058	16.2371	21.3584	15.9957	9.33001	27.8259	0.808779	1.46098		1.51083	0.881891	29.7673	25.6945	31.417	29.2483	30.218	24.9353	28.9231	23.9073	19.5485	35.2293	1.78687	32.5156		1.51083	1.29618	32.2685	25.9617	24.4038	31.1766	28.3803	27.6264	24.5505	32.4768	26.4929	17.2023	31.8231	1.33273
1.5125	24.1675	22.5479	17.8813	23.0055	21.1089	23.7185	19.1676	20.2014	15.7314	9.70256	26.9108	1.31981	1.16764		1.5125	1.03955	32.2925	27.1314	29.8153	28.2405	30.7209	22.8378	27.1173	26.2113	19.1266	31.0959	0.475863	33.136		1.5125	0.787234	33.7728	28.8361	27.4542	31.8276	27.2809	28.6083	24.0923	32.6622	22.825	19.5726	29.4229	1.1173
1.51417	24.7802	24.4569	17.8475	21.5371	22.0709	21.606	17.2816	19.2461	18.5452	10.3491	29.1978	0.633098	1.11006		1.51417	0.788005	33.3833	25.9884	31.527	26.3265	27.9322	23.766	31.0189	25.3957	18.6872	30.3444	1.97441	32.95		1.51417	0.774353	30.9602	31.0632	23.9388	32.5697	28.1672	28.4056	24.291	31.8145	24.282	19.4881	33.1721	1.35492
1.51583	23.4513	21.2861	18.9032	22.873	19.4691	24.5037	15.6449	18.7012	16.1458	10.7155	28.0097	1.55076	1.31398		1.51583	0.51293	31.2471	27.296	30.2634	27.2962	30.5619	24.2272	27.7798	24.9132	18.6395	29.8137	1.65881	33.6388		1.51583	0.849118	35.5272	34.4191	24.1837	30.2913	26.2701	29.5294	24.4672	33.9441	23.975	19.6792	31.494	1.72658
1.5175	23.9403	22.4418	20.8171	22.9213	21.895	24.7388	17.959	18.0023	18.0668	8.55227	28.4258	0.49254	1.41455		1.5175	0.790818	35.4384	28.6874	29.8392	29.6876	28.3768	28.1816	30.2612	28.3188	20.0749	33.6705	2.35494	37.8297		1.5175	1.061	31.7657	30.5432	26.0453	31.7747	26.4018	27.9254	23.3835	33.0516	26.5019	17.9471	34.7429	1.48714
1.51917	24.1519	22.1085	21.9243	22.9135	20.725	24.2841	17.4127	19.8388	16.5053	10.2477	29.2105	1.51359	1.06016		1.51917	0.925089	29.8596	27.1797	29.6377	26.7283	31.7527	26.0185	31.2747	26.759	21.189	33.448	1.50443	30.1931		1.51917	1.15736	32.0759	33.2169	23.2199	32.8947	27.4648	26.5393	23.8277	34.2871	25.9392	18.4822	32.1377	1.19044
1.52083	23.9059	24.0241	18.1919	24.8596	21.7928	21.3937	17.8801	21.0851	16.8482	10.7093	26.0256	0.977368	1.13656		1.52083	0.481801	33.6476	28.1726	30.4233	27.4918	32.1188	25.3513	31.8918	25.8318	20.1886	34.5796	1.3992	34.7796		1.52083	0.978623	31.1745	30.541	28.6701	32.9865	24.7885	26.6167	24.7828	31.5658	26.0596	18.8025	31.2755	0.793722
1.5225	23.9262	22.8745	19.0364	22.873	22.2285	22.3271	17.5847	20.9226	16.8732	11.3298	29.477	0.482383	1.29929		1.5225	0.908366	34.2291	25.9885	31.5321	31.8249	29.7256	26.7547	29.7583	24.8592	17.9586	37.6038	0.672932	32.563		1.5225	1.13639	33.5947	36.7184	26.6942	29.3173	23.6369	28.2663	23.4336	37.6515	27.7961	16.2209	31.1084	1.26589
1.52417	25.1172	23.5433	20.7452	23.7024	23.1463	21.1007	17.6335	19.8407	16.8583	10.5407	28.4154	1.16689	0.640064		1.52417	1.09557	30.7735	26.6088	30.6522	27.9992	30.3409	27.7215	32.4059	23.9322	20.0415	31.3382	1.69315	35.521		1.52417	0.681394	31.0742	32.7331	24.7877	34.0669	26.1948	26.5653	25.4905	33.0045	27.9961	16.6892	30.6131	0.72421
1.52583	26.1795	24.9638	18.8639	22.7389	20.7287	22.683	15.7509	20.5703	17.7704	11.0285	28.3388	0.542429	0.772002		1.52583	1.0591	29.786	28.1577	31.6694	29.9013	30.086	25.837	30.1144	25.162	19.6009	34.445	1.92422	36.7328		1.52583	1.03653	34.2925	30.9613	26.8047	35.1614	26.1492	29.4522	29.1082	29.8574	27.4427	14.8257	27.7435	0.650751
1.5275	25.9716	25.2484	21.0282	23.6645	20.6238	21.9138	18.1595	23.7032	18.0719	10.7807	29.6514	0.838082	0.882195		1.5275	0.677765	31.21	27.5027	33.3979	29.6837	32.7585	24.4942	35.8588	25.7218	20.0741	32.2423	1.66889	33.0133		1.5275	1.02234	31.6615	29.4	25.8062	31.6874	27.5312	29.3701	23.461	36.8465	27.3875	16.7592	31.2929	1.42196
1.52917	22.4725	22.5447	18.9526	23.7679	19.7827	21.3343	17.8679	21.9095	14.3025	11.1032	27.1995	0.313965	0.98696		1.52917	0.591628	33.2076	27.4052	30.0895	28.7624	27.7787	27.5526	31.9132	26.2999	18.615	32.27	1.17051	34.1597		1.52917	0.537514	33.9957	32.008	27.8978	35.3764	28.4041	26.5448	24.0809	31.7497	26.4776	18.0237	29.8181	0.749235
1.53083	24.4962	22.9805	19.9367	24.1599	20.628	22.5375	17.1288	20.5537	19.9773	9.24111	26.9435	1.01347	0.562301		1.53083	1.38016	34.3305	29.4183	29.3332	28.5549	30.898	25.3076	29.9204	26.1846	20.3949	33.3568	2.42994	35.5602		1.53083	0.46226	32.8625	30.6674	24.1236	32.2825	28.3282	28.8613	24.1893	34.7346	28.7872	18.6773	28.7474	0.911684
1.5325	23.1899	24.8995	21.3633	24.8975	21.2538	25.3971	17.9854	20.0884	18.4488	10.1178	29.2771	0.755557	1.097		1.5325	1.0238	33.6375	27.3555	33.4208	30.1867	31.6055	26.3652	31.0397	27.9403	17.9788	33.9717	1.40964	34.9011		1.5325	0.946344	36.6971	33.1533	28.6505	35.0682	26.7162	31.9213	23.6355	32.7998	25.8445	18.1578	31.2527	1.43403
1.53417	25.0183	24.3841	21.57	22.2075	21.574	24.0469	15.5921	22.784	17.608	9.00376	28.8126	0.896749	0.499143		1.53417	1.47916	30.6079	28.1971	33.66	28.2423	30.625	23.5509	32.619	24.5632	20.4744	33.594	1.44832	33.5983		1.53417	0.86205	34.9794	31.5684	27.3699	31.5253	25.654	30.7425	21.6074	35.21	26.497	18.9588	31.8032	1.31083
1.53583	23.2823	24.1135	19.8829	21.3138	23.3218	23.7983	16.35	20.7592	17.3747	8.2064	27.1999	1.21403	1.11926		1.53583	1.07448	29.6034	27.4916	31.8408	27.9039	30.5431	26.3826	30.5262	26.2064	19.4684	34.4633	1.13286	34.6267		1.53583	0.847937	30.5774	32.239	24.3012	32.3335	27.7934	27.6242	25.3258	34.8373	25.3696	19.5068	29.087	1.65107
1.5375	24.6914	23.6076	20.8152	24.9055	22.8205	21.1162	15.4945	21.9312	17.6526	10.6736	27.1324	1.43454	0.71234		1.5375	0.820841	31.7532	27.9163	29.7774	31.7161	31.5556	27.2858	31.8971	27.0704	18.7604	33.1858	1.38569	35.1892		1.5375	0.940569	32.7605	31.0007	26.2367	34.2626	27.4542	28.8218	22.0449	31.7847	25.6556	17.3613	31.0855	1.28948
1.53917	26.9112	23.7669	22.1874	22.7287	20.6913	22.1876	18.1931	19.8247	17.5375	11.1769	27.4386	1.30279	1.09411		1.53917	0.903096	31.3052	28.3234	31.7501	30.3535	32.5541	28.0158	35.495	26.2601	18.393	32.8738	0.7477	32.5903		1.53917	0.783477	32.3169	32.7136	27.1781	33.2966	27.9287	28.0711	25.4089	34.6221	26.8192	19.7071	31.1036	1.31281
1.54083	24.5982	21.6921	21.2697	21.5056	20.3854	24.728	20.4295	19.4797	14.4226	11.3267	26.8233	0.972927	1.11309		1.54083	1.24264	32.5171	27.7753	28.1228	30.6909	31.582	24.4294	30.0047	27.2158	18.2414	34.0166	1.73327	33.2965		1.54083	0.921335	31.4479	32.0723	24.6256	34.4148	28.5503	29.7866	23.9333	33.8627	26.2974	20.4289	31.4359	1.42794
1.5425	23.6959	22.646	22.4378	23.0629	21.0942	22.9288	18.1109	20.6549	19.7735	11.1044	29.1129	0.743795	1.63673		1.5425	1.04482	34.1984	27.1712	32.4934	30.8887	32.0694	25.8104	31.6481	25.018	20.1733	32.738	0.742053	31.7288		1.5425	0.633188	34.8869	31.5946	26.1678	32.6712	26.6382	32.0463	24.1666	35.7373	26.2364	19.1607	31.1683	0.734261
1.54417	24.9556	21.472	20.61	21.5784	22.8598	24.0438	16.648	21.9051	16.9129	10.7558	29.0335	0.805907	0.396602		1.54417	0.757205	32.9605	27.1644	29.6039	32.0978	30.1887	26.4455	33.4746	27.1542	21.6609	35.0474	1.42031	36.0428		1.54417	0.876386	32.4568	30.8293	27.2534	31.6181	28.4062	26.531	24.5092	34.2603	27.6948	18.3037	30.9829	1.4694
1.54583	24.3159	23.385	22.8157	23.002	22.6663	23.6182	19.1553	21.2983	17.638	10.5141	28.3832	1.2517	1.41115		1.54583	0.843615	33.423	29.7038	31.6073	30.2918	31.2488	25.5015	29.7633	26.7961	22.0592	33.987	2.24454	35.4418		1.54583	0.654922	30.7182	32.135	26.9521	33.6342	29.4698	28.2458	26.1835	33.6011	26.3099	21.6307	31.2992	1.57797
1.5475	28.3276	23.6388	18.6844	24.5289	23.2391	25.7948	19.0905	20.9212	16.9192	9.04623	31.6979	0.874654	0.677507		1.5475	1.04264	29.92	28.0429	33.2767	30.7452	30.002	27.5375	30.8693	25.2545	22.2849	34.1631	1.24131	35.0654		1.5475	0.939829	33.4659	30.8309	26.7501	35.0228	27.5855	29.3386	26.7076	30.4362	28.1499	18.5767	30.9893	0.81653
1.54917	24.7504	22.2497	20.7205	22.5622	23.0093	24.8645	19.0349	20.7129	19.5794	9.86357	27.7668	1.37993	1.143		1.54917	1.95505	32.6545	29.019	27.7864	30.0847	31.6433	27.2708	31.5778	28.4043	23.4274	35.7228	0.80707	34.7789		1.54917	0.753459	35.3593	32.3975	27.7815	33.2943	27.1679	32.3622	25.473	33.3298	28.2733	18.5243	32.008	1.25624
1.55083	23.6717	25.181	20.8345	23.8608	21.9957	26.9268	15.2592	22.3725	19.0668	10.3881	28.0598	0.781652	0.579126		1.55083	1.4114	32.1345	25.9179	30.218	32.4688	29.7921	27.0091	32.2927	29.6719	20.4036	32.2411	1.37725	38.3532		1.55083	0.97435	36.0039	30.2444	27.0284	34.427	28.4199	30.0437	24.0714	35.2942	25.886	18.0254	32.0778	1.15141
1.5525	25.0476	25.0762	22.2831	23.6551	20.5025	25.0305	16.4659	23.2272	17.8085	10.963	27.8041	0.677196	0.932876		1.5525	1.19332	30.4852	28.2547	32.2387	29.3647	31.347	23.8581	33.7898	26.5215	23.256	34.0941	1.57662	33.2829		1.5525	0.379642	32.6661	34.3208	27.0618	33.9393	28.2387	29.2111	26.9956	34.8687	26.6679	16.3697	30.8085	1.2821
1.55417	24.5326	22.3306	22.0198	24.7492	22.1675	21.9124	19.2279	19.7456	18.802	9.79659	27.7579	1.07626	1.47372		1.55417	0.861041	33.7562	29.0114	34.194	30.5779	30.498	29.9052	33.9095	27.7263	19.2817	36.8618	1.32841	35.6115		1.55417	0.771225	35.8516	35.6476	27.1371	34.5439	26.6765	29.1816	26.3764	35.028	25.6938	19.8312	30.4425	0.620207
1.55583	26.3712	23.81	21.7839	25.8178	22.7481	23.5484	17.5768	20.0165	19.2532	10.3943	26.3681	0.666389	1.06597		1.55583	0.897896	34.9501	27.4835	31.0622	30.8977	32.8284	27.2163	32.0119	26.235	23.3	32.1807	1.02416	33.5434		1.55583	0.340433	35.9322	32.7773	25.6128	32.7618	28.9037	32.2145	26.1131	32.5587	27.9821	19.1922	33.4116	0.796984
1.5575	25.3542	23.2611	21.9492	24.198	23.0408	21.6911	18.3893	24.2082	17.8633	11.7073	28.5491	0.45315	1.27474		1.5575	1.27179	35.9618	27.307	29.7732	31.2149	33.5119	26.9328	32.1993	25.7817	20.6614	34.0262	1.96705	32.4157		1.5575	0.615228	33.7612	33.3421	24.7389	34.5549	32.5137	31.2211	26.1589	36.3474	26.2974	18.4446	33.1518	1.50321
1.55917	23.6349	25.2754	21.4129	23.5937	24.0978	23.8318	18.2998	21.6821	19.1958	10.6726	25.7172	1.35769	0.894101		1.55917	0.655779	33.3985	26.9692	30.7871	30.6963	32.9046	28.2391	29.8581	28.208	18.8877	32.605	0.964594	37.3916		1.55917	1.36618	34.6774	36.0394	26.7117	34.933	27.6857	29.5226	25.1232	33.9206	28.8358	19.8164	33.7605	1.24274
1.56083	26.2356	22.0075	20.4296	24.893	24.3887	21.4292	17.6065	23.1551	15.5546	10.2737	29.1716	0.869068	0.745255		1.56083	0.925209	32.5652	30.2856	30.9346	31.0074	31.2159	27.3142	30.7198	26.852	19.8872	32.918	1.40787	33.7113		1.56083	0.719738	33.5915	30.4911	27.8784	35.0877	28.7923	30.5112	27.7172	36.338	23.9247	18.7339	30.997	1.18107
1.5625	24.426	25.0609	21.5548	25.921	22.2552	24.118	18.5892	21.9166	16.1244	12.3771	28.559	0.767539	0.839631		1.5625	0.959406	32.261	26.5161	33.1565	31.3464	29.3286	25.363	33.9902	27.4825	21.6642	33.3517	1.39968	34.1495		1.5625	1.37878	34.436	30.0721	26.0259	31.5505	25.0875	29.2801	25.1246	33.6001	27.2498	17.5589	34.476	0.941251
1.56417	27.7845	24.2536	19.9273	27.4211	23.3282	25.8648	18.0722	20.227	18.2499	11.2406	28.4043	0.991875	1.64631		1.56417	0.834829	33.0591	31.0215	34.8006	31.71	29.5643	26.2933	28.5459	27.3518	20.1711	34.7894	2.36177	31.4391		1.56417	1.45117	31.7118	32.3362	28.2906	35.1705	29.3228	32.6516	26.223	36.7931	25.8162	20.318	30.8391	0.949652
1.56583	26.4049	23.6107	21.0678	23.777	21.6641	24.9622	16.7922	19.6664	21.762	14.3904	27.9171	1.15077	0.750156		1.56583	1.34145	32.085	28.8701	36.6003	30.6693	30.4563	26.3402	31.9111	26.404	21.6905	33.315	1.80827	34.1736		1.56583	0.412174	33.6924	31.3048	27.9045	32.82	30.0213	30.8065	24.9152	36.0911	29	18.0896	29.7125	0.504301
1.5675	28.4447	21.9817	21.2812	22.624	21.6935	21.9923	16.9313	21.4086	17.9726	10.7346	27.8163	1.08278	1.22333		1.5675	1.02526	32.851	27.6617	41.9883	29.3957	30.7563	27.3772	33.6009	29.6345	22.2608	33.4437	1.0659	35.313		1.5675	0.846758	31.9507	33.9217	27.6438	34.6258	28.4732	28.0248	25.9347	31.9695	28.5682	17.7652	33.6806	2.58079
1.56917	27.1141	24.6236	19.7154	24.6139	21.4362	25.6577	18.8309	23.3874	18.1366	10.287	28.3506	0.78994	1.03571		1.56917	1.14027	29.8353	28.1706	32.3202	31.5019	29.0943	27.7603	32.1677	28.406	21.269	36.6918	1.07333	34.6276		1.56917	1.53313	36.7534	34.7401	27.4391	36.8507	28.2405	30.707	27.2048	34.7767	29.5909	20.7253	31.0848	1.16436
1.57083	26.7695	24.5921	20.5453	25.1423	23.0563	26.8055	18.9214	21.1088	19.0891	11.5904	25.2115	0.525928	0.86451		1.57083	0.434235	31.9037	32.23	32.3993	29.3785	33.3156	26.4514	33.2427	28.3289	22.5954	31.1931	1.06987	36.5306		1.57083	0.792054	33.1798	32.216	28.6078	33.6523	28.5061	29.1469	25.93	32.1358	24.9858	20.0626	30.9237	1.64391
1.5725	27.5269	23.8165	23.3843	24.2212	22.3245	24.5382	18.2975	21.9086	19.229	10.7809	29.0247	0.810426	1.09715		1.5725	1.04404	32.3042	25.4727	33.0893	31.7916	32.5709	28.3021	33.1134	28.8675	23.6432	35.75	1.59958	32.974		1.5725	0.497839	35.4111	32.573	26.9069	34.0979	31.9631	27.5183	26.0678	34.5961	25.1066	20.8641	34.5333	1.23914
1.57417	25.7455	22.6246	20.3819	22.1836	21.9772	23.8616	19.4006	22.5727	18.6407	11.9919	27.0834	1.02633	0.836663		1.57417	1.48683	35.7249	27.3126	31.7943	32.9617	29.6239	27.6411	32.3595	26.546	21.5023	36.6148	1.11222	32.9733		1.57417	1.07884	33.2363	30.2029	29.7075	34.5089	26.6114	29.8556	27.1604	30.9662	27.4176	19.7129	33.0018	-0.0464938
1.57583	25.5557	24.3897	23.1722	25.4495	22.9508	23.4345	18.0258	23.068	19.701	12.2461	25.0121	0.885721	0.683294		1.57583	1.46884	35.3861	29.5814	34.7055	31.1577	31.7876	28.9785	31.9628	29.0306	23.6868	32.6447	1.331	35.7143		1.57583	0.874053	32.7565	34.1026	27.5583	33.9019	28.9997	30.9701	24.3621	32.8359	27.8494	19.7628	32.3429	1.07623
1.5775	24.5965	24.0328	19.9922	24.3096	21.8983	25.2704	17.9208	19.7497	18.0151	11.0664	28.1796	0.616536	1.45507		1.5775	1.18529	32.4598	30.3304	31.2861	29.1884	31.8126	27.3005	31.095	27.8301	25.0594	35.5683	1.15121	37.929		1.5775	1.96945	36.7047	34.4888	28.7028	33.8549	27.7614	34.3009	24.8842	35.17	28.2248	21.4715	32.1573	1.91601
1.57917	24.6615	24.5755	20.1761	25.4485	21.4443	23.9183	17.7631	23.054	18.471	12.2302	30.5746	1.03869	1.25573		1.57917	0.577429	37.2087	27.6384	35.9392	29.4169	33.2762	28.7174	27.8787	25.4009	19.2216	35.6362	1.31564	37.3938		1.57917	0.951153	32.2978	35.6221	24.5693	34.0997	29.4914	30.4386	25.8287	34.6696	29.1434	19.2687	34.5026	0.54236
1.58083	25.8287	24.8117	23.67	25.9341	23.566	24.9453	20.1861	19.0202	18.743	10.8685	27.0693	1.17091	0.723004		1.58083	0.599251	31.7402	29.7374	32.5961	30.2179	33.0561	29.0912	31.1481	29.1761	22.2015	33.7802	1.39156	35.4918		1.58083	0.487991	33.7813	36.1209	24.1318	32.7892	31.1515	29.7189	25.5763	34.9263	30.5672	19.2653	33.5112	1.65195
1.5825	27.0976	24.1609	21.6355	26.4654	23.4749	24.8704	20.0069	21.2991	17.8401	12.3566	28.3528	0.870412	0.718078		1.5825	0.741573	31.5067	28.8351	33.1563	29.3556	30.4261	30.7053	31.0855	27.2541	19.9145	36.2836	1.06276	34.6358		1.5825	0.946761	33.9599	33.7323	30.2242	35.5242	27.557	28.8558	25.5152	37.8674	28.6027	18.7236	30.7186	1.23989
1.58417	24.3534	23.0668	19.9354	23.0334	21.2046	27.9999	20.8243	23.1232	19.2664	11.6313	29.4706	0.799862	0.749391		1.58417	0.444849	34.7135	29.7409	35.0563	30.0036	32.7288	27.8117	32.8705	26.9301	22.719	35.063	1.24724	35.3848		1.58417	0.975113	34.6116	32.4071	29.28	34.9207	27.7052	30.9258	27.7839	36.4942	27.766	19.9653	30.6748	1.23015
1.58583	27.3795	26.4221	20.7669	23.4183	24.8174	23.5534	18.6235	22.9611	18.4781	11.6159	29.1779	0.839884	0.890566		1.58583	0.844943	34.2095	27.2011	33.2247	29.8276	33.6342	26.5449	31.7904	30.2053	21.3331	34.4061	1.46043	38.6359		1.58583	1.24596	35.613	34.8114	28.2493	34.4299	30.5045	31.1234	27.0752	37.4246	28.0699	19.6441	29.9723	0.829322
1.5875	23.802	23.981	21.3171	23.723	24.0823	23.5989	18.6674	22.5737	19.0089	13.491	30.5731	1.1215	1.49726		1.5875	0.699617	34.4056	27.1505	35.2256	28.6757	28.8832	27.8966	29.681	28.1256	22.293	32.9866	2.52046	32.794		1.5875	1.30395	33.5526	33.7753	28.2061	33.246	31.0767	29.2319	27.782	33.7407	28.6793	19.3557	33.2507	1.16094
1.58917	25.6202	24.4243	24.4095	26.4083	22.9621	23.3516	19.2931	22.2273	19.5092	11.4685	25.7709	1.14916	1.07303		1.58917	0.79703	33.5217	29.8041	31.8085	30.9536	33.501	28.4093	34.0779	31.9048	23.0842	35.4981	0.910179	36.4006		1.58917	0.995412	37.0332	34.8389	31.0856	33.4103	29.5705	29.0051	26.1667	33.4736	31.0223	18.7315	32.3191	1.0746
1.59083	26.7566	23.5547	18.8843	26.2288	22.1656	24.9335	18.5909	19.9878	19.5859	11.4912	30.1459	1.10422	1.2562		1.59083	1.2168	32.2856	32.7105	27.7993	27.6716	32.185	27.827	31.9137	26.7181	21.6189	32.3374	1.86622	33.2521		1.59083	1.25044	35.1557	34.9396	26.4368	33.1793	27.0593	32.0671	29.1056	33.2998	32.3964	19.5281	36.7945	0.562566
1.5925	29.4346	23.7569	22.932	24.1966	23.7471	27.3387	19.2743	21.0645	18.0141	13.4265	27.2091	0.515818	0.842566		1.5925	0.976605	34.3092	29.8048	31.2855	30.9685	32.555	28.6235	34.2414	26.5464	22.7477	33.8741	1.18223	36.2647		1.5925	0.934247	33.5366	31.2312	28.0575	31.5426	29.9841	31.6513	27.6556	35.493	27.7673	19.737	31.9264	1.782
1.59417	27.2997	23.2069	21.3161	24.3229	23.6899	26.0322	20.8792	22.137	19.1357	11.7596	29.6229	1.10413	1.17366		1.59417	1.07599	32.1811	30.2536	31.0554	29.7721	36.6247	28.8298	35.6659	28.1857	20.7683	36.061	1.5371	38.8937		1.59417	0.978495	34.762	34.1822	28.6167	36.0399	29.512	31.7708	25.9367	36.8472	27.3138	19.9665	36.1306	0.00245285
1.59583	25.2933	24.1755	23.1651	24.4837	22.8214	24.8258	19.0656	18.7631	17.7118	12.7494	28.1082	1.1251	0.813296		1.59583	0.849527	37.1571	30.1163	30.6082	28.6576	31.4021	24.7094	33.9965	27.954	22.0638	33.4068	1.7353	36.6415		1.59583	1.26537	33.5021	37.0229	30.1509	35.8724	29.2501	31.272	29.4143	35.246	28.8459	24.2243	35.0699	1.54385
1.5975	27.8629	23.1176	20.8935	26.055	23.6237	24.4585	19.7538	20.7754	23.44	12.0631	30.1908	1.28855	1.22679		1.5975	0.780268	33.4027	30.6681	33.0239	32.796	31.6285	26.8526	32.8281	28.8676	21.7496	35.4931	1.52572	36.4847		1.5975	0.685855	33.7127	32.375	29.1314	33.4225	27.0692	31.835	28.6198	36.7203	29.112	21.4044	32.8002	1.241
1.59917	24.1966	24.0481	23.2653	23.806	24.1219	27.5401	18.8406	21.2376	17.199	13.313	30.2155	0.889197	1.35341		1.59917	0.795545	34.4406	32.9062	34.396	32.0563	32.6478	28.7831	32.9324	28.944	23.8914	37.061	1.67431	39.5787		1.59917	1.61929	34.2662	30.9597	26.3026	32.5882	29.5736	31.0433	26.2367	32.8226	26.0606	20.6804	30.56	1.35529
1.60083	27.159	26.4743	20.8568	26.2812	23.0936	26.1465	19.0947	21.5878	20.4907	10.4334	32.1847	0.801586	0.701277		1.60083	1.00145	36.7167	28.6829	32.0584	31.2984	30.0879	27.623	34.3127	26.8861	23.1434	36.3108	1.37975	35.195		1.60083	1.31114	32.6129	35.2244	26.5363	34.5544	27.9512	31.7499	26.6286	36.9678	26.9762	20.5188	32.4509	0.701838
1.6025	24.4548	26.4683	22.4702	25.2081	20.8542	24.6522	19.1838	23.9698	19.391	11.1508	28.4901	1.08073	1.01084		1.6025	1.68071	33.1576	27.3869	35.0813	32.0664	32.684	26.4527	34.8878	29.8733	22.2054	34.5643	2.49892	37.1253		1.6025	1.30851	35.6814	32.3889	27.5915	33.7795	29.2191	30.0195	24.4644	37.9518	28.6074	18.2007	31.8249	1.27234
1.60417	26.582	25.1439	22.2992	22.8666	24.8728	25.4792	20.8046	21.7932	19.6446	11.8481	29.3565	1.27027	1.2124		1.60417	1.58039	29.6048	30.5287	33.6213	30.0383	31.3012	23.7661	30.2999	29.7683	24.0691	33.5354	0.983799	36.3883		1.60417	0.541016	32.0951	33.0052	31.1312	34.8511	30.8212	33.8448	28.1376	37.2772	30.653	20.4246	30.8338	1.07285
1.60583	26.2952	23.8808	23.8102	25.919	24.2802	25.6859	19.7542	21.2958	19.9912	12.6634	29.4525	1.02047	1.16328		1.60583	0.8434	33.8048	29.3531	33.2892	29.6012	31.8328	28.5857	34.6708	26.8855	19.5316	36.6728	2.02767	38.4225		1.60583	1.32996	34.6837	34.2178	26.0321	34.1703	28.7706	29.5592	26.7889	32.939	28.1623	23.0917	32.0956	1.23999
1.6075	26.9037	23.4675	23.545	23.3138	20.6897	25.8464	21.1337	23.8453	19.8773	13.2926	26.6336	1.11717	1.38337		1.6075	1.04969	32.2903	28.8662	36.0779	32.7783	34.8672	31.5931	33.2454	28.9424	21.9577	33.5015	1.03377	34.4634		1.6075	0.990144	37.0938	34.8366	30.111	34.5835	28.0502	33.2401	25.7764	35.7216	30.598	21.9382	32.4031	1.35052
1.60917	26.6369	22.9742	22.791	25.5165	22.0056	23.5373	21.5512	21.0043	18.1931	12.4231	29.3656	1.54713	0.944226		1.60917	0.904239	35.7166	30.9458	34.8421	29.8288	33.0949	27.1765	34.6704	28.6554	21.5163	32.494	1.27173	35.729		1.60917	1.36641	36.4087	30.4614	29.9934	33.0765	30.2845	30.5158	29.7125	38.2208	29.1203	20.5111	29.8687	1.19149
1.61083	26.7591	23.0097	23.1418	23.0984	22.8197	24.3543	21.1216	23.5694	20.603	12.0509	29.2812	0.868395	0.903926		1.61083	1.03232	36.0246	31.9628	34.2661	31.6013	33.5021	31.0353	33.9795	30.2886	23.6397	38.4262	1.17219	36.7292		1.61083	1.23299	31.0383	32.7249	28.2799	31.9293	27.0641	30.7589	27.2829	36.0675	29.0003	21.1444	31.2493	0.624115
1.6125	26.439	26.0632	22.1967	24.3887	23.5272	24.9327	20.7275	22.6254	21.8713	12.5567	31.0201	1.43762	1.50395		1.6125	0.716037	36.5341	29.439	33.5517	31.0035	33.4434	28.7853	33.6893	27.4014	23.1798	38.1735	1.74607	35.4516		1.6125	0.895705	36.698	31.2574	27.6201	33.726	30.2526	32.621	25.4247	33.0648	28.1997	19.7365	33.2251	0.775468
1.61417	26.7849	26.1164	24.2718	24.1861	23.8385	24.8785	19.2635	25.1623	18.8206	13.3853	31.5308	1.05203	1.28626		1.61417	0.949756	36.3944	28.5854	33.0974	29.7954	32.8148	26.9254	36.6697	27.3615	21.8345	34.8601	0.497504	34.3546		1.61417	0.552059	34.4806	35.9014	28.8555	34.4259	30.8319	29.8746	29.7632	36.6696	29.0965	22.1791	32.3436	0.964595
1.61583	26.1342	25.1938	23.345	26.3725	25.2358	26.7221	18.2624	22.8471	19.855	13.2407	28.8068	0.624987	1.52714		1.61583	0.583496	36.9044	29.6163	35.9614	31.2235	29.7639	28.0101	32.7265	30.268	24.6892	34.8103	1.31327	36.3651		1.61583	0.948439	33.7823	31.9932	25.4067	33.3524	28.0302	30.792	29.8958	34.7322	26.8217	20.9394	32.3353	1.32401
1.6175	26.8007	25.0074	24.5987	26.6428	23.7357	26.1299	18.7133	21.4074	18.0617	13.4929	26.9535	1.31497	0.661065		1.6175	0.985486	35.4315	30.9666	31.8609	31.0968	34.1162	28.1243	32.9435	28.4075	24.4509	35.4422	1.1297	38.0161		1.6175	1.41765	33.2137	33.6867	26.4999	35.101	31.9167	30.5754	26.4565	32.8396	31.073	22.5877	31.961	1.30827
1.61917	26.1869	26.6344	23.2777	26.4649	21.3651	23.9518	18.9943	21.191	20.6142	12.9018	28.2108	0.410562	0.97756		1.61917	1.05303	34.3698	28.8647	33.7514	32.1198	33.8244	31.3102	33.2853	28.2677	23.4544	34.8241	0.718393	35.6317		1.61917	0.772542	31.2075	33.503	28.4742	35.8911	29.6669	33.4316	29.3183	36.9823	28.9003	22.9526	32.9963	1.2313
1.62083	23.5283	24.5788	20.5644	25.5667	23.9288	25.5889	19.4082	22.4657	18.1964	12.5873	27.7515	0.482689	1.27104		1.62083	0.948133	36.6221	29.8547	35.9082	35.1504	31.1778	30.0712	31.8318	31.0886	23.1544	37.298	2.47917	38.8789		1.62083	1.49224	33.437	35.245	27.5763	33.9568	27.6772	31.7743	26.9311	33.744	29.3264	22.9092	35.3691	1.23539
1.6225	26.0729	23.0668	22.1533	24.1918	23.6958	23.7172	20.0302	21.8511	21.0083	11.9415	28.5076	1.341	1.0082		1.6225	1.40004	32.8264	30.4659	32.628	31.1216	31.6605	29.4211	31.1411	28.4408	21.4316	32.4863	0.964388	36.1325		1.6225	1.02782	33.7684	33.3809	29.7544	34.7211	32.3848	34.1246	28.4057	38.9262	29.3876	21.5162	32.9313	1.40979
1.62417	28.2699	26.7656	22.3729	26.7229	22.5114	22.3233	19.3789	22.5644	23.7086	12.1181	29.9442	1.19854	0.741257		1.62417	0.619236	33.0612	31.5731	32.6913	32.8975	30.8949	25.6983	33.8568	29.8561	22.6387	36.7335	1.71586	36.7502		1.62417	1.00169	36.5638	31.2546	29.6479	34.4058	29.2873	30.731	26.9767	37.5479	30.3044	21.4642	33.7174	1.24262
1.62583	29.0176	24.1879	22.8496	25.0111	25.3011	27.0905	20.563	21.9687	22.3216	12.2936	29.6873	0.972849	1.07036		1.62583	0.989576	34.2455	27.6563	32.9907	30.9585	33.4557	31.2902	34.6682	28.3956	21.2031	36.946	1.17705	37.0103		1.62583	1.09692	34.5643	33.3236	28.9643	34.0498	31.2554	32.3597	26.5653	35.3148	30.6742	22.909	33.9311	1.21944
1.6275	25.7583	26.9435	22.8387	25.7801	22.4002	25.1055	20.1346	23.5186	19.052	10.5715	29.534	1.19551	0.950992		1.6275	0.927767	33.9347	28.9388	32.5857	31.6383	32.9871	30.6614	34.4278	29.2691	21.3997	35.0486	1.38678	38.7936		1.6275	0.672827	35.1212	33.9739	28.5822	34.8826	30.9649	34.3853	27.7204	35.7235	31.8818	19.8701	31.8813	0.944251
1.62917	26.0025	26.5898	22.0637	28.0494	24.6996	25.6272	19.2051	23.9155	18.3265	14.9192	29.4944	0.91356	0.990797		1.62917	0.942338	34.5172	29.4615	33.5296	33.4146	32.2188	29.2671	35.3082	27.7154	24.3035	38.6244	1.52836	35.6783		1.62917	1.06707	35.4652	36.8038	29.4675	35.0911	30.5978	30.1494	26.0935	33.9113	28.5015	22.4581	33.8933	1.82528
1.63083	28.6273	26.2755	20.5141	24.2689	22.8229	28.6177	18.6054	23.6912	19.3855	13.1101	28.635	1.50304	0.976832		1.63083	1.13273	35.5549	30.9673	34.5107	29.7882	33.508	29.3304	33.1198	29.4593	25.2694	31.9608	1.68872	36.1639		1.63083	1.13921	34.3751	32.5359	28.0635	34.9824	27.6799	32.186	27.0685	34.5429	28.197	21.512	33.572	1.53928
1.6325	27.6817	25.216	24.5899	23.7932	25.34	24.7478	20.5441	23.8813	20.8914	11.9193	30.0935	0.830582	0.778868		1.6325	0.886717	39.2609	30.0351	28.389	28.4541	31.1945	26.5541	34.5981	29.733	22.2963	35.1158	1.19571	35.599		1.6325	0.92943	35.4272	38.4205	25.9497	35.0984	30.0272	27.048	28.5366	35.5407	29.6359	22.1914	36.2326	1.45706
1.63417	31.9114	23.8631	18.5083	22.8841	23.0383	27.1538	20.3022	21.0634	19.8338	13.9864	30.3666	0.561419	1.30067		1.63417	0.287014	35.0105	31.8074	35.6118	29.6391	32.3129	27.9411	35.2565	30.3697	24.4011	38.3584	2.01549	36.5556		1.63417	1.1981	32.6498	34.1577	30.0702	37.7372	27.4243	34.0157	29.1088	37.359	29.513	21.9583	32.5614	0.454183
1.63583	28.1993	24.5857	24.3374	25.1671	25.4418	24.9858	20.1081	24.7911	19.011	12.1669	28.9545	1.16129	0.779456		1.63583	0.808725	31.6714	30.2203	33.7497	33.8711	32.3333	29.2194	34.4015	30.4094	26.2833	37.2439	1.49087	36.3958		1.63583	0.760354	36.8141	33.6917	27.646	34.7538	33.6805	35.5738	27.4774	34.6267	26.7857	26.2503	35.4529	0.587436
1.6375	27.7773	24.7282	23.0559	26.1586	24.089	26.7387	20.5399	23.5596	21.1174	12.8588	31.2448	0.710319	0.975525		1.6375	0.563222	33.5935	28.1764	34.721	29.8094	31.9169	27.6854	31.6166	31.523	23.8295	32.2	1.16703	35.9121		1.6375	0.822801	36.6194	33.3614	27.8172	38.1835	27.9131	30.9829	30.5289	36.4245	29.9494	20.2226	32.9398	1.285
1.63917	25.3802	26.9146	20.8867	24.6542	21.4063	26.7041	22.0915	24.4689	18.6509	13.1752	28.5373	0.676162	0.841152		1.63917	0.645204	38.3133	32.0175	35.1086	33.6047	34.2171	30.2274	34.8651	27.2735	25.5131	34.7209	0.789387	35.0213		1.63917	1.09784	34.9821	37.115	28.7105	35.8251	32.9523	29.7137	27.3422	37.4718	27.5494	20.9453	34.9181	1.54308
1.64083	27.965	25.5578	24.0305	27.7339	24.6466	26.1626	21.3494	23.115	19.1767	12.9258	31.3518	0.50145	1.10414		1.64083	1.09259	36.5038	31.2309	30.7264	35.4687	35.5321	28.1762	35.442	28.3339	26.7375	36.7785	0.867969	33.6097		1.64083	0.838112	36.8334	32.8414	27.4924	35.595	27.5768	30.6632	29.8735	35.9626	29.2027	22.8336	33.3524	1.31645
1.6425	29.7454	22.7011	22.6219	27.8387	24.6895	24.3929	19.0804	23.3509	20.3331	12.4126	27.4551	1.32086	0.849005		1.6425	0.861897	36.1628	32.4319	35.1761	34.5048	33.3503	31.1547	34.0139	28.7906	25.6202	34.2448	1.72388	36.5517		1.6425	0.800747	34.2808	36.6206	30.7221	34.6396	28.1736	30.1756	25.1741	33.579	28.5657	21.0709	34.8921	1.64728
1.64417	28.3557	26.1625	22.1036	25.4616	22.1358	26.8281	19.5471	27.8157	20.7914	13.85	30.0287	1.6535	0.948829		1.64417	1.03674	34.5345	31.6206	34.899	33.3831	33.9805	31.5717	30.982	29.6641	23.1113	36.6424	1.94316	34.2269		1.64417	0.890858	30.7884	37.0574	27.5284	36.0887	29.8953	32.6726	30.3175	35.7699	27.0866	24.2723	35.6667	2.0303
1.64583	28.2829	25.6958	24.41	28.3567	25.0918	26.0935	18.996	24.14	20.9865	14.392	29.1812	0.649646	0.847288		1.64583	0.574505	32.8166	32.0793	34.2291	35.5017	31.6034	30.9255	35.3388	28.4156	25.4285	36.1471	1.80917	38.8201		1.64583	0.624442	35.6618	35.2426	28.4693	34.8897	27.7935	30.3643	27.7603	37.8651	31.1115	21.2288	33.4075	1.02832
1.6475	27.471	25.9824	22.1885	25.659	20.047	24.0472	21.169	22.7102	22.1781	13.2456	27.0902	1.05882	0.857746		1.6475	1.05358	38.1813	30.1237	32.6258	30.9027	32.6249	29.694	34.0302	32.9336	24.3623	32.6999	1.23291	35.7241		1.6475	0.370726	35.0574	32.1032	29.0961	34.7631	30.4324	32.4629	29.4609	37.2299	31.5322	20.2376	34.3883	1.61297
1.64917	27.4054	25.9083	25.0463	28.4999	24.8016	26.3628	20.2967	21.4063	21.1441	13.1582	27.8118	0.623817	1.12703		1.64917	0.694414	37.314	29.8786	33.7449	30.9318	33.1459	29.9607	33.3659	32.7088	24.7365	35.9341	1.20274	36.4063		1.64917	1.55954	36.5483	34.3439	31.7646	35.9322	30.2509	32.1481	29.7573	36.9984	31.1281	23.0608	33.855	2.20678
1.65083	27.3228	25.8671	24.1931	26.6285	25.2028	28.1423	20.8137	22.6496	20.0697	15.7059	29.8614	0.90344	0.757723		1.65083	0.629383	36.3401	28.166	34.0512	31.9573	31.1341	28.6818	34.363	27.7708	23.9004	36.818	1.51481	37.5572		1.65083	0.872391	35.3997	35.6388	26.9151	35.1389	30.0893	28.125	28.629	36.5923	30.8022	21.3414	34.0599	0.783757
1.6525	28.9154	24.1303	23.7169	24.1453	22.7619	24.4313	18.4905	21.4424	19.3956	14.1122	29.7728	0.610022	0.278826		1.6525	0.988875	33.4077	33.0055	33.7617	32.6539	35.6902	30.2354	36.3782	29.612	23.7094	35.1331	0.83425	37.1854		1.6525	0.899038	33.1187	33.0076	30.2764	36.0572	30.3328	34.1126	27.0505	38.2114	31.0925	21.9499	33.4037	0.63412
1.65417	26.3464	24.7371	24.1405	30.8315	23.8663	24.1886	21.7818	22.3804	20.7568	11.5464	28.1934	1.03764	1.33275		1.65417	1.02704	38.5244	28.6999	33.8451	31.3218	32.4486	32.5446	35.1258	29.6575	24.8801	33.4896	1.55061	34.4614		1.65417	1.10194	34.0701	34.414	30.9172	36.0851	31.224	31.4649	28.1717	36.4306	29.6797	22.8137	33.1144	0.90118
1.65583	27.8224	26.1972	22.8216	24.4062	25.3629	25.256	21.5609	22.4197	20.2748	15.5815	30.9398	1.54156	1.56488		1.65583	0.284023	36.2862	30.1141	35.6383	31.5423	35.355	30.4319	35.5495	29.0753	23.2034	34.7436	2.99853	38.178		1.65583	0.931988	38.1267	34.0448	28.0965	35.2627	32.0879	32.9939	30.4832	35.6688	30.2366	22.7915	33.4393	0.594553
1.6575	28.7926	25.4204	22.5237	28.0853	23.0879	28.2058	20.7234	24.0297	22.7914	13.2263	32.0313	0.846633	0.791122		1.6575	0.995889	36.412	32.514	32.0771	32.308	35.4781	31.6181	33.8434	30.6096	24.3712	35.341	0.834115	35.956		1.6575	0.80048	37.8738	31.8896	29.1605	36.4264	32.1101	31.4765	28.5762	32.9939	28.2732	21.9116	33.3611	1.25931
1.65917	25.3846	25.7462	24.4794	23.2276	25.0739	27.1635	22.0741	24.8452	20.9639	14.6301	30.0669	1.2483	0.849365		1.65917	1.14904	33.2837	31.3238	34.6276	29.9406	34.6601	28.6861	34.9755	28.9995	24.13	36.3071	1.44818	38.2829		1.65917	1.34602	34.3488	31.5113	27.6401	37.637	28.3371	30.2191	28.7823	36.8249	30.3605	19.8185	32.4617	1.56712
1.66083	30.1317	26.1271	26.8774	28.3217	23.8328	27.0455	20.5914	21.9572	21.0728	13.4407	29.777	0.939488	0.226785		1.66083	0.778412	35.6819	33.4308	32.4579	32.1903	33.6827	30.191	37.9465	30.075	23.6127	35.7926	1.03136	37.4502		1.66083	1.1274	36.8351	35.1968	30.0938	36.4183	31.4351	32.5342	28.3824	36.2482	30.0454	21.7704	30.4273	1.12861
1.6625	27.5317	27.0006	23.0418	23.8441	22.4873	26.7752	22.1892	23.5723	19.2501	14.9732	30.9877	1.33307	0.755826		1.6625	1.23486	36.0287	31.7775	36.753	33.5816	34.008	31.8584	33.8797	28.6434	23.1377	34.4647	2.03374	33.9998		1.6625	1.08573	35.9636	34.7965	29.5814	35.3407	31.3656	31.7266	29.2207	35.6308	27.9706	24.6861	31.4954	1.00268
1.66417	26.3392	29.8282	21.4017	26.3887	22.3277	26.128	23.0472	23.4824	21.4744	12.5222	31.5884	0.907225	0.978557		1.66417	0.889254	34.2167	29.8075	33.8648	28.9675	34.7339	28.3655	33.4393	28.4995	22.4404	38.8068	1.25505	36.9544		1.66417	1.08437	39.8172	36.2529	30.6046	34.9156	29.0948	31.2516	28.8677	36.1533	31.0211	24.2162	31.7931	1.01207
1.66583	26.0541	26.1818	20.9974	25.3092	30.0601	28.8912	18.7236	23.0783	19.3842	14.7771	31.764	1.33173	0.823545		1.66583	1.02482	35.4522	30.0904	33.5161	32.352	36.0682	28.9239	34.9265	29.4258	23.4405	36.3851	1.31358	35.5501		1.66583	0.868942	35.0484	30.0448	31.6092	35.9931	29.0522	32.8132	26.3925	34.7237	30.0762	21.9831	35.021	0.0334718
1.6675	29.1689	25.8826	24.0816	25.6213	22.6137	23.2695	20.3299	24.9596	21.2659	13.4764	30.5081	0.943438	0.664686		1.6675	0.98148	35.5403	29.9	34.6075	33.4811	36.0592	28.993	35.2782	29.0571	24.9704	36.1134	1.46622	36.9656		1.6675	0.877094	37.5724	34.3201	28.7392	37.4101	29.1395	35.3057	28.7322	36.4135	30.4671	20.2919	32.7872	1.00096
1.66917	26.4012	26.3372	23.8573	26.2648	25.9158	26.263	20.9908	23.9448	21.4133	13.559	28.2199	0.859402	1.01471		1.66917	0.534859	34.7097	30.6331	33.1228	30.0258	34.3206	31.5231	31.4822	29.5058	24.3471	40.9237	1.01132	34.4778		1.66917	1.25302	37.5921	33.4956	27.1841	34.1801	29.612	32.1078	30.3743	35.9088	32.3928	24.5719	33.5747	1.97637
1.67083	29.3879	26.9178	22.3258	26.2961	23.7395	24.9099	23.8018	24.6752	18.4786	14.0045	30.0809	1.55589	1.04149		1.67083	1.07647	35.4297	31.4114	34.3952	34.1023	34.0775	30.26	33.5551	30.4816	26.9977	37.339	1.44381	35.4711		1.67083	0.568014	37.7877	36.0069	29.3725	35.8979	30.3723	30.8271	27.7028	36.1465	29.7467	19.8129	34.3501	0.643505
1.6725	24.6114	27.8063	22.4507	27.7916	24.591	26.6897	21.344	23.0397	21.6504	14.028	31.9368	0.669449	1.2681		1.6725	1.12275	34.4968	27.8176	33.938	33.1161	34.8267	30.8588	35.357	29.8375	24.0997	38.2352	1.80857	35.3003		1.6725	0.607059	35.6309	31.1475	28.4173	37.6761	31.4114	28.8273	31.4302	39.4902	32.9474	23.2619	35.167	0.774981
1.67417	29.1289	23.3743	22.2826	27.417	22.8208	27.3696	19.6867	25.6153	22.0868	16.0847	28.9235	0.586599	0.620586		1.67417	1.01639	33.2919	28.7105	36.388	34.0185	33.0569	27.9588	33.5161	29.2941	23.7084	37.1992	1.32763	40.4677		1.67417	0.885599	34.2033	36.6266	31.1285	35.0854	32.5025	33.2817	30.0159	34.8231	30.3532	21.6568	34.1533	1.03823
1.67583	24.8397	25.8441	26.3049	26.4557	25.5419	26.8935	20.527	23.4153	20.7648	13.8877	28.6411	1.54833	0.65341		1.67583	1.07628	34.4046	34.443	32.5307	31.5043	35.096	32.1439	35.5854	29.6954	23.182	33.3016	0.979018	33.9543		1.67583	1.39961	36.5289	36.0624	30.5682	36.2342	29.3106	31.7371	27.0109	36.6421	33.856	23.0544	35.7333	0.861574
1.6775	26.5561	28.8342	21.749	27.0984	24.231	28.5533	20.2618	23.4783	22.221	13.7955	30.5803	0.940191	1.05417		1.6775	0.961538	33.577	29.5935	34.8826	31.1904	32.7926	29.4759	37.7983	30.1215	24.8585	35.8136	0.596806	35.8173		1.6775	1.20408	32.4977	36.6319	29.2771	38.1466	31.9231	34.576	29.6656	35.8044	29.6158	25.3482	34.5094	1.04383
1.67917	26.858	26.8813	23.2272	26.7422	26.2517	26.6731	23.2864	21.7831	20.5384	14.3363	30.9927	1.15259	0.814792		1.67917	1.2697	31.8144	32.0005	33.5287	28.2892	32.652	30.6818	39.4346	30.6972	21.492	37.7132	1.00689	35.2469		1.67917	0.868945	37.4366	31.3368	28.3549	35.3612	34.9488	34.5395	28.0226	36.6809	29.0475	23.1053	32.5838	1.29856
1.68083	27.328	24.4044	24.7036	25.7463	22.6164	28.834	19.9875	24.8064	21.5167	13.8059	29.1907	1.01992	1.78341		1.68083	0.659312	32.1643	31.0643	36.8497	32.8215	36.2283	32.5564	34.4779	27.3874	23.3502	33.8983	1.13224	36.1616		1.68083	1.20079	37.2012	34.3604	30.2152	35.5529	32.0009	32.5475	29.4176	38.784	33.1261	20.1145	33.3198	1.36007
1.6825	26.8476	24.4366	25.207	28.3522	27.4843	24.5394	20.6529	24.808	21.1994	14.4493	31.7745	1.19801	1.08807		1.6825	0.969547	34.889	31.3878	36.2383	33.2703	33.6466	34.5712	35.7846	31.0829	23.7967	38.9922	1.45093	37.7584		1.6825	0.875342	38.1814	35.0624	30.4885	34.494	31.2937	32.9937	27.9966	36.003	33.3569	21.5642	33.4397	1.6755
1.68417	30.5158	26.7828	24.4834	23.352	25.287	26.0425	24.0248	22.3934	19.2611	15.3154	28.5672	0.696712	0.788324		1.68417	0.543975	42.1668	34.1344	34.9609	34.1409	34.6321	29.5852	33.7398	31.2269	23.1831	32.2745	1.48828	37.9475		1.68417	0.751127	36.5174	36.7581	30.3684	34.8024	28.7434	32.8887	29.4028	36.8883	31.5521	23.763	35.8461	0.876093
1.68583	26.307	27.5982	25.744	26.7305	22.7852	27.296	20.8608	24.4299	21.0106	14.3053	27.5906	0.979349	0.889944		1.68583	0.840634	38.922	31.6325	32.0921	32.398	36.3074	32.2951	35.7579	33.3305	25.5069	36.9855	2.29866	34.9028		1.68583	0.978133	37.1104	36.0917	28.1656	34.1236	30.3503	33.4171	29.6379	37.6667	29.1182	21.2278	33.9019	0.898414
1.6875	26.238	26.0355	21.4743	26.8448	24.72	27.4176	20.6786	22.209	22.4998	14.7375	32.733	1.48468	1.08874		1.6875	0.893455	36.7578	29.9658	35.2734	34.6099	37.0019	31.095	37.5743	29.3745	27.3128	36.0538	1.47156	36.85		1.6875	0.969654	34.5806	31.7572	32.5622	40.1096	33.2907	31.2381	29.9946	39.1808	32.7908	23.717	32.779	2.29009
1.68917	26.2134	26.5442	26.7375	28.683	24.7111	26.5377	20.7681	20.5384	21.4209	13.2933	31.4281	0.616916	1.40503		1.68917	0.769477	34.1189	30.9068	35.7547	32.5747	33.7585	32.6898	36.0839	29.4949	26.0119	38.0199	0.567624	38.5985		1.68917	1.1274	34.8806	36.7392	30.2817	37.5477	30.6847	32.5162	29.2429	38.1417	27.922	20.9658	36.5817	1.11487
1.69083	29.6027	27.289	22.0195	29.3015	25.137	26.7474	22.4425	22.8648	20.5281	13.375	30.7626	1.01391	0.94524		1.69083	0.970189	37.6866	31.2065	34.1138	30.2079	32.2775	27.4494	32.841	29.3322	25.8252	37.252	1.42579	36.4916		1.69083	1.08748	33.2494	33.1854	31.0507	35.616	30.1872	33.115	28.5836	36.6714	32.1681	20.0517	33.7171	0.562731
1.6925	31.481	26.3962	25.7059	26.9604	25.3532	26.39	23.498	22.502	22.4334	14.1976	30.8772	1.02312	0.636848		1.6925	0.946543	35.6248	32.0344	37.3731	33.5204	33.6224	30.3421	34.077	27.7715	25.8694	38.3907	1.4457	33.8867		1.6925	0.648799	37.7606	33.3156	29.9614	35.1539	29.8094	34.0616	29.8888	35.3936	30.8646	23.7959	31.1431	1.06872
1.69417	27.222	28.5443	22.7734	28.7233	26.4115	25.3898	21.1925	22.668	21.604	14.6433	27.6325	0.954786	1.08324		1.69417	0.691772	32.8083	33.4633	35.2439	30.5488	36.0238	31.5758	34.2534	28.4598	26.4925	38.0455	1.17773	38.531		1.69417	1.09539	35.334	34.2071	31.1723	36.0629	30.8634	32.7804	26.8673	36.0387	30.7369	25.3492	33.204	1.00495
1.69583	28.4985	27.5443	26.8378	26.116	25.8766	25.6617	21.3682	24.6398	20.8627	14.4931	31.276	0.709	1.24957		1.69583	0.753093	35.2467	33.6251	37.9648	29.4381	32.4731	31.7167	35.2852	31.6713	26.9109	37.8587	1.44205	36.2399		1.69583	1.01581	38.9583	35.7518	27.8584	37.0418	31.1865	32.2223	30.4645	38.0238	31.5196	21.8966	35.4478	0.5806
1.6975	28.2666	27.7113	23.3887	27.5872	24.2969	27.1783	21.6895	27.3716	23.3381	14.7041	31.9829	2.14035	0.851046		1.6975	0.57554	37.3658	30.5823	35.4808	33.6357	34.2446	31.6184	33.2385	29.5268	25.0719	38.1066	1.67281	36.8738		1.6975	1.24328	34.3133	35.1172	30.2303	37.451	30.6216	30.483	30.2025	36.0115	33.843	26.6755	32.3336	0.915503
1.69917	27.6402	23.6683	22.9651	28.6742	26.2223	27.0997	23.5239	23.0758	21.7787	15.0026	29.1558	1.53963	1.10364		1.69917	1.33233	35.1502	32.7673	33.8315	33.1653	33.5543	30.2138	35.3096	33.0432	27.3295	35.5007	1.07721	38.5156		1.69917	0.542888	37.4017	35.5762	30.0342	36.9607	28.7553	31.2463	29.7388	35.7655	31.5044	24.264	34.0234	0.809422
1.70083	27.6119	27.5176	27.8203	24.7011	25.9001	24.3791	22.4165	23.8741	22.7748	15.3355	32.001	0.60631	0.98781		1.70083	1.08947	38.5096	31.0071	34.9527	32.6972	33.292	31.0004	37.3731	31.6837	25.6238	36.0345	0.677289	35.9907		1.70083	0.935352	38.4415	33.9035	30.9479	38.3022	33.1443	31.5582	30.0379	36.4471	31.4397	23.7262	33.9893	0.737188
1.7025	24.7777	25.8987	25.0711	27.0133	26.8916	26.327	20.8806	25.4606	21.0262	15.2733	30.9462	0.574884	0.539875		1.7025	1.64307	34.6084	30.1804	38.2759	31.7344	35.2008	32.1561	35.7961	30.1657	22.686	35.1048	1.38377	36.8358		1.7025	0.454143	39.9512	35.2465	30.6475	34.1091	32.046	32.7901	32.5368	35.5825	32.0044	22.9197	35.5302	0.561932
1.70417	29.0642	30.6531	25.3645	26.153	25.5131	28.1696	20.5313	23.931	21.0803	14.1058	32.707	1.23945	0.81797		1.70417	0.85112	35.6488	30.4464	34.7501	32.3749	36.2069	32.8866	30.8913	29.9591	23.9956	35.85	1.85868	38.9141		1.70417	0.973668	36.9453	33.8238	31.114	37.5781	31.5719	28.3196	30.3927	36.0012	31.049	22.4575	34.9772	1.0662
1.70583	25.9011	27.6548	23.0072	27.1331	23.6876	28.2074	23.7183	26.7044	21.1161	13.8293	28.4598	0.822455	1.12638		1.70583	1.12954	35.6454	29.7318	35.9682	33.8133	35.7519	32.3216	34.0419	32.3212	26.8659	34.961	1.29492	36.9194		1.70583	0.804598	34.8661	32.6966	31.0069	37.8519	30.7001	35.0879	28.9031	33.2574	32.4967	23.9361	32.2022	0.57477
1.7075	26.694	26.512	24.4825	27.9477	25.7461	28.3654	20.1556	24.7617	20.4578	13.7931	33.1996	1.08113	1.11021		1.7075	0.490478	38.7831	31.055	36.6361	30.5546	35.0364	31.5082	36.7274	28.5014	24.7847	36.915	2.2346	38.0512		1.7075	1.25797	34.8606	33.2276	29.4865	36.8788	34.9742	34.1623	29.9702	37.2038	32.2954	23.5307	35.8769	0.732466
1.70917	28.592	28.1446	25.5029	28.5637	26.8662	27.6772	24.8412	22.4855	22.2746	14.8866	31.4292	0.989968	0.749657		1.70917	1.04705	34.4641	33.446	35.6399	33.8122	33.3728	27.3973	35.2451	32.0958	24.471	37.1419	1.30976	39.0641		1.70917	1.00645	36.071	37.2228	33.6553	35.0869	31.7864	31.114	27.638	39.0459	32.8297	24.2182	35.698	1.5731
1.71083	26.6834	26.9819	26.1805	25.153	24.2197	25.805	21.0953	22.8512	22.1951	14.9113	31.2071	1.43184	0.505306		1.71083	0.46417	37.5743	30.2634	36.1788	33.2902	36.7139	31.6724	36.8755	30.5789	24.6123	35.8881	1.34373	36.0189		1.71083	0.757846	36.7209	36.6491	30.4167	35.6719	30.5441	30.9122	28.3689	37.8073	29.9135	23.1397	33.5436	1.35299
1.7125	27.9122	26.9698	24.4932	25.313	26.7155	27.3773	21.35	26.047	21.8778	14.441	28.8192	1.08335	0.826044		1.7125	0.879624	38.2628	30.6785	36.2817	37.422	35.9548	33.4648	32.7715	32.9513	23.4169	38.448	1.14057	37.1772		1.7125	0.614902	35.2269	38.4745	29.0906	36.3516	30.8668	32.0788	31.0546	36.4181	30.7538	21.6771	35.4611	2.03484
1.71417	26.6708	26.5028	25.6655	28.2304	26.2324	27.9437	20.6951	24.1455	20.3126	15.5485	30.5987	1.2813	1.19286		1.71417	0.635268	36.4713	31.7598	37.1801	33.4896	33.1106	33.1148	37.4299	31.3253	27.9335	37.814	1.65797	38.4224		1.71417	1.19404	33.9396	35.4701	29.6543	34.7344	34.4672	30.6852	30.9133	38.2456	32.3431	24.4125	31.7615	0.667887
1.71583	27.697	28.8066	25.1418	29.2719	25.7637	26.2818	23.0195	23.3587	20.03	15.3263	32.4918	0.944494	1.08568		1.71583	0.576467	34.3842	31.7743	34.3463	33.9739	36.0175	32.9625	36.9782	32.0291	24.293	36.0711	1.98619	37.0979		1.71583	0.84663	37.0812	35.0862	31.6433	35.7197	32.5681	36.1071	30.3293	38.942	30.4184	22.4037	34.4052	1.49938
1.7175	30.1677	28.2858	24.1833	25.0476	28.0426	27.1179	22.2539	24.2449	21.6069	15.3291	34.6182	1.2828	0.821001		1.7175	1.1489	38.545	32.6429	36.1283	33.767	37.3741	33.3209	37.1491	31.3246	26.0725	37.7737	2.65173	38.5064		1.7175	1.19218	37.6335	33.0067	30.3886	38.1377	34.1877	30.6863	30.0276	38.9388	31.2298	25.3939	36.0598	1.25579
1.71917	27.7965	24.7536	21.1062	27.0362	26.2254	26.5177	23.7	22.5778	21.0795	14.4383	29.0789	0.534926	1.11562		1.71917	0.791325	36.4142	31.3982	35.0358	32.457	36.3636	34.9714	33.6767	30.8488	27.2063	37.9907	1.23337	37.8516		1.71917	1.11729	36.8264	37.2783	30.7626	37.3671	31.1492	31.8981	30.5688	38.4854	33.3363	24.0837	34.2191	1.68914
1.72083	28.4735	24.0015	27.7025	29.6151	26.7826	26.7194	21.6208	26.0628	20.4082	14.7021	31.1318	1.03809	0.568038		1.72083	1.1159	38.797	31.5091	33.6216	32.3072	31.4202	31.5851	36.1431	31.5138	24.1737	35.344	2.05829	35.8996		1.72083	1.16177	44.6027	34.7526	29.8139	37.6988	31.2378	30.6932	29.5272	37.5094	31.449	24.6489	33.041	0.598949
1.7225	26.901	26.3108	25.3684	27.1743	23.5816	30.0352	20.8742	23.341	21.0251	16.254	35.3429	1.04223	1.28242		1.7225	1.27167	35.6181	30.8424	38.146	35.0052	32.0994	32.1536	36.0634	31.9904	25.3205	37.8749	0.8089	37.559		1.7225	0.926416	37.061	36.3043	32.0044	35.2407	32.0558	33.9025	30.948	36.57	29.7427	26.5541	35.354	1.07718
1.72417	28.6911	28.902	24.7243	30.0871	23.9342	27.3202	22.651	22.3205	23.0694	14.7254	27.8159	1.25834	1.42912		1.72417	0.785975	37.8061	31.939	33.1559	33.8005	32.9071	31.0233	36.5991	30.0367	27.8557	37.4086	2.30257	38.875		1.72417	1.12466	41.312	33.7637	30.0767	37.6355	30.6672	31.207	28.915	39.121	32.7989	25.0006	34.6308	0.123719
1.72583	26.299	25.3851	26.7825	28.1094	26.5454	27.7307	22.625	24.3352	21.6715	15.1779	32.011	0.762841	1.08338		1.72583	0.751025	36.5375	32.4735	35.6259	35.853	35.7431	29.9402	35.1953	30.8453	27.7331	37.2369	0.7888	36.9018		1.72583	0.990797	35.4232	33.3053	29.1338	34.8855	32.8631	31.5203	28.6483	36.6565	31.7979	24.8429	35.4284	0.859252
1.7275	29.1696	27.9143	25.8778	27.0868	26.1067	29.4604	20.4463	22.1874	23.7159	14.5758	33.3241	1.14938	0.89782		1.7275	1.16893	37.8745	32.4825	34.4606	30.5611	36.8794	32.9707	35.8826	28.981	24.154	36.1641	2.38047	41.1778		1.7275	1.13165	37.3277	36.2829	29.7009	38.4531	32.6344	32.0512	29.438	41.4317	33.0141	22.9267	34.9625	1.49528
1.72917	30.4519	29.0343	26.6579	26.7955	24.5994	26.367	20.352	22.7399	22.6867	13.9843	32.6103	1.4647	0.751718		1.72917	0.646106	34.8864	34.9109	34.2486	33.5127	34.5613	33.584	36.5406	31.3469	26.3349	36.8745	1.06552	40.7495		1.72917	1.24808	40.2171	36.8031	31.3231	36.7577	32.8966	30.6652	31.1722	38.1894	31.2081	24.2505	33.3461	0.874434
1.73083	28.7819	25.4255	23.162	27.4688	25.3394	26.9866	20.9045	24.6985	22.0661	14.8787	31.2092	1.17278	1.16407		1.73083	1.15306	33.0469	33.5965	34.5329	35.677	34.7402	35.0717	34.9667	30.7254	26.9265	38.8306	1.02924	38.0542		1.73083	0.898453	38.3021	36.2284	28.5119	34.4804	32.0388	33.5757	29.6573	39.7675	33.3486	23.0408	34.542	0.756316
1.7325	28.616	28.7255	27.3879	23.6547	30.5657	26.4887	22.81	21.4378	21.983	15.3409	29.1075	1.58929	0.788543		1.7325	1.76564	37.1142	31.0991	35.1024	32.2355	36.1373	31.5293	33.8524	27.309	26.8651	37.8556	0.829307	35.7537		1.7325	1.23544	35.199	37.3089	30.7297	38.9742	31.2346	32.7376	30.5327	36.5748	30.2767	24.2579	34.5699	0.990834
1.73417	28.7535	26.3458	25.469	26.4968	24.6752	27.2448	20.6773	21.7986	20.589	16.5912	30.4403	0.716815	1.24346		1.73417	1.92132	39.4285	32.444	37.9375	35.5431	36.2281	31.9333	38.5013	29.511	25.9633	36.1852	1.93025	41.1577		1.73417	0.815346	35.2178	34.7683	29.6292	37.2349	32.1325	32.2037	29.7605	38.6952	32.4826	25.2856	36.2644	0.744934
1.73583	28.8992	27.4972	27.1564	24.9463	26.4929	27.1913	24.3538	24.5728	22.3349	14.3791	30.8286	1.19899	1.38852		1.73583	1.07209	36.788	31.6454	37.497	32.3472	35.519	32.9562	36.2258	31.815	25.8958	38.4752	1.6921	36.8703		1.73583	0.783136	36.9332	33.9983	30.6539	35.5785	30.6618	33.9121	29.3346	37.4691	30.6628	25.7892	35.778	1.37525
1.7375	29.6843	25.7263	26.5859	26.4333	27.4586	29.8735	21.1979	23.9037	22.8645	14.2028	31.2727	1.38696	0.493382		1.7375	0.974824	37.634	33.5461	32.6223	33.9062	36.6342	32.6337	36.1224	30.1699	24.9802	39.4419	1.66911	40.0903		1.7375	0.755368	37.9499	35.4726	32.6869	37.5757	33.1057	32.8674	30.2775	35.6661	33.7575	23.144	32.7894	1.49727
1.73917	28.3778	28.1813	23.9361	32.0057	22.878	30.2365	21.3175	24.6682	21.6645	15.1804	29.9308	0.894552	1.58939		1.73917	1.35671	36.2606	35.4434	34.1138	30.7757	37.6642	32.7416	34.4935	31.3724	26.0363	36.1665	0.519351	38.7019		1.73917	0.779979	34.8244	35.836	30.0252	36.2522	32.2443	33.9774	30.5335	36.4616	31.6142	23.5668	36.2273	1.94092
1.74083	30.2122	24.9328	26.023	24.6584	28.3361	29.4601	23.9159	26.4112	24.1133	15.4021	30.8321	1.07698	1.20975		1.74083	0.844887	38.79	32.1148	36.4495	35.1849	35.718	31.724	34.4011	30.8653	28.8026	37.5655	1.9968	38.9652		1.74083	0.566226	35.5582	34.7199	30.2314	38.5429	33.4354	34.7953	31.4915	37.8548	33.1223	26.097	34.3173	1.1072
1.7425	29.6106	28.5314	23.6328	25.7531	27.6087	30.1299	21.9544	27.8578	20.6199	15.7211	29.2025	1.31253	1.01448		1.7425	0.666137	39.62	34.7985	39.0257	32.0718	35.0855	34.9017	34.3243	31.4591	27.0872	37.8712	1.7248	38.6693		1.7425	0.724753	38.5576	35.2254	31.4238	36.0653	32.0176	33.8558	30.461	37.1872	30.1834	23.2	35.3984	0.821254
1.74417	27.4245	26.5972	25.0718	28.2708	25.1846	28.3359	21.1082	24.4877	25.3257	18.313	31.8963	0.752381	0.34713		1.74417	0.84226	36.5785	32.852	36.5781	34.545	34.6275	29.4493	35.565	30.6583	28.7934	36.9871	1.75151	38.2469		1.74417	0.833699	39.3004	36.0529	34.4898	37.38	33.2811	34.4378	30.5792	39.3252	30.3516	23.6047	40.035	2.08767
1.74583	30.7242	29.2965	23.56	29.6709	28.1566	27.9622	22.5494	27.4814	22.2145	17.6328	33.5307	1.06238	0.757412		1.74583	0.519786	38.5235	35.2515	35.2991	33.061	36.3271	31.4689	37.3213	32.1238	26.1781	37.9107	1.07495	34.827		1.74583	0.636356	36.2806	36.5164	30.8765	37.7095	29.646	31.8879	27.2682	38.8765	34.2039	24.6739	36.8933	0.534816
1.7475	27.3768	30.4325	26.974	26.3005	24.9928	26.0542	23.3503	24.3602	21.6724	15.766	30.9839	1.41028	1.54995		1.7475	0.820454	36.2377	32.9386	33.253	35.195	36.9002	30.6556	36.1186	35.1859	27.4881	35.8978	0.881144	36.0801		1.7475	0.734421	36.5497	34.4892	32.8006	35.3284	30.8374	33.5981	30.1008	36.0516	33.1307	25.8407	38.3465	1.12804
1.74917	31.0817	28.1836	24.2027	27.7316	27.5086	29.2432	22.6746	25.671	22.3045	15.0964	31.3873	0.438084	0.956226		1.74917	0.854938	38.5643	35.9886	36.7179	33.4279	34.2738	33.2524	37.2705	31.782	26.8179	38.203	1.62661	40.3459		1.74917	0.39617	36.0857	33.899	34.3651	36.586	28.7098	33.6065	31.7369	38.2119	31.4339	24.834	35.1052	0.992501
1.75083	28.3862	27.3127	24.9542	28.405	27.0696	25.2122	23.6397	23.9659	25.1754	15.9309	32.2656	1.26008	1.01392		1.75083	0.539794	39.8918	34.1268	37.1676	36.0858	40.1617	31.109	36.0512	29.4632	24.8525	39.2918	0.910299	40.5869		1.75083	0.997939	39.3009	33.3403	30.0514	36.4989	30.184	30.2071	30.0446	40.7772	31.5533	24.0667	35.0263	0.560874
1.7525	33.994	26.133	26.1446	29.9085	23.9607	29.0229	24.1835	22.3065	23.4898	14.0294	30.3119	0.681446	0.529213		1.7525	1.11641	38.7564	31.343	36.1481	33.7952	37.6874	31.9852	33.1304	33.6424	25.842	37.5098	1.73402	38.787		1.7525	1.47904	36.9632	36.7693	28.7017	36.9848	29.9462	33.9821	30.4281	38.8066	32.7334	25.6337	37.8951	0.449708
1.75417	29.483	28.349	23.5541	29.0717	26.1986	28.5714	20.6207	26.6639	19.6267	16.8285	31.5422	0.79258	1.15072		1.75417	1.02065	38.3177	32.6861	36.0561	35.3369	33.8581	31.1013	33.7719	33.085	25.711	38.7645	1.41125	39.532		1.75417	0.87547	36.5903	37.7135	31.4023	35.0307	32.7516	32.6812	28.5726	41.1551	32.5609	22.6388	35.1784	1.23456
1.75583	27.8394	27.2818	24.6514	28.3969	24.593	26.8434	20.6693	23.8494	21.5244	16.4634	31.3891	1.09601	1.73355		1.75583	0.795733	35.9709	30.118	36.2038	34.3408	30.8441	33.1526	38.0586	31.0522	27.4451	39.164	0.767299	37.8175		1.75583	1.20759	37.8793	38.1469	32.8976	38.6593	35.1616	32.0005	32.055	39.2401	33.9147	21.8654	33.7105	0.796522
1.7575	32.751	26.0205	24.3336	26.6596	27.7694	28.2711	22.2457	20.6879	22.9111	17.8016	29.632	1.18126	1.25229		1.7575	0.895822	38.8843	31.882	35.4341	36.1096	35.7803	32.8394	34.9639	30.9386	25.2739	39.7094	1.6842	38.714		1.7575	0.823467	37.0528	40.4163	31.6265	36.4968	31.2291	33.5578	31.1887	35.9141	32.407	22.7126	34.4195	0.444517
1.75917	26.8115	26.3893	25.8067	26.9457	24.0378	28.9137	22.6852	24.1166	24.2739	16.9293	31.8258	0.97251	1.56976		1.75917	0.931099	37.2266	37.1339	33.5101	33.5176	35.2445	32.4547	37.0045	32.8185	25.2849	34.118	1.42056	36.116		1.75917	1.24389	38.4026	35.9665	35.3528	36.2138	29.3256	32.1443	31.757	39.9427	33.4483	24.3913	34.835	1.08204
1.76083	30.7407	26.0698	27.5413	29.0298	26.7224	27.9972	20.4463	25.6452	20.9011	15.6883	32.2445	0.812259	0.830229		1.76083	1.04449	37.5838	34.0007	36.2053	36.9364	36.7999	31.6706	34.428	32.8841	25.3532	38.7704	1.34895	36.716		1.76083	0.602007	40.9772	37.2803	32.5645	40.606	31.9147	36.5079	30.5543	37.8502	29.2928	24.6085	35.5479	0.503104
1.7625	28.864	29.6432	24.9288	25.3545	27.986	27.2211	23.8904	25.2473	23.2997	17.5915	27.5767	1.13926	1.84421		1.7625	1.08094	36.8637	34.0206	34.6213	31.4133	32.4459	33.1716	38.5804	31.7506	27.8267	38.0041	1.59904	37.6375		1.7625	1.35947	37.7591	35.7494	27.8792	36.8741	34.1019	35.2252	30.2882	38.6662	32.289	23.4192	33.4005	1.40107
1.76417	27.5015	27.5672	27.4005	27.2799	29.4941	28.0312	23.4825	23.4434	21.9001	16.1688	28.7923	0.214238	1.13775		1.76417	0.738857	32.3779	31.0227	37.2501	34.9388	34.3345	32.4003	35.4659	33.3292	26.5998	33.8873	1.13791	39.1639		1.76417	1.12833	35.4651	34.7553	34.035	37.5173	31.0329	35.7441	27.9203	38.4422	29.2845	25.0735	35.7247	1.26347
1.76583	29.611	27.8576	25.294	27.5374	27.044	27.3189	20.4876	25.124	23.9545	15.3525	31.0227	0.932876	0.808046		1.76583	0.78907	36.1089	34.3598	37.1875	32.3795	33.3189	32.3384	36.1818	32.4295	26.5156	35.7866	1.45103	38.853		1.76583	1.04785	39.1624	35.6929	31.5739	37.565	31.2567	33.5825	32.3937	38.0346	29.8379	25.9168	36.2107	1.69122
1.7675	29.5211	29.1147	25.0678	27.825	24.9304	29.3215	22.9247	24.2468	24.2405	15.8696	30.6757	0.665676	1.2788		1.7675	1.24475	37.4811	32.3636	36.2508	34.753	35.1383	33.7663	37.5278	31.0183	25.7195	37.7702	1.21285	35.1618		1.7675	1.1275	39.9304	38.396	27.7103	37.6066	30.0716	33.7025	31.252	37.6202	32.0307	26.7942	34.5407	1.01649
1.76917	30.6656	29.098	27.9276	27.2546	25.7474	26.7764	24.8801	25.512	22.4278	15.0391	30.8295	1.23399	0.835492		1.76917	0.906344	38.1664	33.06	37.6113	35.6033	35.7644	33.4099	37.0736	31.7191	27.757	40.4851	1.42594	39.138		1.76917	1.11884	38.5055	35.3427	32.5001	34.1317	30.4367	32.2548	30.4845	39.5	31.8326	25.0565	34.0992	1.43557
1.77083	30.0952	28.2583	24.7868	27.9623	28.0094	27.4485	23.3066	25.1773	23.5134	15.7313	30.9226	1.19158	0.582399		1.77083	1.04194	36.7744	31.868	37.2837	34.0015	37.0517	31.4439	36.6422	32.9515	27.8005	38.8905	1.26594	38.0033		1.77083	1.43638	41.7525	35.0189	33.2797	37.3233	30.3443	35.303	33.7937	35.5317	31.826	25.9363	32.4068	1.30466
1.7725	27.9638	30.2092	27.3927	30.2739	26.8363	29.8808	25.1725	24.9872	22.6881	16.6421	33.7669	1.07402	0.946725		1.7725	0.736058	36.6688	30.6656	36.397	34.4776	35.3687	31.4946	39.2792	31.665	27.7669	36.7784	1.75274	38.6517		1.7725	0.539712	39.8666	37.9194	32.8139	36.7899	28.1197	34.3927	31.0965	37.437	31.7579	23.703	35.678	0.49513
1.77417	27.7994	26.8622	26.5497	28.6648	26.103	28.1586	26.1461	25.5193	21.7949	14.3308	30.8989	0.969035	1.06562		1.77417	0.927724	37.424	30.8962	35.3931	36.4202	34.666	33.4967	35.2713	33.2352	28.5771	37.1515	1.3494	40.4408		1.77417	1.90064	38.9881	35.4691	30.3358	33.4718	33.4481	32.7243	31.6904	39.4691	34.6941	26.7035	34.8318	0.966764
1.77583	31.7017	24.3616	27.3115	26.8591	26.2563	27.8715	23.3575	23.239	23.366	16.1116	30.5726	0.84133	0.951969		1.77583	0.911658	37.7693	33.6667	34.9751	34.6616	36.8372	34.0583	37.9387	30.5728	27.0799	34.9543	1.67664	36.8898		1.77583	0.592174	38.588	33.5601	29.2157	36.4414	33.8729	37.7574	30.3101	41.0506	34.4161	26.3129	37.5253	1.73676
1.7775	31.9076	27.6371	24.7729	29.9979	26.8497	29.733	21.9081	24.9	23.9387	13.9999	32.2574	1.15022	0.767392		1.7775	0.696097	37.566	35.8822	35.2852	33.3885	38.2775	34.4633	37.0171	34.165	27.1772	40.7833	1.4028	39.949		1.7775	1.1172	39.8233	37.9781	32.6603	35.3346	34.4275	33.2052	30.1256	41.7921	31.4961	26.9134	37.5128	0.958101
1.77917	30.3188	27.3385	27.2439	29.9017	26.6791	27.6424	22.2356	25.2832	25.3098	16.9463	33.1354	0.65378	0.863036		1.77917	0.930996	37.4295	36.2482	36.0907	36.3503	36.7098	30.4308	40.4862	32.1037	28.0039	37.2579	1.48524	41.4096		1.77917	0.951557	36.2752	36.2053	31.0305	37.9129	32.6099	29.7942	30.3506	39.0943	32.1981	24.3641	33.1725	1.64918
1.78083	25.6813	26.356	29.8794	28.1666	25.5805	28.3857	20.561	27.5469	24.7883	17.132	30.6536	0.975651	0.98408		1.78083	0.918836	38.2911	31.7216	37.6804	35.5873	34.7182	31.0026	36.7172	33.8474	26.776	34.0788	1.19284	39.5952		1.78083	1.08644	37.5043	37.3053	31.6235	33.5569	32.3961	33.8825	29.7849	40.8443	33.0081	25.9676	34.9169	1.76469
1.7825	29.2201	28.2254	27.2585	27.8918	24.0389	26.8593	22.2905	24.0152	22.2653	17.3575	30.722	1.05427	1.04903		1.7825	0.566067	36.8428	31.9222	35.8856	35.2085	35.9237	31.3547	36.152	32.2272	27.6274	36.9353	2.26116	41.1333		1.7825	1.33961	38.1026	34.9019	32.017	38.1309	30.3404	33.6243	31.9514	36.6857	31.3249	23.602	36.0026	1.56014
1.78417	30.6234	26.4498	27.9956	27.5391	28.0178	25.0451	20.6375	24.4994	22.593	14.6634	32.1002	0.698553	0.972405		1.78417	1.01304	37.2073	30.4105	36.1494	35.055	36.9817	33.1545	38.1715	33.402	26.1329	36.5941	1.62636	39.453		1.78417	1.17392	37.5652	38.0467	30.4235	34.7421	33.1375	33.838	31.0324	36.7155	34.3813	24.4929	31.9567	1.17047
1.78583	32.8061	30.2553	28.5811	31.1003	26.9157	28.5838	20.8526	23.5234	22.7583	18.1213	31.178	0.66421	0.495925		1.78583	0.842049	41.5749	30.0982	37.7125	34.3525	36.804	33.4595	36.7753	32.679	26.7514	38.9379	1.48078	37.765		1.78583	0.714363	37.7511	36.7338	31.0805	35.4209	33.8413	34.896	30.1742	37.3118	33.7683	24.6572	31.7994	0.974483
1.7875	29.3254	29.946	25.2703	26.3318	25.7403	28.1543	21.4698	24.8476	22.4807	16.2891	30.5218	1.33898	0.887638		1.7875	1.24132	37.6938	32.8595	36.9869	32.0477	36.0992	31.9045	36.1813	32.1578	26.1941	38.9008	0.943224	39.9897		1.7875	0.830873	36.1757	36.0489	28.9132	39.2309	35.0829	31.084	28.8366	38.6971	35.2401	22.1921	33.7627	1.04927
1.78917	31.7734	24.9311	25.7715	29.6625	27.7773	30.5103	26.2144	24.8339	24.2916	15.8625	29.7567	0.445048	1.02397		1.78917	0.691339	35.5733	33.7086	32.6068	34.0909	33.4312	31.747	35.689	34.5984	28.6795	36.8017	0.555733	37.3386		1.78917	1.01256	39.212	34.8128	31.646	36.9364	29.0458	33.5653	28.7437	38.9001	32.5687	26.1638	35.0055	1.38807
1.79083	27.0896	28.0898	25.4641	28.2938	27.6503	30.291	23.656	26.9869	23.0208	16.0412	31.4544	0.808493	1.21322		1.79083	0.905457	38.3658	35.9572	35.5949	38.4599	37.3503	32.1322	38.5915	31.5815	27.4152	34.0428	1.70529	37.6107		1.79083	0.978203	36.3652	39.6475	31.0765	37.7631	35.1898	33.3311	32.9549	40.0483	37.1913	22.6231	35.0922	1.62513
1.7925	29.3767	27.932	25.8724	27.2263	28.1146	27.8591	23.2174	28.3991	23.5869	16.8589	30.9571	1.13934	1.46576		1.7925	0.72093	38.9447	35.0873	36.9572	35.3256	36.6596	31.9362	34.0873	33.0004	31.0907	39.8778	0.835704	38.622		1.7925	0.934024	37.3721	38.1468	30.0402	39.3146	32.5895	34.0081	30.5713	39.3166	31.028	25.1995	35.3163	0.837096
1.79417	27.6731	27.8582	26.3007	27.6025	29.9683	27.9189	23.9271	25.5052	23.0534	16.0966	32.9899	1.37435	1.45106		1.79417	1.06434	35.015	33.3795	35.3282	32.2491	35.0817	32.0758	35.9028	34.2878	25.873	35.9273	1.19621	37.9624		1.79417	0.241785	38.459	35.7188	32.2858	35.5004	34.6755	37.1681	31.3993	37.8749	31.2133	24.7832	36.7112	1.91533
1.79583	28.371	27.2845	25.6019	27.4835	27.5014	26.5697	21.0049	25.0796	25.5723	15.3571	32.9926	1.16019	0.94024		1.79583	1.0897	36.1054	32.9821	36.7924	36.1172	38.4545	32.2092	34.3646	34.83	28.6215	39.6544	1.47065	36.3898		1.79583	0.736218	38.5413	35.0463	30.0745	36.1856	31.4521	35.5437	33.8894	40.6097	31.8832	22.8078	34.616	0.515873
1.7975	30.954	27.3804	26.9493	29.0647	28.1089	27.0775	22.4674	29.0204	24.1706	17.1981	29.1535	1.27426	0.900564		1.7975	1.19873	37.1202	30.1514	36.5061	33.1428	36.509	33.6382	36.5592	32.8578	27.7488	38.3234	1.20796	40.1754		1.7975	1.28104	35.2562	38.5548	31.4787	38.0456	32.9777	35.0262	32.0211	38.4745	33.6051	26.2903	31.7612	1.30476
1.79917	28.6255	27.6242	26.8076	28.158	27.5822	28.914	24.6468	25.2466	23.7783	18.3952	31.1113	1.33109	0.945886		1.79917	0.877926	35.8002	34.0976	33.8189	36.3796	35.1046	35.2861	38.5564	31.7805	25.3985	38.8458	0.750957	37.2346		1.79917	0.956104	40.039	34.1334	30.3503	37.4785	33.8898	32.1046	30.8494	40.7785	31.3589	23.4199	32.8799	1.56165
1.80083	30.9349	30.2522	25.4259	27.7725	25.9073	27.7784	23.4007	25.358	26.4331	17.7465	30.6894	1.64886	1.07541		1.80083	1.5665	36.3137	34.8374	37.8692	35.6549	37.0513	33.3291	35.7074	35.2394	25.4399	39.0016	1.97601	41.6224		1.80083	1.32424	38.345	37.0373	29.6778	34.9779	32.7451	36.2786	30.9886	40.2092	31.2665	25.8267	34.6807	0.472113
1.8025	29.2129	28.6329	25.7961	27.4374	26.6259	27.7936	25.1103	25.5675	24.9197	15.088	28.6659	0.716239	1.14681		1.8025	0.615249	37.5159	34.4746	35.5944	32.6263	34.8798	32.7782	37.9591	32.485	24.6106	39.1241	1.86262	37.2591		1.8025	0.972059	37.5853	36.5171	35.1097	38.9716	35.3953	30.7086	30.4046	38.521	32.6902	25.1271	36.7197	0.754538
1.80417	26.2865	27.4756	24.4246	31.1577	26.5645	30.8369	24.6901	24.4987	23.4941	16.565	30.9306	1.49273	0.908167		1.80417	0.646705	38.537	34.076	38.7609	32.7436	35.2218	34.3384	38.1369	35.7709	29.494	37.2558	1.93786	40.3172		1.80417	1.10307	38.8967	35.0385	31.664	39.0542	32.0305	34.4661	32.2024	37.3698	35.498	26.7192	35.4607	0.718026
1.80583	30.0336	28.5209	26.6414	26.0167	26.3254	28.406	24.6546	25.0307	19.4944	17.4042	33.4945	1.05758	1.51436		1.80583	0.675077	39.9282	33.3804	36.4421	35.7	35.4626	33.7518	37.3553	31.0293	28.2048	38.1808	1.82342	38.8946		1.80583	1.22086	40.1057	35.1342	31.1395	37.0684	30.0365	33.5981	30.5095	36.4872	34.9278	22.3993	35.2045	0.825299
[truncated: 717 more rows]

## Sheet: Fig.6B oligo quant
Relative oligomerization	Aggregation ranking	trial1	trial2	trial3
[truncated: 29 more rows]

[truncated: 4 more sheets: Fig.6D oligo quant, S8 CD, S9 G17T vs G17AP, SI14 Pearson and Spearman R]
